# Supplementary material for: Evaluation of Solvent Compatibilities for Headspace-SIFT-MS Analysis of Pharmaceutical Products
Source: MDPI journal article supplement (doi:10.3390/analytica4030024), 2023-07-12

## SUPPLEMENTARY MATERIALS

# Evaluation of Solvent Compatibilities for Headspace-SIFT-MS Analysis of Pharmaceutical Products

Mark J. Perkins <sup>1</sup>, Leslie P. Silva <sup>2</sup>, and Vaughan S. Langford <sup>3,\*</sup>

<sup>1</sup> Element Materials Technology, Girton, Cambridge CB3 0NA, UK

<sup>2</sup> Syft Technologies Inc., Los Angeles, CA, USA

<sup>3</sup> Syft Technologies Limited, Christchurch 8011, New Zealand

\* Correspondence: vaughan.langford@syft.com; Tel.: +64-3-3386701

## Contents

### Tables

#### A. Materials and Methods

|                                                                                                                                    |   |
|------------------------------------------------------------------------------------------------------------------------------------|---|
| Table S1. Reagent ions, primary product ion mass-to-charge ratios (m/z), and branching ratio (in parentheses, %) for the analytes. | 3 |
|------------------------------------------------------------------------------------------------------------------------------------|---|

#### B. Linearity

|                                                                                         |    |
|-----------------------------------------------------------------------------------------|----|
| Table S2. Mix 1 in <u>water</u> across both concentration ranges.                       | 4  |
| Table S3. Mix 2 in <u>water</u> across the low concentration range.                     | 5  |
| Table S4a. Mix 1 in 5% <u>DMAC</u> :95% water across the high concentration range.      | 6  |
| Table S4b. Mix 1 in 10% <u>DMAC</u> :90% water across the high concentration range.     | 7  |
| Table S4c. Mix 1 in 25% <u>DMAC</u> :75% water across the high concentration range.     | 8  |
| Table S4d. Mix 1 in 50% <u>DMAC</u> :50% water across the high concentration range.     | 9  |
| Table S5. Mix 1 in 5% <u>DMF</u> :95% water across the high concentration range.        | 10 |
| Table S6a. Mix 1 in 5% <u>DMI</u> :95% water across both concentration ranges.          | 11 |
| Table S6b. Mix 1 in 10% <u>DMI</u> :90% water across both concentration ranges.         | 12 |
| Table S6c. Mix 1 in 25% <u>DMI</u> :75% water across the high concentration range.      | 13 |
| Table S6d. Mix 1 in 50% <u>DMI</u> :50% water across the high concentration range.      | 14 |
| Table S6e. Mix 1 in 75% <u>DMI</u> :25% water across the high concentration range.      | 15 |
| Table S6f. Mix 1 in 100% <u>DMI</u> across the high concentration range.                | 16 |
| Table S7a. Mix 2 in 10% <u>DMI</u> :90% water across the low concentration range.       | 17 |
| Table S7b. Mix 2 in 100% <u>DMI</u> across the high concentration range.                | 18 |
| Table S8a. Mix 1 in 5% <u>DMSO</u> :95% water across the high concentration range.      | 19 |
| Table S8b. Mix 1 in 10% <u>DMSO</u> :90% water across the high concentration range.     | 20 |
| Table S8c. Mix 1 in 25% <u>DMSO</u> :75% water across the high concentration range.     | 21 |
| Table S9. Mix 1 in 5% <u>methanol</u> :95% water across the high concentration range.   | 22 |
| Table S10. Mix 1 in 5% <u>triacetin</u> :95% water across the high concentration range. | 23 |

#### C. Repeatability

|                                                                                              |    |
|----------------------------------------------------------------------------------------------|----|
| Table S11. Mix 1 in <u>water</u> at three levels in high concentration range.                | 24 |
| Table S12a. Mix 1 in 5% <u>DMAC</u> :95% water at three levels in high concentration range.  | 25 |
| Table S12b. Mix 1 in 10% <u>DMAC</u> :90% water at three levels in high concentration range. | 26 |
| Table S12c. Mix 1 in 25% <u>DMAC</u> :75% water at three levels in high concentration range. | 27 |
| Table S12d. Mix 1 in 50% <u>DMAC</u> :50% water at three levels in high concentration range. | 28 |
| Table S13. Mix 1 in 5% <u>DMF</u> :95% water at three levels in high concentration range.    | 29 |

## Contents (continued)

|                                                                                                             |    |
|-------------------------------------------------------------------------------------------------------------|----|
| Table S14a. Mix 1 in 5% <u>DMAC</u> :95% water at three levels in high concentration range.                 | 30 |
| Table S14b. Mix 1 in 10% <u>DMAC</u> :90% water at three levels in high concentration range.                | 31 |
| Table S14c. Mix 1 in 25% <u>DMAC</u> :75% water at three levels in high concentration range.                | 32 |
| Table S14d. Mix 1 in 50% <u>DMAC</u> :50% water at three levels in high concentration range.                | 33 |
| Table S14e. Mix 1 in 75% <u>DMAC</u> :25% water at three levels in high concentration range.                | 34 |
| Table S14f. Mix 1 in 100% <u>DMAC</u> water at three levels in high concentration range.                    | 35 |
| Table S15. Mix 2 in 100% <u>DMAC</u> water at three levels in high concentration range.                     | 36 |
| Table S16a. Mix 1 in 5% <u>DMSO</u> :95% water at three levels in high concentration range.                 | 37 |
| Table S16b. Mix 1 in 10% <u>DMSO</u> :90% water at three levels in high concentration range.                | 38 |
| Table S16c. Mix 1 in 25% <u>DMSO</u> :75% water at three levels in high concentration range.                | 39 |
| Table S17. Mix 1 in 5% <u>methanol</u> :95% water at three levels in high concentration range.              | 40 |
| Table S18. Mix 1 in 5% <u>triacetin</u> :95% water at three levels in high concentration range.             | 41 |
| <br>                                                                                                        |    |
| D. Limit of Quantitation                                                                                    |    |
| Table S19. Mix 1 in <u>water</u> .                                                                          | 42 |
| Table S20a. Mix 1 in 5% <u>DMI</u> :95% water.                                                              | 43 |
| Table S20b. Mix 1 in 10% <u>DMI</u> :90% water.                                                             | 44 |
| Table S20c. Mix 1 in 100% <u>DMI</u> .                                                                      | 45 |
| Table S21a. Mix 2 in 10% <u>DMI</u> :90% water.                                                             | 46 |
| Table S21b. Mix 2 in 100% <u>DMI</u> .                                                                      | 47 |
| <br>                                                                                                        |    |
| E. Recovery                                                                                                 |    |
| Table S22a. Mix 1 in 5% <u>DMI</u> :95% water solution of aspirin.                                          | 48 |
| Table S22b. Mix 1 in 100% <u>DMI</u> solution of aspirin.                                                   | 49 |
| Table S23. Mix 2 in 100% <u>DMI</u> solution of aspirin.                                                    | 50 |
| <br>                                                                                                        |    |
| Figures                                                                                                     |    |
| A. Measured Headspace Concentrations Relative to Aqueous Solutions                                          |    |
| Figure S1. Mix 1 in water:solvent (0–10%) mixtures – <u>all solvents</u> .                                  | 51 |
| Figure S2. Mix 1 in water:solvent (0–100%) mixtures – <u>DMAC</u> , <u>DMI</u> , and <u>DMSO</u> .          | 53 |
| <br>                                                                                                        |    |
| B. Linearity                                                                                                |    |
| Figure S3. Mix 1 in 95% water:5% solvent – <u>all solvents</u> .                                            | 56 |
| Figure S4. Mix 1 in 5, 10, 25, and 50% <u>DMAC</u> : water solutions.                                       | 58 |
| Figure S5. Mix 1 in 5, 10, 25, 50, 75 and 100% <u>DMI</u> :water solutions in the high concentration range. | 61 |
| Figure S6. Mix 1 in 5 and 10% <u>DMI</u> : water solutions in the low concentration range.                  | 63 |
| Figure S7. Mix 1 in 5, 10, and 25% <u>DMSO</u> : water solutions.                                           | 66 |

## Tables

### A. Materials and Methods

**Table S1.** Reagent ions, primary product ion mass-to-charge ratios ( $m/z$ ), and branching ratio (in parentheses, %) for the analytes. The listed  $m/z$  are those used to quantify target compounds, not necessarily all that are available.

| Compound, Molecular Formula                          | Reagent Ion                   | Product Ion Formula                                                          | Product Ion $m/z$ | Ion Signal Ratios | Reference* |
|------------------------------------------------------|-------------------------------|------------------------------------------------------------------------------|-------------------|-------------------|------------|
| Acetone, C <sub>3</sub> H <sub>6</sub> O             | NO <sup>+</sup>               | C <sub>3</sub> H <sub>6</sub> O.NO <sup>+</sup>                              | 88                | 100%              | [31]       |
| Acetonitrile, C <sub>2</sub> H <sub>3</sub> N        | H <sub>3</sub> O <sup>+</sup> | C <sub>2</sub> H <sub>3</sub> N.H <sup>+</sup>                               | 42                | 100%              | [32]       |
|                                                      | NO <sup>+</sup>               | C <sub>2</sub> H <sub>3</sub> N.NO <sup>+</sup>                              | 71**              | 100%              |            |
| Benzene, C <sub>6</sub> H <sub>6</sub>               | NO <sup>+</sup>               | C <sub>6</sub> H <sub>6</sub> <sup>+</sup>                                   | 78                | 76%               | [33]       |
|                                                      | NO <sup>+</sup>               | C <sub>6</sub> H <sub>6</sub> .NO <sup>+</sup>                               | 108               | 24%               |            |
|                                                      | O <sub>2</sub> <sup>+</sup>   | C <sub>6</sub> H <sub>6</sub> <sup>+</sup>                                   | 78                | 100%              |            |
| 1-Butanol, C <sub>4</sub> H <sub>10</sub> O          | NO <sup>+</sup>               | C <sub>4</sub> H <sub>9</sub> O <sup>+</sup>                                 | 73                | 95%               | [29]       |
| Chloroform, CHCl <sub>3</sub>                        | O <sub>2</sub> <sup>+</sup>   | CH <sup>35</sup> Cl <sub>2</sub> <sup>+</sup>                                | 83                | 56%               | [34]       |
|                                                      | O <sub>2</sub> <sup>+</sup>   | CH <sup>35</sup> Cl <sup>37</sup> Cl <sup>+</sup>                            | 85                | 38%               |            |
| Isooctane, C <sub>8</sub> H <sub>18</sub>            | H <sub>3</sub> O <sup>+</sup> | C <sub>8</sub> H <sub>17</sub> <sup>+</sup>                                  | 113               | 22%               | [35]       |
|                                                      | NO <sup>+</sup>               | C <sub>8</sub> H <sub>17</sub> <sup>+</sup>                                  | 113               | 93%               |            |
| Isopropyl alcohol, C <sub>3</sub> H <sub>8</sub> O   | H <sub>3</sub> O <sup>+</sup> | C <sub>3</sub> H <sub>7</sub> <sup>+</sup>                                   | 43                | 80%               | [29]       |
|                                                      | NO <sup>+</sup>               | C <sub>3</sub> H <sub>7</sub> O <sup>+</sup>                                 | 59                | 100%              |            |
| Methanol, CH <sub>4</sub> O                          | H <sub>3</sub> O <sup>+</sup> | CH <sub>4</sub> O.H <sup>+</sup>                                             | 33                | 100%              | [29]       |
| Methyl ethyl ketone, C <sub>4</sub> H <sub>8</sub> O | NO <sup>+</sup>               | C <sub>4</sub> H <sub>8</sub> O.NO <sup>+</sup>                              | 102               | 100%              | [31]       |
|                                                      | O <sub>2</sub> <sup>+</sup>   | C <sub>4</sub> H <sub>8</sub> O <sup>+</sup>                                 | 72                | 35%               |            |
| Nitromethane, CH <sub>3</sub> NO <sub>2</sub>        | H <sub>3</sub> O <sup>+</sup> | CH <sub>3</sub> NO <sub>2</sub> .H <sup>+</sup>                              | 62                | 100%              | [36]       |
|                                                      | NO <sup>+</sup>               | CH <sub>3</sub> NO <sub>2</sub> .NO <sup>+</sup>                             | 91**              | 100%              |            |
| Propanal, C <sub>3</sub> H <sub>6</sub> O            | NO <sup>+</sup>               | C <sub>3</sub> H <sub>5</sub> O <sup>+</sup>                                 | 57                | 100%              | [31]       |
| Tetrahydrofuran, C <sub>4</sub> H <sub>8</sub> O     | NO <sup>+</sup>               | C <sub>4</sub> H <sub>7</sub> O <sup>+</sup>                                 | 71                | 100%              | [37]       |
|                                                      | O <sub>2</sub> <sup>+</sup>   | C <sub>4</sub> H <sub>7</sub> O <sup>+</sup>                                 | 71                | 55%               |            |
| Toluene, C <sub>7</sub> H <sub>8</sub>               | NO <sup>+</sup>               | C <sub>7</sub> H <sub>8</sub> <sup>+</sup>                                   | 92                | 100%              | [33]       |
|                                                      | O <sub>2</sub> <sup>+</sup>   | C <sub>7</sub> H <sub>8</sub> <sup>+</sup>                                   | 92                | 100%              |            |
| Trichloroethylene, C <sub>2</sub> HCl <sub>3</sub>   | NO <sup>+</sup>               | C <sub>2</sub> H <sup>35</sup> Cl <sub>3</sub> <sup>+</sup>                  | 160**             | 42%               | [34]       |
|                                                      | NO <sup>+</sup>               | C <sub>2</sub> H <sup>35</sup> Cl <sub>2</sub> <sup>37</sup> Cl <sup>+</sup> | 162**             | 42%               |            |
|                                                      | O <sub>2</sub> <sup>+</sup>   | C <sub>2</sub> H <sup>35</sup> Cl <sub>3</sub> <sup>+</sup>                  | 130               | 42%               |            |
|                                                      | O <sub>2</sub> <sup>+</sup>   | C <sub>2</sub> H <sup>35</sup> Cl <sub>2</sub> <sup>37</sup> Cl <sup>+</sup> | 132               | 42%               |            |

\* Reference numbers correspond to citations in the article itself.

\*\* The NO<sup>+</sup> product ion was only used with methanol solvent because the reaction rate coefficient ( $k$ ) is approximately 10-fold slower than the usual product ion, hence reducing sensitivity.

## B. Linearity

**Table S2.** SIFT-MS linearity data for Mix 1 in water across both low and high concentration ranges. SIFT-MS response is the headspace concentration in ppmV.

| Concentration Level  | Acetone<br>(NO <sup>+</sup> 88) | Acetonitrile<br>(H <sub>3</sub> O <sup>+</sup> 42) | Benzene<br>(NO <sup>+</sup> 78) | Benzene<br>(NO <sup>+</sup> 108) | Benzene<br>(O <sub>2</sub> <sup>+</sup> 78) | 1-Butanol<br>(NO <sup>+</sup> 73) | Chloroform<br>(O <sub>2</sub> <sup>+</sup> 83) | Chloroform<br>(O <sub>2</sub> <sup>+</sup> 85) | Isooctane<br>(H <sub>3</sub> O <sup>+</sup> 113) | Isooctane<br>(NO <sup>+</sup> 113) | Isopropyl alcohol<br>(H <sub>3</sub> O <sup>+</sup> 43) | Isopropyl alcohol<br>(NO <sup>+</sup> 59) | Methanol<br>(H <sub>3</sub> O <sup>+</sup> 33) | Methyl ethyl ketone<br>(NO <sup>+</sup> 102) | Methyl ethyl ketone<br>(O <sub>2</sub> <sup>+</sup> 72) | Nitromethane<br>(H <sub>3</sub> O <sup>+</sup> 62) | Propanal<br>(NO <sup>+</sup> 57) | Tetrahydrofuran<br>(NO <sup>+</sup> 71) | Tetrahydrofuran<br>(O <sub>2</sub> <sup>+</sup> 71) | Toluene<br>(NO <sup>+</sup> 92) | Toluene<br>(O <sub>2</sub> <sup>+</sup> 92) | Trichloroethylene<br>(O <sub>2</sub> <sup>+</sup> 130) | Trichloroethylene<br>(O <sub>2</sub> <sup>+</sup> 132) |
|----------------------|---------------------------------|----------------------------------------------------|---------------------------------|----------------------------------|---------------------------------------------|-----------------------------------|------------------------------------------------|------------------------------------------------|--------------------------------------------------|------------------------------------|---------------------------------------------------------|-------------------------------------------|------------------------------------------------|----------------------------------------------|---------------------------------------------------------|----------------------------------------------------|----------------------------------|-----------------------------------------|-----------------------------------------------------|---------------------------------|---------------------------------------------|--------------------------------------------------------|--------------------------------------------------------|
| 0                    | 0.0051                          | 0.0108                                             | 0.00061                         | 0.00102                          | 0.00101                                     | 0.00199                           | 0.0109                                         | 0.0126                                         | 0.119                                            | 0.0135                             | 0.00559                                                 | 0.00843                                   | 0.00486                                        | 0.00027                                      | 0.00462                                                 | 0.00056                                            | 0.00109                          | 0.00149                                 | 0.00277                                             | 0.00010                         | 0.00057                                     | 0.00058                                                | 0.00117                                                |
| 1                    | 0.0107                          | 0.0155                                             | 0.00273                         | 0.00263                          | 0.00315                                     | 0.00862                           | 0.0191                                         | 0.0172                                         | 0.127                                            | 0.016                              | 0.00881                                                 | 0.0106                                    | 0.00905                                        | 0.00364                                      | 0.00988                                                 | 0.00601                                            | 0.0045                           | 0.00745                                 | 0.00735                                             | 0.00299                         | 0.00232                                     | 0.00289                                                | 0.00244                                                |
| 2                    | 0.019                           | 0.0201                                             | 0.00509                         | 0.00383                          | 0.00492                                     | 0.0155                            | 0.0245                                         | 0.0233                                         | 0.108                                            | 0.0181                             | 0.0111                                                  | 0.0128                                    | 0.0138                                         | 0.00605                                      | 0.0148                                                  | 0.00991                                            | 0.00968                          | 0.0127                                  | 0.0097                                              | 0.00504                         | 0.00451                                     | 0.00438                                                | 0.00696                                                |
| 3                    | 0.0229                          | 0.0235                                             | 0.00668                         | 0.00421                          | 0.00691                                     | 0.0231                            | 0.031                                          | 0.0288                                         | 0.116                                            | 0.0204                             | 0.0158                                                  | 0.0144                                    | 0.0175                                         | 0.00945                                      | 0.0205                                                  | 0.0161                                             | 0.0135                           | 0.0194                                  | 0.0154                                              | 0.00753                         | 0.00636                                     | 0.00925                                                | 0.00792                                                |
| 5                    | 0.0331                          | 0.0338                                             | 0.0118                          | 0.00813                          | 0.0109                                      | 0.0356                            | 0.0433                                         | 0.0414                                         | 0.132                                            | 0.0294                             | 0.0213                                                  | 0.022                                     | 0.0235                                         | 0.0167                                       | 0.0334                                                  | 0.026                                              | 0.0221                           | 0.0299                                  | 0.0207                                              | 0.0136                          | 0.00926                                     | 0.0121                                                 | 0.0146                                                 |
| 10                   | 0.0697                          | 0.0599                                             | 0.0213                          | 0.0162                           | 0.021                                       | 0.0693                            | 0.0751                                         | 0.0702                                         | 0.124                                            | 0.0527                             | 0.0398                                                  | 0.0401                                    | 0.0447                                         | 0.0331                                       | 0.0587                                                  | 0.0514                                             | 0.0437                           | 0.0603                                  | 0.0431                                              | 0.0266                          | 0.0215                                      | 0.0252                                                 | 0.0259                                                 |
| 15                   | 0.106                           | 0.0825                                             | 0.0299                          | 0.0225                           | 0.0315                                      | 0.0993                            | 0.113                                          | 0.0963                                         | 0.157                                            | 0.0799                             | 0.0529                                                  | 0.0552                                    | 0.0633                                         | 0.0485                                       | 0.0846                                                  | 0.0738                                             | 0.0674                           | 0.0893                                  | 0.0589                                              | 0.0384                          | 0.0312                                      | 0.0397                                                 | 0.0406                                                 |
| 20                   | 0.135                           | 0.107                                              | 0.0423                          | 0.0302                           | 0.0426                                      | 0.131                             | 0.152                                          | 0.134                                          | 0.174                                            | 0.0958                             | 0.0694                                                  | 0.0695                                    | 0.0809                                         | 0.0671                                       | 0.122                                                   | 0.098                                              | 0.0927                           | 0.123                                   | 0.0791                                              | 0.0489                          | 0.0431                                      | 0.0554                                                 | 0.0579                                                 |
| <b>R<sup>2</sup></b> | <b>0.9981</b>                   | <b>0.9995</b>                                      | <b>0.9977</b>                   | <b>0.9978</b>                    | <b>0.9996</b>                               | <b>0.9996</b>                     | <b>0.9979</b>                                  | <b>0.9974</b>                                  | <b>0.8150</b>                                    | <b>0.9928</b>                      | <b>0.9983</b>                                           | <b>0.9971</b>                             | <b>0.9991</b>                                  | <b>0.9993</b>                                | <b>0.9962</b>                                           | <b>0.9995</b>                                      | <b>0.9989</b>                    | <b>0.9993</b>                           | <b>0.9982</b>                                       | <b>0.9980</b>                   | <b>0.9981</b>                               | <b>0.9963</b>                                          | <b>0.9952</b>                                          |
| 0                    | 0.0179                          | 0.0828                                             | 0.0267                          | 0.0049                           | 0.019                                       | 0.00873                           | 0.0579                                         | 0.055                                          | 0.0772                                           | 0.00246                            | 0.102                                                   | 0.0903                                    | 0.0132                                         | 0.00084                                      | 0.00619                                                 | 0.00112                                            | 0.0024                           | 0.00476                                 | 0.00152                                             | 0.00095                         | 0.00061                                     | 0.0015                                                 | 0.0015                                                 |
| 20                   | 0.156                           | 0.208                                              | 0.0794                          | 0.0381                           | 0.0738                                      | 0.134                             | 0.216                                          | 0.193                                          | 0.141                                            | 0.112                              | 0.185                                                   | 0.156                                     | 0.108                                          | 0.0732                                       | 0.128                                                   | 0.121                                              | 0.101                            | 0.124                                   | 0.0781                                              | 0.0663                          | 0.0512                                      | 0.0664                                                 | 0.0673                                                 |
| 50                   | 0.387                           | 0.385                                              | 0.164                           | 0.104                            | 0.156                                       | 0.311                             | 0.425                                          | 0.388                                          | 0.332                                            | 0.264                              | 0.305                                                   | 0.251                                     | 0.253                                          | 0.18                                         | 0.302                                                   | 0.285                                              | 0.244                            | 0.304                                   | 0.194                                               | 0.16                            | 0.14                                        | 0.161                                                  | 0.155                                                  |
| 100                  | 0.717                           | 0.691                                              | 0.294                           | 0.198                            | 0.309                                       | 0.591                             | 0.822                                          | 0.721                                          | 0.569                                            | 0.532                              | 0.497                                                   | 0.407                                     | 0.483                                          | 0.353                                        | 0.583                                                   | 0.544                                              | 0.482                            | 0.57                                    | 0.365                                               | 0.31                            | 0.274                                       | 0.323                                                  | 0.309                                                  |
| 200                  | 1.5                             | 1.36                                               | 0.645                           | 0.456                            | 0.684                                       | 1.25                              | 1.78                                           | 1.59                                           | 1.3                                              | 1.18                               | 0.948                                                   | 0.785                                     | 1.02                                           | 0.786                                        | 1.26                                                    | 1.17                                               | 1.06                             | 1.23                                    | 0.812                                               | 0.712                           | 0.626                                       | 0.73                                                   | 0.73                                                   |
| 300                  | 2.19                            | 1.99                                               | 0.952                           | 0.654                            | 1.02                                        | 1.85                              | 2.59                                           | 2.39                                           | 1.92                                             | 1.76                               | 1.36                                                    | 1.12                                      | 1.48                                           | 1.14                                         | 1.87                                                    | 1.75                                               | 1.57                             | 1.82                                    | 1.24                                                | 1.09                            | 0.932                                       | 1.13                                                   | 1.06                                                   |
| 400                  | 2.96                            | 2.59                                               | 1.32                            | 0.948                            | 1.42                                        | 2.48                              | 3.46                                           | 3.19                                           | 2.66                                             | 2.45                               | 1.75                                                    | 1.45                                      | 1.91                                           | 1.52                                         | 2.47                                                    | 2.29                                               | 2.15                             | 2.43                                    | 1.66                                                | 1.47                            | 1.3                                         | 1.55                                                   | 1.48                                                   |
| 500                  | 3.8                             | 3.34                                               | 1.65                            | 1.18                             | 1.84                                        | 3.1                               | 4.38                                           | 3.94                                           | 3.38                                             | 3.04                               | 2.23                                                    | 1.85                                      | 2.52                                           | 1.96                                         | 3.22                                                    | 2.88                                               | 2.68                             | 3.13                                    | 2.17                                                | 1.88                            | 1.66                                        | 1.94                                                   | 1.86                                                   |
| <b>R<sup>2</sup></b> | <b>0.9993</b>                   | <b>0.9994</b>                                      | <b>0.9987</b>                   | <b>0.9978</b>                    | <b>0.9975</b>                               | <b>0.9999</b>                     | <b>0.9995</b>                                  | <b>0.9993</b>                                  | <b>0.9978</b>                                    | <b>0.9992</b>                      | <b>0.9995</b>                                           | <b>0.9993</b>                             | <b>0.9986</b>                                  | <b>0.9993</b>                                | <b>0.9991</b>                                           | <b>0.9997</b>                                      | <b>0.9996</b>                    | <b>0.9994</b>                           | <b>0.9985</b>                                       | <b>0.9989</b>                   | <b>0.9985</b>                               | <b>0.9990</b>                                          | <b>0.9987</b>                                          |



**Table S3.** SIFT-MS linearity data for Mix 2 in water across the low concentration range. SIFT-MS response is the headspace concentration in ppmV.

| Concentration Level  | Acetone<br>(NO <sup>+</sup> 88) | Acetonitrile<br>(H <sub>3</sub> O <sup>+</sup> 42) | Benzene<br>(NO <sup>+</sup> 78) | Benzene<br>(NO <sup>+</sup> 108) | Benzene<br>(O <sub>2</sub> <sup>+</sup> 78) | 1-Butanol<br>(NO <sup>+</sup> 73) | Chloroform<br>(O <sub>2</sub> <sup>+</sup> 83) | Chloroform<br>(O <sub>2</sub> <sup>+</sup> 85) | Isooctane<br>(H <sub>3</sub> O <sup>+</sup> 113) | Isooctane<br>(NO <sup>+</sup> 113) | Isopropyl alcohol<br>(H <sub>3</sub> O <sup>+</sup> 43) | Isopropyl alcohol<br>(NO <sup>+</sup> 59) | Methanol<br>(H <sub>3</sub> O <sup>+</sup> 33) | Methyl ethyl ketone<br>(NO <sup>+</sup> 102) | Methyl ethyl ketone<br>(O <sub>2</sub> <sup>+</sup> 72) | Nitromethane<br>(H <sub>3</sub> O <sup>+</sup> 62) | Propanal<br>(NO <sup>+</sup> 57) | Tetrahydrofuran<br>(NO <sup>+</sup> 71) | Tetrahydrofuran<br>(O <sub>2</sub> <sup>+</sup> 71) | Toluene<br>(NO <sup>+</sup> 92) | Toluene<br>(O <sub>2</sub> <sup>+</sup> 92) | Trichloroethylene<br>(O <sub>2</sub> <sup>+</sup> 130) | Trichloroethylene<br>(O <sub>2</sub> <sup>+</sup> 132) |
|----------------------|---------------------------------|----------------------------------------------------|---------------------------------|----------------------------------|---------------------------------------------|-----------------------------------|------------------------------------------------|------------------------------------------------|--------------------------------------------------|------------------------------------|---------------------------------------------------------|-------------------------------------------|------------------------------------------------|----------------------------------------------|---------------------------------------------------------|----------------------------------------------------|----------------------------------|-----------------------------------------|-----------------------------------------------------|---------------------------------|---------------------------------------------|--------------------------------------------------------|--------------------------------------------------------|
| 0                    | 0.00328                         | 0.0252                                             | 0.00548                         | 0.00164                          | 0.00458                                     | 0.00268                           | 0.0107                                         | 0.0102                                         | 0.0721                                           | 0.00538                            | 0.00431                                                 | 0.00322                                   | 0.00344                                        | 0.00007                                      | 0.00433                                                 | 0.00025                                            | 0.00091                          | 0.00164                                 | 0.00279                                             | 0.00022                         | 0.00033                                     | 0.00026                                                | 0.00122                                                |
| 1                    | 0.0107                          | 0.0334                                             | 0.219                           | 0.138                            | 0.21700                                     | 0.00659                           | 0.143                                          | 0.14                                           | 0.132                                            | 0.0678                             | 0.00715                                                 | 0.00618                                   | 0.00519                                        | 0.00744                                      | 0.017                                                   | 0.0043                                             | 0.0632                           | 0.0142                                  | 0.0114                                              | 0.229                           | 0.193                                       | 0.18600                                                | 0.191                                                  |
| 2                    | 0.0172                          | 0.0376                                             | 0.43100                         | 0.291                            | 0.443                                       | 0.011                             | 0.287                                          | 0.27                                           | 0.227                                            | 0.195                              | 0.0104                                                  | 0.00941                                   | 0.00606                                        | 0.0146                                       | 0.0304                                                  | 0.0102                                             | 0.175                            | 0.0305                                  | 0.0207                                              | 0.471                           | 0.39700                                     | 0.38800                                                | 0.389                                                  |
| 3                    | 0.0256                          | 0.0453                                             | 0.63                            | 0.444                            | 0.677                                       | 0.0146                            | 0.43                                           | 0.394                                          | 0.313                                            | 0.264                              | 0.0157                                                  | 0.0142                                    | 0.00951                                        | 0.0226                                       | 0.0456                                                  | 0.0137                                             | 0.252                            | 0.0428                                  | 0.0291                                              | 0.714                           | 0.622                                       | 0.58000                                                | 0.561                                                  |
| 5                    | 0.0383                          | 0.0523                                             | 1.16                            | 0.817                            | 1.24                                        | 0.0228                            | 0.783                                          | 0.715                                          | 0.56                                             | 0.511                              | 0.0239                                                  | 0.0172                                    | 0.012                                          | 0.0374                                       | 0.0681                                                  | 0.0228                                             | 0.481                            | 0.07                                    | 0.0509                                              | 1.32                            | 1.13                                        | 1.08                                                   | 1.05                                                   |
| 10                   | 0.0751                          | 0.0784                                             | 2.36                            | 1.58                             | 2.53                                        | 0.0428                            | 1.58                                           | 1.47                                           | 0.965                                            | 1.02                               | 0.0427                                                  | 0.0356                                    | 0.02                                           | 0.0751                                       | 0.136                                                   | 0.0496                                             | 0.96                             | 0.135                                   | 0.099                                               | 2.67                            | 2.33                                        | 2.22                                                   | 2.17                                                   |
| 15                   | 0.113                           | 0.112                                              | 3.6                             | 2.55                             | 3.87                                        | 0.0644                            | 2.37                                           | 2.22                                           | 1.46                                             | 1.65                               | 0.0634                                                  | 0.0498                                    | 0.0303                                         | 0.108                                        | 0.198                                                   | 0.0742                                             | 1.54                             | 0.208                                   | 0.142                                               | 4.05                            | 3.55                                        | 3.43                                                   | 3.35                                                   |
| 20                   | 0.152                           | 0.131                                              | 4.71                            | 3.22                             | 5.04                                        | 0.0834                            | 3.1                                            | 2.88                                           | 1.94                                             | 2.12                               | 0.0845                                                  | 0.0644                                    | 0.0374                                         | 0.146                                        | 0.266                                                   | 0.0979                                             | 1.94                             | 0.271                                   | 0.205                                               | 5.31                            | 4.68                                        | 4.59                                                   | 4.37                                                   |
| <b>R<sup>2</sup></b> | <b>0.9996</b>                   | <b>0.9955</b>                                      | <b>0.9996</b>                   | <b>0.9983</b>                    | <b>0.9995</b>                               | <b>0.9998</b>                     | <b>0.9996</b>                                  | <b>0.9994</b>                                  | <b>0.9990</b>                                    | <b>0.9984</b>                      | <b>0.9994</b>                                           | <b>0.9979</b>                             | <b>0.9971</b>                                  | <b>0.9996</b>                                | <b>0.9998</b>                                           | <b>0.9995</b>                                      | <b>0.9981</b>                    | <b>0.9997</b>                           | <b>0.9973</b>                                       | <b>0.9996</b>                   | <b>0.9997</b>                               | <b>0.9995</b>                                          | <b>0.9994</b>                                          |

**Table S4a.** SIFT-MS linearity data for Mix 1 in 5% DMAC:95% water across the high concentration range. SIFT-MS response is the headspace concentration in ppmV.

| Concentration Level  | Acetone<br>(NO <sup>+</sup> 88) | Acetonitrile<br>(H <sub>3</sub> O <sup>+</sup> 42) | Benzene<br>(NO <sup>+</sup> 78) | Benzene<br>(NO <sup>+</sup> 108) | Benzene<br>(O <sub>2</sub> <sup>+</sup> 78) | 1-Butanol<br>(NO <sup>+</sup> 73) | Chloroform<br>(O <sub>2</sub> <sup>+</sup> 83) | Chloroform<br>(O <sub>2</sub> <sup>+</sup> 85) | Isooctane<br>(H <sub>3</sub> O <sup>+</sup> 113) | Isooctane<br>(NO <sup>+</sup> 113) | Isopropyl alcohol<br>(H <sub>3</sub> O <sup>+</sup> 43) | Isopropyl alcohol<br>(NO <sup>+</sup> 59) | Methanol<br>(H <sub>3</sub> O <sup>+</sup> 33) | Methyl ethyl ketone<br>(NO <sup>+</sup> 102) | Methyl ethyl ketone<br>(O <sub>2</sub> <sup>+</sup> 72) | Nitromethane<br>(H <sub>3</sub> O <sup>+</sup> 62) | Propanal<br>(NO <sup>+</sup> 57) | Tetrahydrofuran<br>(NO <sup>+</sup> 71) | Tetrahydrofuran<br>(O <sub>2</sub> <sup>+</sup> 71) | Toluene<br>(NO <sup>+</sup> 92) | Toluene<br>(O <sub>2</sub> <sup>+</sup> 92) | Trichloroethylene<br>(O <sub>2</sub> <sup>+</sup> 130) | Trichloroethylene<br>(O <sub>2</sub> <sup>+</sup> 132) |
|----------------------|---------------------------------|----------------------------------------------------|---------------------------------|----------------------------------|---------------------------------------------|-----------------------------------|------------------------------------------------|------------------------------------------------|--------------------------------------------------|------------------------------------|---------------------------------------------------------|-------------------------------------------|------------------------------------------------|----------------------------------------------|---------------------------------------------------------|----------------------------------------------------|----------------------------------|-----------------------------------------|-----------------------------------------------------|---------------------------------|---------------------------------------------|--------------------------------------------------------|--------------------------------------------------------|
| 0                    | 0.134                           | 0.00704                                            | 0.00132                         | 0.00177                          | 0.0017                                      | 0.00679                           | 0.0831                                         | 0.0929                                         | 0.601                                            | 0.0155                             | 0.00408                                                 | 0.00207                                   | 0.00573                                        | 0.00091                                      | 0.0325                                                  | 0.00030                                            | 0.012                            | 0.00626                                 | 0.0461                                              | 0.00067                         | 0.00052                                     | 0.00054                                                | 0.00149                                                |
| 20                   | 0.264                           | 0.0979                                             | 0.0285                          | 0.0189                           | 0.0276                                      | 0.124                             | 0.151                                          | 0.156                                          | 0.658                                            | 0.0773                             | 0.066                                                   | 0.0649                                    | 0.0755                                         | 0.0622                                       | 0.141                                                   | 0.105                                              | 0.0646                           | 0.0875                                  | 0.0895                                              | 0.0343                          | 0.0289                                      | 0.0279                                                 | 0.0307                                                 |
| 50                   | 0.467                           | 0.241                                              | 0.0646                          | 0.0436                           | 0.0687                                      | 0.298                             | 0.265                                          | 0.264                                          | 0.75                                             | 0.165                              | 0.159                                                   | 0.151                                     | 0.185                                          | 0.162                                        | 0.304                                                   | 0.263                                              | 0.141                            | 0.216                                   | 0.181                                               | 0.078                           | 0.0657                                      | 0.0725                                                 | 0.0654                                                 |
| 100                  | 0.736                           | 0.473                                              | 0.133                           | 0.091                            | 0.14                                        | 0.559                             | 0.469                                          | 0.443                                          | 0.936                                            | 0.329                              | 0.311                                                   | 0.299                                     | 0.349                                          | 0.306                                        | 0.576                                                   | 0.512                                              | 0.276                            | 0.417                                   | 0.299                                               | 0.162                           | 0.138                                       | 0.138                                                  | 0.147                                                  |
| 200                  | 1.32                            | 0.904                                              | 0.382                           | 0.248                            | 0.399                                       | 1.11                              | 1.14                                           | 1.04                                           | 1.45                                             | 1                                  | 0.591                                                   | 0.578                                     | 0.652                                          | 0.588                                        | 1.1                                                     | 1.03                                               | 0.859                            | 0.833                                   | 0.589                                               | 0.424                           | 0.374                                       | 0.435                                                  | 0.421                                                  |
| 300                  | 2.05                            | 1.47                                               | 0.608                           | 0.397                            | 0.653                                       | 1.77                              | 1.83                                           | 1.68                                           | 2.12                                             | 1.55                               | 0.976                                                   | 0.941                                     | 1.1                                            | 0.971                                        | 1.77                                                    | 1.59                                               | 1.35                             | 1.35                                    | 0.932                                               | 0.709                           | 0.615                                       | 0.654                                                  | 0.675                                                  |
| 400                  | 2.3                             | 1.83                                               | 0.761                           | 0.515                            | 0.847                                       | 2.18                              | 2.26                                           | 2.09                                           | 2.55                                             | 2.04                               | 1.22                                                    | 1.14                                      | 1.29                                           | 1.2                                          | 2.14                                                    | 2.03                                               | 1.76                             | 1.66                                    | 1.16                                                | 0.896                           | 0.797                                       | 0.892                                                  | 0.839                                                  |
| 500                  | 2.85                            | 2.2                                                | 1.02                            | 0.643                            | 1.08                                        | 2.57                              | 2.82                                           | 2.65                                           | 3.31                                             | 2.69                               | 1.43                                                    | 1.37                                      | 1.58                                           | 1.45                                         | 2.65                                                    | 2.38                                               | 2.28                             | 2.03                                    | 1.42                                                | 1.21                            | 1.07                                        | 1.21                                                   | 1.15                                                   |
| <b>R<sup>2</sup></b> | <b>0.9912</b>                   | <b>0.9969</b>                                      | <b>0.9951</b>                   | <b>0.9969</b>                    | <b>0.9962</b>                               | <b>0.9947</b>                     | <b>0.9957</b>                                  | <b>0.9961</b>                                  | <b>0.9911</b>                                    | <b>0.9950</b>                      | <b>0.9951</b>                                           | <b>0.9950</b>                             | <b>0.9936</b>                                  | <b>0.9966</b>                                | <b>0.9969</b>                                           | <b>0.9963</b>                                      | <b>0.9952</b>                    | <b>0.9971</b>                           | <b>0.9981</b>                                       | <b>0.9949</b>                   | <b>0.9950</b>                               | <b>0.9931</b>                                          | <b>0.9939</b>                                          |

**Table S4b.** SIFT-MS linearity data for Mix 1 in 10% DMAC:90% water across the high concentration range. SIFT-MS response is the headspace concentration in ppmV.

| Concentration Level  | Acetone<br>(NO <sup>+</sup> 88) | Acetonitrile<br>(H <sub>3</sub> O <sup>+</sup> 42) | Benzene<br>(NO <sup>+</sup> 78) | Benzene<br>(NO <sup>+</sup> 108) | Benzene<br>(O <sub>2</sub> <sup>+</sup> 78) | 1-Butanol<br>(NO <sup>+</sup> 73) | Chloroform<br>(O <sub>2</sub> <sup>+</sup> 83) | Chloroform<br>(O <sub>2</sub> <sup>+</sup> 85) | Isooctane<br>(H <sub>3</sub> O <sup>+</sup> 113) | Isooctane<br>(NO <sup>+</sup> 113) | Isopropyl alcohol<br>(H <sub>3</sub> O <sup>+</sup> 43) | Isopropyl alcohol<br>(NO <sup>+</sup> 59) | Methanol<br>(H <sub>3</sub> O <sup>+</sup> 33) | Methyl ethyl ketone<br>(NO <sup>+</sup> 102) | Methyl ethyl ketone<br>(O <sub>2</sub> <sup>+</sup> 72) | Nitromethane<br>(H <sub>3</sub> O <sup>+</sup> 62) | Propanal<br>(NO <sup>+</sup> 57) | Tetrahydrofuran<br>(NO <sup>+</sup> 71) | Tetrahydrofuran<br>(O <sub>2</sub> <sup>+</sup> 71) | Toluene<br>(NO <sup>+</sup> 92) | Toluene<br>(O <sub>2</sub> <sup>+</sup> 92) | Trichloroethylene<br>(O <sub>2</sub> <sup>+</sup> 130) | Trichloroethylene<br>(O <sub>2</sub> <sup>+</sup> 132) |
|----------------------|---------------------------------|----------------------------------------------------|---------------------------------|----------------------------------|---------------------------------------------|-----------------------------------|------------------------------------------------|------------------------------------------------|--------------------------------------------------|------------------------------------|---------------------------------------------------------|-------------------------------------------|------------------------------------------------|----------------------------------------------|---------------------------------------------------------|----------------------------------------------------|----------------------------------|-----------------------------------------|-----------------------------------------------------|---------------------------------|---------------------------------------------|--------------------------------------------------------|--------------------------------------------------------|
| 0                    | 0.257                           | 0.00833                                            | 0.00131                         | 0.00232                          | 0.00176                                     | 0.0159                            | 0.122                                          | 0.13                                           | 1.13                                             | 0.0359                             | 0.00487                                                 | 0.00289                                   | 0.00573                                        | 0.00235                                      | 0.0572                                                  | 0.00244                                            | 0.0242                           | 0.00843                                 | 0.0817                                              | 0.00223                         | 0.00253                                     | 0.00255                                                | 0.0061                                                 |
| 20                   | 0.346                           | 0.0995                                             | 0.024                           | 0.017                            | 0.0231                                      | 0.116                             | 0.18                                           | 0.187                                          | 1.11                                             | 0.0922                             | 0.0606                                                  | 0.0571                                    | 0.0773                                         | 0.0567                                       | 0.153                                                   | 0.0995                                             | 0.0844                           | 0.0862                                  | 0.129                                               | 0.0294                          | 0.0242                                      | 0.0278                                                 | 0.0209                                                 |
| 50                   | 0.474                           | 0.232                                              | 0.0535                          | 0.0341                           | 0.0602                                      | 0.261                             | 0.288                                          | 0.265                                          | 1.28                                             | 0.193                              | 0.157                                                   | 0.143                                     | 0.178                                          | 0.144                                        | 0.296                                                   | 0.256                                              | 0.165                            | 0.206                                   | 0.201                                               | 0.0626                          | 0.0512                                      | 0.0547                                                 | 0.059                                                  |
| 100                  | 0.682                           | 0.451                                              | 0.111                           | 0.0737                           | 0.124                                       | 0.492                             | 0.447                                          | 0.42                                           | 1.38                                             | 0.383                              | 0.276                                                   | 0.279                                     | 0.332                                          | 0.268                                        | 0.536                                                   | 0.487                                              | 0.321                            | 0.389                                   | 0.318                                               | 0.136                           | 0.113                                       | 0.122                                                  | 0.123                                                  |
| 200                  | 1.23                            | 0.879                                              | 0.297                           | 0.203                            | 0.318                                       | 0.939                             | 0.982                                          | 0.933                                          | 2.14                                             | 1.1                                | 0.56                                                    | 0.536                                     | 0.675                                          | 0.537                                        | 1.03                                                    | 0.967                                              | 0.95                             | 0.755                                   | 0.584                                               | 0.333                           | 0.29                                        | 0.359                                                  | 0.338                                                  |
| 300                  | 1.75                            | 1.31                                               | 0.469                           | 0.328                            | 0.504                                       | 1.41                              | 1.49                                           | 1.36                                           | 2.69                                             | 1.69                               | 0.808                                                   | 0.789                                     | 0.99                                           | 0.805                                        | 1.47                                                    | 1.42                                               | 1.43                             | 1.14                                    | 0.846                                               | 0.518                           | 0.449                                       | 0.562                                                  | 0.537                                                  |
| 400                  | 2.52                            | 1.87                                               | 0.658                           | 0.461                            | 0.716                                       | 1.97                              | 2                                              | 1.87                                           | 3.32                                             | 2.23                               | 1.16                                                    | 1.13                                      | 1.39                                           | 1.15                                         | 2.13                                                    | 1.99                                               | 1.92                             | 1.62                                    | 1.18                                                | 0.706                           | 0.633                                       | 0.745                                                  | 0.751                                                  |
| 500                  | 3.02                            | 2.31                                               | 0.836                           | 0.559                            | 0.914                                       | 2.52                              | 2.52                                           | 2.4                                            | 4                                                | 2.94                               | 1.49                                                    | 1.42                                      | 1.68                                           | 1.43                                         | 2.57                                                    | 2.56                                               | 2.5                              | 2.01                                    | 1.45                                                | 0.92                            | 0.827                                       | 1.02                                                   | 0.963                                                  |
| <b>R<sup>2</sup></b> | <b>0.9947</b>                   | <b>0.9986</b>                                      | <b>0.9961</b>                   | <b>0.9953</b>                    | <b>0.9958</b>                               | <b>0.9982</b>                     | <b>0.9969</b>                                  | <b>0.9951</b>                                  | <b>0.9921</b>                                    | <b>0.9953</b>                      | <b>0.9971</b>                                           | <b>0.9982</b>                             | <b>0.9992</b>                                  | <b>0.9984</b>                                | <b>0.9979</b>                                           | <b>0.9983</b>                                      | <b>0.9955</b>                    | <b>0.9985</b>                           | <b>0.9980</b>                                       | <b>0.9971</b>                   | <b>0.9953</b>                               | <b>0.9930</b>                                          | <b>0.9954</b>                                          |

**Table S4c.** SIFT-MS linearity data for Mix 1 in 25% DMAC:75% water across the high concentration range. SIFT-MS response is the headspace concentration in ppmV.

| Concentration Level  | Acetone<br>(NO <sup>+</sup> 88) | Acetonitrile<br>(H <sub>3</sub> O <sup>+</sup> 42) | Benzene<br>(NO <sup>+</sup> 78) | Benzene<br>(NO <sup>+</sup> 108) | Benzene<br>(O <sub>2</sub> <sup>+</sup> 78) | 1-Butanol<br>(NO <sup>+</sup> 73) | Chloroform<br>(O <sub>2</sub> <sup>+</sup> 83) | Chloroform<br>(O <sub>2</sub> <sup>+</sup> 85) | Isooctane<br>(H <sub>3</sub> O <sup>+</sup> 113) | Isooctane<br>(NO <sup>+</sup> 113) | Isopropyl alcohol<br>(H <sub>3</sub> O <sup>+</sup> 43) | Isopropyl alcohol<br>(NO <sup>+</sup> 59) | Methanol<br>(H <sub>3</sub> O <sup>+</sup> 33) | Methyl ethyl ketone<br>(NO <sup>+</sup> 102) | Methyl ethyl ketone<br>(O <sub>2</sub> <sup>+</sup> 72) | Nitromethane<br>(H <sub>3</sub> O <sup>+</sup> 62) | Propanal<br>(NO <sup>+</sup> 57) | Tetrahydrofuran<br>(NO <sup>+</sup> 71) | Tetrahydrofuran<br>(O <sub>2</sub> <sup>+</sup> 71) | Toluene<br>(NO <sup>+</sup> 92) | Toluene<br>(O <sub>2</sub> <sup>+</sup> 92) | Trichloroethylene<br>(O <sub>2</sub> <sup>+</sup> 130) | Trichloroethylene<br>(O <sub>2</sub> <sup>+</sup> 132) |
|----------------------|---------------------------------|----------------------------------------------------|---------------------------------|----------------------------------|---------------------------------------------|-----------------------------------|------------------------------------------------|------------------------------------------------|--------------------------------------------------|------------------------------------|---------------------------------------------------------|-------------------------------------------|------------------------------------------------|----------------------------------------------|---------------------------------------------------------|----------------------------------------------------|----------------------------------|-----------------------------------------|-----------------------------------------------------|---------------------------------|---------------------------------------------|--------------------------------------------------------|--------------------------------------------------------|
| 0                    | 0.324                           | 0.00675                                            | 0.00038                         | 0.00481                          | 0.00091                                     | 0.0161                            | 0.285                                          | 0.288                                          | 2.59                                             | 0.0318                             | 0.00494                                                 | 0.0021                                    | 0.00511                                        | 0.00302                                      | 0.0796                                                  | 0.00019                                            | 0.0194                           | 0.0158                                  | 0.168                                               | 0.0018                          | 0.00135                                     | 0.00135                                                | 0.00193                                                |
| 20                   | 0.46                            | 0.0897                                             | 0.0136                          | 0.00991                          | 0.0139                                      | 0.0813                            | 0.312                                          | 0.313                                          | 2.51                                             | 0.0926                             | 0.0569                                                  | 0.0477                                    | 0.0704                                         | 0.0466                                       | 0.148                                                   | 0.0926                                             | 0.0762                           | 0.0832                                  | 0.202                                               | 0.0153                          | 0.0141                                      | 0.0147                                                 | 0.0206                                                 |
| 50                   | 0.627                           | 0.217                                              | 0.0359                          | 0.0259                           | 0.0363                                      | 0.192                             | 0.371                                          | 0.37                                           | 2.5                                              | 0.183                              | 0.135                                                   | 0.126                                     | 0.184                                          | 0.112                                        | 0.273                                                   | 0.226                                              | 0.153                            | 0.175                                   | 0.266                                               | 0.0369                          | 0.0304                                      | 0.0397                                                 | 0.0427                                                 |
| 100                  | 0.842                           | 0.418                                              | 0.0691                          | 0.0436                           | 0.0691                                      | 0.361                             | 0.503                                          | 0.514                                          | 2.88                                             | 0.363                              | 0.247                                                   | 0.244                                     | 0.34                                           | 0.215                                        | 0.453                                                   | 0.444                                              | 0.303                            | 0.313                                   | 0.368                                               | 0.07                            | 0.062                                       | 0.0789                                                 | 0.0802                                                 |
| 200                  | 1.32                            | 0.82                                               | 0.154                           | 0.0956                           | 0.171                                       | 0.705                             | 0.765                                          | 0.739                                          | 3.21                                             | 0.814                              | 0.506                                                   | 0.466                                     | 0.663                                          | 0.437                                        | 0.834                                                   | 0.861                                              | 0.692                            | 0.633                                   | 0.559                                               | 0.167                           | 0.137                                       | 0.187                                                  | 0.182                                                  |
| 300                  | 1.63                            | 1.21                                               | 0.241                           | 0.16                             | 0.258                                       | 1.05                              | 1.04                                           | 0.987                                          | 3.73                                             | 1.24                               | 0.756                                                   | 0.695                                     | 0.968                                          | 0.647                                        | 1.24                                                    | 1.34                                               | 1.05                             | 0.921                                   | 0.771                                               | 0.244                           | 0.204                                       | 0.292                                                  | 0.304                                                  |
| 400                  | 2.23                            | 1.62                                               | 0.322                           | 0.22                             | 0.346                                       | 1.34                              | 1.33                                           | 1.26                                           | 4.24                                             | 1.73                               | 0.951                                                   | 0.917                                     | 1.36                                           | 0.863                                        | 1.6                                                     | 1.71                                               | 1.43                             | 1.23                                    | 0.995                                               | 0.322                           | 0.277                                       | 0.403                                                  | 0.39                                                   |
| 500                  | 2.65                            | 2                                                  | 0.413                           | 0.284                            | 0.443                                       | 1.67                              | 1.6                                            | 1.52                                           | 4.76                                             | 2.2                                | 1.18                                                    | 1.14                                      | 1.6                                            | 1.06                                         | 2.03                                                    | 2.1                                                | 1.91                             | 1.53                                    | 1.18                                                | 0.416                           | 0.361                                       | 0.521                                                  | 0.502                                                  |
| <b>R<sup>2</sup></b> | <b>0.9966</b>                   | <b>0.9999</b>                                      | <b>0.9989</b>                   | <b>0.9950</b>                    | <b>0.9986</b>                               | <b>0.9994</b>                     | <b>0.9986</b>                                  | <b>0.9987</b>                                  | <b>0.9861</b>                                    | <b>0.9975</b>                      | <b>0.9986</b>                                           | <b>0.9998</b>                             | <b>0.9984</b>                                  | <b>0.9998</b>                                | <b>0.9997</b>                                           | <b>0.9990</b>                                      | <b>0.9960</b>                    | <b>0.9999</b>                           | <b>0.9996</b>                                       | <b>0.9988</b>                   | <b>0.9984</b>                               | <b>0.9974</b>                                          | <b>0.9975</b>                                          |

**Table S4d.** SIFT-MS linearity data for Mix 1 in 50% DMAC:50% water across the high concentration range. SIFT-MS response is the headspace concentration in ppmV.

| Concentration Level  | Acetone<br>(NO <sup>+</sup> 88) | Acetonitrile<br>(H <sub>3</sub> O <sup>+</sup> 42) | Benzene<br>(NO <sup>+</sup> 78) | Benzene<br>(NO <sup>+</sup> 108) | Benzene<br>(O <sub>2</sub> <sup>+</sup> 78) | 1-Butanol<br>(NO <sup>+</sup> 73) | Chloroform<br>(O <sub>2</sub> <sup>+</sup> 83) | Chloroform<br>(O <sub>2</sub> <sup>+</sup> 85) | Isooctane<br>(H <sub>3</sub> O <sup>+</sup> 113) | Isooctane<br>(NO <sup>+</sup> 113) | Isopropyl alcohol<br>(H <sub>3</sub> O <sup>+</sup> 43) | Isopropyl alcohol<br>(NO <sup>+</sup> 59) | Methanol<br>(H <sub>3</sub> O <sup>+</sup> 33) | Methyl ethyl ketone<br>(NO <sup>+</sup> 102) | Methyl ethyl ketone<br>(O <sub>2</sub> <sup>+</sup> 72) | Nitromethane<br>(H <sub>3</sub> O <sup>+</sup> 62) | Propanal<br>(NO <sup>+</sup> 57) | Tetrahydrofuran<br>(NO <sup>+</sup> 71) | Tetrahydrofuran<br>(O <sub>2</sub> <sup>+</sup> 71) | Toluene<br>(NO <sup>+</sup> 92) | Toluene<br>(O <sub>2</sub> <sup>+</sup> 92) | Trichloroethylene<br>(O <sub>2</sub> <sup>+</sup> 130) | Trichloroethylene<br>(O <sub>2</sub> <sup>+</sup> 132) |
|----------------------|---------------------------------|----------------------------------------------------|---------------------------------|----------------------------------|---------------------------------------------|-----------------------------------|------------------------------------------------|------------------------------------------------|--------------------------------------------------|------------------------------------|---------------------------------------------------------|-------------------------------------------|------------------------------------------------|----------------------------------------------|---------------------------------------------------------|----------------------------------------------------|----------------------------------|-----------------------------------------|-----------------------------------------------------|---------------------------------|---------------------------------------------|--------------------------------------------------------|--------------------------------------------------------|
| 0                    | 0.429                           | 0.0133                                             | 0.00211                         | 0.00305                          | 0.00346                                     | 0.019                             | 0.0812                                         | 0.101                                          | 0.974                                            | 0.0233                             | 0.00609                                                 | 0.00356                                   | 0.00418                                        | 0.00181                                      | 0.0719                                                  | 0.00030                                            | 0.0150                           | 0.00918                                 | 0.0689                                              | 0.00156                         | 0.00099                                     | 0.00212                                                | 0.00332                                                |
| 20                   | 0.511                           | 0.0858                                             | 0.171                           | 0.0251                           | 0.131                                       | 0.0579                            | 0.0773                                         | 0.0928                                         | 0.732                                            | 0.0183                             | 0.0492                                                  | 0.046                                     | 0.0810                                         | 0.0309                                       | 0.127                                                   | 0.0576                                             | 0.0172                           | 0.0653                                  | 0.0947                                              | 0.00167                         | 0.00103                                     | 0.00135                                                | 0.00440                                                |
| 50                   | 0.690                           | 0.197                                              | 0.123                           | 0.0222                           | 0.0913                                      | 0.114                             | 0.0887                                         | 0.117                                          | 0.862                                            | 0.0296                             | 0.115                                                   | 0.107                                     | 0.209                                          | 0.0807                                       | 0.230                                                   | 0.150                                              | 0.0509                           | 0.162                                   | 0.157                                               | 0.00664                         | 0.00304                                     | 0.00600                                                | 0.00776                                                |
| 100                  | 0.939                           | 0.373                                              | 0.103                           | 0.0192                           | 0.0763                                      | 0.213                             | 0.108                                          | 0.124                                          | 0.797                                            | 0.0502                             | 0.222                                                   | 0.206                                     | 0.378                                          | 0.156                                        | 0.355                                                   | 0.304                                              | 0.0782                           | 0.319                                   | 0.256                                               | 0.0119                          | 0.00948                                     | 0.0134                                                 | 0.0143                                                 |
| 200                  | 1.52                            | 0.726                                              | 0.0979                          | 0.0259                           | 0.0802                                      | 0.399                             | 0.142                                          | 0.170                                          | 0.929                                            | 0.0994                             | 0.431                                                   | 0.400                                     | 0.761                                          | 0.312                                        | 0.662                                                   | 0.603                                              | 0.153                            | 0.635                                   | 0.457                                               | 0.0229                          | 0.0175                                      | 0.0268                                                 | 0.0286                                                 |
| 300                  | 2.08                            | 1.11                                               | 0.136                           | 0.0575                           | 0.121                                       | 0.585                             | 0.283                                          | 0.290                                          | 1.15                                             | 0.337                              | 0.632                                                   | 0.599                                     | 1.15                                           | 0.497                                        | 0.988                                                   | 0.902                                              | 0.380                            | 0.996                                   | 0.705                                               | 0.0598                          | 0.0465                                      | 0.0680                                                 | 0.0755                                                 |
| 400                  | 2.54                            | 1.45                                               | 0.157                           | 0.0724                           | 0.152                                       | 0.763                             | 0.337                                          | 0.354                                          | 1.26                                             | 0.442                              | 0.841                                                   | 0.784                                     | 1.48                                           | 0.645                                        | 1.28                                                    | 1.21                                               | 0.521                            | 1.34                                    | 0.916                                               | 0.0784                          | 0.0675                                      | 0.0949                                                 | 0.0936                                                 |
| 500                  | 3.22                            | 1.89                                               | 0.191                           | 0.0979                           | 0.198                                       | 0.971                             | 0.486                                          | 0.490                                          | 1.62                                             | 0.665                              | 1.07                                                    | 1.04                                      | 1.86                                           | 0.842                                        | 1.67                                                    | 1.56                                               | 0.726                            | 1.70                                    | 1.19                                                | 0.115                           | 0.0914                                      | 0.128                                                  | 0.121                                                  |
| <b>R<sup>2</sup></b> | <b>0.9987</b>                   | <b>0.9991</b>                                      | <b>0.3622</b>                   | <b>0.9222</b>                    | <b>0.6102</b>                               | <b>0.9997</b>                     | <b>0.9486</b>                                  | <b>0.9574</b>                                  | <b>0.8288</b>                                    | <b>0.9399</b>                      | <b>0.9998</b>                                           | <b>0.9984</b>                             | <b>0.9996</b>                                  | <b>0.9988</b>                                | <b>0.9982</b>                                           | <b>0.9994</b>                                      | <b>0.9679</b>                    | <b>0.9993</b>                           | <b>0.9973</b>                                       | <b>0.9644</b>                   | <b>0.9668</b>                               | <b>0.9713</b>                                          | <b>0.9725</b>                                          |

**Table S5.** SIFT-MS linearity data for Mix 1 in 5% DMF:95% water across the high concentration range. SIFT-MS response is the headspace concentration in ppmV.

| Concentration Level  | Acetone<br>(NO <sup>+</sup> 88) | Acetonitrile<br>(H <sub>3</sub> O <sup>+</sup> 42) | Benzene<br>(NO <sup>+</sup> 78) | Benzene<br>(NO <sup>+</sup> 108) | Benzene<br>(O <sub>2</sub> <sup>+</sup> 78) | 1-Butanol<br>(NO <sup>+</sup> 73) | Chloroform<br>(O <sub>2</sub> <sup>+</sup> 83) | Chloroform<br>(O <sub>2</sub> <sup>+</sup> 85) | Isooctane<br>(H <sub>3</sub> O <sup>+</sup> 113) | Isooctane<br>(NO <sup>+</sup> 113) | Isopropyl alcohol<br>(H <sub>3</sub> O <sup>+</sup> 43) | Isopropyl alcohol<br>(NO <sup>+</sup> 59) | Methanol<br>(H <sub>3</sub> O <sup>+</sup> 33) | Methyl ethyl ketone<br>(NO <sup>+</sup> 102) | Methyl ethyl ketone<br>(O <sub>2</sub> <sup>+</sup> 72) | Nitromethane<br>(H <sub>3</sub> O <sup>+</sup> 62) | Propanal<br>(NO <sup>+</sup> 57) | Tetrahydrofuran<br>(NO <sup>+</sup> 71) | Tetrahydrofuran<br>(O <sub>2</sub> <sup>+</sup> 71) | Toluene<br>(NO <sup>+</sup> 92) | Toluene<br>(O <sub>2</sub> <sup>+</sup> 92) | Trichloroethylene<br>(O <sub>2</sub> <sup>+</sup> 130) | Trichloroethylene<br>(O <sub>2</sub> <sup>+</sup> 132) |
|----------------------|---------------------------------|----------------------------------------------------|---------------------------------|----------------------------------|---------------------------------------------|-----------------------------------|------------------------------------------------|------------------------------------------------|--------------------------------------------------|------------------------------------|---------------------------------------------------------|-------------------------------------------|------------------------------------------------|----------------------------------------------|---------------------------------------------------------|----------------------------------------------------|----------------------------------|-----------------------------------------|-----------------------------------------------------|---------------------------------|---------------------------------------------|--------------------------------------------------------|--------------------------------------------------------|
| 0                    | 0.00557                         | 0.0096                                             | 0.0911                          | 0.0144                           | 0.0704                                      | 0.648                             | 0.0224                                         | 0.0219                                         | 0.0905                                           | 0.00232                            | 0.00556                                                 | 0.00298                                   | 0.0134                                         | 0.00208                                      | 0.0466                                                  | 0.0011                                             | 0.00608                          | 0.00277                                 | 0.00554                                             | 0.00285                         | 0.00456                                     | 0.00118                                                | 0.00256                                                |
| 20                   | 0.132                           | 0.12                                               | 0.104                           | 0.0384                           | 0.094                                       | 0.937                             | 0.143                                          | 0.129                                          | 0.173                                            | 0.119                              | 0.0745                                                  | 0.0599                                    | 0.107                                          | 0.0641                                       | 0.154                                                   | 0.114                                              | 0.108                            | 0.107                                   | 0.0699                                              | 0.0517                          | 0.0446                                      | 0.0532                                                 | 0.0497                                                 |
| 50                   | 0.333                           | 0.298                                              | 0.152                           | 0.0843                           | 0.149                                       | 1.01                              | 0.329                                          | 0.308                                          | 0.362                                            | 0.288                              | 0.194                                                   | 0.15                                      | 0.241                                          | 0.163                                        | 0.32                                                    | 0.284                                              | 0.245                            | 0.255                                   | 0.17                                                | 0.124                           | 0.104                                       | 0.141                                                  | 0.125                                                  |
| 100                  | 0.617                           | 0.575                                              | 0.261                           | 0.157                            | 0.258                                       | 1.4                               | 0.648                                          | 0.587                                          | 0.593                                            | 0.554                              | 0.391                                                   | 0.283                                     | 0.447                                          | 0.31                                         | 0.561                                                   | 0.545                                              | 0.501                            | 0.52                                    | 0.343                                               | 0.251                           | 0.209                                       | 0.258                                                  | 0.247                                                  |
| 200                  | 1.22                            | 1.15                                               | 0.505                           | 0.342                            | 0.524                                       | 1.83                              | 1.36                                           | 1.24                                           | 1.42                                             | 1.14                               | 0.761                                                   | 0.593                                     | 0.864                                          | 0.605                                        | 1.08                                                    | 1.15                                               | 1.07                             | 1.03                                    | 0.68                                                | 0.531                           | 0.455                                       | 0.559                                                  | 0.551                                                  |
| 300                  | 1.86                            | 1.7                                                | 0.752                           | 0.477                            | 0.796                                       | 2.32                              | 1.99                                           | 1.86                                           | 2.08                                             | 1.76                               | 1.12                                                    | 0.88                                      | 1.29                                           | 0.912                                        | 1.67                                                    | 1.68                                               | 1.58                             | 1.57                                    | 1.05                                                | 0.788                           | 0.688                                       | 0.855                                                  | 0.813                                                  |
| 400                  | 2.4                             | 2.24                                               | 0.98                            | 0.653                            | 1.02                                        | 2.63                              | 2.59                                           | 2.36                                           | 2.74                                             | 2.35                               | 1.49                                                    | 1.12                                      | 1.62                                           | 1.18                                         | 2.13                                                    | 2.21                                               | 2.11                             | 1.96                                    | 1.37                                                | 1.01                            | 0.915                                       | 1.13                                                   | 1.08                                                   |
| 500                  | 3.05                            | 2.87                                               | 1.26                            | 0.835                            | 1.33                                        | 3.22                              | 3.34                                           | 3.04                                           | 3.57                                             | 3.02                               | 1.85                                                    | 1.42                                      | 2.18                                           | 1.49                                         | 2.7                                                     | 2.71                                               | 2.8                              | 2.51                                    | 1.77                                                | 1.33                            | 1.17                                        | 1.48                                                   | 1.46                                                   |
| <b>R<sup>2</sup></b> | <b>0.9997</b>                   | <b>0.9997</b>                                      | <b>0.9971</b>                   | <b>0.9987</b>                    | <b>0.9973</b>                               | <b>0.9899</b>                     | <b>0.9994</b>                                  | <b>0.9992</b>                                  | <b>0.9975</b>                                    | <b>0.9993</b>                      | <b>0.9999</b>                                           | <b>0.9993</b>                             | <b>0.9976</b>                                  | <b>0.9998</b>                                | <b>0.9995</b>                                           | <b>0.9994</b>                                      | <b>0.9981</b>                    | <b>0.9989</b>                           | <b>0.9995</b>                                       | <b>0.9988</b>                   | <b>0.9994</b>                               | <b>0.9987</b>                                          | <b>0.9970</b>                                          |

**Table S6a.** SIFT-MS linearity data for Mix 1 in 5% DMI:95% water across both low and high concentration ranges. SIFT-MS response is the headspace concentration in ppmV.

| Concentration Level  | Acetone<br>(NO <sup>+</sup> 88) | Acetonitrile<br>(H <sub>3</sub> O <sup>+</sup> 42) | Benzene<br>(NO <sup>+</sup> 78) | Benzene<br>(NO <sup>+</sup> 108) | Benzene<br>(O <sub>2</sub> <sup>+</sup> 78) | 1-Butanol<br>(NO <sup>+</sup> 73) | Chloroform<br>(O <sub>2</sub> <sup>+</sup> 83) | Chloroform<br>(O <sub>2</sub> <sup>+</sup> 85) | Isooctane<br>(H <sub>3</sub> O <sup>+</sup> 113) | Isooctane<br>(NO <sup>+</sup> 113) | Isopropyl alcohol<br>(H <sub>3</sub> O <sup>+</sup> 43) | Isopropyl alcohol<br>(NO <sup>+</sup> 59) | Methanol<br>(H <sub>3</sub> O <sup>+</sup> 33) | Methyl ethyl ketone<br>(NO <sup>+</sup> 102) | Methyl ethyl ketone<br>(O <sub>2</sub> <sup>+</sup> 72) | Nitromethane<br>(H <sub>3</sub> O <sup>+</sup> 62) | Propanal<br>(NO <sup>+</sup> 57) | Tetrahydrofuran<br>(NO <sup>+</sup> 71) | Tetrahydrofuran<br>(O <sub>2</sub> <sup>+</sup> 71) | Toluene<br>(NO <sup>+</sup> 92) | Toluene<br>(O <sub>2</sub> <sup>+</sup> 92) | Trichloroethylene<br>(O <sub>2</sub> <sup>+</sup> 130) | Trichloroethylene<br>(O <sub>2</sub> <sup>+</sup> 132) |
|----------------------|---------------------------------|----------------------------------------------------|---------------------------------|----------------------------------|---------------------------------------------|-----------------------------------|------------------------------------------------|------------------------------------------------|--------------------------------------------------|------------------------------------|---------------------------------------------------------|-------------------------------------------|------------------------------------------------|----------------------------------------------|---------------------------------------------------------|----------------------------------------------------|----------------------------------|-----------------------------------------|-----------------------------------------------------|---------------------------------|---------------------------------------------|--------------------------------------------------------|--------------------------------------------------------|
| 0                    | 0.00658                         | 0.0449                                             | 0.00267                         | 0.00653                          | 0.00376                                     | 0.003                             | 0.0178                                         | 0.0201                                         | 0.593                                            | 0.0254                             | 0.00761                                                 | 0.00481                                   | 0.0179                                         | 0.00128                                      | 0.0281                                                  | 0.00010                                            | 0.0161                           | 0.0267                                  | 0.0127                                              | 0.00630                         | 0.00636                                     | 0.00199                                                | 0.00323                                                |
| 1                    | 0.0126                          | 0.0559                                             | 0.0057                          | 0.00681                          | 0.00521                                     | 0.00867                           | 0.0256                                         | 0.0264                                         | 0.607                                            | 0.0381                             | 0.0108                                                  | 0.00811                                   | 0.0218                                         | 0.00456                                      | 0.0328                                                  | 0.00527                                            | 0.018                            | 0.0305                                  | 0.0181                                              | 0.00771                         | 0.00765                                     | 0.00291                                                | 0.0057                                                 |
| 2                    | 0.0197                          | 0.0629                                             | 0.00478                         | 0.00814                          | 0.00634                                     | 0.0134                            | 0.0284                                         | 0.0277                                         | 0.6                                              | 0.0412                             | 0.0152                                                  | 0.00989                                   | 0.0259                                         | 0.00614                                      | 0.0408                                                  | 0.0109                                             | 0.0203                           | 0.0365                                  | 0.02                                                | 0.01                            | 0.00829                                     | 0.00647                                                | 0.00603                                                |
| 3                    | 0.0239                          | 0.0544                                             | 0.00853                         | 0.00897                          | 0.00914                                     | 0.018                             | 0.0284                                         | 0.0306                                         | 0.667                                            | 0.04                               | 0.0153                                                  | 0.0125                                    | 0.0299                                         | 0.00915                                      | 0.0406                                                  | 0.0146                                             | 0.0272                           | 0.0414                                  | 0.0236                                              | 0.0133                          | 0.011                                       | 0.00889                                                | 0.0113                                                 |
| 5                    | 0.0364                          | 0.06                                               | 0.0129                          | 0.0119                           | 0.0124                                      | 0.0298                            | 0.0364                                         | 0.0383                                         | 0.596                                            | 0.0486                             | 0.0216                                                  | 0.0165                                    | 0.033                                          | 0.0142                                       | 0.0536                                                  | 0.0256                                             | 0.0373                           | 0.0495                                  | 0.0314                                              | 0.0169                          | 0.0138                                      | 0.013                                                  | 0.0138                                                 |
| 10                   | 0.0708                          | 0.0874                                             | 0.0171                          | 0.0165                           | 0.019                                       | 0.0544                            | 0.0597                                         | 0.0672                                         | 0.698                                            | 0.0755                             | 0.0356                                                  | 0.0309                                    | 0.0531                                         | 0.0293                                       | 0.0729                                                  | 0.0471                                             | 0.0588                           | 0.0756                                  | 0.0438                                              | 0.0263                          | 0.0198                                      | 0.0238                                                 | 0.025                                                  |
| 15                   | 0.0935                          | 0.109                                              | 0.0295                          | 0.0206                           | 0.029                                       | 0.0831                            | 0.0883                                         | 0.0888                                         | 0.724                                            | 0.0935                             | 0.0516                                                  | 0.0436                                    | 0.0719                                         | 0.0421                                       | 0.101                                                   | 0.0751                                             | 0.0863                           | 0.101                                   | 0.0605                                              | 0.037                           | 0.0283                                      | 0.0368                                                 | 0.036                                                  |
| 20                   | 0.118                           | 0.133                                              | 0.0366                          | 0.0266                           | 0.0385                                      | 0.104                             | 0.112                                          | 0.116                                          | 0.666                                            | 0.117                              | 0.063                                                   | 0.0603                                    | 0.087                                          | 0.0552                                       | 0.122                                                   | 0.0994                                             | 0.104                            | 0.126                                   | 0.0769                                              | 0.0474                          | 0.0387                                      | 0.0517                                                 | 0.0487                                                 |
| <b>R<sup>2</sup></b> | <b>0.9955</b>                   | <b>0.9733</b>                                      | <b>0.9859</b>                   | <b>0.9963</b>                    | <b>0.9964</b>                               | <b>0.9987</b>                     | <b>0.9923</b>                                  | <b>0.9953</b>                                  | <b>0.5185</b>                                    | <b>0.9909</b>                      | <b>0.9973</b>                                           | <b>0.9969</b>                             | <b>0.9974</b>                                  | <b>0.9993</b>                                | <b>0.9968</b>                                           | <b>0.9991</b>                                      | <b>0.9963</b>                    | <b>0.9996</b>                           | <b>0.9977</b>                                       | <b>0.9989</b>                   | <b>0.9921</b>                               | <b>0.9962</b>                                          | <b>0.9967</b>                                          |
| 0                    | 0.0111                          | 0.00989                                            | 0.325                           | 0.221                            | 0.332                                       | 0.195                             | 0.199                                          | 0.192                                          | 0.117                                            | 0.0177                             | 0.00657                                                 | 0.00476                                   | 0.0174                                         | 0.00266                                      | 0.034                                                   | 0.00106                                            | 0.0145                           | 0.0248                                  | 0.0317                                              | 0.00631                         | 0.00765                                     | 0.00113                                                | 0.00256                                                |
| 20                   | 0.13                            | 0.114                                              | 0.368                           | 0.225                            | 0.375                                       | 0.258                             | 0.299                                          | 0.301                                          | 0.26                                             | 0.168                              | 0.079                                                   | 0.0598                                    | 0.105                                          | 0.0573                                       | 0.139                                                   | 0.105                                              | 0.104                            | 0.119                                   | 0.101                                               | 0.0489                          | 0.0415                                      | 0.0509                                                 | 0.0494                                                 |
| 50                   | 0.311                           | 0.293                                              | 0.436                           | 0.273                            | 0.422                                       | 0.399                             | 0.48                                           | 0.46                                           | 0.439                                            | 0.299                              | 0.201                                                   | 0.154                                     | 0.235                                          | 0.153                                        | 0.287                                                   | 0.286                                              | 0.255                            | 0.266                                   | 0.192                                               | 0.122                           | 0.1                                         | 0.134                                                  | 0.124                                                  |
| 100                  | 0.626                           | 0.557                                              | 0.528                           | 0.354                            | 0.539                                       | 0.624                             | 0.783                                          | 0.721                                          | 0.731                                            | 0.567                              | 0.37                                                    | 0.293                                     | 0.459                                          | 0.304                                        | 0.526                                                   | 0.536                                              | 0.49                             | 0.512                                   | 0.354                                               | 0.235                           | 0.192                                       | 0.261                                                  | 0.25                                                   |
| 200                  | 1.2                             | 1.1                                                | 0.791                           | 0.51                             | 0.813                                       | 1.08                              | 1.44                                           | 1.34                                           | 1.35                                             | 1.18                               | 0.709                                                   | 0.561                                     | 0.876                                          | 0.577                                        | 1.02                                                    | 1.03                                               | 1.05                             | 0.981                                   | 0.668                                               | 0.511                           | 0.433                                       | 0.568                                                  | 0.546                                                  |
| 300                  | 1.8                             | 1.67                                               | 1.03                            | 0.676                            | 1.08                                        | 1.52                              | 2.08                                           | 1.92                                           | 2.08                                             | 1.7                                | 1.07                                                    | 0.839                                     | 1.33                                           | 0.858                                        | 1.48                                                    | 1.56                                               | 1.55                             | 1.47                                    | 0.986                                               | 0.763                           | 0.665                                       | 0.87                                                   | 0.81                                                   |
| 400                  | 2.55                            | 2.35                                               | 1.32                            | 0.904                            | 1.37                                        | 2.1                               | 2.82                                           | 2.6                                            | 2.71                                             | 2.36                               | 1.45                                                    | 1.19                                      | 1.91                                           | 1.24                                         | 2.13                                                    | 2.11                                               | 2.12                             | 2.06                                    | 1.41                                                | 1.06                            | 0.905                                       | 1.22                                                   | 1.15                                                   |
| 500                  | 3.06                            | 2.82                                               | 1.52                            | 1.03                             | 1.66                                        | 2.48                              | 3.39                                           | 3.14                                           | 3.61                                             | 2.97                               | 1.78                                                    | 1.43                                      | 2.23                                           | 1.51                                         | 2.56                                                    | 2.64                                               | 2.64                             | 2.48                                    | 1.69                                                | 1.28                            | 1.13                                        | 1.44                                                   | 1.41                                                   |
| <b>R<sup>2</sup></b> | <b>0.9988</b>                   | <b>0.9988</b>                                      | <b>0.9983</b>                   | <b>0.9955</b>                    | <b>0.9978</b>                               | <b>0.9984</b>                     | <b>0.9993</b>                                  | <b>0.9992</b>                                  | <b>0.9966</b>                                    | <b>0.9990</b>                      | <b>0.9997</b>                                           | <b>0.9988</b>                             | <b>0.9974</b>                                  | <b>0.9983</b>                                | <b>0.9983</b>                                           | <b>0.9998</b>                                      | <b>0.9996</b>                    | <b>0.9990</b>                           | <b>0.9982</b>                                       | <b>0.9991</b>                   | <b>0.9990</b>                               | <b>0.9981</b>                                          | <b>0.9988</b>                                          |

**Table S6b.** SIFT-MS linearity data for Mix 1 in 10% DMI:10% water across both low and high concentration ranges. SIFT-MS response is the headspace concentration in ppmV.

| Concentration Level  | Acetone<br>(NO <sup>+</sup> 88) | Acetonitrile<br>(H <sub>3</sub> O <sup>+</sup> 42) | Benzene<br>(NO <sup>+</sup> 78) | Benzene<br>(NO <sup>+</sup> 108) | Benzene<br>(O <sub>2</sub> <sup>+</sup> 78) | 1-Butanol<br>(NO <sup>+</sup> 73) | Chloroform<br>(O <sub>2</sub> <sup>+</sup> 83) | Chloroform<br>(O <sub>2</sub> <sup>+</sup> 85) | Isooctane<br>(H <sub>3</sub> O <sup>+</sup> 113) | Isooctane<br>(NO <sup>+</sup> 113) | Isopropyl alcohol<br>(H <sub>3</sub> O <sup>+</sup> 43) | Isopropyl alcohol<br>(NO <sup>+</sup> 59) | Methanol<br>(H <sub>3</sub> O <sup>+</sup> 33) | Methyl ethyl ketone<br>(NO <sup>+</sup> 102) | Methyl ethyl ketone<br>(O <sub>2</sub> <sup>+</sup> 72) | Nitromethane<br>(H <sub>3</sub> O <sup>+</sup> 62) | Propanal<br>(NO <sup>+</sup> 57) | Tetrahydrofuran<br>(NO <sup>+</sup> 71) | Tetrahydrofuran<br>(O <sub>2</sub> <sup>+</sup> 71) | Toluene<br>(NO <sup>+</sup> 92) | Toluene<br>(O <sub>2</sub> <sup>+</sup> 92) | Trichloroethylene<br>(O <sub>2</sub> <sup>+</sup> 130) | Trichloroethylene<br>(O <sub>2</sub> <sup>+</sup> 132) |
|----------------------|---------------------------------|----------------------------------------------------|---------------------------------|----------------------------------|---------------------------------------------|-----------------------------------|------------------------------------------------|------------------------------------------------|--------------------------------------------------|------------------------------------|---------------------------------------------------------|-------------------------------------------|------------------------------------------------|----------------------------------------------|---------------------------------------------------------|----------------------------------------------------|----------------------------------|-----------------------------------------|-----------------------------------------------------|---------------------------------|---------------------------------------------|--------------------------------------------------------|--------------------------------------------------------|
| 0                    | 0.00903                         | 0.0234                                             | 0.00996                         | 0.0108                           | 0.0107                                      | 0.00314                           | 0.0163                                         | 0.0233                                         | 0.825                                            | 0.0413                             | 0.00706                                                 | 0.00806                                   | 0.0291                                         | 0.0023                                       | 0.0496                                                  | 0.00038                                            | 0.0218                           | 0.0419                                  | 0.0201                                              | 0.00953                         | 0.00895                                     | 0.00047                                                | 0.00096                                                |
| 1                    | 0.0141                          | 0.0279                                             | 0.0142                          | 0.0142                           | 0.01260                                     | 0.00883                           | 0.0235                                         | 0.0342                                         | 0.818                                            | 0.0473                             | 0.0103                                                  | 0.011                                     | 0.0359                                         | 0.00504                                      | 0.0527                                                  | 0.00515                                            | 0.028                            | 0.0465                                  | 0.0285                                              | 0.0115                          | 0.0109                                      | 0.00252                                                | 0.00445                                                |
| 2                    | 0.0171                          | 0.0312                                             | 0.01560                         | 0.0149                           | 0.014                                       | 0.0134                            | 0.0283                                         | 0.0362                                         | 0.812                                            | 0.0534                             | 0.0129                                                  | 0.0117                                    | 0.0404                                         | 0.00695                                      | 0.0545                                                  | 0.0088                                             | 0.0303                           | 0.0511                                  | 0.0293                                              | 0.0141                          | 0.01140                                     | 0.00470                                                | 0.00427                                                |
| 3                    | 0.0197                          | 0.0396                                             | 0.0171                          | 0.0159                           | 0.0163                                      | 0.0172                            | 0.0288                                         | 0.0386                                         | 0.809                                            | 0.0645                             | 0.0148                                                  | 0.0145                                    | 0.0425                                         | 0.00979                                      | 0.0586                                                  | 0.0131                                             | 0.0353                           | 0.0513                                  | 0.0321                                              | 0.0152                          | 0.0125                                      | 0.00487                                                | 0.00568                                                |
| 5                    | 0.0338                          | 0.0458                                             | 0.0211                          | 0.0164                           | 0.0197                                      | 0.0256                            | 0.0416                                         | 0.0456                                         | 0.803                                            | 0.0753                             | 0.0208                                                  | 0.0209                                    | 0.0522                                         | 0.0147                                       | 0.0661                                                  | 0.0218                                             | 0.0466                           | 0.0633                                  | 0.0373                                              | 0.0173                          | 0.014                                       | 0.0082                                                 | 0.0106                                                 |
| 10                   | 0.0622                          | 0.0688                                             | 0.0259                          | 0.0218                           | 0.0251                                      | 0.0478                            | 0.066                                          | 0.0676                                         | 0.851                                            | 0.102                              | 0.0373                                                  | 0.032                                     | 0.07                                           | 0.0253                                       | 0.0915                                                  | 0.0458                                             | 0.0756                           | 0.0828                                  | 0.0582                                              | 0.0276                          | 0.0216                                      | 0.0188                                                 | 0.0205                                                 |
| 15                   | 0.0922                          | 0.0901                                             | 0.0312                          | 0.0277                           | 0.0318                                      | 0.0685                            | 0.0916                                         | 0.089                                          | 0.868                                            | 0.122                              | 0.0486                                                  | 0.0472                                    | 0.0827                                         | 0.0379                                       | 0.115                                                   | 0.0711                                             | 0.0944                           | 0.108                                   | 0.0687                                              | 0.0342                          | 0.0268                                      | 0.0276                                                 | 0.0309                                                 |
| 20                   | 0.119                           | 0.119                                              | 0.0398                          | 0.0318                           | 0.0378                                      | 0.0967                            | 0.117                                          | 0.11                                           | 0.858                                            | 0.15                               | 0.0649                                                  | 0.0606                                    | 0.109                                          | 0.0494                                       | 0.132                                                   | 0.0937                                             | 0.125                            | 0.131                                   | 0.0837                                              | 0.0403                          | 0.0324                                      | 0.0349                                                 | 0.04                                                   |
| <b>R<sup>2</sup></b> | <b>0.9977</b>                   | <b>0.9970</b>                                      | <b>0.9813</b>                   | <b>0.9862</b>                    | <b>0.9943</b>                               | <b>0.9976</b>                     | <b>0.9984</b>                                  | <b>0.9957</b>                                  | <b>0.7055</b>                                    | <b>0.9927</b>                      | <b>0.9980</b>                                           | <b>0.9975</b>                             | <b>0.9915</b>                                  | <b>0.9996</b>                                | <b>0.9955</b>                                           | <b>0.9994</b>                                      | <b>0.9968</b>                    | <b>0.9972</b>                           | <b>0.9901</b>                                       | <b>0.9929</b>                   | <b>0.9961</b>                               | <b>0.9964</b>                                          | <b>0.9969</b>                                          |
| 0                    | 0.0112                          | 0.00694                                            | 0.00144                         | 0.0202                           | 0.00107                                     | 0.00492                           | 0.0219                                         | 0.0343                                         | 0.431                                            | 0.0506                             | 0.0158                                                  | 0.0064                                    | 0.0545                                         | 0.0051                                       | 0.0579                                                  | 0.00033                                            | 0.0106                           | 0.0508                                  | 0.0453                                              | 0.0278                          | 0.0249                                      | 0.00169                                                | 0.00411                                                |
| 20                   | 0.125                           | 0.12                                               | 0.0274                          | 0.0333                           | 0.0261                                      | 0.117                             | 0.09                                           | 0.102                                          | 0.416                                            | 0.115                              | 0.0859                                                  | 0.064                                     | 0.141                                          | 0.0611                                       | 0.163                                                   | 0.128                                              | 0.0756                           | 0.144                                   | 0.106                                               | 0.056                           | 0.045                                       | 0.0269                                                 | 0.0241                                                 |
| 50                   | 0.296                           | 0.302                                              | 0.0635                          | 0.0572                           | 0.0614                                      | 0.281                             | 0.196                                          | 0.194                                          | 0.511                                            | 0.212                              | 0.183                                                   | 0.148                                     | 0.278                                          | 0.145                                        | 0.315                                                   | 0.303                                              | 0.175                            | 0.28                                    | 0.195                                               | 0.0944                          | 0.0812                                      | 0.0605                                                 | 0.061                                                  |
| 100                  | 0.581                           | 0.605                                              | 0.132                           | 0.0973                           | 0.131                                       | 0.558                             | 0.38                                           | 0.379                                          | 0.658                                            | 0.381                              | 0.373                                                   | 0.303                                     | 0.498                                          | 0.274                                        | 0.575                                                   | 0.637                                              | 0.351                            | 0.518                                   | 0.35                                                | 0.175                           | 0.134                                       | 0.126                                                  | 0.122                                                  |
| 200                  | 1.14                            | 1.17                                               | 0.314                           | 0.226                            | 0.331                                       | 1.07                              | 0.9                                            | 0.852                                          | 1.36                                             | 0.952                              | 0.7                                                     | 0.578                                     | 0.897                                          | 0.546                                        | 1.06                                                    | 1.19                                               | 0.881                            | 0.964                                   | 0.659                                               | 0.364                           | 0.304                                       | 0.324                                                  | 0.291                                                  |
| 300                  | 1.72                            | 1.75                                               | 0.499                           | 0.319                            | 0.517                                       | 1.6                               | 1.37                                           | 1.29                                           | 1.87                                             | 1.48                               | 1.07                                                    | 0.878                                     | 1.3                                            | 0.838                                        | 1.58                                                    | 1.82                                               | 1.38                             | 1.42                                    | 1.01                                                | 0.547                           | 0.465                                       | 0.504                                                  | 0.487                                                  |
| 400                  | 2.29                            | 2.34                                               | 0.671                           | 0.425                            | 0.7                                         | 2.1                               | 1.86                                           | 1.77                                           | 2.31                                             | 1.95                               | 1.36                                                    | 1.15                                      | 1.75                                           | 1.08                                         | 2.09                                                    | 2.39                                               | 1.84                             | 1.9                                     | 1.33                                                | 0.734                           | 0.619                                       | 0.669                                                  | 0.673                                                  |
| 500                  | 2.81                            | 2.86                                               | 0.845                           | 0.549                            | 0.897                                       | 2.57                              | 2.37                                           | 2.21                                           | 3.46                                             | 2.65                               | 1.68                                                    | 1.42                                      | 2.16                                           | 1.34                                         | 2.53                                                    | 2.94                                               | 2.45                             | 2.33                                    | 1.6                                                 | 0.904                           | 0.799                                       | 0.907                                                  | 0.84                                                   |
| <b>R<sup>2</sup></b> | <b>0.9998</b>                   | <b>0.9997</b>                                      | <b>0.9984</b>                   | <b>0.9974</b>                    | <b>0.9978</b>                               | <b>0.9995</b>                     | <b>0.9983</b>                                  | <b>0.9986</b>                                  | <b>0.9713</b>                                    | <b>0.9939</b>                      | <b>0.9991</b>                                           | <b>0.9998</b>                             | <b>0.9998</b>                                  | <b>0.9996</b>                                | <b>0.9996</b>                                           | <b>0.9996</b>                                      | <b>0.9963</b>                    | <b>0.9999</b>                           | <b>0.9993</b>                                       | <b>0.9991</b>                   | <b>0.9971</b>                               | <b>0.9953</b>                                          | <b>0.9964</b>                                          |



**Table S6c.** SIFT-MS linearity data for Mix 1 in 25% DMI:75% water across the high concentration range. SIFT-MS response is the headspace concentration in ppmV.

| Concentration Level  | Acetone<br>(NO <sup>+</sup> 88) | Acetonitrile<br>(H <sub>3</sub> O <sup>+</sup> 42) | Benzene<br>(NO <sup>+</sup> 78) | Benzene<br>(NO <sup>+</sup> 108) | Benzene<br>(O <sub>2</sub> <sup>+</sup> 78) | 1-Butanol<br>(NO <sup>+</sup> 73) | Chloroform<br>(O <sub>2</sub> <sup>+</sup> 83) | Chloroform<br>(O <sub>2</sub> <sup>+</sup> 85) | Isooctane<br>(H <sub>3</sub> O <sup>+</sup> 113) | Isooctane<br>(NO <sup>+</sup> 113) | Isopropyl alcohol<br>(H <sub>3</sub> O <sup>+</sup> 43) | Isopropyl alcohol<br>(NO <sup>+</sup> 59) | Methanol<br>(H <sub>3</sub> O <sup>+</sup> 33) | Methyl ethyl ketone<br>(NO <sup>+</sup> 102) | Methyl ethyl ketone<br>(O <sub>2</sub> <sup>+</sup> 72) | Nitromethane<br>(H <sub>3</sub> O <sup>+</sup> 62) | Propanal<br>(NO <sup>+</sup> 57) | Tetrahydrofuran<br>(NO <sup>+</sup> 71) | Tetrahydrofuran<br>(O <sub>2</sub> <sup>+</sup> 71) | Toluene<br>(NO <sup>+</sup> 92) | Toluene<br>(O <sub>2</sub> <sup>+</sup> 92) | Trichloroethylene<br>(O <sub>2</sub> <sup>+</sup> 130) | Trichloroethylene<br>(O <sub>2</sub> <sup>+</sup> 132) |
|----------------------|---------------------------------|----------------------------------------------------|---------------------------------|----------------------------------|---------------------------------------------|-----------------------------------|------------------------------------------------|------------------------------------------------|--------------------------------------------------|------------------------------------|---------------------------------------------------------|-------------------------------------------|------------------------------------------------|----------------------------------------------|---------------------------------------------------------|----------------------------------------------------|----------------------------------|-----------------------------------------|-----------------------------------------------------|---------------------------------|---------------------------------------------|--------------------------------------------------------|--------------------------------------------------------|
| 0                    | 0.0336                          | 0.0176                                             | 0.00095                         | 0.0241                           | 0.00134                                     | 0.00935                           | 0.0218                                         | 0.0666                                         | 0.601                                            | 0.0818                             | 0.0322                                                  | 0.0194                                    | 0.16                                           | 0.0101                                       | 0.108                                                   | 0.00116                                            | 0.0198                           | 0.103                                   | 0.0857                                              | 0.0323                          | 0.0275                                      | 0.00125                                                | 0.00251                                                |
| 20                   | 0.144                           | 0.132                                              | 0.0124                          | 0.0281                           | 0.0146                                      | 0.0852                            | 0.0576                                         | 0.0982                                         | 0.557                                            | 0.124                              | 0.0908                                                  | 0.0696                                    | 0.25                                           | 0.0588                                       | 0.181                                                   | 0.115                                              | 0.0726                           | 0.181                                   | 0.127                                               | 0.0407                          | 0.0333                                      | 0.011                                                  | 0.0127                                                 |
| 50                   | 0.319                           | 0.33                                               | 0.032                           | 0.0399                           | 0.0329                                      | 0.214                             | 0.113                                          | 0.151                                          | 0.703                                            | 0.227                              | 0.194                                                   | 0.155                                     | 0.389                                          | 0.128                                        | 0.323                                                   | 0.303                                              | 0.151                            | 0.304                                   | 0.203                                               | 0.0607                          | 0.0496                                      | 0.0337                                                 | 0.0322                                                 |
| 100                  | 0.518                           | 0.55                                               | 0.0604                          | 0.0568                           | 0.0636                                      | 0.38                              | 0.218                                          | 0.233                                          | 0.873                                            | 0.401                              | 0.331                                                   | 0.259                                     | 0.575                                          | 0.222                                        | 0.495                                                   | 0.554                                              | 0.33                             | 0.453                                   | 0.313                                               | 0.0886                          | 0.0748                                      | 0.0656                                                 | 0.0674                                                 |
| 200                  | 1                               | 1.04                                               | 0.152                           | 0.115                            | 0.16                                        | 0.703                             | 0.489                                          | 0.472                                          | 1.39                                             | 0.908                              | 0.601                                                   | 0.482                                     | 0.957                                          | 0.416                                        | 0.878                                                   | 1.05                                               | 0.826                            | 0.809                                   | 0.546                                               | 0.163                           | 0.137                                       | 0.159                                                  | 0.16                                                   |
| 300                  | 1.54                            | 1.59                                               | 0.246                           | 0.174                            | 0.257                                       | 1.05                              | 0.734                                          | 0.728                                          | 1.93                                             | 1.45                               | 0.881                                                   | 0.73                                      | 1.42                                           | 0.627                                        | 1.27                                                    | 1.54                                               | 1.3                              | 1.18                                    | 0.794                                               | 0.251                           | 0.205                                       | 0.245                                                  | 0.259                                                  |
| 400                  | 2.03                            | 2.08                                               | 0.331                           | 0.232                            | 0.338                                       | 1.38                              | 1.03                                           | 0.951                                          | 2.53                                             | 1.95                               | 1.17                                                    | 0.952                                     | 1.83                                           | 0.822                                        | 1.62                                                    | 2.02                                               | 1.78                             | 1.54                                    | 1.04                                                | 0.333                           | 0.275                                       | 0.343                                                  | 0.343                                                  |
| 500                  | 2.44                            | 2.58                                               | 0.407                           | 0.271                            | 0.433                                       | 1.69                              | 1.22                                           | 1.16                                           | 3.31                                             | 2.5                                | 1.39                                                    | 1.14                                      | 2.13                                           | 1.01                                         | 2.02                                                    | 2.56                                               | 2.31                             | 1.88                                    | 1.28                                                | 0.397                           | 0.336                                       | 0.444                                                  | 0.411                                                  |
| <b>R<sup>2</sup></b> | <b>0.9990</b>                   | <b>0.9996</b>                                      | <b>0.9976</b>                   | <b>0.9953</b>                    | <b>0.9976</b>                               | <b>0.9994</b>                     | <b>0.9977</b>                                  | <b>0.9980</b>                                  | <b>0.9857</b>                                    | <b>0.9960</b>                      | <b>0.9988</b>                                           | <b>0.9988</b>                             | <b>0.9981</b>                                  | <b>0.9997</b>                                | <b>0.9997</b>                                           | <b>0.9995</b>                                      | <b>0.9963</b>                    | <b>0.9998</b>                           | <b>0.9998</b>                                       | <b>0.9972</b>                   | <b>0.9977</b>                               | <b>0.9969</b>                                          | <b>0.9972</b>                                          |

**Table S6d.** SIFT-MS linearity data for Mix 1 in 50% DMI:50% water across the high concentration range. SIFT-MS response is the headspace concentration in ppmV.

| Concentration Level  | Acetone<br>(NO <sup>+</sup> 88) | Acetonitrile<br>(H <sub>3</sub> O <sup>+</sup> 42) | Benzene<br>(NO <sup>+</sup> 78) | Benzene<br>(NO <sup>+</sup> 108) | Benzene<br>(O <sub>2</sub> <sup>+</sup> 78) | 1-Butanol<br>(NO <sup>+</sup> 73) | Chloroform<br>(O <sub>2</sub> <sup>+</sup> 83) | Chloroform<br>(O <sub>2</sub> <sup>+</sup> 85) | Isooctane<br>(H <sub>3</sub> O <sup>+</sup> 113) | Isooctane<br>(NO <sup>+</sup> 113) | Isopropyl alcohol<br>(H <sub>3</sub> O <sup>+</sup> 43) | Isopropyl alcohol<br>(NO <sup>+</sup> 59) | Methanol<br>(H <sub>3</sub> O <sup>+</sup> 33) | Methyl ethyl ketone<br>(NO <sup>+</sup> 102) | Methyl ethyl ketone<br>(O <sub>2</sub> <sup>+</sup> 72) | Nitromethane<br>(H <sub>3</sub> O <sup>+</sup> 62) | Propanal<br>(NO <sup>+</sup> 57) | Tetrahydrofuran<br>(NO <sup>+</sup> 71) | Tetrahydrofuran<br>(O <sub>2</sub> <sup>+</sup> 71) | Toluene<br>(NO <sup>+</sup> 92) | Toluene<br>(O <sub>2</sub> <sup>+</sup> 92) | Trichloroethylene<br>(O <sub>2</sub> <sup>+</sup> 130) | Trichloroethylene<br>(O <sub>2</sub> <sup>+</sup> 132) |
|----------------------|---------------------------------|----------------------------------------------------|---------------------------------|----------------------------------|---------------------------------------------|-----------------------------------|------------------------------------------------|------------------------------------------------|--------------------------------------------------|------------------------------------|---------------------------------------------------------|-------------------------------------------|------------------------------------------------|----------------------------------------------|---------------------------------------------------------|----------------------------------------------------|----------------------------------|-----------------------------------------|-----------------------------------------------------|---------------------------------|---------------------------------------------|--------------------------------------------------------|--------------------------------------------------------|
| 0                    | 0.0349                          | 0.0102                                             | 0.00058                         | 0.00757                          | 0.00153                                     | 0.00735                           | 0.0192                                         | 0.0393                                         | 0.241                                            | 0.0717                             | 0.0125                                                  | 0.0092                                    | 0.219                                          | 0.0125                                       | 0.111                                                   | 0.00029                                            | 0.0155                           | 0.0973                                  | 0.0599                                              | 0.0103                          | 0.00938                                     | 0.00028                                                | 0.00142                                                |
| 20                   | 0.126                           | 0.081                                              | 0.00307                         | 0.011                            | 0.00306                                     | 0.0471                            | 0.028                                          | 0.0419                                         | 0.25                                             | 0.0802                             | 0.0518                                                  | 0.0434                                    | 0.275                                          | 0.0423                                       | 0.16                                                    | 0.0596                                             | 0.0236                           | 0.142                                   | 0.0952                                              | 0.0153                          | 0.0116                                      | 0.00139                                                | 0.00264                                                |
| 50                   | 0.265                           | 0.191                                              | 0.00819                         | 0.0109                           | 0.00897                                     | 0.102                             | 0.0389                                         | 0.0557                                         | 0.307                                            | 0.11                               | 0.108                                                   | 0.101                                     | 0.398                                          | 0.0889                                       | 0.242                                                   | 0.146                                              | 0.0431                           | 0.216                                   | 0.148                                               | 0.0199                          | 0.0161                                      | 0.00416                                                | 0.00639                                                |
| 100                  | 0.488                           | 0.365                                              | 0.0148                          | 0.0177                           | 0.0165                                      | 0.189                             | 0.0621                                         | 0.0739                                         | 0.347                                            | 0.179                              | 0.208                                                   | 0.199                                     | 0.569                                          | 0.16                                         | 0.393                                                   | 0.288                                              | 0.0704                           | 0.357                                   | 0.232                                               | 0.0274                          | 0.0196                                      | 0.0118                                                 | 0.0116                                                 |
| 200                  | 0.946                           | 0.71                                               | 0.0209                          | 0.0287                           | 0.0318                                      | 0.378                             | 0.131                                          | 0.119                                          | 0.432                                            | 0.291                              | 0.385                                                   | 0.371                                     | 0.924                                          | 0.31                                         | 0.659                                                   | 0.578                                              | 0.129                            | 0.613                                   | 0.396                                               | 0.0427                          | 0.0309                                      | 0.0229                                                 | 0.0232                                                 |
| 300                  | 1.37                            | 1.08                                               | 0.0633                          | 0.0477                           | 0.0665                                      | 0.568                             | 0.217                                          | 0.234                                          | 0.611                                            | 0.403                              | 0.578                                                   | 0.55                                      | 1.25                                           | 0.463                                        | 0.952                                                   | 0.884                                              | 0.3                              | 0.946                                   | 0.6                                                 | 0.0718                          | 0.0543                                      | 0.0499                                                 | 0.0495                                                 |
| 400                  | 1.78                            | 1.41                                               | 0.0848                          | 0.0668                           | 0.0938                                      | 0.746                             | 0.297                                          | 0.301                                          | 0.714                                            | 0.536                              | 0.747                                                   | 0.709                                     | 1.55                                           | 0.598                                        | 1.18                                                    | 1.17                                               | 0.383                            | 1.15                                    | 0.755                                               | 0.0948                          | 0.0724                                      | 0.0702                                                 | 0.0693                                                 |
| 500                  | 2.22                            | 1.79                                               | 0.111                           | 0.0816                           | 0.124                                       | 0.936                             | 0.364                                          | 0.359                                          | 0.877                                            | 0.624                              | 0.915                                                   | 0.895                                     | 1.9                                            | 0.75                                         | 1.48                                                    | 1.43                                               | 0.5                              | 1.44                                    | 0.931                                               | 0.113                           | 0.0896                                      | 0.089                                                  | 0.0851                                                 |
| <b>R<sup>2</sup></b> | <b>0.9997</b>                   | <b>0.9998</b>                                      | <b>0.9660</b>                   | <b>0.9870</b>                    | <b>0.9827</b>                               | <b>0.9999</b>                     | <b>0.9935</b>                                  | <b>0.9807</b>                                  | <b>0.9912</b>                                    | <b>0.9982</b>                      | <b>0.9994</b>                                           | <b>0.9996</b>                             | <b>0.9993</b>                                  | <b>0.9998</b>                                | <b>0.9994</b>                                           | <b>0.9997</b>                                      | <b>0.9791</b>                    | <b>0.9984</b>                           | <b>0.9994</b>                                       | <b>0.9925</b>                   | <b>0.9857</b>                               | <b>0.9851</b>                                          | <b>0.9846</b>                                          |

**Table S6e.** SIFT-MS linearity data for Mix 1 in 75% DMI:25% water across the high concentration range. SIFT-MS response is the headspace concentration in ppmV.

| Concentration Level  | Acetone<br>(NO <sup>+</sup> 88) | Acetonitrile<br>(H <sub>3</sub> O <sup>+</sup> 42) | Benzene<br>(NO <sup>+</sup> 78) | Benzene<br>(NO <sup>+</sup> 108) | Benzene<br>(O <sub>2</sub> <sup>+</sup> 78) | 1-Butanol<br>(NO <sup>+</sup> 73) | Chloroform<br>(O <sub>2</sub> <sup>+</sup> 83) | Chloroform<br>(O <sub>2</sub> <sup>+</sup> 85) | Isooctane<br>(H <sub>3</sub> O <sup>+</sup> 113) | Isooctane<br>(NO <sup>+</sup> 113) | Isopropyl alcohol<br>(H <sub>3</sub> O <sup>+</sup> 43) | Isopropyl alcohol<br>(NO <sup>+</sup> 59) | Methanol<br>(H <sub>3</sub> O <sup>+</sup> 33) | Methyl ethyl ketone<br>(NO <sup>+</sup> 102) | Methyl ethyl ketone<br>(O <sub>2</sub> <sup>+</sup> 72) | Nitromethane<br>(H <sub>3</sub> O <sup>+</sup> 62) | Propanal<br>(NO <sup>+</sup> 57) | Tetrahydrofuran<br>(NO <sup>+</sup> 71) | Tetrahydrofuran<br>(O <sub>2</sub> <sup>+</sup> 71) | Toluene<br>(NO <sup>+</sup> 92) | Toluene<br>(O <sub>2</sub> <sup>+</sup> 92) | Trichloroethylene<br>(O <sub>2</sub> <sup>+</sup> 130) | Trichloroethylene<br>(O <sub>2</sub> <sup>+</sup> 132) |
|----------------------|---------------------------------|----------------------------------------------------|---------------------------------|----------------------------------|---------------------------------------------|-----------------------------------|------------------------------------------------|------------------------------------------------|--------------------------------------------------|------------------------------------|---------------------------------------------------------|-------------------------------------------|------------------------------------------------|----------------------------------------------|---------------------------------------------------------|----------------------------------------------------|----------------------------------|-----------------------------------------|-----------------------------------------------------|---------------------------------|---------------------------------------------|--------------------------------------------------------|--------------------------------------------------------|
| 0                    | 0.0425                          | 0.0149                                             | 0.00056                         | 0.00295                          | 0.00142                                     | 0.0074                            | 0.013                                          | 0.0216                                         | 0.34                                             | 0.106                              | 0.0142                                                  | 0.0176                                    | 0.357                                          | 0.0141                                       | 0.102                                                   | 0.00106                                            | 0.0153                           | 0.0905                                  | 0.0586                                              | 0.0043                          | 0.00363                                     | 0.00044                                                | 0.00098                                                |
| 20                   | 0.131                           | 0.0726                                             | 0.00104                         | 0.00292                          | 0.00173                                     | 0.0253                            | 0.0127                                         | 0.0266                                         | 0.283                                            | 0.111                              | 0.0414                                                  | 0.0529                                    | 0.41                                           | 0.0356                                       | 0.144                                                   | 0.0306                                             | 0.0211                           | 0.125                                   | 0.0807                                              | 0.00558                         | 0.00536                                     | 0.00065                                                | 0.00131                                                |
| 50                   | 0.253                           | 0.155                                              | 0.00223                         | 0.00478                          | 0.00245                                     | 0.0585                            | 0.0144                                         | 0.0237                                         | 0.294                                            | 0.124                              | 0.0883                                                  | 0.0998                                    | 0.552                                          | 0.0677                                       | 0.203                                                   | 0.0757                                             | 0.0236                           | 0.199                                   | 0.122                                               | 0.00711                         | 0.00644                                     | 0.00131                                                | 0.00181                                                |
| 100                  | 0.488                           | 0.304                                              | 0.00482                         | 0.00428                          | 0.00443                                     | 0.111                             | 0.0177                                         | 0.0332                                         | 0.377                                            | 0.136                              | 0.17                                                    | 0.184                                     | 0.748                                          | 0.126                                        | 0.303                                                   | 0.162                                              | 0.0342                           | 0.31                                    | 0.197                                               | 0.00925                         | 0.00769                                     | 0.00194                                                | 0.00392                                                |
| 200                  | 0.921                           | 0.584                                              | 0.00834                         | 0.00752                          | 0.00717                                     | 0.221                             | 0.0269                                         | 0.0426                                         | 0.283                                            | 0.141                              | 0.343                                                   | 0.33                                      | 1.1                                            | 0.238                                        | 0.523                                                   | 0.341                                              | 0.0566                           | 0.545                                   | 0.35                                                | 0.0125                          | 0.0104                                      | 0.00637                                                | 0.00572                                                |
| 300                  | 1.41                            | 0.897                                              | 0.0122                          | 0.0112                           | 0.012                                       | 0.33                              | 0.0373                                         | 0.0565                                         | 0.337                                            | 0.158                              | 0.506                                                   | 0.497                                     | 1.53                                           | 0.363                                        | 0.758                                                   | 0.532                                              | 0.0804                           | 0.787                                   | 0.497                                               | 0.0172                          | 0.012                                       | 0.00707                                                | 0.00827                                                |
| 400                  | 1.83                            | 1.17                                               | 0.0267                          | 0.0215                           | 0.0318                                      | 0.447                             | 0.0824                                         | 0.0879                                         | 0.451                                            | 0.318                              | 0.659                                                   | 0.643                                     | 1.81                                           | 0.478                                        | 1.01                                                    | 0.701                                              | 0.161                            | 1.01                                    | 0.668                                               | 0.0266                          | 0.0197                                      | 0.0186                                                 | 0.018                                                  |
| 500                  | 2.23                            | 1.43                                               | 0.0407                          | 0.029                            | 0.0373                                      | 0.543                             | 0.0931                                         | 0.108                                          | 0.536                                            | 0.361                              | 0.783                                                   | 0.797                                     | 2.19                                           | 0.597                                        | 1.18                                                    | 0.83                                               | 0.216                            | 1.26                                    | 0.819                                               | 0.0314                          | 0.0241                                      | 0.023                                                  | 0.0217                                                 |
| <b>R<sup>2</sup></b> | <b>0.9994</b>                   | <b>0.9995</b>                                      | <b>0.9138</b>                   | <b>0.9196</b>                    | <b>0.9021</b>                               | <b>0.9997</b>                     | <b>0.9077</b>                                  | <b>0.9573</b>                                  | <b>0.6488</b>                                    | <b>0.8483</b>                      | <b>0.9982</b>                                           | <b>0.9998</b>                             | <b>0.9983</b>                                  | <b>0.9998</b>                                | <b>0.9985</b>                                           | <b>0.9980</b>                                      | <b>0.9298</b>                    | <b>0.9998</b>                           | <b>0.9994</b>                                       | <b>0.9791</b>                   | <b>0.9602</b>                               | <b>0.9234</b>                                          | <b>0.9393</b>                                          |

**Table S6f.** SIFT-MS linearity data for Mix 1 in 100% DMI across the high concentration range. SIFT-MS response is the headspace concentration in ppmV.

| Concentration Level  | Acetone<br>(NO <sup>+</sup> 88) | Acetonitrile<br>(H <sub>3</sub> O <sup>+</sup> 42) | Benzene<br>(NO <sup>+</sup> 78) | Benzene<br>(NO <sup>+</sup> 108) | Benzene<br>(O <sub>2</sub> <sup>+</sup> 78) | 1-Butanol<br>(NO <sup>+</sup> 73) | Chloroform<br>(O <sub>2</sub> <sup>+</sup> 83) | Chloroform<br>(O <sub>2</sub> <sup>+</sup> 85) | Isooctane<br>(H <sub>3</sub> O <sup>+</sup> 113) | Isooctane<br>(NO <sup>+</sup> 113) | Isopropyl alcohol<br>(H <sub>3</sub> O <sup>+</sup> 43) | Isopropyl alcohol<br>(NO <sup>+</sup> 59) | Methanol<br>(H <sub>3</sub> O <sup>+</sup> 33) | Methyl ethyl ketone<br>(NO <sup>+</sup> 102) | Methyl ethyl ketone<br>(O <sub>2</sub> <sup>+</sup> 72) | Nitromethane<br>(H <sub>3</sub> O <sup>+</sup> 62) | Propanal<br>(NO <sup>+</sup> 57) | Tetrahydrofuran<br>(NO <sup>+</sup> 71) | Tetrahydrofuran<br>(O <sub>2</sub> <sup>+</sup> 71) | Toluene<br>(NO <sup>+</sup> 92) | Toluene<br>(O <sub>2</sub> <sup>+</sup> 92) | Trichloroethylene<br>(O <sub>2</sub> <sup>+</sup> 130) | Trichloroethylene<br>(O <sub>2</sub> <sup>+</sup> 132) |
|----------------------|---------------------------------|----------------------------------------------------|---------------------------------|----------------------------------|---------------------------------------------|-----------------------------------|------------------------------------------------|------------------------------------------------|--------------------------------------------------|------------------------------------|---------------------------------------------------------|-------------------------------------------|------------------------------------------------|----------------------------------------------|---------------------------------------------------------|----------------------------------------------------|----------------------------------|-----------------------------------------|-----------------------------------------------------|---------------------------------|---------------------------------------------|--------------------------------------------------------|--------------------------------------------------------|
| 0                    | 0.0473                          | 0.0343                                             | 0.00008                         | 0.00108                          | 0.00057                                     | 0.00907                           | 0.00909                                        | 0.152                                          | 1.38                                             | 1.11                               | 0.0199                                                  | 0.0542                                    | 0.445                                          | 0.00847                                      | 0.151                                                   | 0.00091                                            | 0.025                            | 0.0426                                  | 0.134                                               | 0.00095                         | 0.00086                                     | 0.00118                                                | 0.00211                                                |
| 20                   | 0.118                           | 0.0729                                             | 0.0004                          | 0.0013                           | 0.00062                                     | 0.0182                            | 0.00976                                        | 0.126                                          | 1.08                                             | 0.892                              | 0.0421                                                  | 0.0705                                    | 0.549                                          | 0.0219                                       | 0.168                                                   | 0.0164                                             | 0.0247                           | 0.071                                   | 0.132                                               | 0.00111                         | 0.00111                                     | 0.00031                                                | 0.00126                                                |
| 50                   | 0.216                           | 0.132                                              | 0.00069                         | 0.00131                          | 0.0011                                      | 0.0266                            | 0.00895                                        | 0.118                                          | 0.995                                            | 0.825                              | 0.0695                                                  | 0.0947                                    | 0.685                                          | 0.0375                                       | 0.197                                                   | 0.0434                                             | 0.0253                           | 0.115                                   | 0.149                                               | 0.0016                          | 0.00070                                     | 0.00062                                                | 0.00218                                                |
| 100                  | 0.397                           | 0.246                                              | 0.002                           | 0.00181                          | 0.0018                                      | 0.0532                            | 0.0102                                         | 0.111                                          | 0.912                                            | 0.902                              | 0.13                                                    | 0.15                                      | 0.9                                            | 0.0669                                       | 0.266                                                   | 0.085                                              | 0.0279                           | 0.195                                   | 0.207                                               | 0.00236                         | 0.00182                                     | 0.00094                                                | 0.00223                                                |
| 200                  | 0.761                           | 0.441                                              | 0.00302                         | 0.00241                          | 0.00239                                     | 0.0994                            | 0.0142                                         | 0.0973                                         | 0.823                                            | 0.797                              | 0.246                                                   | 0.251                                     | 1.32                                           | 0.135                                        | 0.388                                                   | 0.167                                              | 0.0283                           | 0.33                                    | 0.298                                               | 0.00317                         | 0.00158                                     | 0.00153                                                | 0.00341                                                |
| 300                  | 1.12                            | 0.652                                              | 0.00481                         | 0.0047                           | 0.00404                                     | 0.148                             | 0.0148                                         | 0.0826                                         | 0.605                                            | 0.633                              | 0.35                                                    | 0.354                                     | 1.73                                           | 0.202                                        | 0.518                                                   | 0.25                                               | 0.0342                           | 0.496                                   | 0.376                                               | 0.00366                         | 0.0027                                      | 0.00333                                                | 0.00318                                                |
| 400                  | 1.49                            | 0.849                                              | 0.00693                         | 0.00577                          | 0.00572                                     | 0.196                             | 0.0171                                         | 0.0822                                         | 0.668                                            | 0.593                              | 0.458                                                   | 0.465                                     | 2.12                                           | 0.268                                        | 0.662                                                   | 0.329                                              | 0.0438                           | 0.663                                   | 0.485                                               | 0.00511                         | 0.00392                                     | 0.00405                                                | 0.00489                                                |
| 500                  | 1.88                            | 1.08                                               | 0.00824                         | 0.00703                          | 0.00716                                     | 0.244                             | 0.0231                                         | 0.0738                                         | 0.649                                            | 0.492                              | 0.576                                                   | 0.573                                     | 2.52                                           | 0.344                                        | 0.823                                                   | 0.417                                              | 0.0575                           | 0.863                                   | 0.597                                               | 0.00613                         | 0.00517                                     | 0.00727                                                | 0.0069                                                 |
| <b>R<sup>2</sup></b> | <b>0.9998</b>                   | <b>0.9996</b>                                      | <b>0.9948</b>                   | <b>0.9744</b>                    | <b>0.9870</b>                               | <b>0.9995</b>                     | <b>0.9397</b>                                  | <b>0.8459</b>                                  | <b>0.7414</b>                                    | <b>0.8715</b>                      | <b>0.9997</b>                                           | <b>0.9994</b>                             | <b>0.9995</b>                                  | <b>0.9990</b>                                | <b>0.9970</b>                                           | <b>0.9999</b>                                      | <b>0.8844</b>                    | <b>0.9969</b>                           | <b>0.9947</b>                                       | <b>0.9877</b>                   | <b>0.9312</b>                               | <b>0.8865</b>                                          | <b>0.8927</b>                                          |

**Table S7a.** SIFT-MS linearity data for Mix 2 in 10% DMI:90% water across the low concentration range. SIFT-MS response is the headspace concentration in ppmV.

| Concentration Level   | Acetone<br>(NO <sup>+</sup> 88) | Acetonitrile<br>(H <sub>3</sub> O <sup>+</sup> 42) | Benzene<br>(NO <sup>+</sup> 78) | Benzene<br>(NO <sup>+</sup> 108) | Benzene<br>(O <sub>2</sub> <sup>+</sup> 78) | 1-Butanol<br>(NO <sup>+</sup> 73) | Chloroform<br>(O <sub>2</sub> <sup>+</sup> 83) | Chloroform<br>(O <sub>2</sub> <sup>+</sup> 85) | Isooctane<br>(H <sub>3</sub> O <sup>+</sup> 113) | Isooctane<br>(NO <sup>+</sup> 113) | Isopropyl alcohol<br>(H <sub>3</sub> O <sup>+</sup> 43) | Isopropyl alcohol<br>(NO <sup>+</sup> 59) | Methanol<br>(H <sub>3</sub> O <sup>+</sup> 33) | Methyl ethyl ketone<br>(NO <sup>+</sup> 102) | Methyl ethyl ketone<br>(O <sub>2</sub> <sup>+</sup> 72) | Nitromethane<br>(H <sub>3</sub> O <sup>+</sup> 62) | Propanal<br>(NO <sup>+</sup> 57) | Tetrahydrofuran<br>(NO <sup>+</sup> 71) | Tetrahydrofuran<br>(O <sub>2</sub> <sup>+</sup> 71) | Toluene<br>(NO <sup>+</sup> 92) | Toluene<br>(O <sub>2</sub> <sup>+</sup> 92) | Trichloroethylene<br>(O <sub>2</sub> <sup>+</sup> 130) | Trichloroethylene<br>(O <sub>2</sub> <sup>+</sup> 132) |
|-----------------------|---------------------------------|----------------------------------------------------|---------------------------------|----------------------------------|---------------------------------------------|-----------------------------------|------------------------------------------------|------------------------------------------------|--------------------------------------------------|------------------------------------|---------------------------------------------------------|-------------------------------------------|------------------------------------------------|----------------------------------------------|---------------------------------------------------------|----------------------------------------------------|----------------------------------|-----------------------------------------|-----------------------------------------------------|---------------------------------|---------------------------------------------|--------------------------------------------------------|--------------------------------------------------------|
| 0                     | 0.00751                         | 0.0256                                             | 0.01680                         | 0.0129                           | 0.013                                       | 0.00424                           | 0.0184                                         | 0.0271                                         | 0.854                                            | 0.0443                             | 0.00612                                                 | 0.00459                                   | 0.028                                          | 0.00266                                      | 0.047                                                   | 0.00046                                            | 0.0234                           | 0.039                                   | 0.0226                                              | 0.01950                         | 0.01660                                     | 0.00802                                                | 0.00835                                                |
| 1                     | 0.0114                          | 0.034                                              | 0.157                           | 0.107                            | 0.16400                                     | 0.00763                           | 0.115                                          | 0.117                                          | 0.845                                            | 0.129                              | 0.00846                                                 | 0.00821                                   | 0.0343                                         | 0.00805                                      | 0.06                                                    | 0.00459                                            | 0.0846                           | 0.0521                                  | 0.0319                                              | 0.154                           | 0.132                                       | 0.14400                                                | 0.145                                                  |
| 2                     | 0.0184                          | 0.0397                                             | 0.29200                         | 0.208                            | 0.305                                       | 0.00951                           | 0.215                                          | 0.21                                           | 0.97                                             | 0.214                              | 0.0139                                                  | 0.011                                     | 0.0353                                         | 0.013                                        | 0.0658                                                  | 0.00877                                            | 0.165                            | 0.0593                                  | 0.0382                                              | 0.293                           | 0.25800                                     | 0.27400                                                | 0.273                                                  |
| 3                     | 0.0237                          | 0.0428                                             | 0.447                           | 0.293                            | 0.46                                        | 0.0133                            | 0.323                                          | 0.309                                          | 1.06                                             | 0.32                               | 0.0163                                                  | 0.0125                                    | 0.0381                                         | 0.0188                                       | 0.0728                                                  | 0.0135                                             | 0.263                            | 0.0729                                  | 0.0474                                              | 0.445                           | 0.384                                       | 0.43600                                                | 0.41                                                   |
| 5                     | 0.0358                          | 0.0493                                             | 0.768                           | 0.534                            | 0.821                                       | 0.0177                            | 0.568                                          | 0.525                                          | 1.19                                             | 0.545                              | 0.024                                                   | 0.0187                                    | 0.0413                                         | 0.0299                                       | 0.0952                                                  | 0.0214                                             | 0.481                            | 0.0912                                  | 0.0585                                              | 0.791                           | 0.673                                       | 0.78                                                   | 0.782                                                  |
| 10                    | 0.0678                          | 0.0721                                             | 1.58                            | 1.12                             | 1.66                                        | 0.029                             | 1.13                                           | 1.04                                           | 1.59                                             | 1.02                               | 0.0423                                                  | 0.0339                                    | 0.0507                                         | 0.0596                                       | 0.144                                                   | 0.0432                                             | 0.906                            | 0.15                                    | 0.0955                                              | 1.59                            | 1.38                                        | 1.53                                                   | 1.54                                                   |
| 15                    | 0.0962                          | 0.0935                                             | 2.34                            | 1.62                             | 2.57                                        | 0.0477                            | 1.7                                            | 1.56                                           | 2.35                                             | 1.78                               | 0.061                                                   | 0.0465                                    | 0.0562                                         | 0.0885                                       | 0.203                                                   | 0.0635                                             | 1.58                             | 0.197                                   | 0.146                                               | 2.41                            | 2.09                                        | 2.4                                                    | 2.33                                                   |
| 20                    | 0.132                           | 0.118                                              | 3.08                            | 2.19                             | 3.25                                        | 0.0612                            | 2.2                                            | 2.04                                           | 2.61                                             | 2.16                               | 0.0764                                                  | 0.0597                                    | 0.0654                                         | 0.12                                         | 0.255                                                   | 0.0899                                             | 1.95                             | 0.257                                   | 0.184                                               | 3.15                            | 2.72                                        | 3.14                                                   | 3.01                                                   |
| <i>R</i> <sup>2</sup> | <b>0.9989</b>                   | <b>0.9971</b>                                      | <b>0.9997</b>                   | <b>0.9994</b>                    | <b>0.9987</b>                               | <b>0.9952</b>                     | <b>0.9995</b>                                  | <b>0.9998</b>                                  | <b>0.9836</b>                                    | <b>0.9940</b>                      | <b>0.9989</b>                                           | <b>0.9989</b>                             | <b>0.9800</b>                                  | <b>0.9996</b>                                | <b>0.9982</b>                                           | <b>0.9985</b>                                      | <b>0.9950</b>                    | <b>0.9991</b>                           | <b>0.9967</b>                                       | <b>0.9997</b>                   | <b>0.9996</b>                               | <b>0.9995</b>                                          | <b>0.9992</b>                                          |

**Table S7b.** SIFT-MS linearity data for Mix 2 in 100% DMI across the high concentration range. SIFT-MS response is the headspace concentration in ppmV.

| Concentration Level  | Acetone<br>(NO <sup>+</sup> 88) | Acetonitrile<br>(H <sub>3</sub> O <sup>+</sup> 42) | Benzene<br>(NO <sup>+</sup> 78) | Benzene<br>(NO <sup>+</sup> 108) | Benzene<br>(O <sub>2</sub> <sup>+</sup> 78) | 1-Butanol<br>(NO <sup>+</sup> 73) | Chloroform<br>(O <sub>2</sub> <sup>+</sup> 83) | Chloroform<br>(O <sub>2</sub> <sup>+</sup> 85) | Isooctane<br>(H <sub>3</sub> O <sup>+</sup> 113) | Isooctane<br>(NO <sup>+</sup> 113) | Isopropyl alcohol<br>(H <sub>3</sub> O <sup>+</sup> 43) | Isopropyl alcohol<br>(NO <sup>+</sup> 59) | Methanol<br>(H <sub>3</sub> O <sup>+</sup> 33) | Methyl ethyl ketone<br>(NO <sup>+</sup> 102) | Methyl ethyl ketone<br>(O <sub>2</sub> <sup>+</sup> 72) | Nitromethane<br>(H <sub>3</sub> O <sup>+</sup> 62) | Propanal<br>(NO <sup>+</sup> 57) | Tetrahydrofuran<br>(NO <sup>+</sup> 71) | Tetrahydrofuran<br>(O <sub>2</sub> <sup>+</sup> 71) | Toluene<br>(NO <sup>+</sup> 92) | Toluene<br>(O <sub>2</sub> <sup>+</sup> 92) | Trichloroethylene<br>(O <sub>2</sub> <sup>+</sup> 130) | Trichloroethylene<br>(O <sub>2</sub> <sup>+</sup> 132) |
|----------------------|---------------------------------|----------------------------------------------------|---------------------------------|----------------------------------|---------------------------------------------|-----------------------------------|------------------------------------------------|------------------------------------------------|--------------------------------------------------|------------------------------------|---------------------------------------------------------|-------------------------------------------|------------------------------------------------|----------------------------------------------|---------------------------------------------------------|----------------------------------------------------|----------------------------------|-----------------------------------------|-----------------------------------------------------|---------------------------------|---------------------------------------------|--------------------------------------------------------|--------------------------------------------------------|
| 0                    | 0.0518                          | 0.0442                                             | 0.00207                         | 0.00033                          | 0.00306                                     | 0.00632                           | 0.012                                          | 0.134                                          | 1.41                                             | 0.964                              | 0.0282                                                  | 0.0341                                    | 0.462                                          | 0.0113                                       | 0.137                                                   | 0.00022                                            | 0.0232                           | 0.0422                                  | 0.11                                                | 0.00115                         | 0.00080                                     | 0.00091                                                | 0.00072                                                |
| 20                   | 0.111                           | 0.0813                                             | 0.024                           | 0.0143                           | 0.02080                                     | 0.0123                            | 0.0184                                         | 0.137                                          | 1.34                                             | 0.885                              | 0.0477                                                  | 0.0552                                    | 0.51                                           | 0.0363                                       | 0.194                                                   | 0.0164                                             | 0.0457                           | 0.11                                    | 0.15                                                | 0.0128                          | 0.00916                                     | 0.00921                                                | 0.0112                                                 |
| 50                   | 0.232                           | 0.143                                              | 0.06470                         | 0.0294                           | 0.0625                                      | 0.0195                            | 0.029                                          | 0.122                                          | 1.19                                             | 0.776                              | 0.0806                                                  | 0.0885                                    | 0.605                                          | 0.0803                                       | 0.283                                                   | 0.0435                                             | 0.0867                           | 0.227                                   | 0.22                                                | 0.0297                          | 0.02420                                     | 0.02170                                                | 0.0227                                                 |
| 100                  | 0.412                           | 0.245                                              | 0.0934                          | 0.059                            | 0.0969                                      | 0.0372                            | 0.0427                                         | 0.112                                          | 0.917                                            | 0.663                              | 0.129                                                   | 0.144                                     | 0.726                                          | 0.148                                        | 0.428                                                   | 0.0863                                             | 0.141                            | 0.402                                   | 0.324                                               | 0.0484                          | 0.0371                                      | 0.03730                                                | 0.0375                                                 |
| 200                  | 0.769                           | 0.447                                              | 0.207                           | 0.127                            | 0.212                                       | 0.0654                            | 0.0857                                         | 0.149                                          | 1.06                                             | 0.787                              | 0.25                                                    | 0.242                                     | 0.927                                          | 0.29                                         | 0.738                                                   | 0.175                                              | 0.264                            | 0.755                                   | 0.573                                               | 0.0977                          | 0.0909                                      | 0.0874                                                 | 0.0863                                                 |
| 300                  | 1.16                            | 0.648                                              | 0.337                           | 0.209                            | 0.337                                       | 0.0989                            | 0.126                                          | 0.17                                           | 0.838                                            | 0.728                              | 0.372                                                   | 0.349                                     | 1.09                                           | 0.431                                        | 1.04                                                    | 0.255                                              | 0.435                            | 1.16                                    | 0.814                                               | 0.167                           | 0.136                                       | 0.14                                                   | 0.14                                                   |
| 400                  | 1.53                            | 0.836                                              | 0.436                           | 0.278                            | 0.477                                       | 0.131                             | 0.167                                          | 0.195                                          | 0.862                                            | 0.7                                | 0.473                                                   | 0.456                                     | 1.28                                           | 0.589                                        | 1.35                                                    | 0.339                                              | 0.582                            | 1.53                                    | 1.07                                                | 0.229                           | 0.202                                       | 0.19                                                   | 0.176                                                  |
| 500                  | 1.91                            | 1.04                                               | 0.596                           | 0.384                            | 0.63                                        | 0.167                             | 0.22                                           | 0.248                                          | 0.892                                            | 0.734                              | 0.577                                                   | 0.569                                     | 1.48                                           | 0.75                                         | 1.64                                                    | 0.422                                              | 0.785                            | 1.96                                    | 1.35                                                | 0.311                           | 0.264                                       | 0.251                                                  | 0.246                                                  |
| <b>R<sup>2</sup></b> | <b>0.9999</b>                   | <b>0.9999</b>                                      | <b>0.9943</b>                   | <b>0.9932</b>                    | <b>0.9939</b>                               | <b>0.9989</b>                     | <b>0.9958</b>                                  | <b>0.8495</b>                                  | <b>0.6504</b>                                    | <b>0.3596</b>                      | <b>0.9992</b>                                           | <b>0.9997</b>                             | <b>0.9957</b>                                  | <b>0.9991</b>                                | <b>0.9999</b>                                           | <b>0.9998</b>                                      | <b>0.9926</b>                    | <b>0.9992</b>                           | <b>0.9988</b>                                       | <b>0.9912</b>                   | <b>0.9923</b>                               | <b>0.9959</b>                                          | <b>0.9933</b>                                          |

**Table S8a.** SIFT-MS linearity data for Mix 1 in 5% DMSO:95% water across the high concentration range. SIFT-MS response is the headspace concentration in ppmV.

| Concentration Level   | Acetone<br>(NO <sup>+</sup> 88) | Acetonitrile<br>(H <sub>3</sub> O <sup>+</sup> 42) | Benzene<br>(NO <sup>+</sup> 78) | Benzene<br>(NO <sup>+</sup> 108) | Benzene<br>(O <sub>2</sub> <sup>+</sup> 78) | 1-Butanol<br>(NO <sup>+</sup> 73) | Chloroform<br>(O <sub>2</sub> <sup>+</sup> 83) | Chloroform<br>(O <sub>2</sub> <sup>+</sup> 85) | Isooctane<br>(H <sub>3</sub> O <sup>+</sup> 113) | Isooctane<br>(NO <sup>+</sup> 113) | Isopropyl alcohol<br>(H <sub>3</sub> O <sup>+</sup> 43) | Isopropyl alcohol<br>(NO <sup>+</sup> 59) | Methanol<br>(H <sub>3</sub> O <sup>+</sup> 33) | Methyl ethyl ketone<br>(NO <sup>+</sup> 102) | Methyl ethyl ketone<br>(O <sub>2</sub> <sup>+</sup> 72) | Nitromethane<br>(H <sub>3</sub> O <sup>+</sup> 62) | Propanal<br>(NO <sup>+</sup> 57) | Tetrahydrofuran<br>(NO <sup>+</sup> 71) | Tetrahydrofuran<br>(O <sub>2</sub> <sup>+</sup> 71) | Toluene<br>(NO <sup>+</sup> 92) | Toluene<br>(O <sub>2</sub> <sup>+</sup> 92) | Trichloroethylene<br>(O <sub>2</sub> <sup>+</sup> 130) | Trichloroethylene<br>(O <sub>2</sub> <sup>+</sup> 132) |
|-----------------------|---------------------------------|----------------------------------------------------|---------------------------------|----------------------------------|---------------------------------------------|-----------------------------------|------------------------------------------------|------------------------------------------------|--------------------------------------------------|------------------------------------|---------------------------------------------------------|-------------------------------------------|------------------------------------------------|----------------------------------------------|---------------------------------------------------------|----------------------------------------------------|----------------------------------|-----------------------------------------|-----------------------------------------------------|---------------------------------|---------------------------------------------|--------------------------------------------------------|--------------------------------------------------------|
| 0                     | 0.0138                          | 0.130                                              | 1.19                            | 0.173                            | 0.914                                       | 0.00433                           | 0.0378                                         | 0.0336                                         | 0.187                                            | 0.00526                            | 0.0188                                                  | 0.0151                                    | 0.00937                                        | 0.00088                                      | 0.0062                                                  | 0.00028                                            | 0.00384                          | 0.00744                                 | 0.0153                                              | 0.00201                         | 0.0016                                      | 0.00457                                                | 0.00266                                                |
| 20                    | 0.145                           | 0.192                                              | 1.14                            | 0.168                            | 0.880                                       | 0.135                             | 0.126                                          | 0.105                                          | 0.224                                            | 0.0436                             | 0.0767                                                  | 0.0755                                    | 0.0848                                         | 0.0729                                       | 0.123                                                   | 0.111                                              | 0.0469                           | 0.0831                                  | 0.0635                                              | 0.0366                          | 0.0306                                      | 0.0368                                                 | 0.0354                                                 |
| 50                    | 0.357                           | 0.345                                              | 1.31                            | 0.237                            | 1.01                                        | 0.345                             | 0.247                                          | 0.236                                          | 0.287                                            | 0.102                              | 0.178                                                   | 0.183                                     | 0.213                                          | 0.186                                        | 0.294                                                   | 0.264                                              | 0.107                            | 0.209                                   | 0.147                                               | 0.0896                          | 0.0777                                      | 0.0802                                                 | 0.0846                                                 |
| 100                   | 0.701                           | 0.586                                              | 1.37                            | 0.288                            | 1.10                                        | 0.686                             | 0.462                                          | 0.422                                          | 0.405                                            | 0.199                              | 0.359                                                   | 0.349                                     | 0.408                                          | 0.364                                        | 0.630                                                   | 0.537                                              | 0.226                            | 0.412                                   | 0.263                                               | 0.186                           | 0.151                                       | 0.153                                                  | 0.166                                                  |
| 200                   | 1.37                            | 1.11                                               | 1.63                            | 0.497                            | 1.40                                        | 1.31                              | 1.34                                           | 1.25                                           | 0.836                                            | 0.693                              | 0.670                                                   | 0.661                                     | 0.766                                          | 0.717                                        | 1.23                                                    | 1.06                                               | 0.678                            | 0.834                                   | 0.549                                               | 0.569                           | 0.482                                       | 0.545                                                  | 0.522                                                  |
| 300                   | 2.09                            | 1.61                                               | 2.29                            | 0.766                            | 1.96                                        | 2.03                              | 2.04                                           | 1.86                                           | 1.27                                             | 1.02                               | 1.03                                                    | 1.01                                      | 1.17                                           | 1.10                                         | 1.90                                                    | 1.64                                               | 1.03                             | 1.26                                    | 0.862                                               | 0.862                           | 0.717                                       | 0.818                                                  | 0.789                                                  |
| 400                   | 2.82                            | 2.15                                               | 2.63                            | 0.964                            | 2.39                                        | 2.71                              | 2.72                                           | 2.48                                           | 1.63                                             | 1.43                               | 1.39                                                    | 1.38                                      | 1.61                                           | 1.48                                         | 2.53                                                    | 2.18                                               | 1.42                             | 1.68                                    | 1.15                                                | 1.12                            | 0.980                                       | 1.15                                                   | 1.11                                                   |
| 500                   | 3.39                            | 2.66                                               | 2.73                            | 1.23                             | 2.61                                        | 3.27                              | 3.50                                           | 3.26                                           | 1.90                                             | 1.75                               | 1.63                                                    | 1.65                                      | 1.95                                           | 1.76                                         | 3.16                                                    | 2.63                                               | 1.82                             | 2.12                                    | 1.39                                                | 1.37                            | 1.23                                        | 1.40                                                   | 1.36                                                   |
| <i>R</i> <sup>2</sup> | <b>0.9994</b>                   | <b>0.9996</b>                                      | <b>0.9685</b>                   | <b>0.9917</b>                    | <b>0.9840</b>                               | <b>0.9993</b>                     | <b>0.9960</b>                                  | <b>0.9954</b>                                  | <b>0.9940</b>                                    | <b>0.9943</b>                      | <b>0.9982</b>                                           | <b>0.9991</b>                             | <b>0.9993</b>                                  | <b>0.9989</b>                                | <b>0.9999</b>                                           | <b>0.9993</b>                                      | <b>0.9959</b>                    | <b>0.9999</b>                           | <b>0.9990</b>                                       | <b>0.9953</b>                   | <b>0.9959</b>                               | <b>0.9937</b>                                          | <b>0.9954</b>                                          |

**Table S8b.** SIFT-MS linearity data for Mix 1 in 10% DMSO:90% water across the high concentration range. SIFT-MS response is the headspace concentration in ppmV.

| Concentration Level  | Acetone<br>(NO <sup>+</sup> 88) | Acetonitrile<br>(H <sub>3</sub> O <sup>+</sup> 42) | Benzene<br>(NO <sup>+</sup> 78) | Benzene<br>(NO <sup>+</sup> 108) | Benzene<br>(O <sub>2</sub> <sup>+</sup> 78) | 1-Butanol<br>(NO <sup>+</sup> 73) | Chloroform<br>(O <sub>2</sub> <sup>+</sup> 83) | Chloroform<br>(O <sub>2</sub> <sup>+</sup> 85) | Isooctane<br>(H <sub>3</sub> O <sup>+</sup> 113) | Isooctane<br>(NO <sup>+</sup> 113) | Isopropyl alcohol<br>(H <sub>3</sub> O <sup>+</sup> 43) | Isopropyl alcohol<br>(NO <sup>+</sup> 59) | Methanol<br>(H <sub>3</sub> O <sup>+</sup> 33) | Methyl ethyl ketone<br>(NO <sup>+</sup> 102) | Methyl ethyl ketone<br>(O <sub>2</sub> <sup>+</sup> 72) | Nitromethane<br>(H <sub>3</sub> O <sup>+</sup> 62) | Propanal<br>(NO <sup>+</sup> 57) | Tetrahydrofuran<br>(NO <sup>+</sup> 71) | Tetrahydrofuran<br>(O <sub>2</sub> <sup>+</sup> 71) | Toluene<br>(NO <sup>+</sup> 92) | Toluene<br>(O <sub>2</sub> <sup>+</sup> 92) | Trichloroethylene<br>(O <sub>2</sub> <sup>+</sup> 130) | Trichloroethylene<br>(O <sub>2</sub> <sup>+</sup> 132) |
|----------------------|---------------------------------|----------------------------------------------------|---------------------------------|----------------------------------|---------------------------------------------|-----------------------------------|------------------------------------------------|------------------------------------------------|--------------------------------------------------|------------------------------------|---------------------------------------------------------|-------------------------------------------|------------------------------------------------|----------------------------------------------|---------------------------------------------------------|----------------------------------------------------|----------------------------------|-----------------------------------------|-----------------------------------------------------|---------------------------------|---------------------------------------------|--------------------------------------------------------|--------------------------------------------------------|
| 0                    | 0.0138                          | 0.0366                                             | 1.39                            | 0.193                            | 0.991                                       | 0.00484                           | 0.0592                                         | 0.0462                                         | 0.339                                            | 0.00795                            | 0.0078                                                  | 0.00455                                   | 0.00698                                        | 0.00187                                      | 0.00683                                                 | 0.00128                                            | 0.0077                           | 0.00494                                 | 0.0261                                              | 0.00298                         | 0.00316                                     | 0.00509                                                | 0.00471                                                |
| 20                   | 0.150                           | 0.141                                              | 1.36                            | 0.215                            | 1.02                                        | 0.129                             | 0.140                                          | 0.119                                          | 0.358                                            | 0.0468                             | 0.0768                                                  | 0.0725                                    | 0.0892                                         | 0.0735                                       | 0.131                                                   | 0.107                                              | 0.0525                           | 0.0828                                  | 0.0762                                              | 0.0331                          | 0.0289                                      | 0.0381                                                 | 0.0359                                                 |
| 50                   | 0.363                           | 0.295                                              | 1.29                            | 0.228                            | 0.988                                       | 0.324                             | 0.247                                          | 0.227                                          | 0.421                                            | 0.106                              | 0.173                                                   | 0.170                                     | 0.209                                          | 0.175                                        | 0.305                                                   | 0.265                                              | 0.117                            | 0.203                                   | 0.142                                               | 0.0811                          | 0.0661                                      | 0.0823                                                 | 0.0763                                                 |
| 100                  | 0.703                           | 0.540                                              | 1.60                            | 0.312                            | 1.23                                        | 0.633                             | 0.417                                          | 0.391                                          | 0.563                                            | 0.213                              | 0.341                                                   | 0.348                                     | 0.421                                          | 0.347                                        | 0.592                                                   | 0.520                                              | 0.227                            | 0.407                                   | 0.275                                               | 0.166                           | 0.131                                       | 0.150                                                  | 0.147                                                  |
| 200                  | 1.39                            | 1.04                                               | 2.00                            | 0.514                            | 1.66                                        | 1.22                              | 1.20                                           | 1.08                                           | 1.00                                             | 0.668                              | 0.652                                                   | 0.649                                     | 0.807                                          | 0.694                                        | 1.20                                                    | 1.02                                               | 0.661                            | 0.802                                   | 0.551                                               | 0.460                           | 0.395                                       | 0.475                                                  | 0.467                                                  |
| 300                  | 2.17                            | 1.59                                               | 2.43                            | 0.747                            | 2.02                                        | 1.89                              | 1.82                                           | 1.67                                           | 1.35                                             | 1.02                               | 1.02                                                    | 0.987                                     | 1.19                                           | 1.04                                         | 1.84                                                    | 1.60                                               | 1.03                             | 1.24                                    | 0.826                                               | 0.732                           | 0.631                                       | 0.744                                                  | 0.725                                                  |
| 400                  | 2.80                            | 2.11                                               | 2.56                            | 0.882                            | 2.22                                        | 2.48                              | 2.46                                           | 2.23                                           | 1.88                                             | 1.44                               | 1.32                                                    | 1.31                                      | 1.58                                           | 1.43                                         | 2.45                                                    | 2.09                                               | 1.43                             | 1.64                                    | 1.11                                                | 0.987                           | 0.851                                       | 1.02                                                   | 1.01                                                   |
| 500                  | 3.41                            | 2.55                                               | 2.72                            | 1.07                             | 2.46                                        | 3.00                              | 2.93                                           | 2.70                                           | 2.23                                             | 1.79                               | 1.58                                                    | 1.60                                      | 1.90                                           | 1.72                                         | 3.02                                                    | 2.58                                               | 1.76                             | 2.00                                    | 1.38                                                | 1.19                            | 1.06                                        | 1.27                                                   | 1.26                                                   |
| <b>R<sup>2</sup></b> | <b>0.9991</b>                   | <b>0.9995</b>                                      | <b>0.9593</b>                   | <b>0.9943</b>                    | <b>0.9829</b>                               | <b>0.9992</b>                     | <b>0.9948</b>                                  | <b>0.9960</b>                                  | <b>0.9929</b>                                    | <b>0.9950</b>                      | <b>0.9985</b>                                           | <b>0.9996</b>                             | <b>0.9991</b>                                  | <b>0.9994</b>                                | <b>0.9998</b>                                           | <b>0.9996</b>                                      | <b>0.9960</b>                    | <b>0.9996</b>                           | <b>0.9997</b>                                       | <b>0.9963</b>                   | <b>0.9958</b>                               | <b>0.9951</b>                                          | <b>0.9949</b>                                          |



**Table S8c.** SIFT-MS linearity data for Mix 1 in 25% DMSO:75% water across the high concentration range. SIFT-MS response is the headspace concentration in ppmV.

| Concentration Level  | Acetone<br>(NO <sup>+</sup> 88) | Acetonitrile<br>(H <sub>3</sub> O <sup>+</sup> 42) | Benzene<br>(NO <sup>+</sup> 78) | Benzene<br>(NO <sup>+</sup> 108) | Benzene<br>(O <sub>2</sub> <sup>+</sup> 78) | 1-Butanol<br>(NO <sup>+</sup> 73) | Chloroform<br>(O <sub>2</sub> <sup>+</sup> 83) | Chloroform<br>(O <sub>2</sub> <sup>+</sup> 85) | Isooctane<br>(H <sub>3</sub> O <sup>+</sup> 113) | Isooctane<br>(NO <sup>+</sup> 113) | Isopropyl alcohol<br>(H <sub>3</sub> O <sup>+</sup> 43) | Isopropyl alcohol<br>(NO <sup>+</sup> 59) | Methanol<br>(H <sub>3</sub> O <sup>+</sup> 33) | Methyl ethyl ketone<br>(NO <sup>+</sup> 102) | Methyl ethyl ketone<br>(O <sub>2</sub> <sup>+</sup> 72) | Nitromethane<br>(H <sub>3</sub> O <sup>+</sup> 62) | Propanal<br>(NO <sup>+</sup> 57) | Tetrahydrofuran<br>(NO <sup>+</sup> 71) | Tetrahydrofuran<br>(O <sub>2</sub> <sup>+</sup> 71) | Toluene<br>(NO <sup>+</sup> 92) | Toluene<br>(O <sub>2</sub> <sup>+</sup> 92) | Trichloroethylene<br>(O <sub>2</sub> <sup>+</sup> 130) | Trichloroethylene<br>(O <sub>2</sub> <sup>+</sup> 132) |
|----------------------|---------------------------------|----------------------------------------------------|---------------------------------|----------------------------------|---------------------------------------------|-----------------------------------|------------------------------------------------|------------------------------------------------|--------------------------------------------------|------------------------------------|---------------------------------------------------------|-------------------------------------------|------------------------------------------------|----------------------------------------------|---------------------------------------------------------|----------------------------------------------------|----------------------------------|-----------------------------------------|-----------------------------------------------------|---------------------------------|---------------------------------------------|--------------------------------------------------------|--------------------------------------------------------|
| 0                    | 0.0226                          | 0.0171                                             | 2.71                            | 0.387                            | 2.01                                        | 0.00509                           | 0.125                                          | 0.0948                                         | 0.785                                            | 0.0102                             | 0.0089                                                  | 0.00482                                   | 0.00819                                        | 0.00235                                      | 0.0127                                                  | 0.00174                                            | 0.00959                          | 0.00556                                 | 0.0615                                              | 0.00441                         | 0.00438                                     | 0.00689                                                | 0.00613                                                |
| 20                   | 0.167                           | 0.121                                              | 2.75                            | 0.394                            | 2.01                                        | 0.109                             | 0.184                                          | 0.149                                          | 0.798                                            | 0.0863                             | 0.0744                                                  | 0.0675                                    | 0.098                                          | 0.0671                                       | 0.128                                                   | 0.102                                              | 0.0849                           | 0.0805                                  | 0.108                                               | 0.0282                          | 0.0247                                      | 0.0307                                                 | 0.0343                                                 |
| 50                   | 0.400                           | 0.275                                              | 2.48                            | 0.385                            | 1.85                                        | 0.262                             | 0.273                                          | 0.237                                          | 0.855                                            | 0.202                              | 0.174                                                   | 0.170                                     | 0.222                                          | 0.170                                        | 0.299                                                   | 0.254                                              | 0.208                            | 0.204                                   | 0.176                                               | 0.0654                          | 0.0541                                      | 0.0767                                                 | 0.0698                                                 |
| 100                  | 0.748                           | 0.540                                              | 7.63                            | 1.42                             | 6.93                                        | 0.534                             | 0.421                                          | 0.382                                          | 1.01                                             | 0.376                              | 0.336                                                   | 0.327                                     | 0.446                                          | 0.323                                        | 0.574                                                   | 0.510                                              | 0.387                            | 0.402                                   | 0.308                                               | 0.119                           | 0.099                                       | 0.140                                                  | 0.128                                                  |
| 200                  | 1.49                            | 1.05                                               | 4.76                            | 0.828                            | 3.59                                        | 1.03                              | 0.87                                           | 0.800                                          | 1.73                                             | 0.903                              | 0.672                                                   | 0.656                                     | 0.889                                          | 0.659                                        | 1.13                                                    | 0.968                                              | 0.884                            | 0.785                                   | 0.573                                               | 0.287                           | 0.238                                       | 0.330                                                  | 0.309                                                  |
| 300                  | 2.27                            | 1.71                                               | 2.72                            | 0.650                            | 2.21                                        | 1.52                              | 1.21                                           | 1.10                                           | 1.94                                             | 1.16                               | 1.01                                                    | 1.01                                      | 1.32                                           | 1.02                                         | 1.75                                                    | 1.48                                               | 1.11                             | 1.22                                    | 0.858                                               | 0.425                           | 0.344                                       | 0.459                                                  | 0.456                                                  |
| 400                  | 2.80                            | 1.96                                               | 3.90                            | 0.906                            | 3.04                                        | 1.91                              | 1.60                                           | 1.45                                           | 2.38                                             | 1.84                               | 1.21                                                    | 1.22                                      | 1.63                                           | 1.25                                         | 2.21                                                    | 1.87                                               | 1.65                             | 1.52                                    | 1.07                                                | 0.571                           | 0.484                                       | 0.690                                                  | 0.644                                                  |
| 500                  | 3.56                            | 2.54                                               | 3.75                            | 1.04                             | 3.07                                        | 2.43                              | 2.08                                           | 1.93                                           | 2.78                                             | 2.30                               | 1.56                                                    | 1.56                                      | 2.14                                           | 1.61                                         | 2.78                                                    | 2.29                                               | 2.20                             | 1.96                                    | 1.33                                                | 0.721                           | 0.614                                       | 0.844                                                  | 0.816                                                  |
| <b>R<sup>2</sup></b> | <b>0.9985</b>                   | <b>0.9943</b>                                      | <b>0.0028</b>                   | <b>0.2291</b>                    | <b>0.0024</b>                               | <b>0.9987</b>                     | <b>0.9971</b>                                  | <b>0.9961</b>                                  | <b>0.9865</b>                                    | <b>0.9919</b>                      | <b>0.9969</b>                                           | <b>0.9975</b>                             | <b>0.9981</b>                                  | <b>0.9983</b>                                | <b>0.9993</b>                                           | <b>0.9984</b>                                      | <b>0.9920</b>                    | <b>0.9989</b>                           | <b>0.9991</b>                                       | <b>0.9989</b>                   | <b>0.9978</b>                               | <b>0.9960</b>                                          | <b>0.9974</b>                                          |

**Table S9.** SIFT-MS linearity data for Mix 1 in 5% methanol:95% water across the high concentration range. SIFT-MS response is the headspace concentration in ppmV. Note that acetonitrile and nitromethane are measured using different product ions compared to other diluent solvents, and that trichloroethylene was not measurable in methanol.

| Concentration Level  | Acetone<br>(NO <sup>+</sup> 88) | Acetonitrile<br>(NO <sup>+</sup> 71) | Benzene<br>(NO <sup>+</sup> 78) | Benzene<br>(NO <sup>+</sup> 108) | 1-Butanol<br>(NO <sup>+</sup> 73) | Isooctane<br>(NO <sup>+</sup> 113) | Isopropyl alcohol<br>(NO <sup>+</sup> 59) | Methyl ethyl ketone<br>(NO <sup>+</sup> 102) | Nitromethane<br>(NO <sup>+</sup> 91) | Propanal<br>(NO <sup>+</sup> 57) | Tetrahydrofuran<br>(NO <sup>+</sup> 71) | Toluene<br>(NO <sup>+</sup> 92) |
|----------------------|---------------------------------|--------------------------------------|---------------------------------|----------------------------------|-----------------------------------|------------------------------------|-------------------------------------------|----------------------------------------------|--------------------------------------|----------------------------------|-----------------------------------------|---------------------------------|
| 0                    | 0.0185                          | 0.201                                | 0.0259                          | 0.00379                          | 0.0356                            | 0.00201                            | 0.00486                                   | 0.0271                                       | 0.0195                               | 0.00802                          | 0.0161                                  | 0.00681                         |
| 20                   | 0.165                           | 1.64                                 | 0.0726                          | 0.0489                           | 0.0871                            | 0.114                              | 0.0608                                    | 0.0952                                       | 0.163                                | 0.114                            | 0.131                                   | 0.0639                          |
| 50                   | 0.395                           | 3.86                                 | 0.139                           | 0.106                            | 0.164                             | 0.278                              | 0.143                                     | 0.199                                        | 0.361                                | 0.263                            | 0.309                                   | 0.144                           |
| 100                  | 0.77                            | 7.26                                 | 0.269                           | 0.206                            | 0.293                             | 0.577                              | 0.281                                     | 0.362                                        | 0.725                                | 0.54                             | 0.58                                    | 0.283                           |
| 200                  | 1.48                            | 14.3                                 | 0.556                           | 0.438                            | 0.552                             | 1.2                                | 0.547                                     | 0.689                                        | 1.43                                 | 1.1                              | 1.14                                    | 0.599                           |
| 300                  | 2.18                            | 21.1                                 | 0.805                           | 0.642                            | 0.784                             | 1.78                               | 0.805                                     | 1.02                                         | 2.09                                 | 1.63                             | 1.69                                    | 0.886                           |
| 400                  | 2.94                            | 27.8                                 | 1.09                            | 0.881                            | 1.05                              | 2.43                               | 1.07                                      | 1.33                                         | 2.76                                 | 2.24                             | 2.22                                    | 1.18                            |
| 500                  | 3.55                            | 35                                   | 1.41                            | 1.1                              | 1.33                              | 3.06                               | 1.35                                      | 1.68                                         | 3.31                                 | 2.8                              | 2.8                                     | 1.52                            |
| <b>R<sup>2</sup></b> | <b>0.9995</b>                   | <b>0.9999</b>                        | <b>0.9987</b>                   | <b>0.9996</b>                    | <b>0.9996</b>                     | <b>0.9997</b>                      | <b>0.9999</b>                             | <b>0.9999</b>                                | <b>0.9988</b>                        | <b>0.9997</b>                    | <b>0.9999</b>                           | <b>0.9994</b>                   |

**Table S10.** SIFT-MS linearity data for Mix 1 in 5% triacetin:95% water across the high concentration range. SIFT-MS response is the headspace concentration in ppmV.

| Concentration Level  | Acetone<br>(NO <sup>+</sup> 88) | Acetonitrile<br>(H <sub>3</sub> O <sup>+</sup> 42) | Benzene<br>(NO <sup>+</sup> 78) | Benzene<br>(NO <sup>+</sup> 108) | Benzene<br>(O <sub>2</sub> <sup>+</sup> 78) | 1-Butanol<br>(NO <sup>+</sup> 73) | Chloroform<br>(O <sub>2</sub> <sup>+</sup> 83) | Chloroform<br>(O <sub>2</sub> <sup>+</sup> 85) | Isooctane<br>(H <sub>3</sub> O <sup>+</sup> 113) | Isooctane<br>(NO <sup>+</sup> 113) | Isopropyl alcohol<br>(H <sub>3</sub> O <sup>+</sup> 43) | Isopropyl alcohol<br>(NO <sup>+</sup> 59) | Methanol<br>(H <sub>3</sub> O <sup>+</sup> 33) | Methyl ethyl ketone<br>(NO <sup>+</sup> 102) | Methyl ethyl ketone<br>(O <sub>2</sub> <sup>+</sup> 72) | Nitromethane<br>(H <sub>3</sub> O <sup>+</sup> 62) | Propanal<br>(NO <sup>+</sup> 57) | Tetrahydrofuran<br>(NO <sup>+</sup> 71) | Tetrahydrofuran<br>(O <sub>2</sub> <sup>+</sup> 71) | Toluene<br>(NO <sup>+</sup> 92) | Toluene<br>(O <sub>2</sub> <sup>+</sup> 92) | Trichloroethylene<br>(O <sub>2</sub> <sup>+</sup> 130) | Trichloroethylene<br>(O <sub>2</sub> <sup>+</sup> 132) |
|----------------------|---------------------------------|----------------------------------------------------|---------------------------------|----------------------------------|---------------------------------------------|-----------------------------------|------------------------------------------------|------------------------------------------------|--------------------------------------------------|------------------------------------|---------------------------------------------------------|-------------------------------------------|------------------------------------------------|----------------------------------------------|---------------------------------------------------------|----------------------------------------------------|----------------------------------|-----------------------------------------|-----------------------------------------------------|---------------------------------|---------------------------------------------|--------------------------------------------------------|--------------------------------------------------------|
| 0                    | 0.0101                          | 0.00913                                            | 0.0417                          | 0.00816                          | 0.0312                                      | 0.0116                            | 0.0434                                         | 0.0399                                         | 0.321                                            | 0.00782                            | 0.00532                                                 | 0.00198                                   | 0.00996                                        | 0.00099                                      | 0.0076                                                  | 0.0013                                             | 0.0029                           | 0.00266                                 | 0.0189                                              | 0.00342                         | 0.0051                                      | 0.0122                                                 | 0.00371                                                |
| 20                   | 0.139                           | 0.12                                               | 0.0791                          | 0.0326                           | 0.0698                                      | 0.113                             | 0.16                                           | 0.149                                          | 0.376                                            | 0.106                              | 0.0808                                                  | 0.057                                     | 0.0996                                         | 0.0632                                       | 0.104                                                   | 0.101                                              | 0.0934                           | 0.102                                   | 0.0814                                              | 0.0499                          | 0.0448                                      | 0.0679                                                 | 0.0528                                                 |
| 50                   | 0.301                           | 0.275                                              | 0.143                           | 0.0759                           | 0.13                                        | 0.255                             | 0.336                                          | 0.312                                          | 0.6                                              | 0.253                              | 0.186                                                   | 0.141                                     | 0.217                                          | 0.15                                         | 0.261                                                   | 0.255                                              | 0.233                            | 0.245                                   | 0.171                                               | 0.119                           | 0.1                                         | 0.132                                                  | 0.122                                                  |
| 100                  | 0.619                           | 0.547                                              | 0.257                           | 0.157                            | 0.249                                       | 0.496                             | 0.621                                          | 0.565                                          | 0.867                                            | 0.526                              | 0.365                                                   | 0.284                                     | 0.431                                          | 0.296                                        | 0.507                                                   | 0.511                                              | 0.452                            | 0.483                                   | 0.343                                               | 0.24                            | 0.202                                       | 0.271                                                  | 0.243                                                  |
| 200                  | 1.3                             | 1.14                                               | 0.535                           | 0.34                             | 0.566                                       | 0.996                             | 1.33                                           | 1.19                                           | 1.39                                             | 1.08                               | 0.754                                                   | 0.598                                     | 0.928                                          | 0.636                                        | 1.03                                                    | 1.02                                               | 0.955                            | 1.03                                    | 0.694                                               | 0.519                           | 0.451                                       | 0.576                                                  | 0.54                                                   |
| 300                  | 1.77                            | 1.59                                               | 0.758                           | 0.478                            | 0.802                                       | 1.43                              | 1.93                                           | 1.73                                           | 2.17                                             | 1.62                               | 1.05                                                    | 0.822                                     | 1.27                                           | 0.871                                        | 1.48                                                    | 1.46                                               | 1.44                             | 1.42                                    | 0.951                                               | 0.75                            | 0.648                                       | 0.851                                                  | 0.813                                                  |
| 400                  | 2.44                            | 2.21                                               | 1.09                            | 0.68                             | 1.13                                        | 1.92                              | 2.61                                           | 2.41                                           | 2.71                                             | 2.2                                | 1.48                                                    | 1.15                                      | 1.72                                           | 1.21                                         | 2.04                                                    | 2.03                                               | 1.97                             | 1.98                                    | 1.37                                                | 1.05                            | 0.923                                       | 1.17                                                   | 1.11                                                   |
| 500                  | 3.06                            | 2.71                                               | 1.38                            | 0.887                            | 1.47                                        | 2.4                               | 3.24                                           | 2.99                                           | 3.52                                             | 2.85                               | 1.79                                                    | 1.42                                      | 2.15                                           | 1.5                                          | 2.51                                                    | 2.46                                               | 2.53                             | 2.43                                    | 1.69                                                | 1.31                            | 1.16                                        | 1.5                                                    | 1.44                                                   |
| <b>R<sup>2</sup></b> | <b>0.9989</b>                   | <b>0.9992</b>                                      | <b>0.9966</b>                   | <b>0.9968</b>                    | <b>0.9963</b>                               | <b>0.9998</b>                     | <b>0.9996</b>                                  | <b>0.9992</b>                                  | <b>0.9961</b>                                    | <b>0.9989</b>                      | <b>0.9989</b>                                           | <b>0.9990</b>                             | <b>0.9990</b>                                  | <b>0.9990</b>                                | <b>0.9997</b>                                           | <b>0.9993</b>                                      | <b>0.9990</b>                    | <b>0.9990</b>                           | <b>0.9983</b>                                       | <b>0.9992</b>                   | <b>0.9983</b>                               | <b>0.9987</b>                                          | <b>0.9984</b>                                          |

## C. Repeatability

**Table S11.** SIFT-MS repeatability data for Mix 1 in water at three levels (50, 250, and 500). The replicate shown in red is an outlier and was not included in the calculation.

| Level—Replicate<br>Number; Statistics | Acetone<br>(NO <sup>+</sup> 88) | Acetonitrile<br>(H <sub>3</sub> O <sup>+</sup> 42) | Benzene<br>(NO <sup>+</sup> 78) | Benzene<br>(NO <sup>+</sup> 108) | Benzene<br>(O <sub>2</sub> <sup>+</sup> 78) | 1-Butanol<br>(NO <sup>+</sup> 73) | Chloroform<br>(O <sub>2</sub> <sup>+</sup> 83) | Chloroform<br>(O <sub>2</sub> <sup>+</sup> 85) | Isooctane<br>(H <sub>3</sub> O <sup>+</sup> 113) | Isooctane<br>(NO <sup>+</sup> 113) | Isopropyl alcohol<br>(H <sub>3</sub> O <sup>+</sup> 43) | Isopropyl alcohol<br>(NO <sup>+</sup> 59) | Methanol<br>(H <sub>3</sub> O <sup>+</sup> 33) | Methyl ethyl ketone<br>(NO <sup>+</sup> 102) | Methyl ethyl ketone<br>(O <sub>2</sub> <sup>+</sup> 72) | Nitromethane<br>(H <sub>3</sub> O <sup>+</sup> 62) | Propanal<br>(NO <sup>+</sup> 57) | Tetrahydrofuran<br>(NO <sup>+</sup> 71) | Tetrahydrofuran<br>(O <sub>2</sub> <sup>+</sup> 71) | Toluene<br>(NO <sup>+</sup> 92) | Toluene<br>(O <sub>2</sub> <sup>+</sup> 92) | Trichloroethylene<br>(O <sub>2</sub> <sup>+</sup> 130) | Trichloroethylene<br>(O <sub>2</sub> <sup>+</sup> 132) |
|---------------------------------------|---------------------------------|----------------------------------------------------|---------------------------------|----------------------------------|---------------------------------------------|-----------------------------------|------------------------------------------------|------------------------------------------------|--------------------------------------------------|------------------------------------|---------------------------------------------------------|-------------------------------------------|------------------------------------------------|----------------------------------------------|---------------------------------------------------------|----------------------------------------------------|----------------------------------|-----------------------------------------|-----------------------------------------------------|---------------------------------|---------------------------------------------|--------------------------------------------------------|--------------------------------------------------------|
| 50–1                                  | 0.488                           | 0.415                                              | 0.186                           | 0.130                            | 0.191                                       | 0.383                             | 0.496                                          | 0.454                                          | 0.317                                            | 0.290                              | 0.246                                                   | 0.221                                     | 0.334                                          | 0.238                                        | 0.363                                                   | 0.304                                              | 0.266                            | 0.388                                   | 0.248                                               | 0.205                           | 0.175                                       | 0.208                                                  | 0.196                                                  |
| 50–2                                  | 0.331                           | 0.294                                              | 0.159                           | 0.109                            | 0.161                                       | 0.284                             | 0.421                                          | 0.373                                          | 0.324                                            | 0.295                              | 0.202                                                   | 0.160                                     | 0.217                                          | 0.166                                        | 0.263                                                   | 0.286                                              | 0.270                            | 0.279                                   | 0.184                                               | 0.178                           | 0.144                                       | 0.180                                                  | 0.173                                                  |
| 50–3                                  | 0.342                           | 0.297                                              | 0.152                           | 0.102                            | 0.157                                       | 0.290                             | 0.407                                          | 0.376                                          | 0.309                                            | 0.292                              | 0.195                                                   | 0.168                                     | 0.236                                          | 0.168                                        | 0.265                                                   | 0.279                                              | 0.259                            | 0.288                                   | 0.181                                               | 0.177                           | 0.146                                       | 0.181                                                  | 0.179                                                  |
| 50–4                                  | 0.360                           | 0.311                                              | 0.169                           | 0.110                            | 0.172                                       | 0.305                             | 0.430                                          | 0.389                                          | 0.281                                            | 0.298                              | 0.211                                                   | 0.165                                     | 0.247                                          | 0.170                                        | 0.286                                                   | 0.284                                              | 0.277                            | 0.296                                   | 0.193                                               | 0.184                           | 0.152                                       | 0.188                                                  | 0.182                                                  |
| 50–5                                  | 0.337                           | 0.295                                              | 0.153                           | 0.109                            | 0.160                                       | 0.292                             | 0.426                                          | 0.382                                          | 0.303                                            | 0.301                              | 0.193                                                   | 0.162                                     | 0.222                                          | 0.164                                        | 0.272                                                   | 0.293                                              | 0.267                            | 0.280                                   | 0.178                                               | 0.183                           | 0.152                                       | 0.178                                                  | 0.174                                                  |
| 50–6                                  | 0.342                           | 0.301                                              | 0.159                           | 0.116                            | 0.170                                       | 0.304                             | 0.417                                          | 0.377                                          | 0.308                                            | 0.304                              | 0.203                                                   | 0.169                                     | 0.235                                          | 0.168                                        | 0.275                                                   | 0.294                                              | 0.272                            | 0.285                                   | 0.183                                               | 0.187                           | 0.153                                       | 0.186                                                  | 0.178                                                  |
| Mean                                  | 0.342                           | 0.299                                              | 0.159                           | 0.110                            | 0.164                                       | 0.295                             | 0.420                                          | 0.379                                          | 0.305                                            | 0.298                              | 0.201                                                   | 0.164                                     | 0.231                                          | 0.167                                        | 0.273                                                   | 0.287                                              | 0.269                            | 0.285                                   | 0.184                                               | 0.182                           | 0.149                                       | 0.182                                                  | 0.177                                                  |
| SD                                    | 0.0097                          | 0.0062                                             | 0.0061                          | 0.0044                           | 0.0059                                      | 0.0082                            | 0.0079                                         | 0.0056                                         | 0.0139                                           | 0.0042                             | 0.0064                                                  | 0.0034                                    | 0.0107                                         | 0.0020                                       | 0.0082                                                  | 0.0056                                             | 0.0060                           | 0.0062                                  | 0.0050                                              | 0.0038                          | 0.0037                                      | 0.0038                                                 | 0.0033                                                 |
| %RSD                                  | 2.8                             | 2.1                                                | 3.8                             | 4.1                              | 3.6                                         | 2.8                               | 1.9                                            | 1.5                                            | 4.6                                              | 1.4                                | 3.2                                                     | 2.1                                       | 4.6                                            | 1.2                                          | 3.0                                                     | 2.0                                                | 2.2                              | 2.2                                     | 2.7                                                 | 2.1                             | 2.5                                         | 2.1                                                    | 1.9                                                    |
| 250–1                                 | 1.868                           | 1.675                                              | 0.793                           | 0.556                            | 0.834                                       | 1.615                             | 2.071                                          | 1.892                                          | 1.481                                            | 1.468                              | 1.113                                                   | 0.925                                     | 1.318                                          | 0.979                                        | 1.575                                                   | 1.499                                              | 1.318                            | 1.549                                   | 1.028                                               | 0.880                           | 0.761                                       | 0.909                                                  | 0.902                                                  |
| 250–2                                 | 1.618                           | 1.445                                              | 0.696                           | 0.489                            | 0.757                                       | 1.425                             | 1.861                                          | 1.702                                          | 1.481                                            | 1.298                              | 0.975                                                   | 0.777                                     | 1.108                                          | 0.829                                        | 1.375                                                   | 1.399                                              | 1.238                            | 1.349                                   | 0.911                                               | 0.789                           | 0.683                                       | 0.803                                                  | 0.804                                                  |
| 250–3                                 | 1.718                           | 1.545                                              | 0.768                           | 0.523                            | 0.813                                       | 1.505                             | 2.011                                          | 1.822                                          | 1.511                                            | 1.398                              | 1.023                                                   | 0.830                                     | 1.198                                          | 0.894                                        | 1.455                                                   | 1.449                                              | 1.308                            | 1.439                                   | 0.959                                               | 0.863                           | 0.741                                       | 0.865                                                  | 0.838                                                  |
| 250–4                                 | 1.748                           | 1.575                                              | 0.764                           | 0.518                            | 0.806                                       | 1.525                             | 1.981                                          | 1.802                                          | 1.501                                            | 1.438                              | 1.023                                                   | 0.840                                     | 1.208                                          | 0.888                                        | 1.445                                                   | 1.399                                              | 1.308                            | 1.459                                   | 0.968                                               | 0.846                           | 0.711                                       | 0.871                                                  | 0.849                                                  |
| 250–5                                 | 1.798                           | 1.575                                              | 0.747                           | 0.528                            | 0.820                                       | 1.495                             | 1.981                                          | 1.812                                          | 1.411                                            | 1.398                              | 1.013                                                   | 0.836                                     | 1.258                                          | 0.918                                        | 1.475                                                   | 1.379                                              | 1.298                            | 1.459                                   | 0.979                                               | 0.841                           | 0.737                                       | 0.862                                                  | 0.841                                                  |
| 250–6                                 | 1.548                           | 1.425                                              | 0.734                           | 0.495                            | 0.757                                       | 1.405                             | 1.881                                          | 1.712                                          | 1.551                                            | 1.398                              | 0.948                                                   | 0.759                                     | 1.078                                          | 0.807                                        | 1.385                                                   | 1.349                                              | 1.278                            | 1.339                                   | 0.890                                               | 0.803                           | 0.694                                       | 0.841                                                  | 0.789                                                  |
| Mean                                  | 1.716                           | 1.540                                              | 0.751                           | 0.519                            | 0.798                                       | 1.495                             | 1.965                                          | 1.790                                          | 1.489                                            | 1.399                              | 1.016                                                   | 0.827                                     | 1.194                                          | 0.885                                        | 1.452                                                   | 1.412                                              | 1.291                            | 1.432                                   | 0.956                                               | 0.837                           | 0.721                                       | 0.858                                                  | 0.837                                                  |
| SD                                    | 0.107                           | 0.085                                              | 0.030                           | 0.022                            | 0.030                                       | 0.069                             | 0.073                                          | 0.066                                          | 0.042                                            | 0.052                              | 0.051                                                   | 0.053                                     | 0.082                                          | 0.057                                        | 0.066                                                   | 0.049                                              | 0.027                            | 0.072                                   | 0.045                                               | 0.032                           | 0.027                                       | 0.032                                                  | 0.036                                                  |
| %RSD                                  | 6.2                             | 5.5                                                | 4.1                             | 4.3                              | 3.8                                         | 4.6                               | 3.7                                            | 3.7                                            | 2.8                                              | 3.7                                | 5.1                                                     | 6.4                                       | 6.9                                            | 6.4                                          | 4.5                                                     | 3.5                                                | 2.1                              | 5.0                                     | 4.7                                                 | 3.8                             | 3.8                                         | 3.7                                                    | 4.3                                                    |
| 500–1                                 | 3.298                           | 3.005                                              | 1.571                           | 1.118                            | 1.733                                       | 2.885                             | 4.191                                          | 3.782                                          | 3.381                                            | 2.998                              | 1.943                                                   | 1.609                                     | 2.288                                          | 1.726                                        | 2.915                                                   | 2.689                                              | 2.738                            | 2.869                                   | 1.978                                               | 1.749                           | 1.569                                       | 1.870                                                  | 1.838                                                  |
| 500–2                                 | 3.208                           | 2.935                                              | 1.511                           | 1.068                            | 1.693                                       | 2.785                             | 4.091                                          | 3.682                                          | 3.371                                            | 2.898                              | 1.913                                                   | 1.549                                     | 2.188                                          | 1.686                                        | 2.875                                                   | 2.709                                              | 2.618                            | 2.749                                   | 1.898                                               | 1.749                           | 1.599                                       | 1.880                                                  | 1.818                                                  |
| 500–3                                 | 3.288                           | 2.935                                              | 1.561                           | 1.068                            | 1.693                                       | 2.755                             | 4.071                                          | 3.732                                          | 3.231                                            | 2.948                              | 1.893                                                   | 1.559                                     | 2.238                                          | 1.696                                        | 2.825                                                   | 2.669                                              | 2.638                            | 2.739                                   | 1.858                                               | 1.729                           | 1.559                                       | 1.850                                                  | 1.788                                                  |
| 500–4                                 | 3.218                           | 2.925                                              | 1.601                           | 1.068                            | 1.733                                       | 2.855                             | 4.111                                          | 3.762                                          | 3.421                                            | 3.008                              | 1.903                                                   | 1.559                                     | 2.218                                          | 1.706                                        | 2.885                                                   | 2.799                                              | 2.728                            | 2.769                                   | 1.908                                               | 1.749                           | 1.579                                       | 1.840                                                  | 1.848                                                  |
| 500–5                                 | 3.158                           | 2.885                                              | 1.551                           | 1.078                            | 1.673                                       | 2.815                             | 3.991                                          | 3.702                                          | 3.231                                            | 2.828                              | 1.923                                                   | 1.529                                     | 2.138                                          | 1.646                                        | 2.865                                                   | 2.789                                              | 2.658                            | 2.709                                   | 1.848                                               | 1.699                           | 1.529                                       | 1.840                                                  | 1.768                                                  |
| 500–6                                 | 3.198                           | 2.885                                              | 1.551                           | 1.078                            | 1.683                                       | 2.745                             | 3.991                                          | 3.662                                          | 3.191                                            | 2.858                              | 1.893                                                   | 1.559                                     | 2.178                                          | 1.676                                        | 2.785                                                   | 2.709                                              | 2.618                            | 2.729                                   | 1.888                                               | 1.699                           | 1.539                                       | 1.820                                                  | 1.788                                                  |
| Mean                                  | 3.228                           | 2.928                                              | 1.558                           | 1.080                            | 1.701                                       | 2.807                             | 4.075                                          | 3.720                                          | 3.304                                            | 2.923                              | 1.912                                                   | 1.560                                     | 2.208                                          | 1.689                                        | 2.859                                                   | 2.727                                              | 2.666                            | 2.760                                   | 1.896                                               | 1.729                           | 1.562                                       | 1.850                                                  | 1.808                                                  |
| SD                                    | 0.050                           | 0.040                                              | 0.027                           | 0.018                            | 0.023                                       | 0.051                             | 0.070                                          | 0.043                                          | 0.089                                            | 0.068                              | 0.018                                                   | 0.024                                     | 0.048                                          | 0.025                                        | 0.042                                                   | 0.049                                              | 0.049                            | 0.052                                   | 0.042                                               | 0.022                           | 0.024                                       | 0.020                                                  | 0.029                                                  |
| %RSD                                  | 1.5                             | 1.4                                                | 1.7                             | 1.6                              | 1.4                                         | 1.8                               | 1.7                                            | 1.1                                            | 2.7                                              | 2.3                                | 0.93                                                    | 1.5                                       | 2.2                                            | 1.5                                          | 1.5                                                     | 1.8                                                | 1.8                              | 1.9                                     | 2.2                                                 | 1.3                             | 1.5                                         | 1.1                                                    | 1.6                                                    |

**Table S12a.** SIFT-MS repeatability data for Mix 1 in 5% DMAC:95% water at three levels (50, 250, and 500).

| Level—Replicate<br>Number; Statistics | Acetone<br>(NO <sup>+</sup> 88) | Acetonitrile<br>(H <sub>3</sub> O <sup>+</sup> 42) | Benzene<br>(NO <sup>+</sup> 78) | Benzene<br>(NO <sup>+</sup> 108) | Benzene<br>(O <sub>2</sub> <sup>+</sup> 78) | 1-Butanol<br>(NO <sup>+</sup> 73) | Chloroform<br>(O <sub>2</sub> <sup>+</sup> 83) | Chloroform<br>(O <sub>2</sub> <sup>+</sup> 85) | Isooctane<br>(H <sub>3</sub> O <sup>+</sup> 113) | Isooctane<br>(NO <sup>+</sup> 113) | Isopropyl alcohol<br>(H <sub>3</sub> O <sup>+</sup> 43) | Isopropyl alcohol<br>(NO <sup>+</sup> 59) | Methanol<br>(H <sub>3</sub> O <sup>+</sup> 33) | Methyl ethyl ketone<br>(NO <sup>+</sup> 102) | Methyl ethyl ketone<br>(O <sub>2</sub> <sup>+</sup> 72) | Nitromethane<br>(H <sub>3</sub> O <sup>+</sup> 62) | Propanal<br>(NO <sup>+</sup> 57) | Tetrahydrofuran<br>(NO <sup>+</sup> 71) | Tetrahydrofuran<br>(O <sub>2</sub> <sup>+</sup> 71) | Toluene<br>(NO <sup>+</sup> 92) | Toluene<br>(O <sub>2</sub> <sup>+</sup> 92) | Trichloroethylene<br>(O <sub>2</sub> <sup>+</sup> 130) | Trichloroethylene<br>(O <sub>2</sub> <sup>+</sup> 132) |
|---------------------------------------|---------------------------------|----------------------------------------------------|---------------------------------|----------------------------------|---------------------------------------------|-----------------------------------|------------------------------------------------|------------------------------------------------|--------------------------------------------------|------------------------------------|---------------------------------------------------------|-------------------------------------------|------------------------------------------------|----------------------------------------------|---------------------------------------------------------|----------------------------------------------------|----------------------------------|-----------------------------------------|-----------------------------------------------------|---------------------------------|---------------------------------------------|--------------------------------------------------------|--------------------------------------------------------|
| 50–1                                  | 0.353                           | 0.249                                              | 0.080                           | 0.064                            | 0.089                                       | 0.305                             | 0.243                                          | 0.209                                          | 0.262                                            | 0.205                              | 0.166                                                   | 0.156                                     | 0.187                                          | 0.170                                        | 0.299                                                   | 0.278                                              | 0.177                            | 0.228                                   | 0.137                                               | 0.101                           | 0.080                                       | 0.092                                                  | 0.087                                                  |
| 50–2                                  | 0.294                           | 0.228                                              | 0.077                           | 0.053                            | 0.083                                       | 0.287                             | 0.217                                          | 0.197                                          | 0.106                                            | 0.199                              | 0.152                                                   | 0.154                                     | 0.168                                          | 0.151                                        | 0.266                                                   | 0.256                                              | 0.175                            | 0.208                                   | 0.125                                               | 0.094                           | 0.072                                       | 0.085                                                  | 0.078                                                  |
| 50–3                                  | 0.299                           | 0.245                                              | 0.081                           | 0.052                            | 0.084                                       | 0.295                             | 0.236                                          | 0.205                                          | 0.210                                            | 0.192                              | 0.159                                                   | 0.153                                     | 0.184                                          | 0.166                                        | 0.290                                                   | 0.275                                              | 0.172                            | 0.231                                   | 0.144                                               | 0.100                           | 0.082                                       | 0.092                                                  | 0.087                                                  |
| 50–4                                  | 0.319                           | 0.251                                              | 0.079                           | 0.051                            | 0.083                                       | 0.301                             | 0.242                                          | 0.212                                          | 0.164                                            | 0.183                              | 0.173                                                   | 0.162                                     | 0.186                                          | 0.164                                        | 0.291                                                   | 0.289                                              | 0.166                            | 0.224                                   | 0.152                                               | 0.091                           | 0.083                                       | 0.085                                                  | 0.087                                                  |
| 50–5                                  | 0.326                           | 0.235                                              | 0.081                           | 0.055                            | 0.080                                       | 0.290                             | 0.231                                          | 0.207                                          | 0.081                                            | 0.190                              | 0.155                                                   | 0.152                                     | 0.164                                          | 0.155                                        | 0.263                                                   | 0.271                                              | 0.169                            | 0.217                                   | 0.137                                               | 0.092                           | 0.076                                       | 0.086                                                  | 0.078                                                  |
| 50–6                                  | 0.310                           | 0.229                                              | 0.074                           | 0.054                            | 0.078                                       | 0.292                             | 0.206                                          | 0.198                                          | 0.159                                            | 0.193                              | 0.157                                                   | 0.151                                     | 0.169                                          | 0.156                                        | 0.276                                                   | 0.265                                              | 0.162                            | 0.205                                   | 0.132                                               | 0.090                           | 0.078                                       | 0.084                                                  | 0.082                                                  |
| <b>Mean</b>                           | <b>0.317</b>                    | <b>0.239</b>                                       | <b>0.079</b>                    | <b>0.055</b>                     | <b>0.083</b>                                | <b>0.295</b>                      | <b>0.229</b>                                   | <b>0.205</b>                                   | <b>0.164</b>                                     | <b>0.193</b>                       | <b>0.160</b>                                            | <b>0.155</b>                              | <b>0.177</b>                                   | <b>0.160</b>                                 | <b>0.280</b>                                            | <b>0.272</b>                                       | <b>0.170</b>                     | <b>0.219</b>                            | <b>0.138</b>                                        | <b>0.095</b>                    | <b>0.079</b>                                | <b>0.087</b>                                           | <b>0.083</b>                                           |
| <b>SD</b>                             | <b>0.0195</b>                   | <b>0.0093</b>                                      | <b>0.0026</b>                   | <b>0.0041</b>                    | <b>0.0036</b>                               | <b>0.0062</b>                     | <b>0.0135</b>                                  | <b>0.0055</b>                                  | <b>0.0605</b>                                    | <b>0.0069</b>                      | <b>0.0071</b>                                           | <b>0.0036</b>                             | <b>0.0095</b>                                  | <b>0.0067</b>                                | <b>0.0134</b>                                           | <b>0.0103</b>                                      | <b>0.0051</b>                    | <b>0.0098</b>                           | <b>0.0086</b>                                       | <b>0.0045</b>                   | <b>0.0038</b>                               | <b>0.0033</b>                                          | <b>0.0041</b>                                          |
| <b>%RSD</b>                           | <b>6.2</b>                      | <b>3.9</b>                                         | <b>3.3</b>                      | <b>7.6</b>                       | <b>4.4</b>                                  | <b>2.1</b>                        | <b>5.9</b>                                     | <b>2.7</b>                                     | <b>37.0</b>                                      | <b>3.6</b>                         | <b>4.4</b>                                              | <b>2.4</b>                                | <b>5.4</b>                                     | <b>4.2</b>                                   | <b>4.8</b>                                              | <b>3.8</b>                                         | <b>3.0</b>                       | <b>4.5</b>                              | <b>6.2</b>                                          | <b>4.8</b>                      | <b>4.9</b>                                  | <b>3.7</b>                                             | <b>4.9</b>                                             |
| 250–1                                 | 1.366                           | 1.113                                              | 0.543                           | 0.358                            | 0.570                                       | 1.363                             | 1.497                                          | 1.397                                          | 1.369                                            | 1.415                              | 0.729                                                   | 0.701                                     | 0.814                                          | 0.734                                        | 1.338                                                   | 1.230                                              | 1.248                            | 1.024                                   | 0.687                                               | 0.612                           | 0.523                                       | 0.623                                                  | 0.615                                                  |
| 250–2                                 | 1.386                           | 1.103                                              | 0.540                           | 0.350                            | 0.581                                       | 1.323                             | 1.477                                          | 1.387                                          | 1.449                                            | 1.455                              | 0.717                                                   | 0.697                                     | 0.812                                          | 0.725                                        | 1.298                                                   | 1.230                                              | 1.248                            | 1.034                                   | 0.683                                               | 0.626                           | 0.539                                       | 0.627                                                  | 0.614                                                  |
| 250–3                                 | 1.576                           | 1.263                                              | 0.573                           | 0.384                            | 0.626                                       | 1.533                             | 1.607                                          | 1.487                                          | 1.279                                            | 1.395                              | 0.847                                                   | 0.829                                     | 0.907                                          | 0.829                                        | 1.528                                                   | 1.430                                              | 1.208                            | 1.174                                   | 0.802                                               | 0.682                           | 0.570                                       | 0.653                                                  | 0.635                                                  |
| 250–4                                 | 1.546                           | 1.183                                              | 0.551                           | 0.359                            | 0.597                                       | 1.433                             | 1.547                                          | 1.397                                          | 1.399                                            | 1.425                              | 0.782                                                   | 0.753                                     | 0.873                                          | 0.782                                        | 1.388                                                   | 1.270                                              | 1.268                            | 1.094                                   | 0.724                                               | 0.636                           | 0.543                                       | 0.633                                                  | 0.629                                                  |
| 250–5                                 | 1.376                           | 1.123                                              | 0.548                           | 0.393                            | 0.598                                       | 1.373                             | 1.547                                          | 1.407                                          | 1.419                                            | 1.495                              | 0.737                                                   | 0.712                                     | 0.821                                          | 0.732                                        | 1.328                                                   | 1.280                                              | 1.248                            | 1.044                                   | 0.685                                               | 0.629                           | 0.542                                       | 0.634                                                  | 0.617                                                  |
| 250–6                                 | 1.456                           | 1.183                                              | 0.566                           | 0.371                            | 0.600                                       | 1.403                             | 1.517                                          | 1.457                                          | 1.389                                            | 1.435                              | 0.775                                                   | 0.768                                     | 0.856                                          | 0.785                                        | 1.388                                                   | 1.300                                              | 1.258                            | 1.084                                   | 0.743                                               | 0.653                           | 0.560                                       | 0.654                                                  | 0.625                                                  |
| <b>Mean</b>                           | <b>1.451</b>                    | <b>1.161</b>                                       | <b>0.553</b>                    | <b>0.369</b>                     | <b>0.596</b>                                | <b>1.405</b>                      | <b>1.532</b>                                   | <b>1.422</b>                                   | <b>1.384</b>                                     | <b>1.436</b>                       | <b>0.764</b>                                            | <b>0.743</b>                              | <b>0.847</b>                                   | <b>0.765</b>                                 | <b>1.378</b>                                            | <b>1.290</b>                                       | <b>1.246</b>                     | <b>1.075</b>                            | <b>0.721</b>                                        | <b>0.640</b>                    | <b>0.547</b>                                | <b>0.638</b>                                           | <b>0.622</b>                                           |
| <b>SD</b>                             | <b>0.083</b>                    | <b>0.056</b>                                       | <b>0.012</b>                    | <b>0.015</b>                     | <b>0.017</b>                                | <b>0.067</b>                      | <b>0.042</b>                                   | <b>0.037</b>                                   | <b>0.053</b>                                     | <b>0.032</b>                       | <b>0.044</b>                                            | <b>0.046</b>                              | <b>0.035</b>                                   | <b>0.037</b>                                 | <b>0.074</b>                                            | <b>0.068</b>                                       | <b>0.019</b>                     | <b>0.051</b>                            | <b>0.043</b>                                        | <b>0.023</b>                    | <b>0.015</b>                                | <b>0.012</b>                                           | <b>0.008</b>                                           |
| <b>%RSD</b>                           | <b>5.7</b>                      | <b>4.8</b>                                         | <b>2.2</b>                      | <b>4.1</b>                       | <b>2.9</b>                                  | <b>4.7</b>                        | <b>2.7</b>                                     | <b>2.6</b>                                     | <b>3.8</b>                                       | <b>2.2</b>                         | <b>5.7</b>                                              | <b>6.3</b>                                | <b>4.1</b>                                     | <b>4.9</b>                                   | <b>5.4</b>                                              | <b>5.2</b>                                         | <b>1.5</b>                       | <b>4.7</b>                              | <b>5.9</b>                                          | <b>3.5</b>                      | <b>2.8</b>                                  | <b>1.9</b>                                             | <b>1.3</b>                                             |
| 500–1                                 | 2.746                           | 2.233                                              | 1.159                           | 0.804                            | 1.278                                       | 2.623                             | 3.227                                          | 2.987                                          | 2.909                                            | 3.215                              | 1.416                                                   | 1.428                                     | 1.634                                          | 1.499                                        | 2.598                                                   | 2.380                                              | 2.788                            | 2.074                                   | 1.404                                               | 1.299                           | 1.189                                       | 1.379                                                  | 1.309                                                  |
| 500–2                                 | 2.766                           | 2.233                                              | 1.169                           | 0.781                            | 1.278                                       | 2.573                             | 3.267                                          | 2.997                                          | 3.179                                            | 3.285                              | 1.426                                                   | 1.418                                     | 1.614                                          | 1.489                                        | 2.598                                                   | 2.420                                              | 2.828                            | 2.054                                   | 1.424                                               | 1.329                           | 1.209                                       | 1.369                                                  | 1.359                                                  |
| 500–3                                 | 2.626                           | 2.193                                              | 1.159                           | 0.756                            | 1.278                                       | 2.593                             | 3.117                                          | 2.937                                          | 3.329                                            | 3.255                              | 1.426                                                   | 1.368                                     | 1.554                                          | 1.439                                        | 2.628                                                   | 2.400                                              | 2.808                            | 2.014                                   | 1.384                                               | 1.329                           | 1.159                                       | 1.389                                                  | 1.299                                                  |
| 500–4                                 | 2.876                           | 2.383                                              | 1.219                           | 0.822                            | 1.328                                       | 2.793                             | 3.407                                          | 3.117                                          | 3.289                                            | 3.235                              | 1.526                                                   | 1.488                                     | 1.694                                          | 1.549                                        | 2.778                                                   | 2.610                                              | 2.758                            | 2.184                                   | 1.484                                               | 1.349                           | 1.229                                       | 1.419                                                  | 1.399                                                  |
| 500–5                                 | 2.836                           | 2.363                                              | 1.209                           | 0.781                            | 1.318                                       | 2.813                             | 3.327                                          | 3.027                                          | 3.169                                            | 3.155                              | 1.546                                                   | 1.468                                     | 1.674                                          | 1.569                                        | 2.838                                                   | 2.660                                              | 2.748                            | 2.184                                   | 1.514                                               | 1.359                           | 1.209                                       | 1.379                                                  | 1.339                                                  |
| 500–6                                 | 2.846                           | 2.313                                              | 1.169                           | 0.781                            | 1.278                                       | 2.633                             | 3.197                                          | 3.047                                          | 3.309                                            | 3.185                              | 1.476                                                   | 1.438                                     | 1.664                                          | 1.529                                        | 2.698                                                   | 2.500                                              | 2.738                            | 2.084                                   | 1.484                                               | 1.359                           | 1.209                                       | 1.379                                                  | 1.379                                                  |
| <b>Mean</b>                           | <b>2.783</b>                    | <b>2.286</b>                                       | <b>1.180</b>                    | <b>0.788</b>                     | <b>1.293</b>                                | <b>2.672</b>                      | <b>3.257</b>                                   | <b>3.019</b>                                   | <b>3.197</b>                                     | <b>3.221</b>                       | <b>1.469</b>                                            | <b>1.435</b>                              | <b>1.639</b>                                   | <b>1.512</b>                                 | <b>2.689</b>                                            | <b>2.495</b>                                       | <b>2.778</b>                     | <b>2.099</b>                            | <b>1.449</b>                                        | <b>1.338</b>                    | <b>1.201</b>                                | <b>1.386</b>                                           | <b>1.347</b>                                           |
| <b>SD</b>                             | <b>0.083</b>                    | <b>0.071</b>                                       | <b>0.024</b>                    | <b>0.021</b>                     | <b>0.021</b>                                | <b>0.095</b>                      | <b>0.093</b>                                   | <b>0.056</b>                                   | <b>0.143</b>                                     | <b>0.043</b>                       | <b>0.051</b>                                            | <b>0.038</b>                              | <b>0.046</b>                                   | <b>0.043</b>                                 | <b>0.092</b>                                            | <b>0.107</b>                                       | <b>0.033</b>                     | <b>0.064</b>                            | <b>0.048</b>                                        | <b>0.021</b>                    | <b>0.022</b>                                | <b>0.016</b>                                           | <b>0.036</b>                                           |
| <b>%RSD</b>                           | <b>3.0</b>                      | <b>3.1</b>                                         | <b>2.0</b>                      | <b>2.6</b>                       | <b>1.7</b>                                  | <b>3.6</b>                        | <b>2.8</b>                                     | <b>1.8</b>                                     | <b>4.5</b>                                       | <b>1.3</b>                         | <b>3.5</b>                                              | <b>2.7</b>                                | <b>2.8</b>                                     | <b>2.8</b>                                   | <b>3.4</b>                                              | <b>4.3</b>                                         | <b>1.2</b>                       | <b>3.0</b>                              | <b>3.3</b>                                          | <b>1.6</b>                      | <b>1.8</b>                                  | <b>1.2</b>                                             | <b>2.7</b>                                             |

**Table S12b.** SIFT-MS repeatability data for Mix 1 in 10% DMAC:90% water at three levels (50, 250, and 500).

| Level—Replicate<br>Number; Statistics | Acetone<br>(NO <sup>+</sup> 88) | Acetonitrile<br>(H <sub>3</sub> O <sup>+</sup> 42) | Benzene<br>(NO <sup>+</sup> 78) | Benzene<br>(NO <sup>+</sup> 108) | Benzene<br>(O <sub>2</sub> <sup>+</sup> 78) | 1-Butanol<br>(NO <sup>+</sup> 73) | Chloroform<br>(O <sub>2</sub> <sup>+</sup> 83) | Chloroform<br>(O <sub>2</sub> <sup>+</sup> 85) | Isooctane<br>(H <sub>3</sub> O <sup>+</sup> 113) | Isooctane<br>(NO <sup>+</sup> 113) | Isopropyl alcohol<br>(H <sub>3</sub> O <sup>+</sup> 43) | Isopropyl alcohol<br>(NO <sup>+</sup> 59) | Methanol<br>(H <sub>3</sub> O <sup>+</sup> 33) | Methyl ethyl ketone<br>(NO <sup>+</sup> 102) | Methyl ethyl ketone<br>(O <sub>2</sub> <sup>+</sup> 72) | Nitromethane<br>(H <sub>3</sub> O <sup>+</sup> 62) | Propanal<br>(NO <sup>+</sup> 57) | Tetrahydrofuran<br>(NO <sup>+</sup> 71) | Tetrahydrofuran<br>(O <sub>2</sub> <sup>+</sup> 71) | Toluene<br>(NO <sup>+</sup> 92) | Toluene<br>(O <sub>2</sub> <sup>+</sup> 92) | Trichloroethylene<br>(O <sub>2</sub> <sup>+</sup> 130) | Trichloroethylene<br>(O <sub>2</sub> <sup>+</sup> 132) |
|---------------------------------------|---------------------------------|----------------------------------------------------|---------------------------------|----------------------------------|---------------------------------------------|-----------------------------------|------------------------------------------------|------------------------------------------------|--------------------------------------------------|------------------------------------|---------------------------------------------------------|-------------------------------------------|------------------------------------------------|----------------------------------------------|---------------------------------------------------------|----------------------------------------------------|----------------------------------|-----------------------------------------|-----------------------------------------------------|---------------------------------|---------------------------------------------|--------------------------------------------------------|--------------------------------------------------------|
| 50–1                                  | 0.265                           | 0.260                                              | 0.072                           | 0.048                            | 0.077                                       | 0.278                             | 0.197                                          | 0.189                                          | 0.190                                            | 0.205                              | 0.164                                                   | 0.157                                     | 0.194                                          | 0.166                                        | 0.285                                                   | 0.297                                              | 0.182                            | 0.225                                   | 0.143                                               | 0.082                           | 0.064                                       | 0.078                                                  | 0.067                                                  |
| 50–2                                  | 0.241                           | 0.218                                              | 0.060                           | 0.048                            | 0.071                                       | 0.248                             | 0.188                                          | 0.181                                          | 0.110                                            | 0.213                              | 0.144                                                   | 0.138                                     | 0.165                                          | 0.144                                        | 0.231                                                   | 0.254                                              | 0.191                            | 0.191                                   | 0.126                                               | 0.074                           | 0.058                                       | 0.075                                                  | 0.068                                                  |
| 50–3                                  | 0.276                           | 0.222                                              | 0.067                           | 0.050                            | 0.067                                       | 0.243                             | 0.193                                          | 0.186                                          | 0.120                                            | 0.213                              | 0.143                                                   | 0.133                                     | 0.171                                          | 0.139                                        | 0.240                                                   | 0.252                                              | 0.192                            | 0.196                                   | 0.124                                               | 0.072                           | 0.057                                       | 0.069                                                  | 0.069                                                  |
| 50–4                                  | 0.232                           | 0.213                                              | 0.066                           | 0.047                            | 0.066                                       | 0.246                             | 0.193                                          | 0.173                                          | 0.130                                            | 0.204                              | 0.142                                                   | 0.142                                     | 0.161                                          | 0.139                                        | 0.233                                                   | 0.259                                              | 0.185                            | 0.197                                   | 0.130                                               | 0.076                           | 0.058                                       | 0.072                                                  | 0.065                                                  |
| 50–5                                  | 0.285                           | 0.227                                              | 0.063                           | 0.043                            | 0.072                                       | 0.261                             | 0.197                                          | 0.182                                          | 0.130                                            | 0.209                              | 0.143                                                   | 0.146                                     | 0.172                                          | 0.147                                        | 0.242                                                   | 0.261                                              | 0.184                            | 0.210                                   | 0.129                                               | 0.077                           | 0.061                                       | 0.066                                                  | 0.071                                                  |
| 50–6                                  | 0.298                           | 0.258                                              | 0.070                           | 0.044                            | 0.073                                       | 0.288                             | 0.202                                          | 0.190                                          | 0.040                                            | 0.206                              | 0.169                                                   | 0.161                                     | 0.201                                          | 0.161                                        | 0.282                                                   | 0.286                                              | 0.182                            | 0.229                                   | 0.148                                               | 0.079                           | 0.070                                       | 0.080                                                  | 0.073                                                  |
| <b>Mean</b>                           | <b>0.266</b>                    | <b>0.233</b>                                       | <b>0.066</b>                    | <b>0.047</b>                     | <b>0.071</b>                                | <b>0.261</b>                      | <b>0.195</b>                                   | <b>0.184</b>                                   | <b>0.120</b>                                     | <b>0.208</b>                       | <b>0.151</b>                                            | <b>0.146</b>                              | <b>0.178</b>                                   | <b>0.149</b>                                 | <b>0.252</b>                                            | <b>0.268</b>                                       | <b>0.186</b>                     | <b>0.208</b>                            | <b>0.134</b>                                        | <b>0.077</b>                    | <b>0.061</b>                                | <b>0.073</b>                                           | <b>0.069</b>                                           |
| <b>SD</b>                             | <b>0.0233</b>                   | <b>0.0189</b>                                      | <b>0.0038</b>                   | <b>0.0027</b>                    | <b>0.0038</b>                               | <b>0.0170</b>                     | <b>0.0044</b>                                  | <b>0.0057</b>                                  | <b>0.0440</b>                                    | <b>0.0036</b>                      | <b>0.0112</b>                                           | <b>0.0100</b>                             | <b>0.0149</b>                                  | <b>0.0105</b>                                | <b>0.0225</b>                                           | <b>0.0171</b>                                      | <b>0.0040</b>                    | <b>0.0147</b>                           | <b>0.0089</b>                                       | <b>0.0030</b>                   | <b>0.0045</b>                               | <b>0.0050</b>                                          | <b>0.0027</b>                                          |
| <b>%RSD</b>                           | <b>8.8</b>                      | <b>8.1</b>                                         | <b>5.8</b>                      | <b>5.7</b>                       | <b>5.4</b>                                  | <b>6.5</b>                        | <b>2.2</b>                                     | <b>3.1</b>                                     | <b>36.6</b>                                      | <b>1.7</b>                         | <b>7.4</b>                                              | <b>6.8</b>                                | <b>8.4</b>                                     | <b>7.0</b>                                   | <b>8.9</b>                                              | <b>6.4</b>                                         | <b>2.2</b>                       | <b>7.1</b>                              | <b>6.7</b>                                          | <b>3.9</b>                      | <b>7.3</b>                                  | <b>6.8</b>                                             | <b>3.8</b>                                             |
| 250–1                                 | 1.253                           | 1.092                                              | 0.446                           | 0.301                            | 0.459                                       | 1.184                             | 1.328                                          | 1.170                                          | 1.360                                            | 1.524                              | 0.693                                                   | 0.651                                     | 0.803                                          | 0.660                                        | 1.193                                                   | 1.208                                              | 1.336                            | 0.967                                   | 0.629                                               | 0.481                           | 0.426                                       | 0.544                                                  | 0.527                                                  |
| 250–2                                 | 1.333                           | 1.202                                              | 0.456                           | 0.330                            | 0.521                                       | 1.274                             | 1.428                                          | 1.290                                          | 1.430                                            | 1.564                              | 0.755                                                   | 0.749                                     | 0.904                                          | 0.748                                        | 1.343                                                   | 1.318                                              | 1.346                            | 1.042                                   | 0.700                                               | 0.537                           | 0.470                                       | 0.535                                                  | 0.572                                                  |
| 250–3                                 | 1.273                           | 1.082                                              | 0.440                           | 0.318                            | 0.471                                       | 1.184                             | 1.248                                          | 1.220                                          | 1.500                                            | 1.524                              | 0.687                                                   | 0.661                                     | 0.831                                          | 0.672                                        | 1.153                                                   | 1.188                                              | 1.326                            | 0.929                                   | 0.625                                               | 0.483                           | 0.409                                       | 0.509                                                  | 0.513                                                  |
| 250–4                                 | 1.633                           | 1.392                                              | 0.496                           | 0.318                            | 0.510                                       | 1.464                             | 1.418                                          | 1.330                                          | 0.740                                            | 1.024                              | 0.882                                                   | 0.858                                     | 0.952                                          | 0.848                                        | 1.463                                                   | 1.468                                              | 0.910                            | 1.182                                   | 0.760                                               | 0.536                           | 0.469                                       | 0.574                                                  | 0.519                                                  |
| 250–5                                 | 1.293                           | 1.122                                              | 0.440                           | 0.304                            | 0.465                                       | 1.224                             | 1.288                                          | 1.170                                          | 1.540                                            | 1.464                              | 0.740                                                   | 0.689                                     | 0.828                                          | 0.700                                        | 1.213                                                   | 1.248                                              | 1.276                            | 0.977                                   | 0.647                                               | 0.487                           | 0.422                                       | 0.517                                                  | 0.488                                                  |
| 250–6                                 | 1.313                           | 1.102                                              | 0.438                           | 0.281                            | 0.472                                       | 1.204                             | 1.278                                          | 1.150                                          | 1.280                                            | 1.514                              | 0.704                                                   | 0.679                                     | 0.798                                          | 0.681                                        | 1.203                                                   | 1.268                                              | 1.316                            | 0.951                                   | 0.650                                               | 0.476                           | 0.413                                       | 0.511                                                  | 0.507                                                  |
| <b>Mean</b>                           | <b>1.350</b>                    | <b>1.165</b>                                       | <b>0.452</b>                    | <b>0.308</b>                     | <b>0.483</b>                                | <b>1.256</b>                      | <b>1.331</b>                                   | <b>1.222</b>                                   | <b>1.308</b>                                     | <b>1.436</b>                       | <b>0.744</b>                                            | <b>0.715</b>                              | <b>0.853</b>                                   | <b>0.718</b>                                 | <b>1.261</b>                                            | <b>1.283</b>                                       | <b>1.251</b>                     | <b>1.008</b>                            | <b>0.669</b>                                        | <b>0.500</b>                    | <b>0.435</b>                                | <b>0.532</b>                                           | <b>0.521</b>                                           |
| <b>SD</b>                             | <b>0.129</b>                    | <b>0.109</b>                                       | <b>0.020</b>                    | <b>0.016</b>                     | <b>0.024</b>                                | <b>0.098</b>                      | <b>0.069</b>                                   | <b>0.067</b>                                   | <b>0.268</b>                                     | <b>0.186</b>                       | <b>0.067</b>                                            | <b>0.071</b>                              | <b>0.056</b>                                   | <b>0.065</b>                                 | <b>0.108</b>                                            | <b>0.093</b>                                       | <b>0.154</b>                     | <b>0.085</b>                            | <b>0.048</b>                                        | <b>0.026</b>                    | <b>0.025</b>                                | <b>0.023</b>                                           | <b>0.026</b>                                           |
| <b>%RSD</b>                           | <b>9.6</b>                      | <b>9.3</b>                                         | <b>4.5</b>                      | <b>5.1</b>                       | <b>4.9</b>                                  | <b>7.8</b>                        | <b>5.2</b>                                     | <b>5.5</b>                                     | <b>20.5</b>                                      | <b>13.0</b>                        | <b>9.0</b>                                              | <b>10.0</b>                               | <b>6.6</b>                                     | <b>9.0</b>                                   | <b>8.5</b>                                              | <b>7.2</b>                                         | <b>12.3</b>                      | <b>8.5</b>                              | <b>7.1</b>                                          | <b>5.2</b>                      | <b>5.8</b>                                  | <b>4.3</b>                                             | <b>5.0</b>                                             |
| 500–1                                 | 2.543                           | 2.152                                              | 0.936                           | 0.611                            | 1.038                                       | 2.284                             | 2.698                                          | 2.560                                          | 3.450                                            | 3.294                              | 1.365                                                   | 1.297                                     | 1.494                                          | 1.348                                        | 2.403                                                   | 2.428                                              | 2.926                            | 1.862                                   | 1.308                                               | 1.048                           | 0.921                                       | 1.157                                                  | 1.124                                                  |
| 500–2                                 | 3.063                           | 2.532                                              | 0.999                           | 0.712                            | 1.138                                       | 2.634                             | 2.978                                          | 2.710                                          | 3.030                                            | 3.194                              | 1.545                                                   | 1.507                                     | 1.924                                          | 1.528                                        | 2.703                                                   | 2.668                                              | 2.746                            | 2.132                                   | 1.468                                               | 1.098                           | 0.983                                       | 1.237                                                  | 1.174                                                  |
| 500–3                                 | 2.533                           | 2.142                                              | 0.943                           | 0.627                            | 1.008                                       | 2.264                             | 2.718                                          | 2.510                                          | 3.360                                            | 3.414                              | 1.325                                                   | 1.287                                     | 1.594                                          | 1.318                                        | 2.353                                                   | 2.308                                              | 2.936                            | 1.882                                   | 1.288                                               | 1.028                           | 0.904                                       | 1.157                                                  | 1.114                                                  |
| 500–4                                 | 2.703                           | 2.242                                              | 0.954                           | 0.677                            | 1.048                                       | 2.344                             | 2.778                                          | 2.540                                          | 2.970                                            | 3.184                              | 1.415                                                   | 1.357                                     | 1.674                                          | 1.428                                        | 2.513                                                   | 2.428                                              | 2.826                            | 1.982                                   | 1.358                                               | 1.078                           | 0.966                                       | 1.187                                                  | 1.154                                                  |
| 500–5                                 | 2.593                           | 2.212                                              | 0.967                           | 0.675                            | 1.038                                       | 2.344                             | 2.718                                          | 2.530                                          | 3.120                                            | 3.294                              | 1.375                                                   | 1.347                                     | 1.624                                          | 1.388                                        | 2.523                                                   | 2.438                                              | 2.886                            | 1.952                                   | 1.308                                               | 1.038                           | 0.946                                       | 1.167                                                  | 1.144                                                  |
| 500–6                                 | 2.633                           | 2.162                                              | 0.941                           | 0.635                            | 1.048                                       | 2.294                             | 2.678                                          | 2.520                                          | 3.200                                            | 3.274                              | 1.365                                                   | 1.307                                     | 1.604                                          | 1.348                                        | 2.413                                                   | 2.338                                              | 2.866                            | 1.902                                   | 1.278                                               | 1.038                           | 0.902                                       | 1.147                                                  | 1.094                                                  |
| <b>Mean</b>                           | <b>2.678</b>                    | <b>2.240</b>                                       | <b>0.956</b>                    | <b>0.656</b>                     | <b>1.053</b>                                | <b>2.361</b>                      | <b>2.761</b>                                   | <b>2.562</b>                                   | <b>3.188</b>                                     | <b>3.276</b>                       | <b>1.398</b>                                            | <b>1.350</b>                              | <b>1.653</b>                                   | <b>1.393</b>                                 | <b>2.484</b>                                            | <b>2.434</b>                                       | <b>2.864</b>                     | <b>1.952</b>                            | <b>1.335</b>                                        | <b>1.054</b>                    | <b>0.937</b>                                | <b>1.176</b>                                           | <b>1.134</b>                                           |
| <b>SD</b>                             | <b>0.181</b>                    | <b>0.135</b>                                       | <b>0.021</b>                    | <b>0.035</b>                     | <b>0.040</b>                                | <b>0.126</b>                      | <b>0.102</b>                                   | <b>0.068</b>                                   | <b>0.171</b>                                     | <b>0.076</b>                       | <b>0.071</b>                                            | <b>0.075</b>                              | <b>0.133</b>                                   | <b>0.070</b>                                 | <b>0.115</b>                                            | <b>0.115</b>                                       | <b>0.064</b>                     | <b>0.090</b>                            | <b>0.065</b>                                        | <b>0.025</b>                    | <b>0.031</b>                                | <b>0.030</b>                                           | <b>0.026</b>                                           |
| <b>%RSD</b>                           | <b>6.8</b>                      | <b>6.0</b>                                         | <b>2.2</b>                      | <b>5.3</b>                       | <b>3.8</b>                                  | <b>5.3</b>                        | <b>3.7</b>                                     | <b>2.7</b>                                     | <b>5.4</b>                                       | <b>2.3</b>                         | <b>5.1</b>                                              | <b>5.5</b>                                | <b>8.0</b>                                     | <b>5.0</b>                                   | <b>4.6</b>                                              | <b>4.7</b>                                         | <b>2.2</b>                       | <b>4.6</b>                              | <b>4.8</b>                                          | <b>2.4</b>                      | <b>3.3</b>                                  | <b>2.6</b>                                             | <b>2.3</b>                                             |

**Table S12c.** SIFT-MS repeatability data for Mix 1 in 25% DMAC:75% water at three levels (50, 250, and 500).

| Level-Replicate<br>Number; Statistics | Acetone<br>(NO <sup>+</sup> 88) | Acetonitrile<br>(H <sub>3</sub> O <sup>+</sup> 42) | Benzene<br>(NO <sup>+</sup> 78) | Benzene<br>(NO <sup>+</sup> 108) | Benzene<br>(O <sub>2</sub> <sup>+</sup> 78) | 1-Butanol<br>(NO <sup>+</sup> 73) | Chloroform<br>(O <sub>2</sub> <sup>+</sup> 83) | Chloroform<br>(O <sub>2</sub> <sup>+</sup> 85) | Isooctane<br>(H <sub>3</sub> O <sup>+</sup> 113) | Isooctane<br>(NO <sup>+</sup> 113) | Isopropyl alcohol<br>(H <sub>3</sub> O <sup>+</sup> 43) | Isopropyl alcohol<br>(NO <sup>+</sup> 59) | Methanol<br>(H <sub>3</sub> O <sup>+</sup> 33) | Methyl ethyl ketone<br>(NO <sup>+</sup> 102) | Methyl ethyl ketone<br>(O <sub>2</sub> <sup>+</sup> 72) | Nitromethane<br>(H <sub>3</sub> O <sup>+</sup> 62) | Propanal<br>(NO <sup>+</sup> 57) | Tetrahydrofuran<br>(NO <sup>+</sup> 71) | Tetrahydrofuran<br>(O <sub>2</sub> <sup>+</sup> 71) | Toluene<br>(NO <sup>+</sup> 92) | Toluene<br>(O <sub>2</sub> <sup>+</sup> 92) | Trichloroethylene<br>(O <sub>2</sub> <sup>+</sup> 130) | Trichloroethylene<br>(O <sub>2</sub> <sup>+</sup> 132) |
|---------------------------------------|---------------------------------|----------------------------------------------------|---------------------------------|----------------------------------|---------------------------------------------|-----------------------------------|------------------------------------------------|------------------------------------------------|--------------------------------------------------|------------------------------------|---------------------------------------------------------|-------------------------------------------|------------------------------------------------|----------------------------------------------|---------------------------------------------------------|----------------------------------------------------|----------------------------------|-----------------------------------------|-----------------------------------------------------|---------------------------------|---------------------------------------------|--------------------------------------------------------|--------------------------------------------------------|
| 50-1                                  | 0.259                           | 0.210                                              | 0.030                           | 0.021                            | 0.031                                       | 0.185                             | 0.086                                          | 0.074                                          | -0.280                                           | 0.134                              | 0.129                                                   | 0.119                                     | 0.181                                          | 0.113                                        | 0.191                                                   | 0.225                                              | 0.119                            | 0.159                                   | 0.092                                               | 0.033                           | 0.026                                       | 0.039                                                  | 0.037                                                  |
| 50-2                                  | 0.258                           | 0.211                                              | 0.028                           | 0.023                            | 0.030                                       | 0.179                             | 0.066                                          | 0.073                                          | -0.050                                           | 0.140                              | 0.129                                                   | 0.123                                     | 0.183                                          | 0.115                                        | 0.182                                                   | 0.222                                              | 0.122                            | 0.151                                   | 0.081                                               | 0.033                           | 0.025                                       | 0.037                                                  | 0.038                                                  |
| 50-3                                  | 0.285                           | 0.200                                              | 0.033                           | 0.020                            | 0.029                                       | 0.180                             | 0.087                                          | 0.074                                          | -0.080                                           | 0.144                              | 0.128                                                   | 0.127                                     | 0.170                                          | 0.117                                        | 0.188                                                   | 0.221                                              | 0.115                            | 0.154                                   | 0.080                                               | 0.032                           | 0.026                                       | 0.041                                                  | 0.043                                                  |
| 50-4                                  | 0.233                           | 0.207                                              | 0.031                           | 0.021                            | 0.031                                       | 0.187                             | 0.075                                          | 0.067                                          | -0.050                                           | 0.139                              | 0.120                                                   | 0.122                                     | 0.174                                          | 0.115                                        | 0.187                                                   | 0.234                                              | 0.117                            | 0.158                                   | 0.076                                               | 0.029                           | 0.025                                       | 0.035                                                  | 0.034                                                  |
| 50-5                                  | 0.288                           | 0.214                                              | 0.032                           | 0.024                            | 0.034                                       | 0.189                             | 0.076                                          | 0.067                                          | -0.200                                           | 0.136                              | 0.135                                                   | 0.128                                     | 0.184                                          | 0.114                                        | 0.210                                                   | 0.240                                              | 0.118                            | 0.167                                   | 0.093                                               | 0.033                           | 0.025                                       | 0.038                                                  | 0.035                                                  |
| 50-6                                  | 0.227                           | 0.212                                              | 0.031                           | 0.020                            | 0.032                                       | 0.187                             | 0.082                                          | 0.078                                          | 0.010                                            | 0.142                              | 0.133                                                   | 0.126                                     | 0.183                                          | 0.115                                        | 0.210                                                   | 0.238                                              | 0.118                            | 0.164                                   | 0.096                                               | 0.032                           | 0.026                                       | 0.040                                                  | 0.038                                                  |
| <b>Mean</b>                           | <b>0.258</b>                    | <b>0.209</b>                                       | <b>0.031</b>                    | <b>0.021</b>                     | <b>0.031</b>                                | <b>0.184</b>                      | <b>0.079</b>                                   | <b>0.072</b>                                   | <b>-0.108</b>                                    | <b>0.139</b>                       | <b>0.129</b>                                            | <b>0.124</b>                              | <b>0.179</b>                                   | <b>0.115</b>                                 | <b>0.195</b>                                            | <b>0.230</b>                                       | <b>0.118</b>                     | <b>0.159</b>                            | <b>0.086</b>                                        | <b>0.032</b>                    | <b>0.025</b>                                | <b>0.038</b>                                           | <b>0.037</b>                                           |
| <b>SD</b>                             | <b>0.0231</b>                   | <b>0.0045</b>                                      | <b>0.0016</b>                   | <b>0.0016</b>                    | <b>0.0015</b>                               | <b>0.0037</b>                     | <b>0.0072</b>                                  | <b>0.0040</b>                                  | <b>0.0996</b>                                    | <b>0.0034</b>                      | <b>0.0047</b>                                           | <b>0.0031</b>                             | <b>0.0053</b>                                  | <b>0.0012</b>                                | <b>0.0112</b>                                           | <b>0.0076</b>                                      | <b>0.0021</b>                    | <b>0.0055</b>                           | <b>0.0076</b>                                       | <b>0.0015</b>                   | <b>0.0008</b>                               | <b>0.0020</b>                                          | <b>0.0027</b>                                          |
| <b>%RSD</b>                           | <b>9.0</b>                      | <b>2.2</b>                                         | <b>5.1</b>                      | <b>7.6</b>                       | <b>4.7</b>                                  | <b>2.0</b>                        | <b>9.2</b>                                     | <b>5.5</b>                                     | <b>-91.9</b>                                     | <b>2.4</b>                         | <b>3.7</b>                                              | <b>2.5</b>                                | <b>2.9</b>                                     | <b>1.1</b>                                   | <b>5.7</b>                                              | <b>3.3</b>                                         | <b>1.8</b>                       | <b>3.4</b>                              | <b>8.8</b>                                          | <b>4.6</b>                      | <b>3.0</b>                                  | <b>5.1</b>                                             | <b>7.3</b>                                             |
| 250-1                                 | 1.216                           | 1.043                                              | 0.229                           | 0.151                            | 0.250                                       | 0.868                             | 0.745                                          | 0.661                                          | 0.810                                            | 1.228                              | 0.617                                                   | 0.602                                     | 0.839                                          | 0.580                                        | 1.000                                                   | 1.130                                              | 1.061                            | 0.787                                   | 0.518                                               | 0.233                           | 0.194                                       | 0.299                                                  | 0.282                                                  |
| 250-2                                 | 1.216                           | 1.033                                              | 0.239                           | 0.164                            | 0.245                                       | 0.869                             | 0.725                                          | 0.649                                          | 1.170                                            | 1.218                              | 0.618                                                   | 0.611                                     | 0.860                                          | 0.566                                        | 0.990                                                   | 1.130                                              | 1.041                            | 0.797                                   | 0.499                                               | 0.233                           | 0.197                                       | 0.297                                                  | 0.282                                                  |
| 250-3                                 | 1.296                           | 1.093                                              | 0.247                           | 0.158                            | 0.264                                       | 0.914                             | 0.775                                          | 0.732                                          | 1.290                                            | 1.258                              | 0.645                                                   | 0.636                                     | 0.884                                          | 0.592                                        | 1.030                                                   | 1.160                                              | 1.061                            | 0.828                                   | 0.549                                               | 0.235                           | 0.206                                       | 0.294                                                  | 0.301                                                  |
| 250-4                                 | 1.306                           | 1.053                                              | 0.228                           | 0.151                            | 0.250                                       | 0.871                             | 0.735                                          | 0.722                                          | 0.920                                            | 1.188                              | 0.623                                                   | 0.609                                     | 0.872                                          | 0.570                                        | 0.990                                                   | 1.110                                              | 1.011                            | 0.799                                   | 0.499                                               | 0.239                           | 0.199                                       | 0.285                                                  | 0.273                                                  |
| 250-5                                 | 1.266                           | 1.043                                              | 0.236                           | 0.150                            | 0.250                                       | 0.898                             | 0.715                                          | 0.632                                          | 0.990                                            | 1.198                              | 0.630                                                   | 0.620                                     | 0.866                                          | 0.570                                        | 1.000                                                   | 1.120                                              | 1.011                            | 0.780                                   | 0.509                                               | 0.240                           | 0.195                                       | 0.300                                                  | 0.288                                                  |
| 250-6                                 | 1.256                           | 1.023                                              | 0.234                           | 0.151                            | 0.237                                       | 0.861                             | 0.688                                          | 0.614                                          | 0.870                                            | 1.128                              | 0.626                                                   | 0.600                                     | 0.852                                          | 0.554                                        | 0.950                                                   | 1.110                                              | 0.978                            | 0.787                                   | 0.492                                               | 0.223                           | 0.190                                       | 0.289                                                  | 0.268                                                  |
| <b>Mean</b>                           | <b>1.259</b>                    | <b>1.048</b>                                       | <b>0.235</b>                    | <b>0.154</b>                     | <b>0.249</b>                                | <b>0.880</b>                      | <b>0.731</b>                                   | <b>0.668</b>                                   | <b>1.008</b>                                     | <b>1.203</b>                       | <b>0.627</b>                                            | <b>0.613</b>                              | <b>0.862</b>                                   | <b>0.572</b>                                 | <b>0.994</b>                                            | <b>1.126</b>                                       | <b>1.027</b>                     | <b>0.797</b>                            | <b>0.511</b>                                        | <b>0.234</b>                    | <b>0.196</b>                                | <b>0.294</b>                                           | <b>0.282</b>                                           |
| <b>SD</b>                             | <b>0.035</b>                    | <b>0.022</b>                                       | <b>0.006</b>                    | <b>0.005</b>                     | <b>0.008</b>                                | <b>0.019</b>                      | <b>0.027</b>                                   | <b>0.044</b>                                   | <b>0.169</b>                                     | <b>0.040</b>                       | <b>0.009</b>                                            | <b>0.012</b>                              | <b>0.014</b>                                   | <b>0.012</b>                                 | <b>0.024</b>                                            | <b>0.017</b>                                       | <b>0.030</b>                     | <b>0.016</b>                            | <b>0.019</b>                                        | <b>0.006</b>                    | <b>0.005</b>                                | <b>0.005</b>                                           | <b>0.011</b>                                           |
| <b>%RSD</b>                           | <b>2.8</b>                      | <b>2.1</b>                                         | <b>2.7</b>                      | <b>3.3</b>                       | <b>3.2</b>                                  | <b>2.2</b>                        | <b>3.7</b>                                     | <b>6.6</b>                                     | <b>16.8</b>                                      | <b>3.4</b>                         | <b>1.5</b>                                              | <b>2.0</b>                                | <b>1.7</b>                                     | <b>2.1</b>                                   | <b>2.4</b>                                              | <b>1.5</b>                                         | <b>2.9</b>                       | <b>2.0</b>                              | <b>3.7</b>                                          | <b>2.4</b>                      | <b>2.5</b>                                  | <b>1.8</b>                                             | <b>3.8</b>                                             |
| 500-1                                 | 2.416                           | 2.043                                              | 0.493                           | 0.335                            | 0.549                                       | 1.674                             | 1.545                                          | 1.452                                          | 2.680                                            | 2.738                              | 1.215                                                   | 1.168                                     | 1.685                                          | 1.107                                        | 1.920                                                   | 2.150                                              | 2.321                            | 1.564                                   | 1.042                                               | 0.497                           | 0.443                                       | 0.640                                                  | 0.641                                                  |
| 500-2                                 | 2.416                           | 2.023                                              | 0.501                           | 0.351                            | 0.547                                       | 1.654                             | 1.545                                          | 1.432                                          | 2.420                                            | 2.628                              | 1.205                                                   | 1.198                                     | 1.655                                          | 1.087                                        | 1.940                                                   | 2.120                                              | 2.231                            | 1.564                                   | 1.052                                               | 0.505                           | 0.435                                       | 0.631                                                  | 0.620                                                  |
| 500-3                                 | 2.416                           | 2.033                                              | 0.502                           | 0.346                            | 0.528                                       | 1.674                             | 1.545                                          | 1.442                                          | 2.560                                            | 2.608                              | 1.205                                                   | 1.208                                     | 1.685                                          | 1.077                                        | 1.950                                                   | 2.160                                              | 2.281                            | 1.564                                   | 1.022                                               | 0.502                           | 0.435                                       | 0.635                                                  | 0.610                                                  |
| 500-4                                 | 2.346                           | 2.023                                              | 0.507                           | 0.337                            | 0.546                                       | 1.704                             | 1.575                                          | 1.452                                          | 2.640                                            | 2.608                              | 1.225                                                   | 1.158                                     | 1.645                                          | 1.077                                        | 2.010                                                   | 2.230                                              | 2.251                            | 1.544                                   | 1.032                                               | 0.491                           | 0.428                                       | 0.624                                                  | 0.613                                                  |
| 500-5                                 | 2.176                           | 1.993                                              | 0.495                           | 0.317                            | 0.535                                       | 1.704                             | 1.555                                          | 1.472                                          | 2.550                                            | 2.568                              | 1.245                                                   | 1.158                                     | 1.615                                          | 1.077                                        | 1.980                                                   | 2.230                                              | 2.221                            | 1.534                                   | 1.052                                               | 0.479                           | 0.411                                       | 0.630                                                  | 0.599                                                  |
| 500-6                                 | 2.446                           | 2.113                                              | 0.502                           | 0.325                            | 0.546                                       | 1.744                             | 1.565                                          | 1.502                                          | 2.700                                            | 2.578                              | 1.245                                                   | 1.198                                     | 1.665                                          | 1.117                                        | 1.990                                                   | 2.320                                              | 2.201                            | 1.594                                   | 1.112                                               | 0.484                           | 0.432                                       | 0.642                                                  | 0.610                                                  |
| <b>Mean</b>                           | <b>2.369</b>                    | <b>2.038</b>                                       | <b>0.500</b>                    | <b>0.335</b>                     | <b>0.542</b>                                | <b>1.692</b>                      | <b>1.555</b>                                   | <b>1.459</b>                                   | <b>2.592</b>                                     | <b>2.622</b>                       | <b>1.223</b>                                            | <b>1.181</b>                              | <b>1.658</b>                                   | <b>1.090</b>                                 | <b>1.965</b>                                            | <b>2.201</b>                                       | <b>2.251</b>                     | <b>1.561</b>                            | <b>1.052</b>                                        | <b>0.493</b>                    | <b>0.430</b>                                | <b>0.633</b>                                           | <b>0.616</b>                                           |
| <b>SD</b>                             | <b>0.092</b>                    | <b>0.037</b>                                       | <b>0.005</b>                    | <b>0.012</b>                     | <b>0.008</b>                                | <b>0.029</b>                      | <b>0.012</b>                                   | <b>0.023</b>                                   | <b>0.095</b>                                     | <b>0.056</b>                       | <b>0.017</b>                                            | <b>0.021</b>                              | <b>0.024</b>                                   | <b>0.016</b>                                 | <b>0.031</b>                                            | <b>0.067</b>                                       | <b>0.040</b>                     | <b>0.019</b>                            | <b>0.029</b>                                        | <b>0.009</b>                    | <b>0.010</b>                                | <b>0.006</b>                                           | <b>0.013</b>                                           |
| <b>%RSD</b>                           | <b>3.9</b>                      | <b>1.8</b>                                         | <b>0.9</b>                      | <b>3.5</b>                       | <b>1.4</b>                                  | <b>1.7</b>                        | <b>0.74</b>                                    | <b>1.6</b>                                     | <b>3.7</b>                                       | <b>2.1</b>                         | <b>1.4</b>                                              | <b>1.7</b>                                | <b>1.5</b>                                     | <b>1.5</b>                                   | <b>1.6</b>                                              | <b>3.0</b>                                         | <b>1.8</b>                       | <b>1.2</b>                              | <b>2.7</b>                                          | <b>1.9</b>                      | <b>2.3</b>                                  | <b>1.0</b>                                             | <b>2.1</b>                                             |

**Table S12d.** SIFT-MS repeatability data for Mix 1 in 50% DMAC:50% water at three levels (50, 250, and 500).

| Level—Replicate<br>Number; Statistics | Acetone<br>(NO <sup>+</sup> 88) | Acetonitrile<br>(H <sub>3</sub> O <sup>+</sup> 42) | Benzene<br>(NO <sup>+</sup> 78) | Benzene<br>(NO <sup>+</sup> 108) | Benzene<br>(O <sub>2</sub> <sup>+</sup> 78) | 1-Butanol<br>(NO <sup>+</sup> 73) | Chloroform<br>(O <sub>2</sub> <sup>+</sup> 83) | Chloroform<br>(O <sub>2</sub> <sup>+</sup> 85) | Isooctane<br>(H <sub>3</sub> O <sup>+</sup> 113) | Isooctane<br>(NO <sup>+</sup> 113) | Isopropyl alcohol<br>(H <sub>3</sub> O <sup>+</sup> 43) | Isopropyl alcohol<br>(NO <sup>+</sup> 59) | Methanol<br>(H <sub>3</sub> O <sup>+</sup> 33) | Methyl ethyl ketone<br>(NO <sup>+</sup> 102) | Methyl ethyl ketone<br>(O <sub>2</sub> <sup>+</sup> 72) | Nitromethane<br>(H <sub>3</sub> O <sup>+</sup> 62) | Propanal<br>(NO <sup>+</sup> 57) | Tetrahydrofuran<br>(NO <sup>+</sup> 71) | Tetrahydrofuran<br>(O <sub>2</sub> <sup>+</sup> 71) | Toluene<br>(NO <sup>+</sup> 92) | Toluene<br>(O <sub>2</sub> <sup>+</sup> 92) | Trichloroethylene<br>(O <sub>2</sub> <sup>+</sup> 130) | Trichloroethylene<br>(O <sub>2</sub> <sup>+</sup> 132) |
|---------------------------------------|---------------------------------|----------------------------------------------------|---------------------------------|----------------------------------|---------------------------------------------|-----------------------------------|------------------------------------------------|------------------------------------------------|--------------------------------------------------|------------------------------------|---------------------------------------------------------|-------------------------------------------|------------------------------------------------|----------------------------------------------|---------------------------------------------------------|----------------------------------------------------|----------------------------------|-----------------------------------------|-----------------------------------------------------|---------------------------------|---------------------------------------------|--------------------------------------------------------|--------------------------------------------------------|
| 50–1                                  | 0.310                           | 0.187                                              | 0.046                           | 0.006                            | 0.033                                       | 0.099                             | 0.008                                          | 0.015                                          | -0.152                                           | 0.003                              | 0.106                                                   | 0.108                                     | 0.202                                          | 0.081                                        | 0.139                                                   | 0.147                                              | 0.020                            | 0.152                                   | 0.086                                               | 0.004                           | 0.002                                       | 0.003                                                  | 0.005                                                  |
| 50–2                                  | 0.344                           | 0.189                                              | 0.043                           | 0.007                            | 0.032                                       | 0.098                             | 0.009                                          | 0.024                                          | -0.136                                           | 0.004                              | 0.108                                                   | 0.104                                     | 0.211                                          | 0.081                                        | 0.145                                                   | 0.152                                              | 0.022                            | 0.159                                   | 0.083                                               | 0.003                           | 0.003                                       | 0.003                                                  | 0.003                                                  |
| 50–3                                  | 0.384                           | 0.186                                              | 0.035                           | 0.006                            | 0.024                                       | 0.100                             | 0.007                                          | 0.009                                          | -0.165                                           | 0.004                              | 0.112                                                   | 0.104                                     | 0.189                                          | 0.077                                        | 0.153                                                   | 0.155                                              | 0.022                            | 0.154                                   | 0.087                                               | 0.003                           | 0.002                                       | 0.001                                                  | 0.002                                                  |
| 50–4                                  | 0.379                           | 0.185                                              | 0.031                           | 0.006                            | 0.022                                       | 0.101                             | 0.005                                          | 0.011                                          | -0.189                                           | 0.003                              | 0.106                                                   | 0.104                                     | 0.201                                          | 0.077                                        | 0.136                                                   | 0.152                                              | 0.023                            | 0.158                                   | 0.086                                               | 0.002                           | 0.001                                       | 0.002                                                  | 0.002                                                  |
| 50–5                                  | 0.383                           | 0.183                                              | 0.027                           | 0.003                            | 0.021                                       | 0.101                             | 0.005                                          | 0.006                                          | -0.238                                           | 0.000                              | 0.113                                                   | 0.105                                     | 0.198                                          | 0.079                                        | 0.146                                                   | 0.150                                              | 0.019                            | 0.152                                   | 0.089                                               | 0.003                           | 0.003                                       | 0.002                                                  | 0.004                                                  |
| 50–6                                  | 0.330                           | 0.170                                              | 0.027                           | 0.004                            | 0.020                                       | 0.099                             | 0.003                                          | 0.008                                          | -0.208                                           | 0.000                              | 0.108                                                   | 0.100                                     | 0.196                                          | 0.076                                        | 0.142                                                   | 0.147                                              | 0.019                            | 0.146                                   | 0.081                                               | 0.002                           | 0.003                                       | 0.002                                                  | 0.004                                                  |
| <b>Mean</b>                           | <b>0.355</b>                    | <b>0.183</b>                                       | <b>0.035</b>                    | <b>0.005</b>                     | <b>0.025</b>                                | <b>0.100</b>                      | <b>0.006</b>                                   | <b>0.012</b>                                   | <b>-0.181</b>                                    | <b>0.002</b>                       | <b>0.109</b>                                            | <b>0.105</b>                              | <b>0.199</b>                                   | <b>0.078</b>                                 | <b>0.144</b>                                            | <b>0.150</b>                                       | <b>0.021</b>                     | <b>0.153</b>                            | <b>0.085</b>                                        | <b>0.003</b>                    | <b>0.002</b>                                | <b>0.002</b>                                           | <b>0.003</b>                                           |
| <b>SD</b>                             | <b>0.0288</b>                   | <b>0.0062</b>                                      | <b>0.0074</b>                   | <b>0.0013</b>                    | <b>0.0052</b>                               | <b>0.0011</b>                     | <b>0.0022</b>                                  | <b>0.0060</b>                                  | <b>0.0346</b>                                    | <b>0.0016</b>                      | <b>0.0027</b>                                           | <b>0.0023</b>                             | <b>0.0067</b>                                  | <b>0.0019</b>                                | <b>0.0054</b>                                           | <b>0.0029</b>                                      | <b>0.0017</b>                    | <b>0.0043</b>                           | <b>0.0026</b>                                       | <b>0.0006</b>                   | <b>0.0005</b>                               | <b>0.0007</b>                                          | <b>0.0011</b>                                          |
| <b>%RSD</b>                           | <b>8.1</b>                      | <b>3.4</b>                                         | <b>21.1</b>                     | <b>23.7</b>                      | <b>20.6</b>                                 | <b>1.1</b>                        | <b>36.8</b>                                    | <b>49.2</b>                                    | <b>-19.1</b>                                     | <b>66.2</b>                        | <b>2.5</b>                                              | <b>2.2</b>                                | <b>3.3</b>                                     | <b>2.5</b>                                   | <b>3.8</b>                                              | <b>1.9</b>                                         | <b>8.0</b>                       | <b>2.8</b>                              | <b>3.1</b>                                          | <b>20.7</b>                     | <b>20.0</b>                                 | <b>30.3</b>                                            | <b>36.0</b>                                            |
| 250–1                                 | 1.481                           | 1.007                                              | 0.074                           | 0.035                            | 0.064                                       | 0.525                             | 0.136                                          | 0.142                                          | 0.186                                            | 0.178                              | 0.586                                                   | 0.567                                     | 1.096                                          | 0.451                                        | 0.832                                                   | 0.825                                              | 0.258                            | 0.904                                   | 0.590                                               | 0.047                           | 0.034                                       | 0.049                                                  | 0.044                                                  |
| 250–2                                 | 1.451                           | 0.934                                              | 0.072                           | 0.032                            | 0.062                                       | 0.472                             | 0.134                                          | 0.119                                          | 0.000                                            | 0.187                              | 0.536                                                   | 0.526                                     | 0.992                                          | 0.419                                        | 0.785                                                   | 0.773                                              | 0.243                            | 0.837                                   | 0.514                                               | 0.042                           | 0.033                                       | 0.041                                                  | 0.044                                                  |
| 250–3                                 | 1.411                           | 0.930                                              | 0.062                           | 0.032                            | 0.061                                       | 0.475                             | 0.125                                          | 0.127                                          | 0.146                                            | 0.186                              | 0.533                                                   | 0.510                                     | 0.978                                          | 0.414                                        | 0.755                                                   | 0.762                                              | 0.253                            | 0.827                                   | 0.530                                               | 0.040                           | 0.029                                       | 0.039                                                  | 0.042                                                  |
| 250–4                                 | 1.391                           | 0.912                                              | 0.063                           | 0.031                            | 0.058                                       | 0.482                             | 0.121                                          | 0.127                                          | 0.076                                            | 0.177                              | 0.536                                                   | 0.537                                     | 0.945                                          | 0.406                                        | 0.768                                                   | 0.766                                              | 0.251                            | 0.829                                   | 0.514                                               | 0.041                           | 0.031                                       | 0.048                                                  | 0.041                                                  |
| 250–5                                 | 1.371                           | 0.919                                              | 0.064                           | 0.035                            | 0.058                                       | 0.468                             | 0.127                                          | 0.126                                          | 0.010                                            | 0.174                              | 0.517                                                   | 0.499                                     | 0.961                                          | 0.411                                        | 0.746                                                   | 0.740                                              | 0.252                            | 0.800                                   | 0.518                                               | 0.039                           | 0.031                                       | 0.040                                                  | 0.043                                                  |
| 250–6                                 | 1.331                           | 0.911                                              | 0.060                           | 0.036                            | 0.055                                       | 0.468                             | 0.121                                          | 0.131                                          | 0.036                                            | 0.176                              | 0.530                                                   | 0.503                                     | 0.982                                          | 0.403                                        | 0.745                                                   | 0.748                                              | 0.237                            | 0.817                                   | 0.504                                               | 0.039                           | 0.031                                       | 0.042                                                  | 0.046                                                  |
| <b>Mean</b>                           | <b>1.406</b>                    | <b>0.935</b>                                       | <b>0.066</b>                    | <b>0.034</b>                     | <b>0.060</b>                                | <b>0.482</b>                      | <b>0.127</b>                                   | <b>0.129</b>                                   | <b>0.076</b>                                     | <b>0.179</b>                       | <b>0.540</b>                                            | <b>0.524</b>                              | <b>0.992</b>                                   | <b>0.418</b>                                 | <b>0.772</b>                                            | <b>0.769</b>                                       | <b>0.249</b>                     | <b>0.835</b>                            | <b>0.528</b>                                        | <b>0.041</b>                    | <b>0.031</b>                                | <b>0.043</b>                                           | <b>0.043</b>                                           |
| <b>SD</b>                             | <b>0.050</b>                    | <b>0.033</b>                                       | <b>0.005</b>                    | <b>0.002</b>                     | <b>0.003</b>                                | <b>0.020</b>                      | <b>0.006</b>                                   | <b>0.007</b>                                   | <b>0.069</b>                                     | <b>0.005</b>                       | <b>0.022</b>                                            | <b>0.023</b>                              | <b>0.049</b>                                   | <b>0.016</b>                                 | <b>0.030</b>                                            | <b>0.027</b>                                       | <b>0.007</b>                     | <b>0.033</b>                            | <b>0.029</b>                                        | <b>0.003</b>                    | <b>0.002</b>                                | <b>0.004</b>                                           | <b>0.002</b>                                           |
| <b>%RSD</b>                           | <b>3.5</b>                      | <b>3.5</b>                                         | <b>7.7</b>                      | <b>5.8</b>                       | <b>5.1</b>                                  | <b>4.1</b>                        | <b>4.6</b>                                     | <b>5.4</b>                                     | <b>91.5</b>                                      | <b>2.8</b>                         | <b>4.0</b>                                              | <b>4.5</b>                                | <b>4.9</b>                                     | <b>3.8</b>                                   | <b>3.9</b>                                              | <b>3.6</b>                                         | <b>2.8</b>                       | <b>3.9</b>                              | <b>5.4</b>                                          | <b>6.6</b>                      | <b>5.6</b>                                  | <b>9.1</b>                                             | <b>3.6</b>                                             |
| 500–1                                 | 2.771                           | 1.757                                              | 0.145                           | 0.092                            | 0.152                                       | 0.899                             | 0.363                                          | 0.358                                          | 0.576                                            | 0.605                              | 1.004                                                   | 0.946                                     | 1.846                                          | 0.781                                        | 1.438                                                   | 1.420                                              | 0.688                            | 1.621                                   | 1.021                                               | 0.109                           | 0.089                                       | 0.137                                                  | 0.126                                                  |
| 500–2                                 | 2.821                           | 1.787                                              | 0.153                           | 0.097                            | 0.157                                       | 0.928                             | 0.373                                          | 0.359                                          | 0.466                                            | 0.610                              | 0.994                                                   | 0.996                                     | 1.846                                          | 0.808                                        | 1.488                                                   | 1.460                                              | 0.703                            | 1.611                                   | 1.071                                               | 0.114                           | 0.092                                       | 0.148                                                  | 0.134                                                  |
| 500–3                                 | 2.501                           | 1.737                                              | 0.146                           | 0.096                            | 0.143                                       | 0.905                             | 0.374                                          | 0.364                                          | 0.556                                            | 0.602                              | 0.987                                                   | 0.953                                     | 1.726                                          | 0.784                                        | 1.488                                                   | 1.480                                              | 0.718                            | 1.571                                   | 1.031                                               | 0.108                           | 0.090                                       | 0.144                                                  | 0.127                                                  |
| 500–4                                 | 2.611                           | 1.797                                              | 0.146                           | 0.095                            | 0.153                                       | 0.934                             | 0.384                                          | 0.368                                          | 0.576                                            | 0.603                              | 1.014                                                   | 0.958                                     | 1.776                                          | 0.793                                        | 1.518                                                   | 1.500                                              | 0.716                            | 1.621                                   | 1.071                                               | 0.117                           | 0.091                                       | 0.140                                                  | 0.130                                                  |
| 500–5                                 | 2.691                           | 1.797                                              | 0.151                           | 0.086                            | 0.160                                       | 0.906                             | 0.383                                          | 0.389                                          | 0.586                                            | 0.627                              | 1.024                                                   | 0.968                                     | 1.796                                          | 0.800                                        | 1.528                                                   | 1.500                                              | 0.727                            | 1.631                                   | 1.051                                               | 0.114                           | 0.090                                       | 0.136                                                  | 0.131                                                  |
| 500–6                                 | 2.971                           | 1.867                                              | 0.223                           | 0.110                            | 0.210                                       | 0.952                             | 0.405                                          | 0.398                                          | 0.596                                            | 0.665                              | 1.044                                                   | 1.036                                     | 1.916                                          | 0.864                                        | 1.598                                                   | 1.480                                              | 0.741                            | 1.681                                   | 1.121                                               | 0.126                           | 0.101                                       | 0.148                                                  | 0.148                                                  |
| <b>Mean</b>                           | <b>2.728</b>                    | <b>1.790</b>                                       | <b>0.161</b>                    | <b>0.096</b>                     | <b>0.162</b>                                | <b>0.921</b>                      | <b>0.380</b>                                   | <b>0.373</b>                                   | <b>0.559</b>                                     | <b>0.618</b>                       | <b>1.011</b>                                            | <b>0.977</b>                              | <b>1.817</b>                                   | <b>0.805</b>                                 | <b>1.510</b>                                            | <b>1.473</b>                                       | <b>0.716</b>                     | <b>1.622</b>                            | <b>1.061</b>                                        | <b>0.115</b>                    | <b>0.092</b>                                | <b>0.142</b>                                           | <b>0.132</b>                                           |
| <b>SD</b>                             | <b>0.151</b>                    | <b>0.041</b>                                       | <b>0.028</b>                    | <b>0.007</b>                     | <b>0.022</b>                                | <b>0.019</b>                      | <b>0.013</b>                                   | <b>0.015</b>                                   | <b>0.043</b>                                     | <b>0.022</b>                       | <b>0.019</b>                                            | <b>0.031</b>                              | <b>0.060</b>                                   | <b>0.028</b>                                 | <b>0.049</b>                                            | <b>0.027</b>                                       | <b>0.017</b>                     | <b>0.032</b>                            | <b>0.033</b>                                        | <b>0.006</b>                    | <b>0.004</b>                                | <b>0.005</b>                                           | <b>0.007</b>                                           |
| <b>%RSD</b>                           | <b>5.5</b>                      | <b>2.3</b>                                         | <b>17.5</b>                     | <b>7.5</b>                       | <b>13.5</b>                                 | <b>2.1</b>                        | <b>3.4</b>                                     | <b>4.1</b>                                     | <b>7.8</b>                                       | <b>3.6</b>                         | <b>1.9</b>                                              | <b>3.2</b>                                | <b>3.3</b>                                     | <b>3.5</b>                                   | <b>3.2</b>                                              | <b>1.9</b>                                         | <b>2.4</b>                       | <b>2.0</b>                              | <b>3.1</b>                                          | <b>5.2</b>                      | <b>4.5</b>                                  | <b>3.4</b>                                             | <b>5.5</b>                                             |



**Table S13.** SIFT-MS repeatability data for the Mix 1 in 5% DMF:95% water at three levels (50, 250, and 500).

| Level—Replicate<br>Number; Statistics | Acetone<br>(NO <sup>+</sup> 88) | Acetonitrile<br>(H <sub>3</sub> O <sup>+</sup> 42) | Benzene<br>(NO <sup>+</sup> 78) | Benzene<br>(NO <sup>+</sup> 108) | Benzene<br>(O <sub>2</sub> <sup>+</sup> 78) | 1-Butanol<br>(NO <sup>+</sup> 73) | Chloroform<br>(O <sub>2</sub> <sup>+</sup> 83) | Chloroform<br>(O <sub>2</sub> <sup>+</sup> 85) | Isooctane<br>(H <sub>3</sub> O <sup>+</sup> 113) | Isooctane<br>(NO <sup>+</sup> 113) | Isopropyl alcohol<br>(H <sub>3</sub> O <sup>+</sup> 43) | Isopropyl alcohol<br>(NO <sup>+</sup> 59) | Methanol<br>(H <sub>3</sub> O <sup>+</sup> 33) | Methyl ethyl ketone<br>(NO <sup>+</sup> 102) | Methyl ethyl ketone<br>(O <sub>2</sub> <sup>+</sup> 72) | Nitromethane<br>(H <sub>3</sub> O <sup>+</sup> 62) | Propanal<br>(NO <sup>+</sup> 57) | Tetrahydrofuran<br>(NO <sup>+</sup> 71) | Tetrahydrofuran<br>(O <sub>2</sub> <sup>+</sup> 71) | Toluene<br>(NO <sup>+</sup> 92) | Toluene<br>(O <sub>2</sub> <sup>+</sup> 92) | Trichloroethylene<br>(O <sub>2</sub> <sup>+</sup> 130) | Trichloroethylene<br>(O <sub>2</sub> <sup>+</sup> 132) |
|---------------------------------------|---------------------------------|----------------------------------------------------|---------------------------------|----------------------------------|---------------------------------------------|-----------------------------------|------------------------------------------------|------------------------------------------------|--------------------------------------------------|------------------------------------|---------------------------------------------------------|-------------------------------------------|------------------------------------------------|----------------------------------------------|---------------------------------------------------------|----------------------------------------------------|----------------------------------|-----------------------------------------|-----------------------------------------------------|---------------------------------|---------------------------------------------|--------------------------------------------------------|--------------------------------------------------------|
| 50–1                                  | 0.342                           | 0.296                                              | 0.049                           | 0.081                            | 0.077                                       | 0.070                             | 0.375                                          | 0.321                                          | 0.322                                            | 0.340                              | 0.191                                                   | 0.151                                     | 0.222                                          | 0.159                                        | 0.247                                                   | 0.289                                              | 0.316                            | 0.271                                   | 0.176                                               | 0.152                           | 0.130                                       | 0.176                                                  | 0.170                                                  |
| 50–2                                  | 0.325                           | 0.290                                              | 0.031                           | 0.073                            | 0.066                                       | 0.152                             | 0.375                                          | 0.341                                          | 0.337                                            | 0.351                              | 0.192                                                   | 0.151                                     | 0.224                                          | 0.155                                        | 0.257                                                   | 0.288                                              | 0.302                            | 0.255                                   | 0.172                                               | 0.158                           | 0.130                                       | 0.166                                                  | 0.165                                                  |
| 50–3                                  | 0.327                           | 0.283                                              | 0.024                           | 0.076                            | 0.062                                       | 0.189                             | 0.366                                          | 0.331                                          | 0.285                                            | 0.351                              | 0.194                                                   | 0.155                                     | 0.226                                          | 0.163                                        | 0.256                                                   | 0.272                                              | 0.318                            | 0.259                                   | 0.169                                               | 0.154                           | 0.123                                       | 0.166                                                  | 0.169                                                  |
| 50–4                                  | 0.315                           | 0.295                                              | 0.004                           | 0.065                            | 0.048                                       | 0.194                             | 0.364                                          | 0.341                                          | 0.307                                            | 0.341                              | 0.185                                                   | 0.151                                     | 0.215                                          | 0.155                                        | 0.253                                                   | 0.282                                              | 0.313                            | 0.263                                   | 0.172                                               | 0.149                           | 0.127                                       | 0.164                                                  | 0.174                                                  |
| 50–5                                  | 0.340                           | 0.305                                              | 0.013                           | 0.079                            | 0.054                                       | 0.230                             | 0.387                                          | 0.340                                          | 0.350                                            | 0.339                              | 0.211                                                   | 0.166                                     | 0.245                                          | 0.175                                        | 0.277                                                   | 0.302                                              | 0.325                            | 0.273                                   | 0.181                                               | 0.156                           | 0.136                                       | 0.177                                                  | 0.167                                                  |
| 50–6                                  | 0.320                           | 0.299                                              | -0.001                          | 0.081                            | 0.054                                       | 0.182                             | 0.376                                          | 0.339                                          | 0.317                                            | 0.347                              | 0.193                                                   | 0.154                                     | 0.222                                          | 0.163                                        | 0.258                                                   | 0.287                                              | 0.310                            | 0.263                                   | 0.180                                               | 0.151                           | 0.129                                       | 0.174                                                  | 0.169                                                  |
| <b>Mean</b>                           | <b>0.328</b>                    | <b>0.295</b>                                       | <b>0.020</b>                    | <b>0.076</b>                     | <b>0.060</b>                                | <b>0.170</b>                      | <b>0.373</b>                                   | <b>0.336</b>                                   | <b>0.320</b>                                     | <b>0.345</b>                       | <b>0.195</b>                                            | <b>0.155</b>                              | <b>0.226</b>                                   | <b>0.162</b>                                 | <b>0.258</b>                                            | <b>0.286</b>                                       | <b>0.314</b>                     | <b>0.264</b>                            | <b>0.175</b>                                        | <b>0.154</b>                    | <b>0.129</b>                                | <b>0.171</b>                                           | <b>0.169</b>                                           |
| <b>SD</b>                             | <b>0.0099</b>                   | <b>0.0069</b>                                      | <b>0.0170</b>                   | <b>0.0055</b>                    | <b>0.0095</b>                               | <b>0.0500</b>                     | <b>0.0075</b>                                  | <b>0.0073</b>                                  | <b>0.0208</b>                                    | <b>0.0050</b>                      | <b>0.0080</b>                                           | <b>0.0053</b>                             | <b>0.0093</b>                                  | <b>0.0068</b>                                | <b>0.0092</b>                                           | <b>0.0089</b>                                      | <b>0.0071</b>                    | <b>0.0063</b>                           | <b>0.0044</b>                                       | <b>0.0030</b>                   | <b>0.0039</b>                               | <b>0.0053</b>                                          | <b>0.0028</b>                                          |
| <b>%RSD</b>                           | <b>3.0</b>                      | <b>2.3</b>                                         | <b>84.8</b>                     | <b>7.3</b>                       | <b>15.8</b>                                 | <b>29.5</b>                       | <b>2.0</b>                                     | <b>2.2</b>                                     | <b>6.5</b>                                       | <b>1.5</b>                         | <b>4.1</b>                                              | <b>3.4</b>                                | <b>4.1</b>                                     | <b>4.2</b>                                   | <b>3.6</b>                                              | <b>3.1</b>                                         | <b>2.3</b>                       | <b>2.4</b>                              | <b>2.5</b>                                          | <b>2.0</b>                      | <b>3.0</b>                                  | <b>3.1</b>                                             | <b>1.6</b>                                             |
| 250–1                                 | 1.552                           | 1.420                                              | 0.507                           | 0.413                            | 0.589                                       | 1.480                             | 1.670                                          | 1.527                                          | 1.686                                            | 1.598                              | 0.943                                                   | 0.757                                     | 1.094                                          | 0.783                                        | 1.324                                                   | 1.389                                              | 1.445                            | 1.286                                   | 0.867                                               | 0.700                           | 0.599                                       | 0.782                                                  | 0.765                                                  |
| 250–2                                 | 1.592                           | 1.430                                              | 0.492                           | 0.407                            | 0.572                                       | 1.420                             | 1.730                                          | 1.527                                          | 1.706                                            | 1.578                              | 0.932                                                   | 0.730                                     | 1.124                                          | 0.784                                        | 1.314                                                   | 1.339                                              | 1.445                            | 1.296                                   | 0.866                                               | 0.695                           | 0.600                                       | 0.753                                                  | 0.747                                                  |
| 250–3                                 | 1.592                           | 1.460                                              | 0.536                           | 0.413                            | 0.588                                       | 1.550                             | 1.760                                          | 1.577                                          | 1.726                                            | 1.608                              | 0.956                                                   | 0.748                                     | 1.144                                          | 0.794                                        | 1.364                                                   | 1.399                                              | 1.455                            | 1.296                                   | 0.891                                               | 0.714                           | 0.618                                       | 0.787                                                  | 0.751                                                  |
| 250–4                                 | 1.612                           | 1.480                                              | 0.500                           | 0.411                            | 0.589                                       | 1.430                             | 1.740                                          | 1.577                                          | 1.676                                            | 1.608                              | 0.958                                                   | 0.761                                     | 1.134                                          | 0.777                                        | 1.354                                                   | 1.419                                              | 1.465                            | 1.316                                   | 0.866                                               | 0.701                           | 0.606                                       | 0.761                                                  | 0.744                                                  |
| 250–5                                 | 1.622                           | 1.480                                              | 0.557                           | 0.411                            | 0.605                                       | 1.720                             | 1.760                                          | 1.597                                          | 1.676                                            | 1.598                              | 0.986                                                   | 0.768                                     | 1.164                                          | 0.823                                        | 1.364                                                   | 1.419                                              | 1.455                            | 1.326                                   | 0.910                                               | 0.702                           | 0.617                                       | 0.776                                                  | 0.737                                                  |
| 250–6                                 | 1.622                           | 1.470                                              | 0.512                           | 0.417                            | 0.588                                       | 1.440                             | 1.730                                          | 1.557                                          | 1.766                                            | 1.548                              | 0.959                                                   | 0.764                                     | 1.144                                          | 0.803                                        | 1.354                                                   | 1.409                                              | 1.435                            | 1.346                                   | 0.874                                               | 0.703                           | 0.603                                       | 0.774                                                  | 0.752                                                  |
| <b>Mean</b>                           | <b>1.599</b>                    | <b>1.457</b>                                       | <b>0.517</b>                    | <b>0.412</b>                     | <b>0.589</b>                                | <b>1.507</b>                      | <b>1.731</b>                                   | <b>1.560</b>                                   | <b>1.706</b>                                     | <b>1.590</b>                       | <b>0.956</b>                                            | <b>0.755</b>                              | <b>1.134</b>                                   | <b>0.794</b>                                 | <b>1.345</b>                                            | <b>1.395</b>                                       | <b>1.450</b>                     | <b>1.311</b>                            | <b>0.879</b>                                        | <b>0.703</b>                    | <b>0.607</b>                                | <b>0.772</b>                                           | <b>0.750</b>                                           |
| <b>SD</b>                             | <b>0.024</b>                    | <b>0.024</b>                                       | <b>0.022</b>                    | <b>0.003</b>                     | <b>0.010</b>                                | <b>0.105</b>                      | <b>0.030</b>                                   | <b>0.026</b>                                   | <b>0.032</b>                                     | <b>0.021</b>                       | <b>0.017</b>                                            | <b>0.013</b>                              | <b>0.022</b>                                   | <b>0.015</b>                                 | <b>0.020</b>                                            | <b>0.027</b>                                       | <b>0.010</b>                     | <b>0.021</b>                            | <b>0.016</b>                                        | <b>0.006</b>                    | <b>0.008</b>                                | <b>0.012</b>                                           | <b>0.009</b>                                           |
| <b>%RSD</b>                           | <b>1.5</b>                      | <b>1.6</b>                                         | <b>4.3</b>                      | <b>0.73</b>                      | <b>1.6</b>                                  | <b>7.0</b>                        | <b>1.7</b>                                     | <b>1.7</b>                                     | <b>1.9</b>                                       | <b>1.3</b>                         | <b>1.7</b>                                              | <b>1.7</b>                                | <b>1.9</b>                                     | <b>1.9</b>                                   | <b>1.4</b>                                              | <b>2.0</b>                                         | <b>0.66</b>                      | <b>1.6</b>                              | <b>1.9</b>                                          | <b>0.82</b>                     | <b>1.3</b>                                  | <b>1.5</b>                                             | <b>1.1</b>                                             |
| 500–1                                 | 3.272                           | 2.940                                              | 1.246                           | 0.924                            | 1.420                                       | 2.810                             | 3.650                                          | 3.317                                          | 3.776                                            | 3.368                              | 1.914                                                   | 1.556                                     | 2.284                                          | 1.605                                        | 2.714                                                   | 2.709                                              | 2.995                            | 2.616                                   | 1.805                                               | 1.507                           | 1.297                                       | 1.688                                                  | 1.638                                                  |
| 500–2                                 | 3.212                           | 3.040                                              | 1.266                           | 0.968                            | 1.400                                       | 2.770                             | 3.780                                          | 3.397                                          | 3.736                                            | 3.428                              | 1.944                                                   | 1.566                                     | 2.324                                          | 1.635                                        | 2.774                                                   | 2.809                                              | 3.045                            | 2.716                                   | 1.835                                               | 1.527                           | 1.337                                       | 1.708                                                  | 1.648                                                  |
| 500–3                                 | 3.222                           | 3.000                                              | 1.226                           | 0.959                            | 1.420                                       | 2.740                             | 3.670                                          | 3.467                                          | 3.906                                            | 3.308                              | 1.934                                                   | 1.536                                     | 2.274                                          | 1.615                                        | 2.724                                                   | 2.799                                              | 3.015                            | 2.646                                   | 1.865                                               | 1.517                           | 1.357                                       | 1.718                                                  | 1.658                                                  |
| 500–4                                 | 3.182                           | 2.880                                              | 1.236                           | 0.932                            | 1.390                                       | 2.690                             | 3.640                                          | 3.297                                          | 3.776                                            | 3.408                              | 1.874                                                   | 1.496                                     | 2.194                                          | 1.575                                        | 2.664                                                   | 2.739                                              | 3.055                            | 2.576                                   | 1.795                                               | 1.477                           | 1.317                                       | 1.728                                                  | 1.638                                                  |
| 500–5                                 | 3.222                           | 2.930                                              | 1.236                           | 0.917                            | 1.380                                       | 2.950                             | 3.740                                          | 3.387                                          | 3.626                                            | 3.308                              | 1.944                                                   | 1.536                                     | 2.234                                          | 1.635                                        | 2.764                                                   | 2.759                                              | 2.965                            | 2.596                                   | 1.895                                               | 1.477                           | 1.337                                       | 1.688                                                  | 1.658                                                  |
| 500–6                                 | 3.112                           | 2.850                                              | 1.206                           | 0.908                            | 1.340                                       | 2.530                             | 3.670                                          | 3.257                                          | 3.666                                            | 3.208                              | 1.864                                                   | 1.446                                     | 2.064                                          | 1.525                                        | 2.674                                                   | 2.729                                              | 2.965                            | 2.546                                   | 1.765                                               | 1.467                           | 1.337                                       | 1.638                                                  | 1.638                                                  |
| <b>Mean</b>                           | <b>3.204</b>                    | <b>2.940</b>                                       | <b>1.236</b>                    | <b>0.934</b>                     | <b>1.392</b>                                | <b>2.748</b>                      | <b>3.691</b>                                   | <b>3.354</b>                                   | <b>3.748</b>                                     | <b>3.338</b>                       | <b>1.913</b>                                            | <b>1.523</b>                              | <b>2.229</b>                                   | <b>1.598</b>                                 | <b>2.719</b>                                            | <b>2.757</b>                                       | <b>3.006</b>                     | <b>2.616</b>                            | <b>1.827</b>                                        | <b>1.496</b>                    | <b>1.331</b>                                | <b>1.695</b>                                           | <b>1.647</b>                                           |
| <b>SD</b>                             | <b>0.049</b>                    | <b>0.065</b>                                       | <b>0.018</b>                    | <b>0.022</b>                     | <b>0.027</b>                                | <b>0.127</b>                      | <b>0.051</b>                                   | <b>0.070</b>                                   | <b>0.090</b>                                     | <b>0.074</b>                       | <b>0.032</b>                                            | <b>0.041</b>                              | <b>0.084</b>                                   | <b>0.039</b>                                 | <b>0.041</b>                                            | <b>0.036</b>                                       | <b>0.035</b>                     | <b>0.054</b>                            | <b>0.044</b>                                        | <b>0.023</b>                    | <b>0.019</b>                                | <b>0.029</b>                                           | <b>0.009</b>                                           |
| <b>%RSD</b>                           | <b>1.5</b>                      | <b>2.2</b>                                         | <b>1.5</b>                      | <b>2.3</b>                       | <b>2.0</b>                                  | <b>4.6</b>                        | <b>1.4</b>                                     | <b>2.1</b>                                     | <b>2.4</b>                                       | <b>2.2</b>                         | <b>1.7</b>                                              | <b>2.7</b>                                | <b>3.8</b>                                     | <b>2.4</b>                                   | <b>1.5</b>                                              | <b>1.3</b>                                         | <b>1.2</b>                       | <b>2.1</b>                              | <b>2.4</b>                                          | <b>1.5</b>                      | <b>1.4</b>                                  | <b>1.7</b>                                             | <b>0.55</b>                                            |

**Table S14a.** SIFT-MS repeatability data for the Mix 1 in 5% DMI:95% water at three levels (50, 250, and 500).

| Level—Replicate<br>Number; Statistics | Acetone<br>(NO <sup>+</sup> 88) | Acetonitrile<br>(H <sub>3</sub> O <sup>+</sup> 42) | Benzene<br>(NO <sup>+</sup> 78) | Benzene<br>(NO <sup>+</sup> 108) | Benzene<br>(O <sub>2</sub> <sup>+</sup> 78) | 1-Butanol<br>(NO <sup>+</sup> 73) | Chloroform<br>(O <sub>2</sub> <sup>+</sup> 83) | Chloroform<br>(O <sub>2</sub> <sup>+</sup> 85) | Isooctane<br>(H <sub>3</sub> O <sup>+</sup> 113) | Isooctane<br>(NO <sup>+</sup> 113) | Isopropyl alcohol<br>(H <sub>3</sub> O <sup>+</sup> 43) | Isopropyl alcohol<br>(NO <sup>+</sup> 59) | Methanol<br>(H <sub>3</sub> O <sup>+</sup> 33) | Methyl ethyl ketone<br>(NO <sup>+</sup> 102) | Methyl ethyl ketone<br>(O <sub>2</sub> <sup>+</sup> 72) | Nitromethane<br>(H <sub>3</sub> O <sup>+</sup> 62) | Propanal<br>(NO <sup>+</sup> 57) | Tetrahydrofuran<br>(NO <sup>+</sup> 71) | Tetrahydrofuran<br>(O <sub>2</sub> <sup>+</sup> 71) | Toluene<br>(NO <sup>+</sup> 92) | Toluene<br>(O <sub>2</sub> <sup>+</sup> 92) | Trichloroethylene<br>(O <sub>2</sub> <sup>+</sup> 130) | Trichloroethylene<br>(O <sub>2</sub> <sup>+</sup> 132) |
|---------------------------------------|---------------------------------|----------------------------------------------------|---------------------------------|----------------------------------|---------------------------------------------|-----------------------------------|------------------------------------------------|------------------------------------------------|--------------------------------------------------|------------------------------------|---------------------------------------------------------|-------------------------------------------|------------------------------------------------|----------------------------------------------|---------------------------------------------------------|----------------------------------------------------|----------------------------------|-----------------------------------------|-----------------------------------------------------|---------------------------------|---------------------------------------------|--------------------------------------------------------|--------------------------------------------------------|
| 50–1                                  | 0.338                           | 0.291                                              | 0.152                           | 0.109                            | 0.174                                       | 0.264                             | 0.373                                          | 0.357                                          | 0.282                                            | 0.304                              | 0.192                                                   | 0.155                                     | 0.244                                          | 0.173                                        | 0.275                                                   | 0.257                                              | 0.288                            | 0.268                                   | 0.178                                               | 0.161                           | 0.133                                       | 0.180                                                  | 0.162                                                  |
| 50–2                                  | 0.322                           | 0.295                                              | 0.156                           | 0.108                            | 0.168                                       | 0.271                             | 0.389                                          | 0.354                                          | 0.256                                            | 0.286                              | 0.193                                                   | 0.155                                     | 0.225                                          | 0.164                                        | 0.273                                                   | 0.272                                              | 0.291                            | 0.272                                   | 0.173                                               | 0.160                           | 0.140                                       | 0.176                                                  | 0.171                                                  |
| 50–3                                  | 0.362                           | 0.302                                              | 0.165                           | 0.108                            | 0.171                                       | 0.277                             | 0.398                                          | 0.366                                          | 0.268                                            | 0.297                              | 0.181                                                   | 0.161                                     | 0.251                                          | 0.177                                        | 0.273                                                   | 0.263                                              | 0.278                            | 0.286                                   | 0.182                                               | 0.159                           | 0.139                                       | 0.172                                                  | 0.182                                                  |
| 50–4                                  | 0.326                           | 0.285                                              | 0.152                           | 0.093                            | 0.156                                       | 0.263                             | 0.390                                          | 0.350                                          | 0.298                                            | 0.286                              | 0.191                                                   | 0.150                                     | 0.224                                          | 0.162                                        | 0.272                                                   | 0.283                                              | 0.293                            | 0.261                                   | 0.163                                               | 0.154                           | 0.134                                       | 0.171                                                  | 0.164                                                  |
| 50–5                                  | 0.334                           | 0.284                                              | 0.162                           | 0.108                            | 0.164                                       | 0.256                             | 0.402                                          | 0.353                                          | 0.327                                            | 0.303                              | 0.187                                                   | 0.155                                     | 0.241                                          | 0.163                                        | 0.266                                                   | 0.265                                              | 0.298                            | 0.271                                   | 0.175                                               | 0.148                           | 0.133                                       | 0.173                                                  | 0.169                                                  |
| 50–6                                  | 0.336                           | 0.293                                              | 0.170                           | 0.104                            | 0.179                                       | 0.275                             | 0.400                                          | 0.345                                          | 0.280                                            | 0.310                              | 0.191                                                   | 0.155                                     | 0.238                                          | 0.169                                        | 0.278                                                   | 0.267                                              | 0.292                            | 0.283                                   | 0.176                                               | 0.151                           | 0.139                                       | 0.164                                                  | 0.178                                                  |
| <b>Mean</b>                           | <b>0.336</b>                    | <b>0.292</b>                                       | <b>0.160</b>                    | <b>0.105</b>                     | <b>0.169</b>                                | <b>0.268</b>                      | <b>0.392</b>                                   | <b>0.354</b>                                   | <b>0.285</b>                                     | <b>0.298</b>                       | <b>0.189</b>                                            | <b>0.156</b>                              | <b>0.237</b>                                   | <b>0.168</b>                                 | <b>0.272</b>                                            | <b>0.268</b>                                       | <b>0.290</b>                     | <b>0.273</b>                            | <b>0.174</b>                                        | <b>0.155</b>                    | <b>0.136</b>                                | <b>0.172</b>                                           | <b>0.171</b>                                           |
| <b>SD</b>                             | <b>0.0128</b>                   | <b>0.0061</b>                                      | <b>0.0067</b>                   | <b>0.0056</b>                    | <b>0.0073</b>                               | <b>0.0073</b>                     | <b>0.0098</b>                                  | <b>0.0065</b>                                  | <b>0.0227</b>                                    | <b>0.0091</b>                      | <b>0.0041</b>                                           | <b>0.0032</b>                             | <b>0.0098</b>                                  | <b>0.0055</b>                                | <b>0.0036</b>                                           | <b>0.0081</b>                                      | <b>0.0061</b>                    | <b>0.0086</b>                           | <b>0.0059</b>                                       | <b>0.0049</b>                   | <b>0.0030</b>                               | <b>0.0049</b>                                          | <b>0.0071</b>                                          |
| <b>%RSD</b>                           | <b>3.8</b>                      | <b>2.1</b>                                         | <b>4.2</b>                      | <b>5.3</b>                       | <b>4.4</b>                                  | <b>2.7</b>                        | <b>2.5</b>                                     | <b>1.8</b>                                     | <b>8.0</b>                                       | <b>3.0</b>                         | <b>2.2</b>                                              | <b>2.0</b>                                | <b>4.1</b>                                     | <b>3.3</b>                                   | <b>1.3</b>                                              | <b>3.0</b>                                         | <b>2.1</b>                       | <b>3.1</b>                              | <b>3.4</b>                                          | <b>3.1</b>                      | <b>2.2</b>                                  | <b>2.8</b>                                             | <b>4.2</b>                                             |
| 250–1                                 | 1.710                           | 1.457                                              | 0.765                           | 0.456                            | 0.783                                       | 1.282                             | 1.801                                          | 1.629                                          | 1.547                                            | 1.501                              | 0.917                                                   | 0.772                                     | 1.209                                          | 0.825                                        | 1.318                                                   | 1.229                                              | 1.350                            | 1.313                                   | 0.875                                               | 0.735                           | 0.638                                       | 0.800                                                  | 0.795                                                  |
| 250–2                                 | 1.570                           | 1.417                                              | 0.697                           | 0.470                            | 0.735                                       | 1.242                             | 1.741                                          | 1.579                                          | 1.547                                            | 1.411                              | 0.912                                                   | 0.741                                     | 1.129                                          | 0.785                                        | 1.288                                                   | 1.289                                              | 1.320                            | 1.263                                   | 0.854                                               | 0.714                           | 0.611                                       | 0.759                                                  | 0.766                                                  |
| 250–3                                 | 1.640                           | 1.397                                              | 0.710                           | 0.445                            | 0.757                                       | 1.252                             | 1.751                                          | 1.569                                          | 1.507                                            | 1.421                              | 0.893                                                   | 0.748                                     | 1.159                                          | 0.804                                        | 1.288                                                   | 1.249                                              | 1.330                            | 1.263                                   | 0.834                                               | 0.706                           | 0.611                                       | 0.784                                                  | 0.770                                                  |
| 250–4                                 | 1.710                           | 1.497                                              | 0.774                           | 0.493                            | 0.790                                       | 1.312                             | 1.781                                          | 1.659                                          | 1.477                                            | 1.501                              | 0.916                                                   | 0.780                                     | 1.259                                          | 0.842                                        | 1.298                                                   | 1.229                                              | 1.340                            | 1.333                                   | 0.881                                               | 0.727                           | 0.631                                       | 0.785                                                  | 0.758                                                  |
| 250–5                                 | 1.640                           | 1.427                                              | 0.712                           | 0.448                            | 0.743                                       | 1.242                             | 1.751                                          | 1.589                                          | 1.487                                            | 1.471                              | 0.912                                                   | 0.736                                     | 1.169                                          | 0.810                                        | 1.258                                                   | 1.209                                              | 1.340                            | 1.273                                   | 0.865                                               | 0.697                           | 0.605                                       | 0.777                                                  | 0.752                                                  |
| 250–6                                 | 1.630                           | 1.447                                              | 0.789                           | 0.452                            | 0.800                                       | 1.222                             | 1.721                                          | 1.609                                          | 1.467                                            | 1.491                              | 0.903                                                   | 0.747                                     | 1.159                                          | 0.789                                        | 1.298                                                   | 1.239                                              | 1.320                            | 1.283                                   | 0.864                                               | 0.704                           | 0.625                                       | 0.786                                                  | 0.781                                                  |
| <b>Mean</b>                           | <b>1.650</b>                    | <b>1.441</b>                                       | <b>0.741</b>                    | <b>0.461</b>                     | <b>0.768</b>                                | <b>1.259</b>                      | <b>1.758</b>                                   | <b>1.606</b>                                   | <b>1.505</b>                                     | <b>1.466</b>                       | <b>0.908</b>                                            | <b>0.754</b>                              | <b>1.181</b>                                   | <b>0.809</b>                                 | <b>1.291</b>                                            | <b>1.241</b>                                       | <b>1.333</b>                     | <b>1.288</b>                            | <b>0.862</b>                                        | <b>0.713</b>                    | <b>0.620</b>                                | <b>0.781</b>                                           | <b>0.770</b>                                           |
| <b>SD</b>                             | <b>0.049</b>                    | <b>0.032</b>                                       | <b>0.036</b>                    | <b>0.017</b>                     | <b>0.024</b>                                | <b>0.030</b>                      | <b>0.026</b>                                   | <b>0.031</b>                                   | <b>0.032</b>                                     | <b>0.037</b>                       | <b>0.008</b>                                            | <b>0.016</b>                              | <b>0.042</b>                                   | <b>0.020</b>                                 | <b>0.018</b>                                            | <b>0.025</b>                                       | <b>0.011</b>                     | <b>0.026</b>                            | <b>0.015</b>                                        | <b>0.013</b>                    | <b>0.012</b>                                | <b>0.012</b>                                           | <b>0.014</b>                                           |
| <b>%RSD</b>                           | <b>2.9</b>                      | <b>2.2</b>                                         | <b>4.8</b>                      | <b>3.6</b>                       | <b>3.2</b>                                  | <b>2.4</b>                        | <b>1.5</b>                                     | <b>1.9</b>                                     | <b>2.1</b>                                       | <b>2.5</b>                         | <b>0.92</b>                                             | <b>2.1</b>                                | <b>3.6</b>                                     | <b>2.4</b>                                   | <b>1.4</b>                                              | <b>2.0</b>                                         | <b>0.83</b>                      | <b>2.0</b>                              | <b>1.8</b>                                          | <b>1.9</b>                      | <b>1.9</b>                                  | <b>1.6</b>                                             | <b>1.9</b>                                             |
| 500–1                                 | 3.470                           | 3.087                                              | 1.615                           | 1.041                            | 1.702                                       | 2.592                             | 3.831                                          | 3.559                                          | 3.397                                            | 3.081                              | 1.874                                                   | 1.604                                     | 2.519                                          | 1.718                                        | 2.778                                                   | 2.499                                              | 2.800                            | 2.763                                   | 1.855                                               | 1.550                           | 1.397                                       | 1.810                                                  | 1.708                                                  |
| 500–2                                 | 3.180                           | 2.867                                              | 1.465                           | 0.971                            | 1.622                                       | 2.462                             | 3.661                                          | 3.349                                          | 3.197                                            | 3.071                              | 1.794                                                   | 1.464                                     | 2.289                                          | 1.608                                        | 2.608                                                   | 2.489                                              | 2.800                            | 2.553                                   | 1.775                                               | 1.500                           | 1.337                                       | 1.690                                                  | 1.688                                                  |
| 500–3                                 | 3.150                           | 2.917                                              | 1.425                           | 1.021                            | 1.592                                       | 2.552                             | 3.661                                          | 3.429                                          | 3.327                                            | 2.991                              | 1.854                                                   | 1.524                                     | 2.269                                          | 1.578                                        | 2.688                                                   | 2.689                                              | 2.780                            | 2.603                                   | 1.785                                               | 1.480                           | 1.357                                       | 1.660                                                  | 1.658                                                  |
| 500–4                                 | 3.650                           | 3.277                                              | 1.595                           | 1.061                            | 1.742                                       | 2.752                             | 3.981                                          | 3.619                                          | 3.407                                            | 3.061                              | 1.974                                                   | 1.694                                     | 2.669                                          | 1.818                                        | 2.928                                                   | 2.709                                              | 2.840                            | 2.943                                   | 1.985                                               | 1.600                           | 1.437                                       | 1.750                                                  | 1.758                                                  |
| 500–5                                 | 3.190                           | 2.867                                              | 1.455                           | 1.011                            | 1.582                                       | 2.392                             | 3.651                                          | 3.379                                          | 3.227                                            | 3.061                              | 1.714                                                   | 1.474                                     | 2.319                                          | 1.608                                        | 2.638                                                   | 2.369                                              | 2.770                            | 2.573                                   | 1.735                                               | 1.480                           | 1.367                                       | 1.690                                                  | 1.668                                                  |
| 500–6                                 | 3.190                           | 2.927                                              | 1.535                           | 0.991                            | 1.652                                       | 2.402                             | 3.651                                          | 3.369                                          | 3.137                                            | 2.971                              | 1.754                                                   | 1.504                                     | 2.379                                          | 1.608                                        | 2.588                                                   | 2.339                                              | 2.700                            | 2.603                                   | 1.775                                               | 1.450                           | 1.307                                       | 1.640                                                  | 1.588                                                  |
| <b>Mean</b>                           | <b>3.305</b>                    | <b>2.991</b>                                       | <b>1.515</b>                    | <b>1.016</b>                     | <b>1.649</b>                                | <b>2.525</b>                      | <b>3.739</b>                                   | <b>3.451</b>                                   | <b>3.282</b>                                     | <b>3.039</b>                       | <b>1.827</b>                                            | <b>1.544</b>                              | <b>2.408</b>                                   | <b>1.657</b>                                 | <b>2.704</b>                                            | <b>2.516</b>                                       | <b>2.781</b>                     | <b>2.673</b>                            | <b>1.818</b>                                        | <b>1.510</b>                    | <b>1.367</b>                                | <b>1.706</b>                                           | <b>1.678</b>                                           |
| <b>SD</b>                             | <b>0.188</b>                    | <b>0.148</b>                                       | <b>0.072</b>                    | <b>0.030</b>                     | <b>0.058</b>                                | <b>0.125</b>                      | <b>0.126</b>                                   | <b>0.102</b>                                   | <b>0.102</b>                                     | <b>0.042</b>                       | <b>0.085</b>                                            | <b>0.081</b>                              | <b>0.143</b>                                   | <b>0.085</b>                                 | <b>0.118</b>                                            | <b>0.142</b>                                       | <b>0.043</b>                     | <b>0.139</b>                            | <b>0.083</b>                                        | <b>0.050</b>                    | <b>0.042</b>                                | <b>0.057</b>                                           | <b>0.052</b>                                           |
| <b>%RSD</b>                           | <b>5.7</b>                      | <b>4.9</b>                                         | <b>4.7</b>                      | <b>2.9</b>                       | <b>3.5</b>                                  | <b>4.9</b>                        | <b>3.4</b>                                     | <b>3.0</b>                                     | <b>3.1</b>                                       | <b>1.4</b>                         | <b>4.7</b>                                              | <b>5.2</b>                                | <b>5.9</b>                                     | <b>5.1</b>                                   | <b>4.3</b>                                              | <b>5.6</b>                                         | <b>1.5</b>                       | <b>5.2</b>                              | <b>4.5</b>                                          | <b>3.3</b>                      | <b>3.0</b>                                  | <b>3.4</b>                                             | <b>3.1</b>                                             |

**Table S14b.** SIFT-MS repeatability data for Mix 1 in 10% DMI:90% water at three levels (50, 250, and 500).

| Level—Replicate<br>Number; Statistics | Acetone<br>(NO <sup>+</sup> 88) | Acetonitrile<br>(H <sub>3</sub> O <sup>+</sup> 42) | Benzene<br>(NO <sup>+</sup> 78) | Benzene<br>(NO <sup>+</sup> 108) | Benzene<br>(O <sub>2</sub> <sup>+</sup> 78) | 1-Butanol<br>(NO <sup>+</sup> 73) | Chloroform<br>(O <sub>2</sub> <sup>+</sup> 83) | Chloroform<br>(O <sub>2</sub> <sup>+</sup> 85) | Isooctane<br>(H <sub>3</sub> O <sup>+</sup> 113) | Isooctane<br>(NO <sup>+</sup> 113) | Isopropyl alcohol<br>(H <sub>3</sub> O <sup>+</sup> 43) | Isopropyl alcohol<br>(NO <sup>+</sup> 59) | Methanol<br>(H <sub>3</sub> O <sup>+</sup> 33) | Methyl ethyl ketone<br>(NO <sup>+</sup> 102) | Methyl ethyl ketone<br>(O <sub>2</sub> <sup>+</sup> 72) | Nitromethane<br>(H <sub>3</sub> O <sup>+</sup> 62) | Propanal<br>(NO <sup>+</sup> 57) | Tetrahydrofuran<br>(NO <sup>+</sup> 71) | Tetrahydrofuran<br>(O <sub>2</sub> <sup>+</sup> 71) | Toluene<br>(NO <sup>+</sup> 92) | Toluene<br>(O <sub>2</sub> <sup>+</sup> 92) | Trichloroethylene<br>(O <sub>2</sub> <sup>+</sup> 130) | Trichloroethylene<br>(O <sub>2</sub> <sup>+</sup> 132) |
|---------------------------------------|---------------------------------|----------------------------------------------------|---------------------------------|----------------------------------|---------------------------------------------|-----------------------------------|------------------------------------------------|------------------------------------------------|--------------------------------------------------|------------------------------------|---------------------------------------------------------|-------------------------------------------|------------------------------------------------|----------------------------------------------|---------------------------------------------------------|----------------------------------------------------|----------------------------------|-----------------------------------------|-----------------------------------------------------|---------------------------------|---------------------------------------------|--------------------------------------------------------|--------------------------------------------------------|
| 50–1                                  | 0.265                           | 0.276                                              | 0.071                           | 0.065                            | 0.077                                       | 0.250                             | 0.215                                          | 0.221                                          | 0.621                                            | 0.328                              | 0.161                                                   | 0.134                                     | 0.249                                          | 0.131                                        | 0.280                                                   | 0.280                                              | 0.264                            | 0.260                                   | 0.184                                               | 0.108                           | 0.086                                       | 0.088                                                  | 0.075                                                  |
| 50–2                                  | 0.261                           | 0.280                                              | 0.081                           | 0.071                            | 0.076                                       | 0.258                             | 0.215                                          | 0.226                                          | 0.591                                            | 0.329                              | 0.172                                                   | 0.136                                     | 0.253                                          | 0.135                                        | 0.274                                                   | 0.286                                              | 0.257                            | 0.267                                   | 0.184                                               | 0.109                           | 0.089                                       | 0.082                                                  | 0.079                                                  |
| 50–3                                  | 0.272                           | 0.277                                              | 0.075                           | 0.066                            | 0.080                                       | 0.251                             | 0.225                                          | 0.221                                          | 0.562                                            | 0.333                              | 0.164                                                   | 0.131                                     | 0.251                                          | 0.135                                        | 0.279                                                   | 0.287                                              | 0.262                            | 0.264                                   | 0.180                                               | 0.106                           | 0.087                                       | 0.083                                                  | 0.082                                                  |
| 50–4                                  | 0.272                           | 0.279                                              | 0.078                           | 0.057                            | 0.086                                       | 0.250                             | 0.211                                          | 0.223                                          | 0.540                                            | 0.332                              | 0.171                                                   | 0.139                                     | 0.256                                          | 0.131                                        | 0.283                                                   | 0.284                                              | 0.262                            | 0.267                                   | 0.179                                               | 0.110                           | 0.089                                       | 0.091                                                  | 0.083                                                  |
| 50–5                                  | 0.263                           | 0.274                                              | 0.075                           | 0.066                            | 0.078                                       | 0.261                             | 0.218                                          | 0.215                                          | 0.459                                            | 0.343                              | 0.167                                                   | 0.135                                     | 0.245                                          | 0.136                                        | 0.288                                                   | 0.299                                              | 0.258                            | 0.261                                   | 0.184                                               | 0.103                           | 0.089                                       | 0.087                                                  | 0.075                                                  |
| 50–6                                  | 0.270                           | 0.283                                              | 0.076                           | 0.060                            | 0.077                                       | 0.263                             | 0.218                                          | 0.221                                          | 0.619                                            | 0.358                              | 0.174                                                   | 0.138                                     | 0.259                                          | 0.133                                        | 0.296                                                   | 0.282                                              | 0.259                            | 0.270                                   | 0.190                                               | 0.107                           | 0.088                                       | 0.081                                                  | 0.078                                                  |
| <b>Mean</b>                           | <b>0.267</b>                    | <b>0.278</b>                                       | <b>0.076</b>                    | <b>0.064</b>                     | <b>0.079</b>                                | <b>0.256</b>                      | <b>0.217</b>                                   | <b>0.222</b>                                   | <b>0.565</b>                                     | <b>0.337</b>                       | <b>0.168</b>                                            | <b>0.135</b>                              | <b>0.252</b>                                   | <b>0.133</b>                                 | <b>0.283</b>                                            | <b>0.286</b>                                       | <b>0.261</b>                     | <b>0.265</b>                            | <b>0.184</b>                                        | <b>0.108</b>                    | <b>0.088</b>                                | <b>0.085</b>                                           | <b>0.078</b>                                           |
| <b>SD</b>                             | <b>0.0044</b>                   | <b>0.0029</b>                                      | <b>0.0031</b>                   | <b>0.0046</b>                    | <b>0.0033</b>                               | <b>0.0054</b>                     | <b>0.0043</b>                                  | <b>0.0033</b>                                  | <b>0.0557</b>                                    | <b>0.0105</b>                      | <b>0.0046</b>                                           | <b>0.0026</b>                             | <b>0.0046</b>                                  | <b>0.0020</b>                                | <b>0.0071</b>                                           | <b>0.0061</b>                                      | <b>0.0025</b>                    | <b>0.0035</b>                           | <b>0.0035</b>                                       | <b>0.0023</b>                   | <b>0.0010</b>                               | <b>0.0036</b>                                          | <b>0.0030</b>                                          |
| <b>%RSD</b>                           | <b>1.6</b>                      | <b>1.0</b>                                         | <b>4.0</b>                      | <b>7.1</b>                       | <b>4.2</b>                                  | <b>2.1</b>                        | <b>2.0</b>                                     | <b>1.5</b>                                     | <b>9.8</b>                                       | <b>3.1</b>                         | <b>2.7</b>                                              | <b>1.9</b>                                | <b>1.8</b>                                     | <b>1.5</b>                                   | <b>2.5</b>                                              | <b>2.1</b>                                         | <b>0.96</b>                      | <b>1.3</b>                              | <b>1.9</b>                                          | <b>2.1</b>                      | <b>1.1</b>                                  | <b>4.2</b>                                             | <b>3.9</b>                                             |
| 250–1                                 | 1.318                           | 1.361                                              | 0.442                           | 0.302                            | 0.461                                       | 1.198                             | 1.230                                          | 1.136                                          | 2.012                                            | 1.665                              | 0.780                                                   | 0.672                                     | 1.088                                          | 0.649                                        | 1.245                                                   | 1.340                                              | 1.507                            | 1.148                                   | 0.757                                               | 0.493                           | 0.422                                       | 0.471                                                  | 0.462                                                  |
| 250–2                                 | 1.298                           | 1.361                                              | 0.431                           | 0.308                            | 0.465                                       | 1.218                             | 1.210                                          | 1.146                                          | 2.172                                            | 1.705                              | 0.808                                                   | 0.669                                     | 1.068                                          | 0.648                                        | 1.225                                                   | 1.390                                              | 1.537                            | 1.138                                   | 0.743                                               | 0.486                           | 0.412                                       | 0.466                                                  | 0.469                                                  |
| 250–3                                 | 1.308                           | 1.381                                              | 0.426                           | 0.302                            | 0.448                                       | 1.218                             | 1.180                                          | 1.116                                          | 2.132                                            | 1.645                              | 0.800                                                   | 0.666                                     | 1.058                                          | 0.643                                        | 1.215                                                   | 1.400                                              | 1.417                            | 1.138                                   | 0.739                                               | 0.472                           | 0.401                                       | 0.462                                                  | 0.455                                                  |
| 250–4                                 | 1.278                           | 1.301                                              | 0.420                           | 0.288                            | 0.450                                       | 1.178                             | 1.160                                          | 1.096                                          | 2.012                                            | 1.575                              | 0.764                                                   | 0.638                                     | 1.008                                          | 0.611                                        | 1.205                                                   | 1.380                                              | 1.437                            | 1.088                                   | 0.717                                               | 0.461                           | 0.385                                       | 0.436                                                  | 0.454                                                  |
| 250–5                                 | 1.358                           | 1.401                                              | 0.433                           | 0.282                            | 0.448                                       | 1.258                             | 1.210                                          | 1.126                                          | 2.112                                            | 1.635                              | 0.810                                                   | 0.692                                     | 1.098                                          | 0.660                                        | 1.265                                                   | 1.370                                              | 1.407                            | 1.148                                   | 0.774                                               | 0.481                           | 0.407                                       | 0.460                                                  | 0.464                                                  |
| 250–6                                 | 2.988                           | 3.141                                              | 1.169                           | 0.764                            | 1.219                                       | 2.798                             | 3.130                                          | 2.816                                          | 5.082                                            | 4.205                              | 1.767                                                   | 1.519                                     | 2.238                                          | 1.510                                        | 2.825                                                   | 3.270                                              | 3.757                            | 2.608                                   | 1.766                                               | 1.199                           | 1.039                                       | 1.230                                                  | 1.208                                                  |
| <b>Mean</b>                           | <b>1.312</b>                    | <b>1.361</b>                                       | <b>0.430</b>                    | <b>0.296</b>                     | <b>0.454</b>                                | <b>1.214</b>                      | <b>1.198</b>                                   | <b>1.124</b>                                   | <b>2.088</b>                                     | <b>1.645</b>                       | <b>0.793</b>                                            | <b>0.667</b>                              | <b>1.064</b>                                   | <b>0.642</b>                                 | <b>1.231</b>                                            | <b>1.376</b>                                       | <b>1.461</b>                     | <b>1.132</b>                            | <b>0.746</b>                                        | <b>0.479</b>                    | <b>0.406</b>                                | <b>0.459</b>                                           | <b>0.461</b>                                           |
| <b>SD</b>                             | <b>0.027</b>                    | <b>0.033</b>                                       | <b>0.007</b>                    | <b>0.010</b>                     | <b>0.007</b>                                | <b>0.027</b>                      | <b>0.025</b>                                   | <b>0.017</b>                                   | <b>0.065</b>                                     | <b>0.042</b>                       | <b>0.018</b>                                            | <b>0.017</b>                              | <b>0.031</b>                                   | <b>0.017</b>                                 | <b>0.022</b>                                            | <b>0.021</b>                                       | <b>0.052</b>                     | <b>0.022</b>                            | <b>0.019</b>                                        | <b>0.011</b>                    | <b>0.012</b>                                | <b>0.012</b>                                           | <b>0.006</b>                                           |
| <b>%RSD</b>                           | <b>2.0</b>                      | <b>2.5</b>                                         | <b>1.7</b>                      | <b>3.3</b>                       | <b>1.6</b>                                  | <b>2.2</b>                        | <b>2.1</b>                                     | <b>1.5</b>                                     | <b>3.1</b>                                       | <b>2.6</b>                         | <b>2.2</b>                                              | <b>2.6</b>                                | <b>2.9</b>                                     | <b>2.6</b>                                   | <b>1.7</b>                                              | <b>1.5</b>                                         | <b>3.5</b>                       | <b>2.0</b>                              | <b>2.5</b>                                          | <b>2.3</b>                      | <b>3.0</b>                                  | <b>2.6</b>                                             | <b>1.2</b>                                             |
| 500–1                                 | 3.008                           | 3.171                                              | 1.029                           | 0.674                            | 1.099                                       | 2.728                             | 2.850                                          | 2.666                                          | 4.112                                            | 3.465                              | 1.767                                                   | 1.499                                     | 2.378                                          | 1.450                                        | 2.735                                                   | 3.060                                              | 3.167                            | 2.488                                   | 1.696                                               | 1.089                           | 0.938                                       | 1.090                                                  | 1.068                                                  |
| 500–2                                 | 2.778                           | 2.951                                              | 1.009                           | 0.653                            | 1.069                                       | 2.558                             | 2.710                                          | 2.566                                          | 4.412                                            | 3.685                              | 1.647                                                   | 1.389                                     | 2.248                                          | 1.370                                        | 2.555                                                   | 2.830                                              | 3.357                            | 2.358                                   | 1.616                                               | 1.059                           | 0.922                                       | 1.090                                                  | 1.058                                                  |
| 500–3                                 | 2.518                           | 2.591                                              | 0.922                           | 0.596                            | 0.967                                       | 2.298                             | 2.510                                          | 2.316                                          | 4.052                                            | 3.325                              | 1.497                                                   | 1.259                                     | 2.018                                          | 1.230                                        | 2.325                                                   | 2.660                                              | 2.977                            | 2.128                                   | 1.446                                               | 0.958                           | 0.839                                       | 0.969                                                  | 0.948                                                  |
| 500–4                                 | 2.538                           | 2.591                                              | 0.922                           | 0.621                            | 0.999                                       | 2.318                             | 2.540                                          | 2.376                                          | 4.152                                            | 3.595                              | 1.507                                                   | 1.269                                     | 1.928                                          | 1.250                                        | 2.345                                                   | 2.660                                              | 3.187                            | 2.128                                   | 1.486                                               | 0.984                           | 0.861                                       | 1.020                                                  | 0.997                                                  |
| 500–5                                 | 2.578                           | 2.751                                              | 0.928                           | 0.618                            | 1.009                                       | 2.388                             | 2.570                                          | 2.456                                          | 4.452                                            | 3.625                              | 1.567                                                   | 1.299                                     | 2.108                                          | 1.280                                        | 2.425                                                   | 2.670                                              | 3.227                            | 2.228                                   | 1.496                                               | 1.009                           | 0.872                                       | 1.020                                                  | 0.993                                                  |
| 500–6                                 | 2.548                           | 2.681                                              | 0.930                           | 0.596                            | 0.970                                       | 2.408                             | 2.510                                          | 2.286                                          | 4.202                                            | 3.405                              | 1.557                                                   | 1.289                                     | 1.968                                          | 1.260                                        | 2.365                                                   | 2.800                                              | 3.057                            | 2.178                                   | 1.476                                               | 0.980                           | 0.838                                       | 0.997                                                  | 0.984                                                  |
| <b>Mean</b>                           | <b>2.661</b>                    | <b>2.789</b>                                       | <b>0.956</b>                    | <b>0.626</b>                     | <b>1.019</b>                                | <b>2.450</b>                      | <b>2.615</b>                                   | <b>2.445</b>                                   | <b>4.230</b>                                     | <b>3.516</b>                       | <b>1.590</b>                                            | <b>1.334</b>                              | <b>2.108</b>                                   | <b>1.306</b>                                 | <b>2.458</b>                                            | <b>2.780</b>                                       | <b>3.162</b>                     | <b>2.251</b>                            | <b>1.536</b>                                        | <b>1.014</b>                    | <b>0.879</b>                                | <b>1.031</b>                                           | <b>1.008</b>                                           |
| <b>SD</b>                             | <b>0.178</b>                    | <b>0.210</b>                                       | <b>0.045</b>                    | <b>0.029</b>                     | <b>0.049</b>                                | <b>0.150</b>                      | <b>0.125</b>                                   | <b>0.136</b>                                   | <b>0.150</b>                                     | <b>0.128</b>                       | <b>0.093</b>                                            | <b>0.085</b>                              | <b>0.159</b>                                   | <b>0.078</b>                                 | <b>0.145</b>                                            | <b>0.143</b>                                       | <b>0.121</b>                     | <b>0.131</b>                            | <b>0.089</b>                                        | <b>0.046</b>                    | <b>0.039</b>                                | <b>0.045</b>                                           | <b>0.042</b>                                           |
| <b>%RSD</b>                           | <b>6.7</b>                      | <b>7.5</b>                                         | <b>4.7</b>                      | <b>4.6</b>                       | <b>4.8</b>                                  | <b>6.1</b>                        | <b>4.8</b>                                     | <b>5.5</b>                                     | <b>3.5</b>                                       | <b>3.6</b>                         | <b>5.8</b>                                              | <b>6.4</b>                                | <b>7.6</b>                                     | <b>6.0</b>                                   | <b>5.9</b>                                              | <b>5.1</b>                                         | <b>3.8</b>                       | <b>5.8</b>                              | <b>5.8</b>                                          | <b>4.6</b>                      | <b>4.4</b>                                  | <b>4.4</b>                                             | <b>4.2</b>                                             |

**Table S14c.** SIFT-MS repeatability data for Mix 1 in 25% DMI:75% water at three levels (50, 250, and 500).

| Level-Replicate<br>Number; Statistics | Acetone<br>(NO <sup>+</sup> 88) | Acetonitrile<br>(H <sub>3</sub> O <sup>+</sup> 42) | Benzene<br>(NO <sup>+</sup> 78) | Benzene<br>(NO <sup>+</sup> 108) | Benzene<br>(O <sub>2</sub> <sup>+</sup> 78) | 1-Butanol<br>(NO <sup>+</sup> 73) | Chloroform<br>(O <sub>2</sub> <sup>+</sup> 83) | Chloroform<br>(O <sub>2</sub> <sup>+</sup> 85) | Isooctane<br>(H <sub>3</sub> O <sup>+</sup> 113) | Isooctane<br>(NO <sup>+</sup> 113) | Isopropyl alcohol<br>(H <sub>3</sub> O <sup>+</sup> 43) | Isopropyl alcohol<br>(NO <sup>+</sup> 59) | Methanol<br>(H <sub>3</sub> O <sup>+</sup> 33) | Methyl ethyl ketone<br>(NO <sup>+</sup> 102) | Methyl ethyl ketone<br>(O <sub>2</sub> <sup>+</sup> 72) | Nitromethane<br>(H <sub>3</sub> O <sup>+</sup> 62) | Propanal<br>(NO <sup>+</sup> 57) | Tetrahydrofuran<br>(NO <sup>+</sup> 71) | Tetrahydrofuran<br>(O <sub>2</sub> <sup>+</sup> 71) | Toluene<br>(NO <sup>+</sup> 92) | Toluene<br>(O <sub>2</sub> <sup>+</sup> 92) | Trichloroethylene<br>(O <sub>2</sub> <sup>+</sup> 130) | Trichloroethylene<br>(O <sub>2</sub> <sup>+</sup> 132) |
|---------------------------------------|---------------------------------|----------------------------------------------------|---------------------------------|----------------------------------|---------------------------------------------|-----------------------------------|------------------------------------------------|------------------------------------------------|--------------------------------------------------|------------------------------------|---------------------------------------------------------|-------------------------------------------|------------------------------------------------|----------------------------------------------|---------------------------------------------------------|----------------------------------------------------|----------------------------------|-----------------------------------------|-----------------------------------------------------|---------------------------------|---------------------------------------------|--------------------------------------------------------|--------------------------------------------------------|
| 50-1                                  | 0.337                           | 0.321                                              | 0.073                           | 0.062                            | 0.081                                       | 0.308                             | 0.206                                          | 0.212                                          | 0.586                                            | 0.319                              | 0.197                                                   | 0.172                                     | 0.303                                          | 0.161                                        | 0.344                                                   | 0.339                                              | 0.240                            | 0.329                                   | 0.220                                               | 0.109                           | 0.093                                       | 0.081                                                  | 0.069                                                  |
| 50-2                                  | 0.300                           | 0.296                                              | 0.071                           | 0.057                            | 0.078                                       | 0.284                             | 0.213                                          | 0.209                                          | 0.546                                            | 0.320                              | 0.184                                                   | 0.144                                     | 0.260                                          | 0.141                                        | 0.316                                                   | 0.327                                              | 0.263                            | 0.289                                   | 0.188                                               | 0.104                           | 0.087                                       | 0.080                                                  | 0.069                                                  |
| 50-3                                  | 0.296                           | 0.299                                              | 0.066                           | 0.063                            | 0.071                                       | 0.278                             | 0.193                                          | 0.186                                          | 0.502                                            | 0.305                              | 0.180                                                   | 0.150                                     | 0.279                                          | 0.145                                        | 0.306                                                   | 0.312                                              | 0.248                            | 0.286                                   | 0.197                                               | 0.102                           | 0.087                                       | 0.074                                                  | 0.071                                                  |
| 50-4                                  | 0.321                           | 0.315                                              | 0.072                           | 0.067                            | 0.074                                       | 0.306                             | 0.200                                          | 0.205                                          | 0.541                                            | 0.308                              | 0.190                                                   | 0.160                                     | 0.281                                          | 0.162                                        | 0.333                                                   | 0.334                                              | 0.234                            | 0.312                                   | 0.204                                               | 0.106                           | 0.084                                       | 0.073                                                  | 0.068                                                  |
| 50-5                                  | 0.302                           | 0.304                                              | 0.068                           | 0.060                            | 0.069                                       | 0.292                             | 0.205                                          | 0.194                                          | 0.539                                            | 0.293                              | 0.188                                                   | 0.151                                     | 0.271                                          | 0.150                                        | 0.317                                                   | 0.327                                              | 0.231                            | 0.288                                   | 0.193                                               | 0.099                           | 0.083                                       | 0.070                                                  | 0.062                                                  |
| 50-6                                  | 0.331                           | 0.315                                              | 0.074                           | 0.068                            | 0.075                                       | 0.313                             | 0.198                                          | 0.209                                          | 0.536                                            | 0.320                              | 0.198                                                   | 0.165                                     | 0.291                                          | 0.155                                        | 0.329                                                   | 0.337                                              | 0.247                            | 0.311                                   | 0.207                                               | 0.109                           | 0.089                                       | 0.070                                                  | 0.080                                                  |
| <b>Mean</b>                           | <b>0.314</b>                    | <b>0.308</b>                                       | <b>0.071</b>                    | <b>0.063</b>                     | <b>0.075</b>                                | <b>0.297</b>                      | <b>0.202</b>                                   | <b>0.203</b>                                   | <b>0.542</b>                                     | <b>0.311</b>                       | <b>0.190</b>                                            | <b>0.157</b>                              | <b>0.281</b>                                   | <b>0.152</b>                                 | <b>0.324</b>                                            | <b>0.329</b>                                       | <b>0.244</b>                     | <b>0.303</b>                            | <b>0.201</b>                                        | <b>0.104</b>                    | <b>0.087</b>                                | <b>0.075</b>                                           | <b>0.070</b>                                           |
| <b>SD</b>                             | <b>0.0160</b>                   | <b>0.0092</b>                                      | <b>0.0030</b>                   | <b>0.0036</b>                    | <b>0.0038</b>                               | <b>0.0130</b>                     | <b>0.0064</b>                                  | <b>0.0094</b>                                  | <b>0.0245</b>                                    | <b>0.0100</b>                      | <b>0.0065</b>                                           | <b>0.0096</b>                             | <b>0.0137</b>                                  | <b>0.0078</b>                                | <b>0.0125</b>                                           | <b>0.0090</b>                                      | <b>0.0106</b>                    | <b>0.0160</b>                           | <b>0.0104</b>                                       | <b>0.0037</b>                   | <b>0.0035</b>                               | <b>0.0043</b>                                          | <b>0.0053</b>                                          |
| <b>%RSD</b>                           | <b>5.1</b>                      | <b>3.0</b>                                         | <b>4.3</b>                      | <b>5.8</b>                       | <b>5.0</b>                                  | <b>4.4</b>                        | <b>3.2</b>                                     | <b>4.6</b>                                     | <b>4.5</b>                                       | <b>3.2</b>                         | <b>3.4</b>                                              | <b>6.1</b>                                | <b>4.9</b>                                     | <b>5.1</b>                                   | <b>3.9</b>                                              | <b>2.7</b>                                         | <b>4.3</b>                       | <b>5.3</b>                              | <b>5.2</b>                                          | <b>3.5</b>                      | <b>4.1</b>                                  | <b>5.8</b>                                             | <b>7.7</b>                                             |
| 250-1                                 | 1.465                           | 1.487                                              | 0.454                           | 0.307                            | 0.476                                       | 1.408                             | 1.262                                          | 1.184                                          | 2.198                                            | 1.806                              | 0.889                                                   | 0.746                                     | 1.146                                          | 0.719                                        | 1.365                                                   | 1.580                                              | 1.618                            | 1.268                                   | 0.826                                               | 0.508                           | 0.428                                       | 0.501                                                  | 0.473                                                  |
| 250-2                                 | 1.495                           | 1.547                                              | 0.484                           | 0.330                            | 0.511                                       | 1.408                             | 1.332                                          | 1.274                                          | 2.238                                            | 1.896                              | 0.923                                                   | 0.769                                     | 1.186                                          | 0.759                                        | 1.435                                                   | 1.650                                              | 1.688                            | 1.328                                   | 0.877                                               | 0.538                           | 0.456                                       | 0.521                                                  | 0.512                                                  |
| 250-3                                 | 1.405                           | 1.457                                              | 0.469                           | 0.326                            | 0.496                                       | 1.328                             | 1.292                                          | 1.194                                          | 2.108                                            | 1.856                              | 0.851                                                   | 0.720                                     | 1.116                                          | 0.680                                        | 1.305                                                   | 1.480                                              | 1.678                            | 1.218                                   | 0.816                                               | 0.519                           | 0.439                                       | 0.506                                                  | 0.513                                                  |
| 250-4                                 | 1.465                           | 1.467                                              | 0.488                           | 0.343                            | 0.510                                       | 1.378                             | 1.322                                          | 1.234                                          | 2.248                                            | 1.956                              | 0.887                                                   | 0.735                                     | 1.156                                          | 0.706                                        | 1.315                                                   | 1.520                                              | 1.728                            | 1.238                                   | 0.838                                               | 0.528                           | 0.449                                       | 0.523                                                  | 0.511                                                  |
| 250-5                                 | 1.435                           | 1.457                                              | 0.480                           | 0.351                            | 0.513                                       | 1.338                             | 1.352                                          | 1.234                                          | 2.398                                            | 1.946                              | 0.833                                                   | 0.726                                     | 1.136                                          | 0.723                                        | 1.335                                                   | 1.480                                              | 1.718                            | 1.228                                   | 0.826                                               | 0.538                           | 0.451                                       | 0.515                                                  | 0.530                                                  |
| 250-6                                 | 1.405                           | 1.477                                              | 0.495                           | 0.340                            | 0.517                                       | 1.348                             | 1.372                                          | 1.274                                          | 2.258                                            | 1.956                              | 0.860                                                   | 0.714                                     | 1.126                                          | 0.706                                        | 1.345                                                   | 1.530                                              | 1.758                            | 1.238                                   | 0.819                                               | 0.533                           | 0.450                                       | 0.533                                                  | 0.517                                                  |
| <b>Mean</b>                           | <b>1.445</b>                    | <b>1.482</b>                                       | <b>0.478</b>                    | <b>0.332</b>                     | <b>0.504</b>                                | <b>1.368</b>                      | <b>1.322</b>                                   | <b>1.233</b>                                   | <b>2.241</b>                                     | <b>1.902</b>                       | <b>0.874</b>                                            | <b>0.735</b>                              | <b>1.145</b>                                   | <b>0.715</b>                                 | <b>1.350</b>                                            | <b>1.540</b>                                       | <b>1.698</b>                     | <b>1.253</b>                            | <b>0.833</b>                                        | <b>0.527</b>                    | <b>0.446</b>                                | <b>0.517</b>                                           | <b>0.510</b>                                           |
| <b>SD</b>                             | <b>0.033</b>                    | <b>0.031</b>                                       | <b>0.013</b>                    | <b>0.014</b>                     | <b>0.014</b>                                | <b>0.032</b>                      | <b>0.037</b>                                   | <b>0.035</b>                                   | <b>0.086</b>                                     | <b>0.056</b>                       | <b>0.029</b>                                            | <b>0.018</b>                              | <b>0.023</b>                                   | <b>0.024</b>                                 | <b>0.043</b>                                            | <b>0.060</b>                                       | <b>0.044</b>                     | <b>0.037</b>                            | <b>0.021</b>                                        | <b>0.011</b>                    | <b>0.009</b>                                | <b>0.011</b>                                           | <b>0.017</b>                                           |
| <b>%RSD</b>                           | <b>2.3</b>                      | <b>2.1</b>                                         | <b>2.8</b>                      | <b>4.3</b>                       | <b>2.8</b>                                  | <b>2.3</b>                        | <b>2.8</b>                                     | <b>2.8</b>                                     | <b>3.8</b>                                       | <b>3.0</b>                         | <b>3.4</b>                                              | <b>2.5</b>                                | <b>2.0</b>                                     | <b>3.3</b>                                   | <b>3.2</b>                                              | <b>3.9</b>                                         | <b>2.6</b>                       | <b>2.9</b>                              | <b>2.5</b>                                          | <b>2.1</b>                      | <b>2.1</b>                                  | <b>2.1</b>                                             | <b>3.4</b>                                             |
| 500-1                                 | 2.875                           | 2.987                                              | 1.109                           | 0.726                            | 1.159                                       | 2.698                             | 3.052                                          | 2.714                                          | 5.088                                            | 4.296                              | 1.776                                                   | 1.490                                     | 2.186                                          | 1.430                                        | 2.695                                                   | 3.080                                              | 3.768                            | 2.488                                   | 1.657                                               | 1.160                           | 1.009                                       | 1.189                                                  | 1.168                                                  |
| 500-2                                 | 2.775                           | 2.857                                              | 1.089                           | 0.706                            | 1.139                                       | 2.648                             | 2.962                                          | 2.764                                          | 5.078                                            | 4.236                              | 1.706                                                   | 1.450                                     | 2.076                                          | 1.350                                        | 2.655                                                   | 3.050                                              | 3.738                            | 2.438                                   | 1.677                                               | 1.150                           | 1.029                                       | 1.199                                                  | 1.148                                                  |
| 500-3                                 | 2.875                           | 2.957                                              | 1.089                           | 0.725                            | 1.169                                       | 2.668                             | 2.952                                          | 2.764                                          | 5.198                                            | 4.236                              | 1.696                                                   | 1.400                                     | 2.196                                          | 1.390                                        | 2.705                                                   | 3.030                                              | 3.928                            | 2.448                                   | 1.647                                               | 1.150                           | 1.009                                       | 1.239                                                  | 1.198                                                  |
| 500-4                                 | 2.905                           | 2.947                                              | 1.069                           | 0.709                            | 1.159                                       | 2.598                             | 2.912                                          | 2.704                                          | 4.938                                            | 4.216                              | 1.666                                                   | 1.410                                     | 2.186                                          | 1.380                                        | 2.645                                                   | 2.940                                              | 3.908                            | 2.428                                   | 1.617                                               | 1.130                           | 0.982                                       | 1.199                                                  | 1.188                                                  |
| 500-5                                 | 3.035                           | 3.087                                              | 1.099                           | 0.750                            | 1.219                                       | 2.758                             | 3.062                                          | 2.844                                          | 5.098                                            | 4.266                              | 1.726                                                   | 1.490                                     | 2.326                                          | 1.480                                        | 2.725                                                   | 3.110                                              | 3.818                            | 2.558                                   | 1.707                                               | 1.180                           | 1.019                                       | 1.259                                                  | 1.198                                                  |
| 500-6                                 | 2.985                           | 3.137                                              | 1.169                           | 0.763                            | 1.219                                       | 2.798                             | 3.132                                          | 2.814                                          | 5.098                                            | 4.206                              | 1.766                                                   | 1.520                                     | 2.236                                          | 1.510                                        | 2.825                                                   | 3.270                                              | 3.758                            | 2.608                                   | 1.767                                               | 1.200                           | 1.039                                       | 1.229                                                  | 1.208                                                  |
| <b>Mean</b>                           | <b>2.908</b>                    | <b>2.995</b>                                       | <b>1.104</b>                    | <b>0.729</b>                     | <b>1.177</b>                                | <b>2.695</b>                      | <b>3.012</b>                                   | <b>2.768</b>                                   | <b>5.083</b>                                     | <b>4.242</b>                       | <b>1.723</b>                                            | <b>1.460</b>                              | <b>2.201</b>                                   | <b>1.423</b>                                 | <b>2.708</b>                                            | <b>3.080</b>                                       | <b>3.820</b>                     | <b>2.495</b>                            | <b>1.678</b>                                        | <b>1.161</b>                    | <b>1.015</b>                                | <b>1.219</b>                                           | <b>1.185</b>                                           |
| <b>SD</b>                             | <b>0.084</b>                    | <b>0.093</b>                                       | <b>0.031</b>                    | <b>0.021</b>                     | <b>0.031</b>                                | <b>0.067</b>                      | <b>0.076</b>                                   | <b>0.050</b>                                   | <b>0.076</b>                                     | <b>0.030</b>                       | <b>0.039</b>                                            | <b>0.044</b>                              | <b>0.074</b>                                   | <b>0.056</b>                                 | <b>0.059</b>                                            | <b>0.100</b>                                       | <b>0.074</b>                     | <b>0.067</b>                            | <b>0.048</b>                                        | <b>0.023</b>                    | <b>0.018</b>                                | <b>0.025</b>                                           | <b>0.021</b>                                           |
| <b>%RSD</b>                           | <b>2.9</b>                      | <b>3.1</b>                                         | <b>2.9</b>                      | <b>2.8</b>                       | <b>2.6</b>                                  | <b>2.5</b>                        | <b>2.5</b>                                     | <b>1.8</b>                                     | <b>1.5</b>                                       | <b>0.72</b>                        | <b>2.2</b>                                              | <b>3.0</b>                                | <b>3.4</b>                                     | <b>4.0</b>                                   | <b>2.2</b>                                              | <b>3.2</b>                                         | <b>1.9</b>                       | <b>2.7</b>                              | <b>2.9</b>                                          | <b>2.0</b>                      | <b>1.8</b>                                  | <b>2.1</b>                                             | <b>1.7</b>                                             |

**Table S14d.** SIFT-MS repeatability data for Mix 1 in 50% DMI:50% water at three levels (50, 250, and 500).

| Level—Replicate<br>Number; Statistics | Acetone<br>(NO <sup>+</sup> 88) | Acetonitrile<br>(H <sub>3</sub> O <sup>+</sup> 42) | Benzene<br>(NO <sup>+</sup> 78) | Benzene<br>(NO <sup>+</sup> 108) | Benzene<br>(O <sub>2</sub> <sup>+</sup> 78) | 1-Butanol<br>(NO <sup>+</sup> 73) | Chloroform<br>(O <sub>2</sub> <sup>+</sup> 83) | Chloroform<br>(O <sub>2</sub> <sup>+</sup> 85) | Isooctane<br>(H <sub>3</sub> O <sup>+</sup> 113) | Isooctane<br>(NO <sup>+</sup> 113) | Isopropyl alcohol<br>(H <sub>3</sub> O <sup>+</sup> 43) | Isopropyl alcohol<br>(NO <sup>+</sup> 59) | Methanol<br>(H <sub>3</sub> O <sup>+</sup> 33) | Methyl ethyl ketone<br>(NO <sup>+</sup> 102) | Methyl ethyl ketone<br>(O <sub>2</sub> <sup>+</sup> 72) | Nitromethane<br>(H <sub>3</sub> O <sup>+</sup> 62) | Propanal<br>(NO <sup>+</sup> 57) | Tetrahydrofuran<br>(NO <sup>+</sup> 71) | Tetrahydrofuran<br>(O <sub>2</sub> <sup>+</sup> 71) | Toluene<br>(NO <sup>+</sup> 92) | Toluene<br>(O <sub>2</sub> <sup>+</sup> 92) | Trichloroethylene<br>(O <sub>2</sub> <sup>+</sup> 130) | Trichloroethylene<br>(O <sub>2</sub> <sup>+</sup> 132) |
|---------------------------------------|---------------------------------|----------------------------------------------------|---------------------------------|----------------------------------|---------------------------------------------|-----------------------------------|------------------------------------------------|------------------------------------------------|--------------------------------------------------|------------------------------------|---------------------------------------------------------|-------------------------------------------|------------------------------------------------|----------------------------------------------|---------------------------------------------------------|----------------------------------------------------|----------------------------------|-----------------------------------------|-----------------------------------------------------|---------------------------------|---------------------------------------------|--------------------------------------------------------|--------------------------------------------------------|
| 50–1                                  | 0.262                           | 0.238                                              | 0.009                           | 0.014                            | 0.009                                       | 0.120                             | 0.019                                          | 0.048                                          | 0.357                                            | 0.110                              | 0.127                                                   | 0.102                                     | 0.501                                          | 0.094                                        | 0.261                                                   | 0.206                                              | 0.063                            | 0.264                                   | 0.163                                               | 0.023                           | 0.019                                       | 0.006                                                  | 0.010                                                  |
| 50–2                                  | 0.252                           | 0.229                                              | 0.009                           | 0.016                            | 0.009                                       | 0.119                             | 0.017                                          | 0.044                                          | 0.354                                            | 0.101                              | 0.135                                                   | 0.099                                     | 0.478                                          | 0.087                                        | 0.274                                                   | 0.198                                              | 0.062                            | 0.252                                   | 0.162                                               | 0.022                           | 0.020                                       | 0.005                                                  | 0.007                                                  |
| 50–3                                  | 0.259                           | 0.229                                              | 0.008                           | 0.014                            | 0.009                                       | 0.115                             | 0.015                                          | 0.044                                          | 0.286                                            | 0.115                              | 0.124                                                   | 0.109                                     | 0.494                                          | 0.094                                        | 0.261                                                   | 0.193                                              | 0.062                            | 0.250                                   | 0.149                                               | 0.023                           | 0.017                                       | 0.007                                                  | 0.006                                                  |
| 50–4                                  | 0.264                           | 0.231                                              | 0.007                           | 0.015                            | 0.009                                       | 0.114                             | 0.019                                          | 0.045                                          | 0.374                                            | 0.110                              | 0.127                                                   | 0.109                                     | 0.498                                          | 0.093                                        | 0.275                                                   | 0.197                                              | 0.063                            | 0.258                                   | 0.158                                               | 0.021                           | 0.017                                       | 0.009                                                  | 0.006                                                  |
| 50–5                                  | 0.253                           | 0.229                                              | 0.008                           | 0.017                            | 0.008                                       | 0.117                             | 0.019                                          | 0.049                                          | 0.395                                            | 0.103                              | 0.129                                                   | 0.107                                     | 0.483                                          | 0.095                                        | 0.252                                                   | 0.198                                              | 0.063                            | 0.246                                   | 0.156                                               | 0.020                           | 0.017                                       | 0.007                                                  | 0.007                                                  |
| 50–6                                  | 0.256                           | 0.227                                              | 0.008                           | 0.014                            | 0.009                                       | 0.120                             | 0.016                                          | 0.051                                          | 0.339                                            | 0.112                              | 0.133                                                   | 0.105                                     | 0.473                                          | 0.091                                        | 0.280                                                   | 0.206                                              | 0.062                            | 0.250                                   | 0.151                                               | 0.023                           | 0.018                                       | 0.007                                                  | 0.009                                                  |
| <b>Mean</b>                           | <b>0.257</b>                    | <b>0.230</b>                                       | <b>0.008</b>                    | <b>0.015</b>                     | <b>0.009</b>                                | <b>0.117</b>                      | <b>0.018</b>                                   | <b>0.047</b>                                   | <b>0.350</b>                                     | <b>0.109</b>                       | <b>0.129</b>                                            | <b>0.105</b>                              | <b>0.488</b>                                   | <b>0.092</b>                                 | <b>0.267</b>                                            | <b>0.199</b>                                       | <b>0.062</b>                     | <b>0.253</b>                            | <b>0.156</b>                                        | <b>0.022</b>                    | <b>0.018</b>                                | <b>0.007</b>                                           | <b>0.007</b>                                           |
| <b>SD</b>                             | <b>0.0044</b>                   | <b>0.0035</b>                                      | <b>0.0007</b>                   | <b>0.0012</b>                    | <b>0.0004</b>                               | <b>0.0024</b>                     | <b>0.0015</b>                                  | <b>0.0025</b>                                  | <b>0.0339</b>                                    | <b>0.0049</b>                      | <b>0.0038</b>                                           | <b>0.0037</b>                             | <b>0.0104</b>                                  | <b>0.0027</b>                                | <b>0.0098</b>                                           | <b>0.0048</b>                                      | <b>0.0006</b>                    | <b>0.0060</b>                           | <b>0.0052</b>                                       | <b>0.0011</b>                   | <b>0.0010</b>                               | <b>0.0014</b>                                          | <b>0.0017</b>                                          |
| <b>%RSD</b>                           | <b>1.7</b>                      | <b>1.5</b>                                         | <b>8.4</b>                      | <b>7.8</b>                       | <b>4.7</b>                                  | <b>2.0</b>                        | <b>8.3</b>                                     | <b>5.3</b>                                     | <b>9.7</b>                                       | <b>4.5</b>                         | <b>2.9</b>                                              | <b>3.5</b>                                | <b>2.1</b>                                     | <b>2.9</b>                                   | <b>3.7</b>                                              | <b>2.4</b>                                         | <b>0.93</b>                      | <b>2.4</b>                              | <b>3.3</b>                                          | <b>4.8</b>                      | <b>5.5</b>                                  | <b>20.7</b>                                            | <b>23.6</b>                                            |
| 250–1                                 | 1.195                           | 1.146                                              | 0.075                           | 0.057                            | 0.080                                       | 0.536                             | 0.225                                          | 0.223                                          | 0.764                                            | 0.468                              | 0.605                                                   | 0.502                                     | 1.346                                          | 0.413                                        | 0.878                                                   | 0.980                                              | 0.401                            | 0.868                                   | 0.539                                               | 0.074                           | 0.063                                       | 0.071                                                  | 0.077                                                  |
| 250–2                                 | 1.195                           | 1.146                                              | 0.076                           | 0.054                            | 0.081                                       | 0.524                             | 0.225                                          | 0.237                                          | 0.621                                            | 0.465                              | 0.602                                                   | 0.502                                     | 1.376                                          | 0.411                                        | 0.860                                                   | 0.960                                              | 0.409                            | 0.853                                   | 0.555                                               | 0.079                           | 0.064                                       | 0.071                                                  | 0.069                                                  |
| 250–3                                 | 1.215                           | 1.126                                              | 0.077                           | 0.069                            | 0.080                                       | 0.525                             | 0.216                                          | 0.243                                          | 0.659                                            | 0.474                              | 0.593                                                   | 0.500                                     | 1.386                                          | 0.417                                        | 0.868                                                   | 0.948                                              | 0.417                            | 0.858                                   | 0.543                                               | 0.079                           | 0.065                                       | 0.069                                                  | 0.069                                                  |
| 250–4                                 | 1.215                           | 1.156                                              | 0.080                           | 0.057                            | 0.078                                       | 0.540                             | 0.222                                          | 0.222                                          | 0.746                                            | 0.480                              | 0.613                                                   | 0.511                                     | 1.406                                          | 0.417                                        | 0.850                                                   | 0.975                                              | 0.405                            | 0.853                                   | 0.539                                               | 0.078                           | 0.063                                       | 0.078                                                  | 0.065                                                  |
| 250–5                                 | 1.165                           | 1.126                                              | 0.076                           | 0.055                            | 0.077                                       | 0.524                             | 0.207                                          | 0.216                                          | 0.716                                            | 0.443                              | 0.591                                                   | 0.505                                     | 1.396                                          | 0.409                                        | 0.833                                                   | 0.937                                              | 0.389                            | 0.840                                   | 0.523                                               | 0.072                           | 0.066                                       | 0.066                                                  | 0.069                                                  |
| 250–6                                 | 1.145                           | 1.106                                              | 0.077                           | 0.051                            | 0.077                                       | 0.495                             | 0.225                                          | 0.229                                          | 0.752                                            | 0.460                              | 0.603                                                   | 0.485                                     | 1.316                                          | 0.397                                        | 0.825                                                   | 0.924                                              | 0.396                            | 0.814                                   | 0.526                                               | 0.076                           | 0.059                                       | 0.073                                                  | 0.065                                                  |
| <b>Mean</b>                           | <b>1.188</b>                    | <b>1.134</b>                                       | <b>0.077</b>                    | <b>0.057</b>                     | <b>0.079</b>                                | <b>0.524</b>                      | <b>0.220</b>                                   | <b>0.228</b>                                   | <b>0.709</b>                                     | <b>0.465</b>                       | <b>0.601</b>                                            | <b>0.501</b>                              | <b>1.371</b>                                   | <b>0.410</b>                                 | <b>0.852</b>                                            | <b>0.954</b>                                       | <b>0.403</b>                     | <b>0.848</b>                            | <b>0.537</b>                                        | <b>0.076</b>                    | <b>0.063</b>                                | <b>0.071</b>                                           | <b>0.069</b>                                           |
| <b>SD</b>                             | <b>0.026</b>                    | <b>0.017</b>                                       | <b>0.002</b>                    | <b>0.006</b>                     | <b>0.002</b>                                | <b>0.014</b>                      | <b>0.007</b>                                   | <b>0.009</b>                                   | <b>0.052</b>                                     | <b>0.012</b>                       | <b>0.007</b>                                            | <b>0.008</b>                              | <b>0.031</b>                                   | <b>0.007</b>                                 | <b>0.019</b>                                            | <b>0.020</b>                                       | <b>0.009</b>                     | <b>0.017</b>                            | <b>0.011</b>                                        | <b>0.003</b>                    | <b>0.002</b>                                | <b>0.003</b>                                           | <b>0.004</b>                                           |
| <b>%RSD</b>                           | <b>2.2</b>                      | <b>1.5</b>                                         | <b>2.0</b>                      | <b>9.9</b>                       | <b>2.0</b>                                  | <b>2.7</b>                        | <b>3.0</b>                                     | <b>4.1</b>                                     | <b>7.4</b>                                       | <b>2.5</b>                         | <b>1.2</b>                                              | <b>1.6</b>                                | <b>2.3</b>                                     | <b>1.7</b>                                   | <b>2.2</b>                                              | <b>2.1</b>                                         | <b>2.2</b>                       | <b>2.0</b>                              | <b>2.0</b>                                          | <b>3.6</b>                      | <b>3.4</b>                                  | <b>4.8</b>                                             | <b>6.0</b>                                             |
| 500–1                                 | 2.205                           | 2.176                                              | 0.160                           | 0.108                            | 0.164                                       | 1.047                             | 0.446                                          | 0.447                                          | 1.190                                            | 0.846                              | 1.185                                                   | 0.974                                     | 2.326                                          | 0.772                                        | 1.583                                                   | 1.890                                              | 0.787                            | 1.547                                   | 1.017                                               | 0.142                           | 0.109                                       | 0.150                                                  | 0.144                                                  |
| 500–2                                 | 2.245                           | 2.266                                              | 0.163                           | 0.107                            | 0.170                                       | 1.047                             | 0.448                                          | 0.462                                          | 1.170                                            | 0.855                              | 1.165                                                   | 0.954                                     | 2.326                                          | 0.796                                        | 1.613                                                   | 1.950                                              | 0.781                            | 1.577                                   | 0.997                                               | 0.145                           | 0.113                                       | 0.156                                                  | 0.145                                                  |
| 500–3                                 | 2.285                           | 2.246                                              | 0.164                           | 0.114                            | 0.170                                       | 1.057                             | 0.475                                          | 0.441                                          | 1.240                                            | 0.852                              | 1.175                                                   | 0.950                                     | 2.426                                          | 0.819                                        | 1.563                                                   | 1.890                                              | 0.776                            | 1.587                                   | 0.997                                               | 0.153                           | 0.120                                       | 0.160                                                  | 0.142                                                  |
| 500–4                                 | 2.355                           | 2.336                                              | 0.163                           | 0.116                            | 0.175                                       | 1.097                             | 0.468                                          | 0.471                                          | 1.130                                            | 0.793                              | 1.225                                                   | 1.028                                     | 2.506                                          | 0.824                                        | 1.573                                                   | 1.950                                              | 0.732                            | 1.617                                   | 1.047                                               | 0.149                           | 0.119                                       | 0.152                                                  | 0.144                                                  |
| 500–5                                 | 2.285                           | 2.246                                              | 0.158                           | 0.106                            | 0.176                                       | 1.047                             | 0.473                                          | 0.480                                          | 1.240                                            | 0.819                              | 1.155                                                   | 0.986                                     | 2.366                                          | 0.801                                        | 1.623                                                   | 1.920                                              | 0.775                            | 1.617                                   | 1.017                                               | 0.148                           | 0.120                                       | 0.160                                                  | 0.148                                                  |
| 500–6                                 | 2.155                           | 2.156                                              | 0.163                           | 0.102                            | 0.159                                       | 1.027                             | 0.463                                          | 0.442                                          | 1.140                                            | 0.775                              | 1.175                                                   | 0.958                                     | 2.296                                          | 0.769                                        | 1.543                                                   | 1.870                                              | 0.733                            | 1.517                                   | 0.972                                               | 0.143                           | 0.115                                       | 0.148                                                  | 0.141                                                  |
| <b>Mean</b>                           | <b>2.255</b>                    | <b>2.237</b>                                       | <b>0.162</b>                    | <b>0.109</b>                     | <b>0.169</b>                                | <b>1.053</b>                      | <b>0.462</b>                                   | <b>0.457</b>                                   | <b>1.185</b>                                     | <b>0.823</b>                       | <b>1.180</b>                                            | <b>0.975</b>                              | <b>2.375</b>                                   | <b>0.797</b>                                 | <b>1.583</b>                                            | <b>1.911</b>                                       | <b>0.764</b>                     | <b>1.577</b>                            | <b>1.007</b>                                        | <b>0.147</b>                    | <b>0.116</b>                                | <b>0.154</b>                                           | <b>0.144</b>                                           |
| <b>SD</b>                             | <b>0.064</b>                    | <b>0.059</b>                                       | <b>0.002</b>                    | <b>0.005</b>                     | <b>0.006</b>                                | <b>0.021</b>                      | <b>0.011</b>                                   | <b>0.015</b>                                   | <b>0.043</b>                                     | <b>0.031</b>                       | <b>0.022</b>                                            | <b>0.027</b>                              | <b>0.072</b>                                   | <b>0.021</b>                                 | <b>0.028</b>                                            | <b>0.031</b>                                       | <b>0.023</b>                     | <b>0.036</b>                            | <b>0.023</b>                                        | <b>0.004</b>                    | <b>0.004</b>                                | <b>0.005</b>                                           | <b>0.002</b>                                           |
| <b>%RSD</b>                           | <b>2.8</b>                      | <b>2.6</b>                                         | <b>1.3</b>                      | <b>4.4</b>                       | <b>3.5</b>                                  | <b>2.0</b>                        | <b>2.5</b>                                     | <b>3.3</b>                                     | <b>3.7</b>                                       | <b>3.7</b>                         | <b>1.9</b>                                              | <b>2.7</b>                                | <b>3.0</b>                                     | <b>2.6</b>                                   | <b>1.7</b>                                              | <b>1.6</b>                                         | <b>3.0</b>                       | <b>2.3</b>                              | <b>2.3</b>                                          | <b>2.6</b>                      | <b>3.5</b>                                  | <b>3.0</b>                                             | <b>1.6</b>                                             |

**Table S14e.** SIFT-MS repeatability data for Mix 1 in 75% DMI:25% water at three levels (50, 250, and 500).

| Level—Replicate<br>Number; Statistics | Acetone<br>(NO <sup>+</sup> 88) | Acetonitrile<br>(H <sub>3</sub> O <sup>+</sup> 42) | Benzene<br>(NO <sup>+</sup> 78) | Benzene<br>(NO <sup>+</sup> 108) | Benzene<br>(O <sub>2</sub> <sup>+</sup> 78) | 1-Butanol<br>(NO <sup>+</sup> 73) | Chloroform<br>(O <sub>2</sub> <sup>+</sup> 83) | Chloroform<br>(O <sub>2</sub> <sup>+</sup> 85) | Isooctane<br>(H <sub>3</sub> O <sup>+</sup> 113) | Isooctane<br>(NO <sup>+</sup> 113) | Isopropyl alcohol<br>(H <sub>3</sub> O <sup>+</sup> 43) | Isopropyl alcohol<br>(NO <sup>+</sup> 59) | Methanol<br>(H <sub>3</sub> O <sup>+</sup> 33) | Methyl ethyl ketone<br>(NO <sup>+</sup> 102) | Methyl ethyl ketone<br>(O <sub>2</sub> <sup>+</sup> 72) | Nitromethane<br>(H <sub>3</sub> O <sup>+</sup> 62) | Propanal<br>(NO <sup>+</sup> 57) | Tetrahydrofuran<br>(NO <sup>+</sup> 71) | Tetrahydrofuran<br>(O <sub>2</sub> <sup>+</sup> 71) | Toluene<br>(NO <sup>+</sup> 92) | Toluene<br>(O <sub>2</sub> <sup>+</sup> 92) | Trichloroethylene<br>(O <sub>2</sub> <sup>+</sup> 130) | Trichloroethylene<br>(O <sub>2</sub> <sup>+</sup> 132) |
|---------------------------------------|---------------------------------|----------------------------------------------------|---------------------------------|----------------------------------|---------------------------------------------|-----------------------------------|------------------------------------------------|------------------------------------------------|--------------------------------------------------|------------------------------------|---------------------------------------------------------|-------------------------------------------|------------------------------------------------|----------------------------------------------|---------------------------------------------------------|----------------------------------------------------|----------------------------------|-----------------------------------------|-----------------------------------------------------|---------------------------------|---------------------------------------------|--------------------------------------------------------|--------------------------------------------------------|
| 50–1                                  | 0.277                           | 0.192                                              | 0.003                           | 0.006                            | 0.003                                       | 0.062                             | -0.004                                         | 0.012                                          | 0.340                                            | 0.130                              | 0.116                                                   | 0.115                                     | 0.707                                          | 0.076                                        | 0.215                                                   | 0.108                                              | 0.044                            | 0.227                                   | 0.132                                               | 0.007                           | 0.006                                       | 0.001                                                  | 0.003                                                  |
| 50–2                                  | 0.270                           | 0.192                                              | 0.002                           | 0.007                            | 0.003                                       | 0.060                             | -0.007                                         | 0.011                                          | 0.339                                            | 0.119                              | 0.113                                                   | 0.115                                     | 0.696                                          | 0.078                                        | 0.216                                                   | 0.109                                              | 0.042                            | 0.215                                   | 0.136                                               | 0.008                           | 0.005                                       | 0.002                                                  | 0.002                                                  |
| 50–3                                  | 0.268                           | 0.190                                              | 0.001                           | 0.004                            | 0.003                                       | 0.066                             | -0.006                                         | 0.012                                          | 0.242                                            | 0.150                              | 0.108                                                   | 0.120                                     | 0.682                                          | 0.076                                        | 0.212                                                   | 0.104                                              | 0.044                            | 0.222                                   | 0.131                                               | 0.009                           | 0.005                                       | 0.002                                                  | 0.003                                                  |
| 50–4                                  | 0.266                           | 0.195                                              | 0.002                           | 0.005                            | 0.002                                       | 0.061                             | -0.009                                         | 0.014                                          | 0.290                                            | 0.122                              | 0.110                                                   | 0.113                                     | 0.672                                          | 0.071                                        | 0.234                                                   | 0.111                                              | 0.042                            | 0.222                                   | 0.134                                               | 0.007                           | 0.005                                       | 0.002                                                  | 0.002                                                  |
| 50–5                                  | 0.259                           | 0.190                                              | 0.003                           | 0.005                            | 0.002                                       | 0.066                             | -0.004                                         | 0.007                                          | 0.206                                            | 0.128                              | 0.112                                                   | 0.111                                     | 0.660                                          | 0.075                                        | 0.226                                                   | 0.107                                              | 0.044                            | 0.208                                   | 0.127                                               | 0.007                           | 0.004                                       | 0.003                                                  | 0.003                                                  |
| 50–6                                  | 0.267                           | 0.195                                              | 0.002                           | 0.005                            | 0.003                                       | 0.062                             | -0.007                                         | 0.010                                          | 0.252                                            | 0.115                              | 0.107                                                   | 0.106                                     | 0.652                                          | 0.071                                        | 0.225                                                   | 0.112                                              | 0.041                            | 0.221                                   | 0.132                                               | 0.008                           | 0.004                                       | 0.002                                                  | 0.003                                                  |
| <b>Mean</b>                           | <b>0.268</b>                    | <b>0.192</b>                                       | <b>0.002</b>                    | <b>0.005</b>                     | <b>0.003</b>                                | <b>0.063</b>                      | <b>-0.006</b>                                  | <b>0.011</b>                                   | <b>0.278</b>                                     | <b>0.128</b>                       | <b>0.111</b>                                            | <b>0.113</b>                              | <b>0.678</b>                                   | <b>0.074</b>                                 | <b>0.221</b>                                            | <b>0.108</b>                                       | <b>0.043</b>                     | <b>0.220</b>                            | <b>0.132</b>                                        | <b>0.008</b>                    | <b>0.005</b>                                | <b>0.002</b>                                           | <b>0.003</b>                                           |
| <b>SD</b>                             | <b>0.0053</b>                   | <b>0.0021</b>                                      | <b>0.0008</b>                   | <b>0.0008</b>                    | <b>0.0005</b>                               | <b>0.0024</b>                     | <b>0.0017</b>                                  | <b>0.0022</b>                                  | <b>0.0498</b>                                    | <b>0.0113</b>                      | <b>0.0031</b>                                           | <b>0.0043</b>                             | <b>0.0192</b>                                  | <b>0.0027</b>                                | <b>0.0077</b>                                           | <b>0.0026</b>                                      | <b>0.0012</b>                    | <b>0.0061</b>                           | <b>0.0028</b>                                       | <b>0.0009</b>                   | <b>0.0007</b>                               | <b>0.0006</b>                                          | <b>0.0004</b>                                          |
| <b>%RSD</b>                           | <b>2.0</b>                      | <b>1.1</b>                                         | <b>37.5</b>                     | <b>15.6</b>                      | <b>19.7</b>                                 | <b>3.8</b>                        | <b>-28.0</b>                                   | <b>19.7</b>                                    | <b>17.9</b>                                      | <b>8.9</b>                         | <b>2.7</b>                                              | <b>3.8</b>                                | <b>2.8</b>                                     | <b>3.6</b>                                   | <b>3.5</b>                                              | <b>2.4</b>                                         | <b>2.7</b>                       | <b>2.8</b>                              | <b>2.1</b>                                          | <b>12.0</b>                     | <b>13.6</b>                                 | <b>30.2</b>                                            | <b>15.9</b>                                            |
| 250–1                                 | 1.177                           | 0.934                                              | 0.021                           | 0.017                            | 0.020                                       | 0.302                             | 0.029                                          | 0.130                                          | 1.486                                            | 1.162                              | 0.501                                                   | 0.432                                     | 1.607                                          | 0.313                                        | 0.738                                                   | 0.555                                              | 0.181                            | 0.734                                   | 0.515                                               | 0.020                           | 0.015                                       | 0.018                                                  | 0.013                                                  |
| 250–2                                 | 1.227                           | 0.954                                              | 0.020                           | 0.018                            | 0.019                                       | 0.304                             | 0.036                                          | 0.058                                          | 0.450                                            | 0.286                              | 0.525                                                   | 0.465                                     | 1.707                                          | 0.315                                        | 0.688                                                   | 0.533                                              | 0.182                            | 0.729                                   | 0.471                                               | 0.019                           | 0.016                                       | 0.016                                                  | 0.013                                                  |
| 250–3                                 | 1.177                           | 0.927                                              | 0.021                           | 0.018                            | 0.021                                       | 0.298                             | 0.030                                          | 0.055                                          | 0.562                                            | 0.287                              | 0.509                                                   | 0.442                                     | 1.657                                          | 0.307                                        | 0.683                                                   | 0.543                                              | 0.194                            | 0.739                                   | 0.449                                               | 0.021                           | 0.014                                       | 0.016                                                  | 0.019                                                  |
| 250–4                                 | 1.177                           | 0.929                                              | 0.020                           | 0.016                            | 0.018                                       | 0.295                             | 0.035                                          | 0.057                                          | 0.576                                            | 0.305                              | 0.520                                                   | 0.459                                     | 1.687                                          | 0.310                                        | 0.698                                                   | 0.553                                              | 0.184                            | 0.728                                   | 0.476                                               | 0.020                           | 0.014                                       | 0.016                                                  | 0.013                                                  |
| 250–5                                 | 1.147                           | 0.906                                              | 0.020                           | 0.015                            | 0.021                                       | 0.296                             | 0.031                                          | 0.045                                          | 0.476                                            | 0.258                              | 0.516                                                   | 0.455                                     | 1.657                                          | 0.300                                        | 0.671                                                   | 0.540                                              | 0.168                            | 0.695                                   | 0.444                                               | 0.019                           | 0.015                                       | 0.015                                                  | 0.014                                                  |
| 250–6                                 | 1.217                           | 0.937                                              | 0.021                           | 0.013                            | 0.019                                       | 0.298                             | 0.030                                          | 0.049                                          | 0.395                                            | 0.271                              | 0.510                                                   | 0.457                                     | 1.677                                          | 0.308                                        | 0.691                                                   | 0.555                                              | 0.187                            | 0.727                                   | 0.465                                               | 0.023                           | 0.014                                       | 0.015                                                  | 0.018                                                  |
| <b>Mean</b>                           | <b>1.187</b>                    | <b>0.931</b>                                       | <b>0.020</b>                    | <b>0.016</b>                     | <b>0.020</b>                                | <b>0.299</b>                      | <b>0.032</b>                                   | <b>0.066</b>                                   | <b>0.657</b>                                     | <b>0.428</b>                       | <b>0.514</b>                                            | <b>0.451</b>                              | <b>1.665</b>                                   | <b>0.309</b>                                 | <b>0.695</b>                                            | <b>0.546</b>                                       | <b>0.183</b>                     | <b>0.726</b>                            | <b>0.470</b>                                        | <b>0.020</b>                    | <b>0.015</b>                                | <b>0.016</b>                                           | <b>0.015</b>                                           |
| <b>SD</b>                             | <b>0.027</b>                    | <b>0.014</b>                                       | <b>0.001</b>                    | <b>0.002</b>                     | <b>0.001</b>                                | <b>0.003</b>                      | <b>0.003</b>                                   | <b>0.029</b>                                   | <b>0.376</b>                                     | <b>0.329</b>                       | <b>0.008</b>                                            | <b>0.011</b>                              | <b>0.031</b>                                   | <b>0.005</b>                                 | <b>0.021</b>                                            | <b>0.008</b>                                       | <b>0.008</b>                     | <b>0.014</b>                            | <b>0.023</b>                                        | <b>0.001</b>                    | <b>0.001</b>                                | <b>0.001</b>                                           | <b>0.002</b>                                           |
| <b>%RSD</b>                           | <b>2.3</b>                      | <b>1.5</b>                                         | <b>2.7</b>                      | <b>10.7</b>                      | <b>5.8</b>                                  | <b>1.1</b>                        | <b>8.3</b>                                     | <b>44.5</b>                                    | <b>57.2</b>                                      | <b>76.7</b>                        | <b>1.5</b>                                              | <b>2.5</b>                                | <b>1.9</b>                                     | <b>1.6</b>                                   | <b>3.0</b>                                              | <b>1.5</b>                                         | <b>4.3</b>                       | <b>2.0</b>                              | <b>4.9</b>                                          | <b>6.8</b>                      | <b>3.9</b>                                  | <b>5.5</b>                                             | <b>16.3</b>                                            |
| 500–1                                 | 2.217                           | 1.805                                              | 0.043                           | 0.034                            | 0.044                                       | 0.594                             | 0.097                                          | 0.107                                          | 0.637                                            | 0.420                              | 0.984                                                   | 0.861                                     | 2.827                                          | 0.607                                        | 1.273                                                   | 1.099                                              | 0.367                            | 1.327                                   | 0.841                                               | 0.038                           | 0.028                                       | 0.036                                                  | 0.032                                                  |
| 500–2                                 | 2.327                           | 1.875                                              | 0.044                           | 0.030                            | 0.050                                       | 0.595                             | 0.098                                          | 0.111                                          | 0.641                                            | 0.456                              | 1.006                                                   | 0.868                                     | 2.917                                          | 0.615                                        | 1.273                                                   | 1.099                                              | 0.381                            | 1.347                                   | 0.872                                               | 0.040                           | 0.028                                       | 0.040                                                  | 0.035                                                  |
| 500–3                                 | 2.297                           | 1.835                                              | 0.050                           | 0.035                            | 0.046                                       | 0.609                             | 0.099                                          | 0.102                                          | 0.585                                            | 0.430                              | 1.006                                                   | 0.864                                     | 2.867                                          | 0.600                                        | 1.293                                                   | 1.089                                              | 0.376                            | 1.367                                   | 0.854                                               | 0.039                           | 0.029                                       | 0.033                                                  | 0.035                                                  |
| 500–4                                 | 2.317                           | 1.865                                              | 0.044                           | 0.031                            | 0.044                                       | 0.589                             | 0.094                                          | 0.108                                          | 0.618                                            | 0.451                              | 0.996                                                   | 0.824                                     | 2.817                                          | 0.612                                        | 1.293                                                   | 1.119                                              | 0.385                            | 1.357                                   | 0.868                                               | 0.041                           | 0.028                                       | 0.036                                                  | 0.035                                                  |
| 500–5                                 | 2.277                           | 1.845                                              | 0.047                           | 0.031                            | 0.049                                       | 0.598                             | 0.090                                          | 0.116                                          | 0.699                                            | 0.459                              | 1.006                                                   | 0.864                                     | 2.757                                          | 0.608                                        | 1.303                                                   | 1.099                                              | 0.377                            | 1.367                                   | 0.877                                               | 0.037                           | 0.030                                       | 0.039                                                  | 0.032                                                  |
| 500–6                                 | 2.257                           | 1.815                                              | 0.046                           | 0.029                            | 0.048                                       | 0.617                             | 0.093                                          | 0.116                                          | 0.722                                            | 0.469                              | 1.026                                                   | 0.863                                     | 2.737                                          | 0.610                                        | 1.293                                                   | 1.139                                              | 0.383                            | 1.347                                   | 0.894                                               | 0.041                           | 0.028                                       | 0.034                                                  | 0.034                                                  |
| <b>Mean</b>                           | <b>2.282</b>                    | <b>1.840</b>                                       | <b>0.046</b>                    | <b>0.032</b>                     | <b>0.047</b>                                | <b>0.600</b>                      | <b>0.095</b>                                   | <b>0.110</b>                                   | <b>0.650</b>                                     | <b>0.448</b>                       | <b>1.004</b>                                            | <b>0.857</b>                              | <b>2.820</b>                                   | <b>0.609</b>                                 | <b>1.288</b>                                            | <b>1.107</b>                                       | <b>0.378</b>                     | <b>1.352</b>                            | <b>0.868</b>                                        | <b>0.039</b>                    | <b>0.028</b>                                | <b>0.036</b>                                           | <b>0.034</b>                                           |
| <b>SD</b>                             | <b>0.037</b>                    | <b>0.025</b>                                       | <b>0.002</b>                    | <b>0.002</b>                     | <b>0.002</b>                                | <b>0.010</b>                      | <b>0.003</b>                                   | <b>0.005</b>                                   | <b>0.047</b>                                     | <b>0.017</b>                       | <b>0.013</b>                                            | <b>0.015</b>                              | <b>0.061</b>                                   | <b>0.005</b>                                 | <b>0.011</b>                                            | <b>0.017</b>                                       | <b>0.006</b>                     | <b>0.014</b>                            | <b>0.017</b>                                        | <b>0.001</b>                    | <b>0.001</b>                                | <b>0.003</b>                                           | <b>0.001</b>                                           |
| <b>%RSD</b>                           | <b>1.6</b>                      | <b>1.4</b>                                         | <b>5.1</b>                      | <b>6.2</b>                       | <b>5.3</b>                                  | <b>1.6</b>                        | <b>3.3</b>                                     | <b>4.5</b>                                     | <b>7.2</b>                                       | <b>3.8</b>                         | <b>1.3</b>                                              | <b>1.8</b>                                | <b>2.2</b>                                     | <b>0.8</b>                                   | <b>0.9</b>                                              | <b>1.5</b>                                         | <b>1.6</b>                       | <b>1.0</b>                              | <b>1.9</b>                                          | <b>3.8</b>                      | <b>2.4</b>                                  | <b>7.2</b>                                             | <b>4.4</b>                                             |

**Table S14f.** SIFT-MS repeatability data for Mix 1 in 100% DMI at three levels (50, 250, and 500).

| Level—Replicate<br>Number; Statistics | Acetone<br>(NO <sup>+</sup> 88) | Acetonitrile<br>(H <sub>3</sub> O <sup>+</sup> 42) | Benzene<br>(NO <sup>+</sup> 78) | Benzene<br>(NO <sup>+</sup> 108) | Benzene<br>(O <sub>2</sub> <sup>+</sup> 78) | 1-Butanol<br>(NO <sup>+</sup> 73) | Chloroform<br>(O <sub>2</sub> <sup>+</sup> 83) | Chloroform<br>(O <sub>2</sub> <sup>+</sup> 85) | Isooctane<br>(H <sub>3</sub> O <sup>+</sup> 113) | Isooctane<br>(NO <sup>+</sup> 113) | Isopropyl alcohol<br>(H <sub>3</sub> O <sup>+</sup> 43) | Isopropyl alcohol<br>(NO <sup>+</sup> 59) | Methanol<br>(H <sub>3</sub> O <sup>+</sup> 33) | Methyl ethyl ketone<br>(NO <sup>+</sup> 102) | Methyl ethyl ketone<br>(O <sub>2</sub> <sup>+</sup> 72) | Nitromethane<br>(H <sub>3</sub> O <sup>+</sup> 62) | Propanal<br>(NO <sup>+</sup> 57) | Tetrahydrofuran<br>(NO <sup>+</sup> 71) | Tetrahydrofuran<br>(O <sub>2</sub> <sup>+</sup> 71) | Toluene<br>(NO <sup>+</sup> 92) | Toluene<br>(O <sub>2</sub> <sup>+</sup> 92) | Trichloroethylene<br>(O <sub>2</sub> <sup>+</sup> 130) | Trichloroethylene<br>(O <sub>2</sub> <sup>+</sup> 132) |
|---------------------------------------|---------------------------------|----------------------------------------------------|---------------------------------|----------------------------------|---------------------------------------------|-----------------------------------|------------------------------------------------|------------------------------------------------|--------------------------------------------------|------------------------------------|---------------------------------------------------------|-------------------------------------------|------------------------------------------------|----------------------------------------------|---------------------------------------------------------|----------------------------------------------------|----------------------------------|-----------------------------------------|-----------------------------------------------------|---------------------------------|---------------------------------------------|--------------------------------------------------------|--------------------------------------------------------|
| 50–1                                  | 0.190                           | 0.159                                              | 0.002                           | 0.001                            | 0.000                                       | 0.029                             | -0.008                                         | 0.170                                          | 2.463                                            | 1.069                              | 0.099                                                   | 0.112                                     | 0.846                                          | 0.038                                        | 0.237                                                   | 0.053                                              | 0.033                            | 0.125                                   | 0.165                                               | 0.001                           | 0.001                                       | 0.001                                                  | 0.002                                                  |
| 50–2                                  | 0.207                           | 0.167                                              | 0.002                           | 0.001                            | 0.000                                       | 0.029                             | -0.002                                         | 0.190                                          | 2.503                                            | 1.189                              | 0.093                                                   | 0.112                                     | 0.859                                          | 0.037                                        | 0.248                                                   | 0.051                                              | 0.034                            | 0.125                                   | 0.164                                               | 0.001                           | 0.001                                       | 0.000                                                  | -0.001                                                 |
| 50–3                                  | 0.193                           | 0.169                                              | 0.000                           | 0.001                            | 0.001                                       | 0.031                             | -0.004                                         | 0.182                                          | 2.683                                            | 1.159                              | 0.104                                                   | 0.118                                     | 0.858                                          | 0.039                                        | 0.270                                                   | 0.057                                              | 0.035                            | 0.124                                   | 0.167                                               | 0.001                           | 0.001                                       | 0.001                                                  | 0.000                                                  |
| 50–4                                  | 0.196                           | 0.168                                              | 0.001                           | 0.004                            | 0.000                                       | 0.029                             | -0.005                                         | 0.180                                          | 2.473                                            | 1.139                              | 0.101                                                   | 0.111                                     | 0.846                                          | 0.038                                        | 0.260                                                   | 0.057                                              | 0.037                            | 0.118                                   | 0.161                                               | 0.001                           | 0.000                                       | 0.001                                                  | -0.001                                                 |
| 50–5                                  | 0.210                           | 0.158                                              | 0.000                           | 0.001                            | 0.000                                       | 0.031                             | -0.003                                         | 0.181                                          | 2.503                                            | 1.169                              | 0.102                                                   | 0.114                                     | 0.856                                          | 0.037                                        | 0.258                                                   | 0.054                                              | 0.035                            | 0.119                                   | 0.169                                               | 0.002                           | 0.000                                       | 0.001                                                  | 0.001                                                  |
| 50–6                                  | 0.190                           | 0.168                                              | 0.001                           | 0.000                            | 0.000                                       | 0.031                             | -0.004                                         | 0.189                                          | 2.493                                            | 1.289                              | 0.096                                                   | 0.111                                     | 0.863                                          | 0.034                                        | 0.271                                                   | 0.060                                              | 0.036                            | 0.124                                   | 0.179                                               | 0.001                           | 0.001                                       | 0.001                                                  | 0.000                                                  |
| <b>Mean</b>                           | <b>0.198</b>                    | <b>0.165</b>                                       | <b>0.001</b>                    | <b>0.001</b>                     | <b>0.000</b>                                | <b>0.030</b>                      | <b>-0.004</b>                                  | <b>0.182</b>                                   | <b>2.520</b>                                     | <b>1.169</b>                       | <b>0.099</b>                                            | <b>0.113</b>                              | <b>0.855</b>                                   | <b>0.037</b>                                 | <b>0.258</b>                                            | <b>0.055</b>                                       | <b>0.035</b>                     | <b>0.122</b>                            | <b>0.167</b>                                        | <b>0.001</b>                    | <b>0.001</b>                                | <b>0.001</b>                                           | <b>0.000</b>                                           |
| <b>SD</b>                             | <b>0.0080</b>                   | <b>0.0045</b>                                      | <b>0.0006</b>                   | <b>0.0012</b>                    | <b>0.0003</b>                               | <b>0.0010</b>                     | <b>0.0018</b>                                  | <b>0.0066</b>                                  | <b>0.0745</b>                                    | <b>0.0656</b>                      | <b>0.0037</b>                                           | <b>0.0024</b>                             | <b>0.0065</b>                                  | <b>0.0015</b>                                | <b>0.0119</b>                                           | <b>0.0030</b>                                      | <b>0.0013</b>                    | <b>0.0029</b>                           | <b>0.0057</b>                                       | <b>0.0003</b>                   | <b>0.0004</b>                               | <b>0.0003</b>                                          | <b>0.0010</b>                                          |
| <b>%RSD</b>                           | <b>4.0</b>                      | <b>2.7</b>                                         | <b>55.0</b>                     | <b>101.6</b>                     | <b>196.8</b>                                | <b>3.5</b>                        | <b>-43.3</b>                                   | <b>3.6</b>                                     | <b>3.0</b>                                       | <b>5.6</b>                         | <b>3.7</b>                                              | <b>2.2</b>                                | <b>0.76</b>                                    | <b>4.1</b>                                   | <b>4.6</b>                                              | <b>5.3</b>                                         | <b>3.6</b>                       | <b>2.4</b>                              | <b>3.4</b>                                          | <b>29.2</b>                     | <b>61.1</b>                                 | <b>30.2</b>                                            | <b>868.1</b>                                           |
| 250–1                                 | 0.939                           | 0.694                                              | 0.004                           | 0.006                            | 0.004                                       | 0.134                             | 0.002                                          | 0.096                                          | 1.263                                            | 0.782                              | 0.373                                                   | 0.326                                     | 1.905                                          | 0.167                                        | 0.483                                                   | 0.274                                              | 0.051                            | 0.441                                   | 0.355                                               | 0.003                           | 0.002                                       | 0.004                                                  | 0.002                                                  |
| 250–2                                 | 0.871                           | 0.679                                              | 0.004                           | 0.005                            | 0.003                                       | 0.126                             | -0.002                                         | 0.086                                          | 1.273                                            | 0.700                              | 0.375                                                   | 0.321                                     | 1.885                                          | 0.168                                        | 0.469                                                   | 0.261                                              | 0.047                            | 0.451                                   | 0.343                                               | 0.003                           | 0.001                                       | 0.002                                                  | 0.002                                                  |
| 250–3                                 | 0.935                           | 0.685                                              | 0.004                           | 0.002                            | 0.003                                       | 0.131                             | -0.003                                         | 0.084                                          | 1.213                                            | 0.706                              | 0.382                                                   | 0.324                                     | 1.915                                          | 0.167                                        | 0.479                                                   | 0.262                                              | 0.049                            | 0.450                                   | 0.339                                               | 0.003                           | 0.002                                       | 0.002                                                  | 0.001                                                  |
| 250–4                                 | 0.931                           | 0.704                                              | 0.005                           | 0.004                            | 0.004                                       | 0.135                             | 0.000                                          | 0.084                                          | 1.293                                            | 0.736                              | 0.370                                                   | 0.322                                     | 1.905                                          | 0.161                                        | 0.473                                                   | 0.269                                              | 0.047                            | 0.444                                   | 0.330                                               | 0.003                           | 0.002                                       | 0.003                                                  | 0.001                                                  |
| 250–5                                 | 0.921                           | 0.703                                              | 0.005                           | 0.004                            | 0.004                                       | 0.136                             | -0.001                                         | 0.087                                          | 1.193                                            | 0.736                              | 0.374                                                   | 0.323                                     | 1.905                                          | 0.167                                        | 0.487                                                   | 0.261                                              | 0.051                            | 0.446                                   | 0.343                                               | 0.003                           | 0.002                                       | 0.003                                                  | 0.001                                                  |
| 250–6                                 | 0.908                           | 0.689                                              | 0.005                           | 0.004                            | 0.004                                       | 0.132                             | -0.001                                         | 0.085                                          | 1.193                                            | 0.770                              | 0.372                                                   | 0.321                                     | 1.895                                          | 0.169                                        | 0.487                                                   | 0.270                                              | 0.048                            | 0.440                                   | 0.326                                               | 0.004                           | 0.002                                       | 0.003                                                  | 0.002                                                  |
| <b>Mean</b>                           | <b>0.918</b>                    | <b>0.692</b>                                       | <b>0.005</b>                    | <b>0.004</b>                     | <b>0.004</b>                                | <b>0.132</b>                      | <b>-0.001</b>                                  | <b>0.087</b>                                   | <b>1.238</b>                                     | <b>0.738</b>                       | <b>0.374</b>                                            | <b>0.323</b>                              | <b>1.902</b>                                   | <b>0.167</b>                                 | <b>0.480</b>                                            | <b>0.266</b>                                       | <b>0.049</b>                     | <b>0.445</b>                            | <b>0.339</b>                                        | <b>0.003</b>                    | <b>0.002</b>                                | <b>0.003</b>                                           | <b>0.001</b>                                           |
| <b>SD</b>                             | <b>0.023</b>                    | <b>0.009</b>                                       | <b>0.001</b>                    | <b>0.001</b>                     | <b>0.000</b>                                | <b>0.003</b>                      | <b>0.001</b>                                   | <b>0.004</b>                                   | <b>0.040</b>                                     | <b>0.030</b>                       | <b>0.004</b>                                            | <b>0.002</b>                              | <b>0.009</b>                                   | <b>0.003</b>                                 | <b>0.007</b>                                            | <b>0.005</b>                                       | <b>0.002</b>                     | <b>0.004</b>                            | <b>0.009</b>                                        | <b>0.000</b>                    | <b>0.000</b>                                | <b>0.001</b>                                           | <b>0.000</b>                                           |
| <b>%RSD</b>                           | <b>2.5</b>                      | <b>1.3</b>                                         | <b>11.9</b>                     | <b>34.3</b>                      | <b>11.4</b>                                 | <b>2.5</b>                        | <b>-204.5</b>                                  | <b>4.9</b>                                     | <b>3.2</b>                                       | <b>4.1</b>                         | <b>1.0</b>                                              | <b>0.55</b>                               | <b>0.50</b>                                    | <b>1.5</b>                                   | <b>1.4</b>                                              | <b>1.9</b>                                         | <b>3.3</b>                       | <b>0.93</b>                             | <b>2.8</b>                                          | <b>11.9</b>                     | <b>16.3</b>                                 | <b>24.1</b>                                            | <b>30.4</b>                                            |
| 500–1                                 | 1.914                           | 1.393                                              | 0.012                           | 0.007                            | 0.013                                       | 0.270                             | 0.008                                          | 0.049                                          | 0.569                                            | 0.424                              | 0.745                                                   | 0.643                                     | 3.235                                          | 0.355                                        | 0.864                                                   | 0.539                                              | 0.102                            | 0.917                                   | 0.633                                               | 0.008                           | 0.006                                       | 0.006                                                  | 0.006                                                  |
| 500–2                                 | 1.864                           | 1.383                                              | 0.013                           | 0.009                            | 0.012                                       | 0.266                             | 0.007                                          | 0.063                                          | 0.631                                            | 0.462                              | 0.727                                                   | 0.635                                     | 3.145                                          | 0.353                                        | 0.868                                                   | 0.544                                              | 0.104                            | 0.941                                   | 0.619                                               | 0.009                           | 0.007                                       | 0.009                                                  | 0.005                                                  |
| 500–3                                 | 1.884                           | 1.363                                              | 0.013                           | 0.009                            | 0.012                                       | 0.274                             | 0.012                                          | 0.067                                          | 0.816                                            | 0.507                              | 0.763                                                   | 0.636                                     | 3.165                                          | 0.349                                        | 0.844                                                   | 0.543                                              | 0.107                            | 0.918                                   | 0.645                                               | 0.009                           | 0.006                                       | 0.006                                                  | 0.006                                                  |
| 500–4                                 | 1.904                           | 1.363                                              | 0.011                           | 0.008                            | 0.011                                       | 0.271                             | 0.008                                          | 0.060                                          | 0.835                                            | 0.497                              | 0.729                                                   | 0.625                                     | 3.155                                          | 0.357                                        | 0.839                                                   | 0.551                                              | 0.107                            | 0.912                                   | 0.625                                               | 0.008                           | 0.005                                       | 0.007                                                  | 0.004                                                  |
| 500–5                                 | 1.934                           | 1.373                                              | 0.013                           | 0.011                            | 0.013                                       | 0.269                             | 0.008                                          | 0.059                                          | 0.799                                            | 0.508                              | 0.722                                                   | 0.618                                     | 3.165                                          | 0.343                                        | 0.851                                                   | 0.547                                              | 0.108                            | 0.912                                   | 0.625                                               | 0.009                           | 0.006                                       | 0.007                                                  | 0.003                                                  |
| 500–6                                 | 1.904                           | 1.373                                              | 0.010                           | 0.009                            | 0.011                                       | 0.280                             | 0.009                                          | 0.070                                          | 0.674                                            | 0.576                              | 0.691                                                   | 0.615                                     | 3.125                                          | 0.358                                        | 0.847                                                   | 0.542                                              | 0.102                            | 0.917                                   | 0.621                                               | 0.008                           | 0.006                                       | 0.006                                                  | 0.005                                                  |
| <b>Mean</b>                           | <b>1.901</b>                    | <b>1.375</b>                                       | <b>0.012</b>                    | <b>0.009</b>                     | <b>0.012</b>                                | <b>0.272</b>                      | <b>0.009</b>                                   | <b>0.061</b>                                   | <b>0.721</b>                                     | <b>0.495</b>                       | <b>0.730</b>                                            | <b>0.629</b>                              | <b>3.165</b>                                   | <b>0.353</b>                                 | <b>0.853</b>                                            | <b>0.544</b>                                       | <b>0.105</b>                     | <b>0.919</b>                            | <b>0.628</b>                                        | <b>0.008</b>                    | <b>0.006</b>                                | <b>0.007</b>                                           | <b>0.005</b>                                           |
| <b>SD</b>                             | <b>0.022</b>                    | <b>0.011</b>                                       | <b>0.001</b>                    | <b>0.001</b>                     | <b>0.001</b>                                | <b>0.004</b>                      | <b>0.002</b>                                   | <b>0.007</b>                                   | <b>0.101</b>                                     | <b>0.047</b>                       | <b>0.022</b>                                            | <b>0.010</b>                              | <b>0.034</b>                                   | <b>0.005</b>                                 | <b>0.010</b>                                            | <b>0.004</b>                                       | <b>0.002</b>                     | <b>0.010</b>                            | <b>0.009</b>                                        | <b>0.000</b>                    | <b>0.001</b>                                | <b>0.001</b>                                           | <b>0.001</b>                                           |
| <b>%RSD</b>                           | <b>1.2</b>                      | <b>0.78</b>                                        | <b>8.1</b>                      | <b>14.5</b>                      | <b>6.7</b>                                  | <b>1.6</b>                        | <b>20.6</b>                                    | <b>10.7</b>                                    | <b>14.1</b>                                      | <b>9.4</b>                         | <b>3.0</b>                                              | <b>1.6</b>                                | <b>1.1</b>                                     | <b>1.5</b>                                   | <b>1.2</b>                                              | <b>0.70</b>                                        | <b>2.3</b>                       | <b>1.1</b>                              | <b>1.4</b>                                          | <b>5.6</b>                      | <b>9.1</b>                                  | <b>15.3</b>                                            | <b>18.3</b>                                            |

**Table S15.** SIFT-MS repeatability data for Mix 2 in 100% DMI at three levels (50, 250, and 500).

| Level-Replicate<br>Number; Statistics | Acetone<br>(NO <sup>+</sup> 88) | Acetonitrile<br>(H <sub>3</sub> O <sup>+</sup> 42) | Benzene<br>(NO <sup>+</sup> 78) | Benzene<br>(NO <sup>+</sup> 108) | Benzene<br>(O <sub>2</sub> <sup>+</sup> 78) | 1-Butanol<br>(NO <sup>+</sup> 73) | Chloroform<br>(O <sub>2</sub> <sup>+</sup> 83) | Chloroform<br>(O <sub>2</sub> <sup>+</sup> 85) | Isooctane<br>(H <sub>3</sub> O <sup>+</sup> 113) | Isooctane<br>(NO <sup>+</sup> 113) | Isopropyl alcohol<br>(H <sub>3</sub> O <sup>+</sup> 43) | Isopropyl alcohol<br>(NO <sup>+</sup> 59) | Methanol<br>(H <sub>3</sub> O <sup>+</sup> 33) | Methyl ethyl ketone<br>(NO <sup>+</sup> 102) | Methyl ethyl ketone<br>(O <sub>2</sub> <sup>+</sup> 72) | Nitromethane<br>(H <sub>3</sub> O <sup>+</sup> 62) | Propanal<br>(NO <sup>+</sup> 57) | Tetrahydrofuran<br>(NO <sup>+</sup> 71) | Tetrahydrofuran<br>(O <sub>2</sub> <sup>+</sup> 71) | Toluene<br>(NO <sup>+</sup> 92) | Toluene<br>(O <sub>2</sub> <sup>+</sup> 92) | Trichloroethylene<br>(O <sub>2</sub> <sup>+</sup> 130) | Trichloroethylene<br>(O <sub>2</sub> <sup>+</sup> 132) |
|---------------------------------------|---------------------------------|----------------------------------------------------|---------------------------------|----------------------------------|---------------------------------------------|-----------------------------------|------------------------------------------------|------------------------------------------------|--------------------------------------------------|------------------------------------|---------------------------------------------------------|-------------------------------------------|------------------------------------------------|----------------------------------------------|---------------------------------------------------------|----------------------------------------------------|----------------------------------|-----------------------------------------|-----------------------------------------------------|---------------------------------|---------------------------------------------|--------------------------------------------------------|--------------------------------------------------------|
| 50-1                                  | 0.180                           | 0.109                                              | 0.070                           | 0.041                            | 0.072                                       | 0.014                             | 0.021                                          | 0.009                                          | -0.110                                           | 0.110                              | 0.054                                                   | 0.049                                     | 0.128                                          | 0.068                                        | 0.161                                                   | 0.042                                              | 0.085                            | 0.177                                   | 0.113                                               | 0.034                           | 0.026                                       | 0.031                                                  | 0.030                                                  |
| 50-2                                  | 0.180                           | 0.110                                              | 0.064                           | 0.043                            | 0.073                                       | 0.016                             | 0.020                                          | -0.008                                         | -0.040                                           | 0.110                              | 0.055                                                   | 0.061                                     | 0.135                                          | 0.067                                        | 0.153                                                   | 0.043                                              | 0.083                            | 0.192                                   | 0.117                                               | 0.034                           | 0.028                                       | 0.028                                                  | 0.029                                                  |
| 50-3                                  | 0.175                           | 0.108                                              | 0.068                           | 0.043                            | 0.076                                       | 0.019                             | 0.021                                          | 0.010                                          | 0.270                                            | 0.240                              | 0.058                                                   | 0.063                                     | 0.131                                          | 0.068                                        | 0.170                                                   | 0.043                                              | 0.084                            | 0.191                                   | 0.133                                               | 0.033                           | 0.026                                       | 0.030                                                  | 0.023                                                  |
| 50-4                                  | 0.174                           | 0.113                                              | 0.067                           | 0.047                            | 0.069                                       | 0.017                             | 0.019                                          | -0.015                                         | -0.020                                           | 0.000                              | 0.051                                                   | 0.058                                     | 0.129                                          | 0.066                                        | 0.151                                                   | 0.043                                              | 0.084                            | 0.177                                   | 0.113                                               | 0.032                           | 0.025                                       | 0.027                                                  | 0.029                                                  |
| 50-5                                  | 0.176                           | 0.113                                              | 0.069                           | 0.049                            | 0.069                                       | 0.015                             | 0.024                                          | 0.014                                          | 0.150                                            | 0.180                              | 0.057                                                   | 0.062                                     | 0.135                                          | 0.066                                        | 0.161                                                   | 0.042                                              | 0.083                            | 0.180                                   | 0.126                                               | 0.031                           | 0.026                                       | 0.024                                                  | 0.026                                                  |
| 50-6                                  | 0.174                           | 0.117                                              | 0.071                           | 0.038                            | 0.070                                       | 0.018                             | 0.017                                          | -0.014                                         | -0.140                                           | 0.020                              | 0.062                                                   | 0.057                                     | 0.131                                          | 0.063                                        | 0.150                                                   | 0.044                                              | 0.081                            | 0.181                                   | 0.107                                               | 0.033                           | 0.027                                       | 0.028                                                  | 0.026                                                  |
| <b>Mean</b>                           | <b>0.177</b>                    | <b>0.112</b>                                       | <b>0.068</b>                    | <b>0.043</b>                     | <b>0.071</b>                                | <b>0.017</b>                      | <b>0.020</b>                                   | <b>-0.001</b>                                  | <b>0.018</b>                                     | <b>0.110</b>                       | <b>0.056</b>                                            | <b>0.058</b>                              | <b>0.132</b>                                   | <b>0.066</b>                                 | <b>0.158</b>                                            | <b>0.043</b>                                       | <b>0.084</b>                     | <b>0.183</b>                            | <b>0.118</b>                                        | <b>0.033</b>                    | <b>0.026</b>                                | <b>0.028</b>                                           | <b>0.027</b>                                           |
| <b>SD</b>                             | <b>0.0026</b>                   | <b>0.0030</b>                                      | <b>0.0023</b>                   | <b>0.0036</b>                    | <b>0.0025</b>                               | <b>0.0018</b>                     | <b>0.0021</b>                                  | <b>0.0120</b>                                  | <b>0.1455</b>                                    | <b>0.0837</b>                      | <b>0.0035</b>                                           | <b>0.0047</b>                             | <b>0.0027</b>                                  | <b>0.0015</b>                                | <b>0.0071</b>                                           | <b>0.0006</b>                                      | <b>0.0012</b>                    | <b>0.0062</b>                           | <b>0.0088</b>                                       | <b>0.0010</b>                   | <b>0.0007</b>                               | <b>0.0024</b>                                          | <b>0.0021</b>                                          |
| <b>%RSD</b>                           | <b>1.5</b>                      | <b>2.7</b>                                         | <b>3.3</b>                      | <b>8.2</b>                       | <b>3.5</b>                                  | <b>11.1</b>                       | <b>10.3</b>                                    | <b>-1795.1</b>                                 | <b>793.8</b>                                     | <b>76.1</b>                        | <b>6.3</b>                                              | <b>8.0</b>                                | <b>2.1</b>                                     | <b>2.3</b>                                   | <b>4.5</b>                                              | <b>1.5</b>                                         | <b>1.5</b>                       | <b>3.4</b>                              | <b>7.4</b>                                          | <b>3.2</b>                      | <b>2.8</b>                                  | <b>8.5</b>                                             | <b>7.9</b>                                             |
| 250-1                                 | 0.920                           | 0.553                                              | 0.401                           | 0.270                            | 0.434                                       | 0.076                             | 0.133                                          | 0.033                                          | 1.120                                            | 0.100                              | 0.286                                                   | 0.253                                     | 0.557                                          | 0.359                                        | 0.748                                                   | 0.217                                              | 0.578                            | 0.950                                   | 0.578                                               | 0.194                           | 0.169                                       | 0.186                                                  | 0.165                                                  |
| 250-2                                 | 0.949                           | 0.571                                              | 0.422                           | 0.270                            | 0.418                                       | 0.078                             | 0.131                                          | 0.019                                          | 0.310                                            | -0.066                             | 0.298                                                   | 0.260                                     | 0.553                                          | 0.372                                        | 0.739                                                   | 0.218                                              | 0.578                            | 0.952                                   | 0.585                                               | 0.195                           | 0.172                                       | 0.178                                                  | 0.165                                                  |
| 250-3                                 | 0.941                           | 0.563                                              | 0.396                           | 0.268                            | 0.429                                       | 0.074                             | 0.126                                          | 0.030                                          | 0.290                                            | 0.070                              | 0.290                                                   | 0.259                                     | 0.553                                          | 0.362                                        | 0.753                                                   | 0.209                                              | 0.603                            | 0.929                                   | 0.603                                               | 0.204                           | 0.166                                       | 0.183                                                  | 0.182                                                  |
| 250-4                                 | 0.890                           | 0.529                                              | 0.411                           | 0.263                            | 0.423                                       | 0.073                             | 0.131                                          | 0.028                                          | -0.070                                           | 0.210                              | 0.285                                                   | 0.249                                     | 0.519                                          | 0.345                                        | 0.742                                                   | 0.212                                              | 0.512                            | 0.903                                   | 0.604                                               | 0.193                           | 0.166                                       | 0.179                                                  | 0.180                                                  |
| 250-5                                 | 0.929                           | 0.575                                              | 0.422                           | 0.258                            | 0.423                                       | 0.075                             | 0.125                                          | 0.031                                          | 0.120                                            | 0.090                              | 0.290                                                   | 0.254                                     | 0.551                                          | 0.362                                        | 0.736                                                   | 0.211                                              | 0.617                            | 0.932                                   | 0.594                                               | 0.200                           | 0.168                                       | 0.182                                                  | 0.179                                                  |
| 250-6                                 | 0.919                           | 0.564                                              | 0.414                           | 0.270                            | 0.414                                       | 0.074                             | 0.134                                          | 0.031                                          | 0.110                                            | 0.060                              | 0.294                                                   | 0.256                                     | 0.553                                          | 0.362                                        | 0.768                                                   | 0.220                                              | 0.647                            | 0.966                                   | 0.581                                               | 0.199                           | 0.167                                       | 0.181                                                  | 0.172                                                  |
| <b>Mean</b>                           | <b>0.925</b>                    | <b>0.559</b>                                       | <b>0.411</b>                    | <b>0.266</b>                     | <b>0.424</b>                                | <b>0.075</b>                      | <b>0.130</b>                                   | <b>0.029</b>                                   | <b>0.313</b>                                     | <b>0.077</b>                       | <b>0.290</b>                                            | <b>0.255</b>                              | <b>0.548</b>                                   | <b>0.361</b>                                 | <b>0.748</b>                                            | <b>0.214</b>                                       | <b>0.590</b>                     | <b>0.938</b>                            | <b>0.591</b>                                        | <b>0.198</b>                    | <b>0.168</b>                                | <b>0.181</b>                                           | <b>0.173</b>                                           |
| <b>SD</b>                             | <b>0.019</b>                    | <b>0.015</b>                                       | <b>0.010</b>                    | <b>0.005</b>                     | <b>0.007</b>                                | <b>0.002</b>                      | <b>0.003</b>                                   | <b>0.005</b>                                   | <b>0.382</b>                                     | <b>0.081</b>                       | <b>0.004</b>                                            | <b>0.004</b>                              | <b>0.013</b>                                   | <b>0.008</b>                                 | <b>0.011</b>                                            | <b>0.004</b>                                       | <b>0.042</b>                     | <b>0.020</b>                            | <b>0.010</b>                                        | <b>0.004</b>                    | <b>0.002</b>                                | <b>0.003</b>                                           | <b>0.007</b>                                           |
| <b>%RSD</b>                           | <b>2.0</b>                      | <b>2.7</b>                                         | <b>2.4</b>                      | <b>1.7</b>                       | <b>1.6</b>                                  | <b>2.2</b>                        | <b>2.6</b>                                     | <b>15.9</b>                                    | <b>122.0</b>                                     | <b>104.5</b>                       | <b>1.5</b>                                              | <b>1.5</b>                                | <b>2.4</b>                                     | <b>2.2</b>                                   | <b>1.4</b>                                              | <b>1.9</b>                                         | <b>7.1</b>                       | <b>2.2</b>                              | <b>1.7</b>                                          | <b>2.0</b>                      | <b>1.2</b>                                  | <b>1.5</b>                                             | <b>4.0</b>                                             |
| 500-1                                 | 1.882                           | 1.226                                              | 0.956                           | 0.627                            | 1.003                                       | 0.160                             | 0.357                                          | 0.202                                          | 18.840                                           | 0.640                              | 0.584                                                   | 0.590                                     | 1.035                                          | 0.773                                        | 1.557                                                   | 0.430                                              | 1.450                            | 1.976                                   | 1.269                                               | 0.473                           | 0.414                                       | 0.514                                                  | 0.447                                                  |
| 500-2                                 | 1.892                           | 1.136                                              | 0.970                           | 0.602                            | 1.023                                       | 0.165                             | 0.342                                          | 0.208                                          | 8.740                                            | 0.640                              | 0.567                                                   | 0.536                                     | 1.025                                          | 0.755                                        | 1.547                                                   | 0.430                                              | 1.440                            | 2.016                                   | 1.279                                               | 0.474                           | 0.427                                       | 0.479                                                  | 0.447                                                  |
| 500-3                                 | 1.892                           | 1.106                                              | 0.963                           | 0.646                            | 1.023                                       | 0.169                             | 0.334                                          | 0.198                                          | 4.970                                            | 0.630                              | 0.599                                                   | 0.528                                     | 1.065                                          | 0.778                                        | 1.597                                                   | 0.435                                              | 1.450                            | 2.026                                   | 1.289                                               | 0.470                           | 0.412                                       | 0.460                                                  | 0.470                                                  |
| 500-4                                 | 1.882                           | 1.096                                              | 0.970                           | 0.622                            | 1.023                                       | 0.166                             | 0.338                                          | 0.201                                          | 2.940                                            | 0.520                              | 0.584                                                   | 0.535                                     | 1.065                                          | 0.758                                        | 1.567                                                   | 0.431                                              | 1.430                            | 2.026                                   | 1.299                                               | 0.470                           | 0.417                                       | 0.465                                                  | 0.454                                                  |
| 500-5                                 | 1.902                           | 1.096                                              | 0.976                           | 0.620                            | 1.003                                       | 0.168                             | 0.327                                          | 0.184                                          | 2.120                                            | 0.520                              | 0.580                                                   | 0.526                                     | 1.035                                          | 0.758                                        | 1.537                                                   | 0.438                                              | 1.450                            | 1.956                                   | 1.309                                               | 0.488                           | 0.413                                       | 0.487                                                  | 0.472                                                  |
| 500-6                                 | 1.822                           | 1.076                                              | 0.955                           | 0.625                            | 1.023                                       | 0.161                             | 0.328                                          | 0.185                                          | 1.620                                            | 0.450                              | 0.582                                                   | 0.522                                     | 1.035                                          | 0.751                                        | 1.537                                                   | 0.431                                              | 1.410                            | 1.926                                   | 1.259                                               | 0.478                           | 0.415                                       | 0.458                                                  | 0.445                                                  |
| <b>Mean</b>                           | <b>1.879</b>                    | <b>1.123</b>                                       | <b>0.965</b>                    | <b>0.623</b>                     | <b>1.017</b>                                | <b>0.165</b>                      | <b>0.338</b>                                   | <b>0.196</b>                                   | <b>6.538</b>                                     | <b>0.567</b>                       | <b>0.583</b>                                            | <b>0.540</b>                              | <b>1.043</b>                                   | <b>0.763</b>                                 | <b>1.557</b>                                            | <b>0.432</b>                                       | <b>1.439</b>                     | <b>1.987</b>                            | <b>1.284</b>                                        | <b>0.476</b>                    | <b>0.417</b>                                | <b>0.477</b>                                           | <b>0.455</b>                                           |
| <b>SD</b>                             | <b>0.026</b>                    | <b>0.050</b>                                       | <b>0.008</b>                    | <b>0.013</b>                     | <b>0.009</b>                                | <b>0.003</b>                      | <b>0.010</b>                                   | <b>0.009</b>                                   | <b>5.990</b>                                     | <b>0.074</b>                       | <b>0.009</b>                                            | <b>0.023</b>                              | <b>0.016</b>                                   | <b>0.010</b>                                 | <b>0.021</b>                                            | <b>0.003</b>                                       | <b>0.015</b>                     | <b>0.038</b>                            | <b>0.017</b>                                        | <b>0.006</b>                    | <b>0.005</b>                                | <b>0.019</b>                                           | <b>0.011</b>                                           |
| <b>%RSD</b>                           | <b>1.4</b>                      | <b>4.4</b>                                         | <b>0.80</b>                     | <b>2.1</b>                       | <b>0.93</b>                                 | <b>2.0</b>                        | <b>3.0</b>                                     | <b>4.5</b>                                     | <b>91.6</b>                                      | <b>13.0</b>                        | <b>1.6</b>                                              | <b>4.3</b>                                | <b>1.5</b>                                     | <b>1.3</b>                                   | <b>1.3</b>                                              | <b>0.69</b>                                        | <b>1.0</b>                       | <b>1.9</b>                              | <b>1.3</b>                                          | <b>1.3</b>                      | <b>1.2</b>                                  | <b>4.1</b>                                             | <b>2.4</b>                                             |



**Table S16a.** SIFT-MS repeatability data for Mix 1 in 5% DMSO:95% water at three levels (50, 250, and 500).

| Level—Replicate<br>Number; Statistics | Acetone<br>(NO <sup>+</sup> 88) | Acetonitrile<br>(H <sub>3</sub> O <sup>+</sup> 42) | Benzene<br>(NO <sup>+</sup> 78) | Benzene<br>(NO <sup>+</sup> 108) | Benzene<br>(O <sub>2</sub> <sup>+</sup> 78) | 1-Butanol<br>(NO <sup>+</sup> 73) | Chloroform<br>(O <sub>2</sub> <sup>+</sup> 83) | Chloroform<br>(O <sub>2</sub> <sup>+</sup> 85) | Isooctane<br>(H <sub>3</sub> O <sup>+</sup> 113) | Isooctane<br>(NO <sup>+</sup> 113) | Isopropyl alcohol<br>(H <sub>3</sub> O <sup>+</sup> 43) | Isopropyl alcohol<br>(NO <sup>+</sup> 59) | Methanol<br>(H <sub>3</sub> O <sup>+</sup> 33) | Methyl ethyl ketone<br>(NO <sup>+</sup> 102) | Methyl ethyl ketone<br>(O <sub>2</sub> <sup>+</sup> 72) | Nitromethane<br>(H <sub>3</sub> O <sup>+</sup> 62) | Propanal<br>(NO <sup>+</sup> 57) | Tetrahydrofuran<br>(NO <sup>+</sup> 71) | Tetrahydrofuran<br>(O <sub>2</sub> <sup>+</sup> 71) | Toluene<br>(NO <sup>+</sup> 92) | Toluene<br>(O <sub>2</sub> <sup>+</sup> 92) | Trichloroethylene<br>(O <sub>2</sub> <sup>+</sup> 130) | Trichloroethylene<br>(O <sub>2</sub> <sup>+</sup> 132) |
|---------------------------------------|---------------------------------|----------------------------------------------------|---------------------------------|----------------------------------|---------------------------------------------|-----------------------------------|------------------------------------------------|------------------------------------------------|--------------------------------------------------|------------------------------------|---------------------------------------------------------|-------------------------------------------|------------------------------------------------|----------------------------------------------|---------------------------------------------------------|----------------------------------------------------|----------------------------------|-----------------------------------------|-----------------------------------------------------|---------------------------------|---------------------------------------------|--------------------------------------------------------|--------------------------------------------------------|
| 50–1                                  | 0.341                           | 0.216                                              | 0.070                           | 0.052                            | 0.027                                       | 0.352                             | 0.204                                          | 0.177                                          | 0.121                                            | 0.087                              | 0.165                                                   | 0.171                                     | 0.201                                          | 0.182                                        | 0.313                                                   | 0.279                                              | 0.099                            | 0.207                                   | 0.133                                               | 0.085                           | 0.070                                       | 0.074                                                  | 0.077                                                  |
| 50–2                                  | 0.353                           | 0.225                                              | 0.160                           | 0.015                            | 0.106                                       | 0.350                             | 0.198                                          | 0.175                                          | 0.138                                            | 0.084                              | 0.170                                                   | 0.178                                     | 0.227                                          | 0.183                                        | 0.315                                                   | 0.275                                              | 0.099                            | 0.205                                   | 0.127                                               | 0.084                           | 0.065                                       | 0.073                                                  | 0.068                                                  |
| 50–3                                  | 0.344                           | 0.214                                              | -0.060                          | 0.022                            | -0.050                                      | 0.355                             | 0.186                                          | 0.168                                          | 0.123                                            | 0.084                              | 0.161                                                   | 0.161                                     | 0.204                                          | 0.175                                        | 0.301                                                   | 0.263                                              | 0.097                            | 0.205                                   | 0.129                                               | 0.083                           | 0.065                                       | 0.067                                                  | 0.069                                                  |
| 50–4                                  | 0.377                           | 0.244                                              | 0.380                           | 0.078                            | 0.276                                       | 0.369                             | 0.209                                          | 0.191                                          | 0.106                                            | 0.084                              | 0.184                                                   | 0.182                                     | 0.219                                          | 0.193                                        | 0.323                                                   | 0.296                                              | 0.097                            | 0.221                                   | 0.135                                               | 0.088                           | 0.068                                       | 0.073                                                  | 0.067                                                  |
| 50–5                                  | 0.345                           | 0.220                                              | -0.030                          | 0.048                            | -0.035                                      | 0.352                             | 0.202                                          | 0.174                                          | 0.097                                            | 0.083                              | 0.173                                                   | 0.169                                     | 0.207                                          | 0.176                                        | 0.314                                                   | 0.279                                              | 0.100                            | 0.207                                   | 0.133                                               | 0.079                           | 0.066                                       | 0.067                                                  | 0.069                                                  |
| 50–6                                  | 0.331                           | 0.206                                              | -0.120                          | 0.021                            | -0.099                                      | 0.344                             | 0.186                                          | 0.170                                          | 0.090                                            | 0.086                              | 0.164                                                   | 0.164                                     | 0.195                                          | 0.174                                        | 0.307                                                   | 0.271                                              | 0.100                            | 0.197                                   | 0.126                                               | 0.082                           | 0.066                                       | 0.066                                                  | 0.064                                                  |
| <b>Mean</b>                           | <b>0.349</b>                    | <b>0.221</b>                                       | <b>0.067</b>                    | <b>0.039</b>                     | <b>0.037</b>                                | <b>0.353</b>                      | <b>0.198</b>                                   | <b>0.176</b>                                   | <b>0.113</b>                                     | <b>0.085</b>                       | <b>0.170</b>                                            | <b>0.171</b>                              | <b>0.208</b>                                   | <b>0.181</b>                                 | <b>0.312</b>                                            | <b>0.277</b>                                       | <b>0.099</b>                     | <b>0.207</b>                            | <b>0.130</b>                                        | <b>0.084</b>                    | <b>0.067</b>                                | <b>0.070</b>                                           | <b>0.069</b>                                           |
| <b>SD</b>                             | <b>0.0143</b>                   | <b>0.0119</b>                                      | <b>0.1669</b>                   | <b>0.0222</b>                    | <b>0.1247</b>                               | <b>0.0076</b>                     | <b>0.0088</b>                                  | <b>0.0074</b>                                  | <b>0.0164</b>                                    | <b>0.0015</b>                      | <b>0.0076</b>                                           | <b>0.0073</b>                             | <b>0.0109</b>                                  | <b>0.0066</b>                                | <b>0.0068</b>                                           | <b>0.0100</b>                                      | <b>0.0012</b>                    | <b>0.0071</b>                           | <b>0.0034</b>                                       | <b>0.0028</b>                   | <b>0.0016</b>                               | <b>0.0034</b>                                          | <b>0.0042</b>                                          |
| <b>%RSD</b>                           | <b>4.1</b>                      | <b>5.4</b>                                         | <b>250.3</b>                    | <b>56.5</b>                      | <b>332.4</b>                                | <b>2.2</b>                        | <b>4.4</b>                                     | <b>4.2</b>                                     | <b>14.6</b>                                      | <b>1.7</b>                         | <b>4.5</b>                                              | <b>4.3</b>                                | <b>5.2</b>                                     | <b>3.6</b>                                   | <b>2.2</b>                                              | <b>3.6</b>                                         | <b>1.3</b>                       | <b>3.4</b>                              | <b>2.6</b>                                          | <b>3.3</b>                      | <b>2.4</b>                                  | <b>4.9</b>                                             | <b>6.1</b>                                             |
| 250–1                                 | 1.69                            | 1.19                                               | 0.350                           | 0.390                            | 0.446                                       | 1.59                              | 1.42                                           | 1.34                                           | 0.737                                            | 0.741                              | 0.809                                                   | 0.820                                     | 0.956                                          | 0.871                                        | 1.48                                                    | 1.29                                               | 0.755                            | 0.986                                   | 0.632                                               | 0.614                           | 0.507                                       | 0.599                                                  | 0.554                                                  |
| 250–2                                 | 1.68                            | 1.21                                               | 0.550                           | 0.377                            | 0.566                                       | 1.64                              | 1.50                                           | 1.39                                           | 0.794                                            | 0.799                              | 0.807                                                   | 0.828                                     | 0.967                                          | 0.890                                        | 1.53                                                    | 1.29                                               | 0.802                            | 1.02                                    | 0.663                                               | 0.642                           | 0.543                                       | 0.643                                                  | 0.590                                                  |
| 250–3                                 | 1.76                            | 1.24                                               | 0.340                           | 0.367                            | 0.416                                       | 1.67                              | 1.50                                           | 1.43                                           | 0.760                                            | 0.755                              | 0.820                                                   | 0.822                                     | 0.991                                          | 0.913                                        | 1.56                                                    | 1.33                                               | 0.789                            | 1.03                                    | 0.664                                               | 0.652                           | 0.551                                       | 0.638                                                  | 0.606                                                  |
| 250–4                                 | 1.70                            | 1.19                                               | 1.06                            | 0.405                            | 0.956                                       | 1.69                              | 1.50                                           | 1.42                                           | 0.782                                            | 0.755                              | 0.827                                                   | 0.819                                     | 0.952                                          | 0.886                                        | 1.54                                                    | 1.35                                               | 0.786                            | 1.01                                    | 0.659                                               | 0.621                           | 0.548                                       | 0.598                                                  | 0.598                                                  |
| 250–5                                 | 1.95                            | 1.47                                               | 2.37                            | 0.475                            | 1.98                                        | 1.86                              | 1.66                                           | 1.52                                           | 0.714                                            | 0.668                              | 0.822                                                   | 0.957                                     | 1.161                                          | 0.993                                        | 1.65                                                    | 1.52                                               | 0.738                            | 1.12                                    | 0.722                                               | 0.695                           | 0.596                                       | 0.634                                                  | 0.620                                                  |
| 250–6                                 | 1.88                            | 1.42                                               | 0.940                           | 0.408                            | 0.826                                       | 1.93                              | 1.63                                           | 1.56                                           | 0.666                                            | 0.706                              | 0.788                                                   | 0.899                                     | 1.101                                          | 0.933                                        | 1.60                                                    | 1.49                                               | 0.742                            | 1.08                                    | 0.683                                               | 0.692                           | 0.589                                       | 0.645                                                  | 0.618                                                  |
| <b>Mean</b>                           | <b>1.77</b>                     | <b>1.29</b>                                        | <b>0.935</b>                    | <b>0.404</b>                     | <b>0.864</b>                                | <b>1.73</b>                       | <b>1.54</b>                                    | <b>1.44</b>                                    | <b>0.742</b>                                     | <b>0.737</b>                       | <b>0.812</b>                                            | <b>0.857</b>                              | <b>1.021</b>                                   | <b>0.914</b>                                 | <b>1.56</b>                                             | <b>1.38</b>                                        | <b>0.769</b>                     | <b>1.04</b>                             | <b>0.670</b>                                        | <b>0.653</b>                    | <b>0.556</b>                                | <b>0.627</b>                                           | <b>0.598</b>                                           |
| <b>SD</b>                             | <b>0.103</b>                    | <b>0.114</b>                                       | <b>0.698</b>                    | <b>0.035</b>                     | <b>0.534</b>                                | <b>0.122</b>                      | <b>0.083</b>                                   | <b>0.075</b>                                   | <b>0.043</b>                                     | <b>0.041</b>                       | <b>0.013</b>                                            | <b>0.053</b>                              | <b>0.080</b>                                   | <b>0.040</b>                                 | <b>0.054</b>                                            | <b>0.092</b>                                       | <b>0.025</b>                     | <b>0.046</b>                            | <b>0.027</b>                                        | <b>0.031</b>                    | <b>0.030</b>                                | <b>0.020</b>                                           | <b>0.022</b>                                           |
| <b>%RSD</b>                           | <b>5.8</b>                      | <b>8.9</b>                                         | <b>74.6</b>                     | <b>8.7</b>                       | <b>61.8</b>                                 | <b>7.1</b>                        | <b>5.4</b>                                     | <b>5.2</b>                                     | <b>5.8</b>                                       | <b>5.6</b>                         | <b>1.6</b>                                              | <b>6.1</b>                                | <b>7.9</b>                                     | <b>4.4</b>                                   | <b>3.4</b>                                              | <b>6.7</b>                                         | <b>3.2</b>                       | <b>4.4</b>                              | <b>4.1</b>                                          | <b>4.8</b>                      | <b>5.4</b>                                  | <b>3.2</b>                                             | <b>3.7</b>                                             |
| 500–1                                 | 3.37                            | 2.52                                               | 1.38                            | 1.03                             | 1.56                                        | 3.20                              | 3.67                                           | 3.48                                           | 2.25                                             | 2.20                               | 1.63                                                    | 1.63                                      | 1.95                                           | 1.82                                         | 3.12                                                    | 2.61                                               | 2.14                             | 2.05                                    | 1.40                                                | 1.60                            | 1.42                                        | 1.63                                                   | 1.59                                                   |
| 500–2                                 | 3.48                            | 2.52                                               | 1.24                            | 1.02                             | 1.48                                        | 3.20                              | 3.73                                           | 3.38                                           | 2.17                                             | 2.08                               | 1.61                                                    | 1.66                                      | 1.96                                           | 1.82                                         | 3.09                                                    | 2.54                                               | 2.03                             | 2.03                                    | 1.36                                                | 1.56                            | 1.41                                        | 1.60                                                   | 1.58                                                   |
| 500–3                                 | 3.40                            | 2.49                                               | 1.48                            | 0.997                            | 1.64                                        | 3.19                              | 3.69                                           | 3.44                                           | 2.22                                             | 2.07                               | 1.59                                                    | 1.62                                      | 1.93                                           | 1.81                                         | 3.13                                                    | 2.53                                               | 2.06                             | 2.05                                    | 1.39                                                | 1.58                            | 1.40                                        | 1.63                                                   | 1.60                                                   |
| 500–4                                 | 3.41                            | 2.52                                               | 1.36                            | 0.987                            | 1.49                                        | 3.25                              | 3.70                                           | 3.52                                           | 2.13                                             | 2.06                               | 1.65                                                    | 1.64                                      | 1.94                                           | 1.83                                         | 3.20                                                    | 2.65                                               | 2.05                             | 2.07                                    | 1.42                                                | 1.59                            | 1.41                                        | 1.67                                                   | 1.55                                                   |
| 500–5                                 | 3.93                            | 2.84                                               | 1.28                            | 1.06                             | 1.50                                        | 3.57                              | 4.05                                           | 3.74                                           | 2.08                                             | 2.04                               | 1.80                                                    | 1.80                                      | 2.14                                           | 1.97                                         | 3.48                                                    | 2.91                                               | 2.04                             | 2.27                                    | 1.58                                                | 1.70                            | 1.50                                        | 1.75                                                   | 1.69                                                   |
| 500–6                                 | 3.40                            | 2.48                                               | 1.10                            | 1.03                             | 1.33                                        | 3.23                              | 3.66                                           | 3.51                                           | 2.02                                             | 2.08                               | 1.62                                                    | 1.60                                      | 1.89                                           | 1.80                                         | 3.17                                                    | 2.62                                               | 2.04                             | 2.06                                    | 1.38                                                | 1.61                            | 1.41                                        | 1.67                                                   | 1.63                                                   |
| <b>Mean</b>                           | <b>3.49</b>                     | <b>2.56</b>                                        | <b>1.31</b>                     | <b>1.02</b>                      | <b>1.50</b>                                 | <b>3.27</b>                       | <b>3.75</b>                                    | <b>3.51</b>                                    | <b>2.15</b>                                      | <b>2.09</b>                        | <b>1.65</b>                                             | <b>1.66</b>                               | <b>1.97</b>                                    | <b>1.84</b>                                  | <b>3.20</b>                                             | <b>2.64</b>                                        | <b>2.06</b>                      | <b>2.09</b>                             | <b>1.43</b>                                         | <b>1.60</b>                     | <b>1.42</b>                                 | <b>1.65</b>                                            | <b>1.60</b>                                            |
| <b>SD</b>                             | <b>0.196</b>                    | <b>0.125</b>                                       | <b>0.120</b>                    | <b>0.023</b>                     | <b>0.094</b>                                | <b>0.134</b>                      | <b>0.136</b>                                   | <b>0.112</b>                                   | <b>0.079</b>                                     | <b>0.052</b>                       | <b>0.070</b>                                            | <b>0.066</b>                              | <b>0.080</b>                                   | <b>0.058</b>                                 | <b>0.131</b>                                            | <b>0.127</b>                                       | <b>0.037</b>                     | <b>0.082</b>                            | <b>0.073</b>                                        | <b>0.045</b>                    | <b>0.034</b>                                | <b>0.048</b>                                           | <b>0.044</b>                                           |
| <b>%RSD</b>                           | <b>5.6</b>                      | <b>4.9</b>                                         | <b>9.2</b>                      | <b>2.2</b>                       | <b>6.3</b>                                  | <b>4.1</b>                        | <b>3.6</b>                                     | <b>3.2</b>                                     | <b>3.7</b>                                       | <b>2.5</b>                         | <b>4.2</b>                                              | <b>4.0</b>                                | <b>4.1</b>                                     | <b>3.2</b>                                   | <b>4.1</b>                                              | <b>4.8</b>                                         | <b>1.8</b>                       | <b>3.9</b>                              | <b>5.1</b>                                          | <b>2.8</b>                      | <b>2.4</b>                                  | <b>2.9</b>                                             | <b>2.8</b>                                             |

**Table S16b.** SIFT-MS repeatability data for Mix 1 in 10% DMSO:90% water at three levels (50, 250, and 500).

| Level—Replicate<br>Number; Statistics | Acetone<br>(NO <sup>+</sup> 88) | Acetonitrile<br>(H <sub>3</sub> O <sup>+</sup> 42) | Benzene<br>(NO <sup>+</sup> 78) | Benzene<br>(NO <sup>+</sup> 108) | Benzene<br>(O <sub>2</sub> <sup>+</sup> 78) | 1-Butanol<br>(NO <sup>+</sup> 73) | Chloroform<br>(O <sub>2</sub> <sup>+</sup> 83) | Chloroform<br>(O <sub>2</sub> <sup>+</sup> 85) | Isooctane<br>(H <sub>3</sub> O <sup>+</sup> 113) | Isooctane<br>(NO <sup>+</sup> 113) | Isopropyl alcohol<br>(H <sub>3</sub> O <sup>+</sup> 43) | Isopropyl alcohol<br>(NO <sup>+</sup> 59) | Methanol<br>(H <sub>3</sub> O <sup>+</sup> 33) | Methyl ethyl ketone<br>(NO <sup>+</sup> 102) | Methyl ethyl ketone<br>(O <sub>2</sub> <sup>+</sup> 72) | Nitromethane<br>(H <sub>3</sub> O <sup>+</sup> 62) | Propanal<br>(NO <sup>+</sup> 57) | Tetrahydrofuran<br>(NO <sup>+</sup> 71) | Tetrahydrofuran<br>(O <sub>2</sub> <sup>+</sup> 71) | Toluene<br>(NO <sup>+</sup> 92) | Toluene<br>(O <sub>2</sub> <sup>+</sup> 92) | Trichloroethylene<br>(O <sub>2</sub> <sup>+</sup> 130) | Trichloroethylene<br>(O <sub>2</sub> <sup>+</sup> 132) |
|---------------------------------------|---------------------------------|----------------------------------------------------|---------------------------------|----------------------------------|---------------------------------------------|-----------------------------------|------------------------------------------------|------------------------------------------------|--------------------------------------------------|------------------------------------|---------------------------------------------------------|-------------------------------------------|------------------------------------------------|----------------------------------------------|---------------------------------------------------------|----------------------------------------------------|----------------------------------|-----------------------------------------|-----------------------------------------------------|---------------------------------|---------------------------------------------|--------------------------------------------------------|--------------------------------------------------------|
| 50–1                                  | 0.388                           | 0.289                                              | 0.520                           | 0.113                            | 0.419                                       | 0.358                             | 0.162                                          | 0.152                                          | 0.071                                            | 0.077                              | 0.184                                                   | 0.184                                     | 0.240                                          | 0.192                                        | 0.317                                                   | 0.291                                              | 0.093                            | 0.217                                   | 0.144                                               | 0.070                           | 0.054                                       | 0.064                                                  | 0.059                                                  |
| 50–2                                  | 0.343                           | 0.251                                              | 0.340                           | 0.076                            | 0.299                                       | 0.315                             | 0.142                                          | 0.138                                          | 0.004                                            | 0.068                              | 0.167                                                   | 0.162                                     | 0.204                                          | 0.169                                        | 0.277                                                   | 0.253                                              | 0.086                            | 0.194                                   | 0.116                                               | 0.066                           | 0.047                                       | 0.057                                                  | 0.050                                                  |
| 50–3                                  | 0.341                           | 0.247                                              | 0.200                           | 0.073                            | 0.219                                       | 0.310                             | 0.143                                          | 0.127                                          | 0.064                                            | 0.064                              | 0.160                                                   | 0.160                                     | 0.201                                          | 0.164                                        | 0.291                                                   | 0.250                                              | 0.082                            | 0.186                                   | 0.122                                               | 0.061                           | 0.048                                       | 0.053                                                  | 0.054                                                  |
| 50–4                                  | 0.355                           | 0.256                                              | 1.010                           | 0.167                            | 0.759                                       | 0.325                             | 0.136                                          | 0.140                                          | 0.046                                            | 0.069                              | 0.166                                                   | 0.161                                     | 0.204                                          | 0.169                                        | 0.297                                                   | 0.267                                              | 0.089                            | 0.194                                   | 0.129                                               | 0.058                           | 0.046                                       | 0.053                                                  | 0.052                                                  |
| 50–5                                  | 0.357                           | 0.263                                              | 1.400                           | 0.234                            | 1.049                                       | 0.343                             | 0.150                                          | 0.131                                          | 0.077                                            | 0.074                              | 0.184                                                   | 0.179                                     | 0.219                                          | 0.176                                        | 0.309                                                   | 0.270                                              | 0.092                            | 0.208                                   | 0.124                                               | 0.063                           | 0.047                                       | 0.053                                                  | 0.051                                                  |
| 50–6                                  | 0.323                           | 0.243                                              | 0.430                           | 0.075                            | 0.359                                       | 0.304                             | 0.139                                          | 0.131                                          | 0.095                                            | 0.066                              | 0.156                                                   | 0.156                                     | 0.196                                          | 0.157                                        | 0.273                                                   | 0.248                                              | 0.080                            | 0.187                                   | 0.116                                               | 0.054                           | 0.043                                       | 0.049                                                  | 0.046                                                  |
| <b>Mean</b>                           | <b>0.351</b>                    | <b>0.259</b>                                       | <b>0.650</b>                    | <b>0.123</b>                     | <b>0.517</b>                                | <b>0.326</b>                      | <b>0.145</b>                                   | <b>0.136</b>                                   | <b>0.060</b>                                     | <b>0.070</b>                       | <b>0.170</b>                                            | <b>0.167</b>                              | <b>0.211</b>                                   | <b>0.171</b>                                 | <b>0.294</b>                                            | <b>0.263</b>                                       | <b>0.087</b>                     | <b>0.198</b>                            | <b>0.125</b>                                        | <b>0.062</b>                    | <b>0.047</b>                                | <b>0.055</b>                                           | <b>0.052</b>                                           |
| <b>SD</b>                             | <b>0.0199</b>                   | <b>0.0152</b>                                      | <b>0.4195</b>                   | <b>0.0597</b>                    | <b>0.2923</b>                               | <b>0.0190</b>                     | <b>0.0086</b>                                  | <b>0.0082</b>                                  | <b>0.0288</b>                                    | <b>0.0046</b>                      | <b>0.0109</b>                                           | <b>0.0105</b>                             | <b>0.0149</b>                                  | <b>0.0109</b>                                | <b>0.0158</b>                                           | <b>0.0150</b>                                      | <b>0.0049</b>                    | <b>0.0112</b>                           | <b>0.0096</b>                                       | <b>0.0051</b>                   | <b>0.0033</b>                               | <b>0.0048</b>                                          | <b>0.0040</b>                                          |
| <b>%RSD</b>                           | <b>5.7</b>                      | <b>5.9</b>                                         | <b>64.5</b>                     | <b>48.5</b>                      | <b>56.5</b>                                 | <b>5.8</b>                        | <b>5.9</b>                                     | <b>6.0</b>                                     | <b>48.4</b>                                      | <b>6.5</b>                         | <b>6.4</b>                                              | <b>6.3</b>                                | <b>7.1</b>                                     | <b>6.4</b>                                   | <b>5.4</b>                                              | <b>5.7</b>                                         | <b>5.6</b>                       | <b>5.7</b>                              | <b>7.6</b>                                          | <b>8.1</b>                      | <b>6.9</b>                                  | <b>8.7</b>                                             | <b>7.6</b>                                             |
| 250–1                                 | 1.706                           | 1.243                                              | 0.460                           | 0.316                            | 0.519                                       | 1.515                             | 1.171                                          | 1.074                                          | 0.691                                            | 0.675                              | 0.824                                                   | 0.806                                     | 0.993                                          | 0.837                                        | 1.463                                                   | 1.299                                              | 0.681                            | 0.967                                   | 0.630                                               | 0.495                           | 0.406                                       | 0.479                                                  | 0.469                                                  |
| 250–2                                 | 1.686                           | 1.253                                              | 0.310                           | 0.333                            | 0.459                                       | 1.545                             | 1.181                                          | 1.074                                          | 0.602                                            | 0.655                              | 0.790                                                   | 0.797                                     | 1.003                                          | 0.845                                        | 1.463                                                   | 1.269                                              | 0.717                            | 0.994                                   | 0.638                                               | 0.477                           | 0.402                                       | 0.479                                                  | 0.477                                                  |
| 250–3                                 | 1.676                           | 1.263                                              | 0.340                           | 0.309                            | 0.469                                       | 1.515                             | 1.171                                          | 1.094                                          | 0.624                                            | 0.682                              | 0.803                                                   | 0.817                                     | 0.984                                          | 0.835                                        | 1.463                                                   | 1.279                                              | 0.708                            | 0.993                                   | 0.647                                               | 0.496                           | 0.423                                       | 0.507                                                  | 0.480                                                  |
| 250–4                                 | 1.756                           | 1.253                                              | 0.980                           | 0.347                            | 0.939                                       | 1.535                             | 1.211                                          | 1.114                                          | 0.605                                            | 0.681                              | 0.808                                                   | 0.811                                     | 0.993                                          | 0.855                                        | 1.463                                                   | 1.279                                              | 0.708                            | 0.979                                   | 0.622                                               | 0.501                           | 0.418                                       | 0.495                                                  | 0.495                                                  |
| 250–5                                 | 1.696                           | 1.253                                              | 0.270                           | 0.316                            | 0.409                                       | 1.535                             | 1.231                                          | 1.144                                          | 0.644                                            | 0.664                              | 0.808                                                   | 0.808                                     | 1.003                                          | 0.829                                        | 1.473                                                   | 1.319                                              | 0.717                            | 0.976                                   | 0.639                                               | 0.500                           | 0.426                                       | 0.491                                                  | 0.485                                                  |
| 250–6                                 | 1.616                           | 1.243                                              | 0.100                           | 0.296                            | 0.299                                       | 1.525                             | 1.191                                          | 1.074                                          | 0.711                                            | 0.672                              | 0.789                                                   | 0.774                                     | 0.933                                          | 0.822                                        | 1.443                                                   | 1.289                                              | 0.691                            | 0.986                                   | 0.640                                               | 0.490                           | 0.417                                       | 0.489                                                  | 0.484                                                  |
| <b>Mean</b>                           | <b>1.690</b>                    | <b>1.252</b>                                       | <b>0.410</b>                    | <b>0.320</b>                     | <b>0.516</b>                                | <b>1.528</b>                      | <b>1.192</b>                                   | <b>1.095</b>                                   | <b>0.646</b>                                     | <b>0.672</b>                       | <b>0.804</b>                                            | <b>0.803</b>                              | <b>0.985</b>                                   | <b>0.837</b>                                 | <b>1.462</b>                                            | <b>1.289</b>                                       | <b>0.704</b>                     | <b>0.983</b>                            | <b>0.636</b>                                        | <b>0.493</b>                    | <b>0.415</b>                                | <b>0.490</b>                                           | <b>0.482</b>                                           |
| <b>SD</b>                             | <b>0.041</b>                    | <b>0.007</b>                                       | <b>0.276</b>                    | <b>0.016</b>                     | <b>0.201</b>                                | <b>0.011</b>                      | <b>0.022</b>                                   | <b>0.026</b>                                   | <b>0.042</b>                                     | <b>0.009</b>                       | <b>0.012</b>                                            | <b>0.014</b>                              | <b>0.024</b>                                   | <b>0.011</b>                                 | <b>0.009</b>                                            | <b>0.016</b>                                       | <b>0.013</b>                     | <b>0.010</b>                            | <b>0.008</b>                                        | <b>0.008</b>                    | <b>0.009</b>                                | <b>0.010</b>                                           | <b>0.008</b>                                           |
| <b>%RSD</b>                           | <b>2.5</b>                      | <b>0.55</b>                                        | <b>67.4</b>                     | <b>5.2</b>                       | <b>39.0</b>                                 | <b>0.72</b>                       | <b>1.8</b>                                     | <b>2.4</b>                                     | <b>6.4</b>                                       | <b>1.4</b>                         | <b>1.5</b>                                              | <b>1.7</b>                                | <b>2.4</b>                                     | <b>1.3</b>                                   | <b>0.61</b>                                             | <b>1.3</b>                                         | <b>1.9</b>                       | <b>1.0</b>                              | <b>1.3</b>                                          | <b>1.6</b>                      | <b>2.1</b>                                  | <b>2.0</b>                                             | <b>1.6</b>                                             |
| 500–1                                 | 3.316                           | 2.523                                              | 1.250                           | 0.897                            | 1.419                                       | 3.005                             | 3.161                                          | 2.924                                          | 1.941                                            | 2.022                              | 1.582                                                   | 1.585                                     | 1.923                                          | 1.698                                        | 2.993                                                   | 2.539                                              | 1.922                            | 2.015                                   | 1.354                                               | 1.297                           | 1.157                                       | 1.435                                                  | 1.345                                                  |
| 500–2                                 | 3.436                           | 2.523                                              | 1.530                           | 0.947                            | 1.629                                       | 2.945                             | 3.201                                          | 2.924                                          | 1.821                                            | 1.982                              | 1.572                                                   | 1.605                                     | 1.973                                          | 1.738                                        | 2.963                                                   | 2.469                                              | 1.952                            | 2.015                                   | 1.334                                               | 1.337                           | 1.157                                       | 1.405                                                  | 1.395                                                  |
| 500–3                                 | 3.446                           | 2.543                                              | 0.960                           | 0.867                            | 1.229                                       | 3.025                             | 3.201                                          | 2.864                                          | 1.891                                            | 1.922                              | 1.592                                                   | 1.595                                     | 1.933                                          | 1.718                                        | 3.043                                                   | 2.589                                              | 1.952                            | 1.985                                   | 1.324                                               | 1.317                           | 1.157                                       | 1.365                                                  | 1.345                                                  |
| 500–4                                 | 3.426                           | 2.573                                              | 1.180                           | 0.857                            | 1.359                                       | 3.005                             | 3.191                                          | 2.974                                          | 1.961                                            | 1.992                              | 1.572                                                   | 1.605                                     | 1.963                                          | 1.718                                        | 3.003                                                   | 2.549                                              | 1.972                            | 2.015                                   | 1.374                                               | 1.327                           | 1.137                                       | 1.435                                                  | 1.345                                                  |
| 500–5                                 | 3.396                           | 2.553                                              | 1.130                           | 0.817                            | 1.329                                       | 2.995                             | 3.221                                          | 2.914                                          | 1.971                                            | 1.942                              | 1.592                                                   | 1.625                                     | 1.953                                          | 1.718                                        | 3.033                                                   | 2.529                                              | 1.952                            | 2.025                                   | 1.374                                               | 1.327                           | 1.167                                       | 1.375                                                  | 1.385                                                  |
| 500–6                                 | 3.396                           | 2.533                                              | 1.170                           | 0.877                            | 1.379                                       | 2.975                             | 3.221                                          | 2.934                                          | 1.861                                            | 1.982                              | 1.572                                                   | 1.595                                     | 1.923                                          | 1.718                                        | 3.023                                                   | 2.509                                              | 1.962                            | 1.985                                   | 1.334                                               | 1.337                           | 1.187                                       | 1.435                                                  | 1.405                                                  |
| <b>Mean</b>                           | <b>3.403</b>                    | <b>2.542</b>                                       | <b>1.203</b>                    | <b>0.877</b>                     | <b>1.391</b>                                | <b>2.992</b>                      | <b>3.199</b>                                   | <b>2.922</b>                                   | <b>1.908</b>                                     | <b>1.974</b>                       | <b>1.581</b>                                            | <b>1.602</b>                              | <b>1.945</b>                                   | <b>1.718</b>                                 | <b>3.010</b>                                            | <b>2.530</b>                                       | <b>1.952</b>                     | <b>2.007</b>                            | <b>1.349</b>                                        | <b>1.324</b>                    | <b>1.160</b>                                | <b>1.408</b>                                           | <b>1.370</b>                                           |
| <b>SD</b>                             | <b>0.043</b>                    | <b>0.018</b>                                       | <b>0.171</b>                    | <b>0.040</b>                     | <b>0.122</b>                                | <b>0.026</b>                      | <b>0.020</b>                                   | <b>0.032</b>                                   | <b>0.055</b>                                     | <b>0.033</b>                       | <b>0.009</b>                                            | <b>0.012</b>                              | <b>0.020</b>                                   | <b>0.012</b>                                 | <b>0.027</b>                                            | <b>0.037</b>                                       | <b>0.015</b>                     | <b>0.016</b>                            | <b>0.020</b>                                        | <b>0.014</b>                    | <b>0.015</b>                                | <b>0.029</b>                                           | <b>0.026</b>                                           |
| <b>%RSD</b>                           | <b>1.3</b>                      | <b>0.70</b>                                        | <b>14.2</b>                     | <b>4.5</b>                       | <b>8.7</b>                                  | <b>0.86</b>                       | <b>0.64</b>                                    | <b>1.1</b>                                     | <b>2.9</b>                                       | <b>1.7</b>                         | <b>0.57</b>                                             | <b>0.78</b>                               | <b>1.0</b>                                     | <b>0.67</b>                                  | <b>0.89</b>                                             | <b>1.5</b>                                         | <b>0.78</b>                      | <b>0.78</b>                             | <b>1.5</b>                                          | <b>1.0</b>                      | <b>1.3</b>                                  | <b>2.1</b>                                             | <b>1.9</b>                                             |

**Table S16c.** SIFT-MS repeatability data for Mix 1 in 25% DMSO:75% water at three levels (50, 250, and 500).

| Level—Replicate<br>Number; Statistics | Acetone<br>(NO <sup>+</sup> 88) | Acetonitrile<br>(H <sub>3</sub> O <sup>+</sup> 42) | Benzene<br>(NO <sup>+</sup> 78) | Benzene<br>(NO <sup>+</sup> 108) | Benzene<br>(O <sub>2</sub> <sup>+</sup> 78) | 1-Butanol<br>(NO <sup>+</sup> 73) | Chloroform<br>(O <sub>2</sub> <sup>+</sup> 83) | Chloroform<br>(O <sub>2</sub> <sup>+</sup> 85) | Isooctane<br>(H <sub>3</sub> O <sup>+</sup> 113) | Isooctane<br>(NO <sup>+</sup> 113) | Isopropyl alcohol<br>(H <sub>3</sub> O <sup>+</sup> 43) | Isopropyl alcohol<br>(NO <sup>+</sup> 59) | Methanol<br>(H <sub>3</sub> O <sup>+</sup> 33) | Methyl ethyl ketone<br>(NO <sup>+</sup> 102) | Methyl ethyl ketone<br>(O <sub>2</sub> <sup>+</sup> 72) | Nitromethane<br>(H <sub>3</sub> O <sup>+</sup> 62) | Propanal<br>(NO <sup>+</sup> 57) | Tetrahydrofuran<br>(NO <sup>+</sup> 71) | Tetrahydrofuran<br>(O <sub>2</sub> <sup>+</sup> 71) | Toluene<br>(NO <sup>+</sup> 92) | Toluene<br>(O <sub>2</sub> <sup>+</sup> 92) | Trichloroethylene<br>(O <sub>2</sub> <sup>+</sup> 130) | Trichloroethylene<br>(O <sub>2</sub> <sup>+</sup> 132) |
|---------------------------------------|---------------------------------|----------------------------------------------------|---------------------------------|----------------------------------|---------------------------------------------|-----------------------------------|------------------------------------------------|------------------------------------------------|--------------------------------------------------|------------------------------------|---------------------------------------------------------|-------------------------------------------|------------------------------------------------|----------------------------------------------|---------------------------------------------------------|----------------------------------------------------|----------------------------------|-----------------------------------------|-----------------------------------------------------|---------------------------------|---------------------------------------------|--------------------------------------------------------|--------------------------------------------------------|
| 50–1                                  | 0.362                           | 0.259                                              | 0.410                           | 0.096                            | 0.290                                       | 0.262                             | 0.132                                          | 0.137                                          | 0.087                                            | 0.195                              | 0.158                                                   | 0.169                                     | 0.228                                          | 0.165                                        | 0.283                                                   | 0.244                                              | 0.187                            | 0.195                                   | 0.120                                               | 0.060                           | 0.049                                       | 0.069                                                  | 0.061                                                  |
| 50–2                                  | 0.343                           | 0.258                                              | -0.140                          | 0.071                            | -0.100                                      | 0.265                             | 0.157                                          | 0.150                                          | 0.072                                            | 0.196                              | 0.159                                                   | 0.153                                     | 0.212                                          | 0.162                                        | 0.283                                                   | 0.259                                              | 0.204                            | 0.195                                   | 0.123                                               | 0.060                           | 0.052                                       | 0.068                                                  | 0.064                                                  |
| 50–3                                  | 0.368                           | 0.270                                              | 0.100                           | 0.099                            | 0.070                                       | 0.270                             | 0.151                                          | 0.144                                          | 0.089                                            | 0.185                              | 0.160                                                   | 0.167                                     | 0.226                                          | 0.167                                        | 0.297                                                   | 0.255                                              | 0.195                            | 0.205                                   | 0.124                                               | 0.065                           | 0.049                                       | 0.074                                                  | 0.067                                                  |
| 50–4                                  | 0.359                           | 0.256                                              | 0.100                           | 0.102                            | 0.030                                       | 0.259                             | 0.153                                          | 0.139                                          | 0.089                                            | 0.184                              | 0.155                                                   | 0.159                                     | 0.216                                          | 0.163                                        | 0.274                                                   | 0.255                                              | 0.192                            | 0.192                                   | 0.114                                               | 0.061                           | 0.050                                       | 0.069                                                  | 0.067                                                  |
| 50–5                                  | 0.360                           | 0.254                                              | -0.140                          | 0.089                            | -0.060                                      | 0.256                             | 0.151                                          | 0.129                                          | 0.071                                            | 0.193                              | 0.160                                                   | 0.154                                     | 0.216                                          | 0.163                                        | 0.279                                                   | 0.255                                              | 0.194                            | 0.192                                   | 0.116                                               | 0.063                           | 0.048                                       | 0.068                                                  | 0.058                                                  |
| 50–6                                  | 0.374                           | 0.257                                              | 0.040                           | 0.089                            | 0.050                                       | 0.262                             | 0.145                                          | 0.131                                          | 0.077                                            | 0.184                              | 0.169                                                   | 0.164                                     | 0.214                                          | 0.165                                        | 0.276                                                   | 0.245                                              | 0.180                            | 0.194                                   | 0.120                                               | 0.064                           | 0.046                                       | 0.059                                                  | 0.064                                                  |
| <b>Mean</b>                           | <b>0.361</b>                    | <b>0.259</b>                                       | <b>0.047</b>                    | <b>0.091</b>                     | <b>0.047</b>                                | <b>0.262</b>                      | <b>0.148</b>                                   | <b>0.139</b>                                   | <b>0.081</b>                                     | <b>0.189</b>                       | <b>0.160</b>                                            | <b>0.161</b>                              | <b>0.218</b>                                   | <b>0.164</b>                                 | <b>0.282</b>                                            | <b>0.252</b>                                       | <b>0.192</b>                     | <b>0.196</b>                            | <b>0.119</b>                                        | <b>0.062</b>                    | <b>0.049</b>                                | <b>0.068</b>                                           | <b>0.064</b>                                           |
| <b>SD</b>                             | <b>0.0096</b>                   | <b>0.0052</b>                                      | <b>0.1853</b>                   | <b>0.0101</b>                    | <b>0.1245</b>                               | <b>0.0044</b>                     | <b>0.0081</b>                                  | <b>0.0072</b>                                  | <b>0.0078</b>                                    | <b>0.0053</b>                      | <b>0.0043</b>                                           | <b>0.0061</b>                             | <b>0.0061</b>                                  | <b>0.0017</b>                                | <b>0.0075</b>                                           | <b>0.0056</b>                                      | <b>0.0074</b>                    | <b>0.0044</b>                           | <b>0.0035</b>                                       | <b>0.0018</b>                   | <b>0.0020</b>                               | <b>0.0047</b>                                          | <b>0.0034</b>                                          |
| <b>%RSD</b>                           | <b>2.6</b>                      | <b>2.0</b>                                         | <b>397.0</b>                    | <b>11.2</b>                      | <b>266.7</b>                                | <b>1.7</b>                        | <b>5.4</b>                                     | <b>5.2</b>                                     | <b>9.6</b>                                       | <b>2.8</b>                         | <b>2.7</b>                                              | <b>3.8</b>                                | <b>2.8</b>                                     | <b>1.0</b>                                   | <b>2.7</b>                                              | <b>2.2</b>                                         | <b>3.8</b>                       | <b>2.3</b>                              | <b>3.0</b>                                          | <b>2.9</b>                      | <b>4.1</b>                                  | <b>6.9</b>                                             | <b>5.3</b>                                             |
| 250–1                                 | 1.707                           | 1.223                                              | 0.160                           | 0.265                            | 0.290                                       | 1.205                             | 1.045                                          | 0.955                                          | 1.265                                            | 1.240                              | 0.779                                                   | 0.766                                     | 0.992                                          | 0.761                                        | 1.357                                                   | 1.188                                              | 1.230                            | 0.954                                   | 0.612                                               | 0.389                           | 0.327                                       | 0.465                                                  | 0.476                                                  |
| 250–2                                 | 1.777                           | 1.293                                              | 0.510                           | 0.277                            | 0.570                                       | 1.235                             | 1.065                                          | 0.975                                          | 1.175                                            | 1.250                              | 0.807                                                   | 0.786                                     | 1.042                                          | 0.805                                        | 1.407                                                   | 1.228                                              | 1.250                            | 0.975                                   | 0.638                                               | 0.408                           | 0.346                                       | 0.485                                                  | 0.475                                                  |
| 250–3                                 | 1.817                           | 1.273                                              | 0.590                           | 0.304                            | 1.010                                       | 1.265                             | 1.085                                          | 0.975                                          | 1.095                                            | 1.310                              | 0.819                                                   | 0.795                                     | 1.092                                          | 0.798                                        | 1.427                                                   | 1.228                                              | 1.260                            | 0.994                                   | 0.657                                               | 0.413                           | 0.351                                       | 0.477                                                  | 0.479                                                  |
| 250–4                                 | 1.707                           | 1.243                                              | 0.570                           | 0.291                            | 0.540                                       | 1.205                             | 1.025                                          | 0.965                                          | 1.145                                            | 1.260                              | 0.782                                                   | 0.765                                     | 1.052                                          | 0.813                                        | 1.387                                                   | 1.168                                              | 1.250                            | 0.961                                   | 0.638                                               | 0.392                           | 0.334                                       | 0.487                                                  | 0.464                                                  |
| 250–5                                 | 1.797                           | 1.253                                              | 0.570                           | 0.276                            | 0.570                                       | 1.205                             | 1.075                                          | 0.955                                          | 1.305                                            | 1.290                              | 0.785                                                   | 0.776                                     | 1.062                                          | 0.812                                        | 1.387                                                   | 1.198                                              | 1.260                            | 0.972                                   | 0.627                                               | 0.411                           | 0.344                                       | 0.483                                                  | 0.479                                                  |
| 250–6                                 | 1.767                           | 1.263                                              | 0.240                           | 0.220                            | 0.310                                       | 1.215                             | 0.995                                          | 0.925                                          | 1.145                                            | 1.260                              | 0.781                                                   | 0.789                                     | 1.052                                          | 0.811                                        | 1.387                                                   | 1.188                                              | 1.230                            | 0.987                                   | 0.625                                               | 0.394                           | 0.329                                       | 0.469                                                  | 0.437                                                  |
| <b>Mean</b>                           | <b>1.762</b>                    | <b>1.258</b>                                       | <b>0.440</b>                    | <b>0.272</b>                     | <b>0.548</b>                                | <b>1.222</b>                      | <b>1.048</b>                                   | <b>0.959</b>                                   | <b>1.188</b>                                     | <b>1.268</b>                       | <b>0.792</b>                                            | <b>0.780</b>                              | <b>1.048</b>                                   | <b>0.800</b>                                 | <b>1.392</b>                                            | <b>1.200</b>                                       | <b>1.247</b>                     | <b>0.974</b>                            | <b>0.632</b>                                        | <b>0.401</b>                    | <b>0.338</b>                                | <b>0.478</b>                                           | <b>0.468</b>                                           |
| <b>SD</b>                             | <b>0.042</b>                    | <b>0.022</b>                                       | <b>0.173</b>                    | <b>0.026</b>                     | <b>0.237</b>                                | <b>0.022</b>                      | <b>0.031</b>                                   | <b>0.017</b>                                   | <b>0.073</b>                                     | <b>0.024</b>                       | <b>0.015</b>                                            | <b>0.011</b>                              | <b>0.030</b>                                   | <b>0.018</b>                                 | <b>0.021</b>                                            | <b>0.022</b>                                       | <b>0.012</b>                     | <b>0.014</b>                            | <b>0.014</b>                                        | <b>0.010</b>                    | <b>0.009</b>                                | <b>0.008</b>                                           | <b>0.015</b>                                           |
| <b>%RSD</b>                           | <b>2.4</b>                      | <b>1.8</b>                                         | <b>39.3</b>                     | <b>9.7</b>                       | <b>43.3</b>                                 | <b>1.8</b>                        | <b>2.9</b>                                     | <b>1.8</b>                                     | <b>6.2</b>                                       | <b>1.9</b>                         | <b>1.9</b>                                              | <b>1.5</b>                                | <b>2.8</b>                                     | <b>2.3</b>                                   | <b>1.5</b>                                              | <b>1.8</b>                                         | <b>1.0</b>                       | <b>1.4</b>                              | <b>2.2</b>                                          | <b>2.4</b>                      | <b>2.7</b>                                  | <b>1.7</b>                                             | <b>3.2</b>                                             |
| 500–1                                 | 3.647                           | 2.733                                              | 0.710                           | 0.813                            | 1.230                                       | 2.515                             | 2.225                                          | 2.045                                          | 2.275                                            | 2.280                              | 1.701                                                   | 1.655                                     | 2.452                                          | 1.688                                        | 2.857                                                   | 2.478                                              | 2.270                            | 1.984                                   | 1.439                                               | 0.849                           | 0.731                                       | 1.013                                                  | 0.979                                                  |
| 500–2                                 | 3.447                           | 2.483                                              | 0.820                           | 0.549                            | 0.950                                       | 2.445                             | 2.035                                          | 1.885                                          | 2.695                                            | 2.620                              | 1.581                                                   | 1.525                                     | 1.972                                          | 1.558                                        | 2.757                                                   | 2.398                                              | 2.500                            | 1.914                                   | 1.309                                               | 0.781                           | 0.668                                       | 0.958                                                  | 0.949                                                  |
| 500–3                                 | 3.537                           | 2.573                                              | 0.970                           | 0.633                            | 1.060                                       | 2.525                             | 2.045                                          | 1.935                                          | 2.405                                            | 2.510                              | 1.621                                                   | 1.575                                     | 2.102                                          | 1.638                                        | 2.847                                                   | 2.438                                              | 2.430                            | 1.964                                   | 1.349                                               | 0.773                           | 0.680                                       | 0.955                                                  | 0.913                                                  |
| 500–4                                 | 3.417                           | 2.483                                              | 2.910                           | 1.553                            | 2.990                                       | 2.415                             | 1.985                                          | 1.875                                          | 2.495                                            | 2.500                              | 1.561                                                   | 1.505                                     | 2.042                                          | 1.588                                        | 2.737                                                   | 2.358                                              | 2.450                            | 1.894                                   | 1.289                                               | 0.769                           | 0.671                                       | 0.933                                                  | 0.890                                                  |
| 500–5                                 | 3.437                           | 2.483                                              | 1.160                           | 0.653                            | 1.180                                       | 2.435                             | 1.955                                          | 1.855                                          | 2.425                                            | 2.410                              | 1.531                                                   | 1.515                                     | 1.992                                          | 1.568                                        | 2.787                                                   | 2.368                                              | 2.380                            | 1.914                                   | 1.289                                               | 0.772                           | 0.659                                       | 0.925                                                  | 0.899                                                  |
| 500–6                                 | 3.517                           | 2.523                                              | 0.940                           | 0.601                            | 1.060                                       | 2.375                             | 1.975                                          | 1.835                                          | 2.335                                            | 2.460                              | 1.531                                                   | 1.535                                     | 2.052                                          | 1.568                                        | 2.717                                                   | 2.328                                              | 2.410                            | 1.874                                   | 1.249                                               | 0.769                           | 0.654                                       | 0.898                                                  | 0.880                                                  |
| <b>Mean</b>                           | <b>3.501</b>                    | <b>2.546</b>                                       | <b>1.252</b>                    | <b>0.800</b>                     | <b>1.412</b>                                | <b>2.452</b>                      | <b>2.037</b>                                   | <b>1.905</b>                                   | <b>2.438</b>                                     | <b>2.463</b>                       | <b>1.588</b>                                            | <b>1.552</b>                              | <b>2.102</b>                                   | <b>1.601</b>                                 | <b>2.784</b>                                            | <b>2.395</b>                                       | <b>2.407</b>                     | <b>1.924</b>                            | <b>1.320</b>                                        | <b>0.785</b>                    | <b>0.677</b>                                | <b>0.947</b>                                           | <b>0.918</b>                                           |
| <b>SD</b>                             | <b>0.078</b>                    | <b>0.090</b>                                       | <b>0.754</b>                    | <b>0.346</b>                     | <b>0.712</b>                                | <b>0.053</b>                      | <b>0.090</b>                                   | <b>0.070</b>                                   | <b>0.134</b>                                     | <b>0.104</b>                       | <b>0.059</b>                                            | <b>0.051</b>                              | <b>0.162</b>                                   | <b>0.047</b>                                 | <b>0.053</b>                                            | <b>0.051</b>                                       | <b>0.071</b>                     | <b>0.038</b>                            | <b>0.061</b>                                        | <b>0.029</b>                    | <b>0.025</b>                                | <b>0.036</b>                                           | <b>0.035</b>                                           |
| <b>%RSD</b>                           | <b>2.2</b>                      | <b>3.5</b>                                         | <b>60.3</b>                     | <b>43.3</b>                      | <b>50.4</b>                                 | <b>2.2</b>                        | <b>4.4</b>                                     | <b>3.7</b>                                     | <b>5.5</b>                                       | <b>4.2</b>                         | <b>3.7</b>                                              | <b>3.3</b>                                | <b>7.7</b>                                     | <b>2.9</b>                                   | <b>1.9</b>                                              | <b>2.1</b>                                         | <b>3.0</b>                       | <b>2.0</b>                              | <b>4.6</b>                                          | <b>3.7</b>                      | <b>3.8</b>                                  | <b>3.8</b>                                             | <b>3.8</b>                                             |

**Table S17.** SIFT-MS repeatability data for Mix 1 in 5% methanol:95% water at three levels (50, 250, and 500). The replicate shown in red is an outlier and was not included in the calculation. Note that acetonitrile and nitromethane are measured using different product ions compared to other diluent solvents, and that trichloroethylene was not measurable in methanol.

| Level–Replicate<br>Number; Statistics | Acetone<br>(NO <sup>+</sup> 88) | Acetonitrile<br>(NO <sup>+</sup> 71) | Benzene<br>(NO <sup>+</sup> 78) | Benzene<br>(NO <sup>+</sup> 108) | 1-Butanol<br>(NO <sup>+</sup> 73) | Isooctane<br>(NO <sup>+</sup> 113) | Isopropyl alcohol<br>(NO <sup>+</sup> 59) | Methyl ethyl ketone<br>(NO <sup>+</sup> 102) | Nitromethane<br>(NO <sup>+</sup> 91) | Propanal<br>(NO <sup>+</sup> 57) | Tetrahydrofuran<br>(NO <sup>+</sup> 71) | Toluene<br>(NO <sup>+</sup> 92) |
|---------------------------------------|---------------------------------|--------------------------------------|---------------------------------|----------------------------------|-----------------------------------|------------------------------------|-------------------------------------------|----------------------------------------------|--------------------------------------|----------------------------------|-----------------------------------------|---------------------------------|
| 50–1                                  | 0.416                           | 3.705                                | 0.149                           | 0.132                            | 0.087                             | 0.380                              | 0.123                                     | 0.162                                        | 0.534                                | 0.336                            | 0.296                                   | 0.171                           |
| 50–2                                  | 0.393                           | 3.525                                | 0.143                           | 0.136                            | 0.082                             | 0.368                              | 0.122                                     | 0.155                                        | 0.464                                | 0.326                            | 0.282                                   | 0.168                           |
| 50–3                                  | 0.404                           | 3.545                                | 0.145                           | 0.138                            | 0.082                             | 0.366                              | 0.120                                     | 0.160                                        | 0.490                                | 0.331                            | 0.283                                   | 0.169                           |
| 50–4                                  | 0.429                           | 3.845                                | 0.152                           | 0.147                            | 0.096                             | 0.379                              | 0.132                                     | 0.172                                        | 0.529                                | 0.342                            | 0.307                                   | 0.174                           |
| 50–5                                  | 0.404                           | 3.615                                | 0.149                           | 0.144                            | 0.087                             | 0.370                              | 0.120                                     | 0.159                                        | 0.491                                | 0.331                            | 0.289                                   | 0.171                           |
| 50–6                                  | 0.408                           | 3.605                                | 0.144                           | 0.139                            | 0.091                             | 0.372                              | 0.126                                     | 0.159                                        | 0.497                                | 0.335                            | 0.288                                   | 0.168                           |
| <b>Mean</b>                           | <b>0.409</b>                    | <b>3.640</b>                         | <b>0.147</b>                    | <b>0.140</b>                     | <b>0.087</b>                      | <b>0.372</b>                       | <b>0.124</b>                              | <b>0.161</b>                                 | <b>0.500</b>                         | <b>0.334</b>                     | <b>0.291</b>                            | <b>0.170</b>                    |
| <b>SD</b>                             | <b>0.011</b>                    | <b>0.108</b>                         | <b>0.003</b>                    | <b>0.005</b>                     | <b>0.005</b>                      | <b>0.005</b>                       | <b>0.004</b>                              | <b>0.005</b>                                 | <b>0.024</b>                         | <b>0.005</b>                     | <b>0.009</b>                            | <b>0.002</b>                    |
| <b>%RSD</b>                           | <b>2.7</b>                      | <b>3.0</b>                           | <b>2.2</b>                      | <b>3.6</b>                       | <b>5.6</b>                        | <b>1.4</b>                         | <b>3.4</b>                                | <b>3.3</b>                                   | <b>4.8</b>                           | <b>1.5</b>                       | <b>2.9</b>                              | <b>1.2</b>                      |
| 250–1                                 | 2.030                           | 18.255                               | 0.725                           | 0.636                            | 0.497                             | 1.717                              | 0.622                                     | 0.828                                        | 2.566                                | 1.534                            | 1.454                                   | 0.786                           |
| 250–2                                 | 2.040                           | 18.155                               | 0.728                           | 0.641                            | 0.498                             | 1.667                              | 0.606                                     | 0.840                                        | 2.536                                | 1.514                            | 1.454                                   | 0.776                           |
| 250–3                                 | 2.060                           | 18.455                               | 0.737                           | 0.661                            | 0.503                             | 1.687                              | 0.616                                     | 0.853                                        | 2.536                                | 1.534                            | 1.474                                   | 0.787                           |
| 250–4                                 | 2.010                           | 17.655                               | 0.716                           | 0.647                            | 0.483                             | 1.747                              | 0.608                                     | 0.819                                        | 2.596                                | 1.564                            | 1.414                                   | 0.767                           |
| 250–5                                 | 2.000                           | 17.655                               | 0.698                           | 0.625                            | 0.485                             | 1.667                              | 0.595                                     | 0.816                                        | 2.396                                | 1.494                            | 1.414                                   | 0.750                           |
| 250–6                                 | 1.920                           | 17.255                               | 0.692                           | 0.604                            | 0.477                             | 1.717                              | 0.573                                     | 0.789                                        | 2.236                                | 1.564                            | 1.384                                   | 0.739                           |
| <b>Mean</b>                           | <b>2.010</b>                    | <b>17.905</b>                        | <b>0.716</b>                    | <b>0.636</b>                     | <b>0.490</b>                      | <b>1.700</b>                       | <b>0.604</b>                              | <b>0.824</b>                                 | <b>2.477</b>                         | <b>1.534</b>                     | <b>1.433</b>                            | <b>0.767</b>                    |
| <b>SD</b>                             | <b>0.045</b>                    | <b>0.415</b>                         | <b>0.016</b>                    | <b>0.018</b>                     | <b>0.009</b>                      | <b>0.029</b>                       | <b>0.016</b>                              | <b>0.020</b>                                 | <b>0.125</b>                         | <b>0.025</b>                     | <b>0.031</b>                            | <b>0.018</b>                    |
| <b>%RSD</b>                           | <b>2.2</b>                      | <b>2.3</b>                           | <b>2.3</b>                      | <b>2.8</b>                       | <b>1.9</b>                        | <b>1.7</b>                         | <b>2.6</b>                                | <b>2.4</b>                                   | <b>5.0</b>                           | <b>1.6</b>                       | <b>2.1</b>                              | <b>2.3</b>                      |
| 500–1                                 | 3.980                           | 35.955                               | 1.488                           | 1.365                            | 1.030                             | 3.567                              | 1.233                                     | 1.662                                        | 4.806                                | 3.194                            | 2.884                                   | 1.617                           |
| 500–2                                 | 3.200                           | 27.855                               | 2.368                           | 1.325                            | 0.776                             | 2.807                              | 0.939                                     | 1.312                                        | 3.506                                | 2.604                            | 2.224                                   | 1.287                           |
| 500–3                                 | 3.920                           | 35.855                               | 2.158                           | 1.405                            | 1.010                             | 3.547                              | 1.213                                     | 1.672                                        | 4.716                                | 3.204                            | 2.864                                   | 1.607                           |
| 500–4                                 | 3.980                           | 35.755                               | 1.808                           | 1.365                            | 1.010                             | 3.427                              | 1.213                                     | 1.652                                        | 4.846                                | 3.124                            | 2.864                                   | 1.587                           |
| 500–5                                 | 3.960                           | 35.255                               | 1.658                           | 1.325                            | 1.010                             | 3.547                              | 1.193                                     | 1.662                                        | 4.446                                | 3.174                            | 2.824                                   | 1.597                           |
| 500–6                                 | 3.810                           | 34.755                               | 1.598                           | 1.325                            | 1.000                             | 3.507                              | 1.173                                     | 1.612                                        | 4.376                                | 3.204                            | 2.784                                   | 1.587                           |
| <b>Mean</b>                           | <b>3.930</b>                    | <b>35.515</b>                        | <b>1.742</b>                    | <b>1.357</b>                     | <b>1.012</b>                      | <b>3.519</b>                       | <b>1.205</b>                              | <b>1.652</b>                                 | <b>4.638</b>                         | <b>3.180</b>                     | <b>2.844</b>                            | <b>1.599</b>                    |
| <b>SD</b>                             | <b>0.064</b>                    | <b>0.450</b>                         | <b>0.232</b>                    | <b>0.030</b>                     | <b>0.010</b>                      | <b>0.050</b>                       | <b>0.020</b>                              | <b>0.021</b>                                 | <b>0.191</b>                         | <b>0.030</b>                     | <b>0.036</b>                            | <b>0.012</b>                    |
| <b>%RSD</b>                           | <b>1.6</b>                      | <b>1.3</b>                           | <b>13.3</b>                     | <b>2.2</b>                       | <b>1.0</b>                        | <b>1.4</b>                         | <b>1.7</b>                                | <b>1.3</b>                                   | <b>4.1</b>                           | <b>0.95</b>                      | <b>1.3</b>                              | <b>0.73</b>                     |

**Table S18.** SIFT-MS repeatability data for Mix 1 in 5% triacetin:95% water at three levels (50, 250, and 500).

| Level—Replicate<br>Number; Statistics | Acetone<br>(NO <sup>+</sup> 88) | Acetonitrile<br>(H <sub>3</sub> O <sup>+</sup> 42) | Benzene<br>(NO <sup>+</sup> 78) | Benzene<br>(NO <sup>+</sup> 108) | Benzene<br>(O <sub>2</sub> <sup>+</sup> 78) | 1-Butanol<br>(NO <sup>+</sup> 73) | Chloroform<br>(O <sub>2</sub> <sup>+</sup> 83) | Chloroform<br>(O <sub>2</sub> <sup>+</sup> 85) | Isooctane<br>(H <sub>3</sub> O <sup>+</sup> 113) | Isooctane<br>(NO <sup>+</sup> 113) | Isopropyl alcohol<br>(H <sub>3</sub> O <sup>+</sup> 43) | Isopropyl alcohol<br>(NO <sup>+</sup> 59) | Methanol<br>(H <sub>3</sub> O <sup>+</sup> 33) | Methyl ethyl ketone<br>(NO <sup>+</sup> 102) | Methyl ethyl ketone<br>(O <sub>2</sub> <sup>+</sup> 72) | Nitromethane<br>(H <sub>3</sub> O <sup>+</sup> 62) | Propanal<br>(NO <sup>+</sup> 57) | Tetrahydrofuran<br>(NO <sup>+</sup> 71) | Tetrahydrofuran<br>(O <sub>2</sub> <sup>+</sup> 71) | Toluene<br>(NO <sup>+</sup> 92) | Toluene<br>(O <sub>2</sub> <sup>+</sup> 92) | Trichloroethylene<br>(O <sub>2</sub> <sup>+</sup> 130) | Trichloroethylene<br>(O <sub>2</sub> <sup>+</sup> 132) |
|---------------------------------------|---------------------------------|----------------------------------------------------|---------------------------------|----------------------------------|---------------------------------------------|-----------------------------------|------------------------------------------------|------------------------------------------------|--------------------------------------------------|------------------------------------|---------------------------------------------------------|-------------------------------------------|------------------------------------------------|----------------------------------------------|---------------------------------------------------------|----------------------------------------------------|----------------------------------|-----------------------------------------|-----------------------------------------------------|---------------------------------|---------------------------------------------|--------------------------------------------------------|--------------------------------------------------------|
| 50–1                                  | 0.317                           | 0.280                                              | 0.149                           | 0.103                            | 0.154                                       | 0.269                             | 0.372                                          | 0.338                                          | 0.210                                            | 0.298                              | 0.194                                                   | 0.161                                     | 0.229                                          | 0.165                                        | 0.259                                                   | 0.265                                              | 0.257                            | 0.269                                   | 0.169                                               | 0.158                           | 0.130                                       | 0.157                                                  | 0.166                                                  |
| 50–2                                  | 0.346                           | 0.292                                              | 0.158                           | 0.099                            | 0.160                                       | 0.273                             | 0.395                                          | 0.357                                          | 0.260                                            | 0.301                              | 0.200                                                   | 0.160                                     | 0.234                                          | 0.170                                        | 0.270                                                   | 0.277                                              | 0.267                            | 0.274                                   | 0.167                                               | 0.167                           | 0.135                                       | 0.178                                                  | 0.171                                                  |
| 50–3                                  | 0.315                           | 0.275                                              | 0.158                           | 0.101                            | 0.160                                       | 0.260                             | 0.372                                          | 0.336                                          | 0.261                                            | 0.290                              | 0.193                                                   | 0.154                                     | 0.226                                          | 0.163                                        | 0.264                                                   | 0.267                                              | 0.260                            | 0.260                                   | 0.171                                               | 0.152                           | 0.130                                       | 0.168                                                  | 0.163                                                  |
| 50–4                                  | 0.332                           | 0.284                                              | 0.156                           | 0.114                            | 0.165                                       | 0.274                             | 0.382                                          | 0.346                                          | 0.269                                            | 0.294                              | 0.196                                                   | 0.160                                     | 0.246                                          | 0.170                                        | 0.268                                                   | 0.266                                              | 0.253                            | 0.269                                   | 0.175                                               | 0.158                           | 0.137                                       | 0.173                                                  | 0.170                                                  |
| 50–5                                  | 0.311                           | 0.279                                              | 0.148                           | 0.099                            | 0.159                                       | 0.264                             | 0.373                                          | 0.346                                          | 0.215                                            | 0.294                              | 0.199                                                   | 0.156                                     | 0.222                                          | 0.165                                        | 0.269                                                   | 0.265                                              | 0.260                            | 0.263                                   | 0.164                                               | 0.147                           | 0.132                                       | 0.161                                                  | 0.160                                                  |
| 50–6                                  | 0.315                           | 0.280                                              | 0.161                           | 0.096                            | 0.163                                       | 0.270                             | 0.390                                          | 0.333                                          | 0.233                                            | 0.291                              | 0.202                                                   | 0.155                                     | 0.213                                          | 0.158                                        | 0.273                                                   | 0.285                                              | 0.262                            | 0.264                                   | 0.171                                               | 0.148                           | 0.131                                       | 0.160                                                  | 0.161                                                  |
| <b>Mean</b>                           | <b>0.323</b>                    | <b>0.281</b>                                       | <b>0.155</b>                    | <b>0.102</b>                     | <b>0.161</b>                                | <b>0.268</b>                      | <b>0.380</b>                                   | <b>0.343</b>                                   | <b>0.241</b>                                     | <b>0.295</b>                       | <b>0.198</b>                                            | <b>0.157</b>                              | <b>0.229</b>                                   | <b>0.165</b>                                 | <b>0.267</b>                                            | <b>0.271</b>                                       | <b>0.260</b>                     | <b>0.266</b>                            | <b>0.170</b>                                        | <b>0.155</b>                    | <b>0.132</b>                                | <b>0.166</b>                                           | <b>0.165</b>                                           |
| <b>SD</b>                             | <b>0.0124</b>                   | <b>0.0053</b>                                      | <b>0.0048</b>                   | <b>0.0058</b>                    | <b>0.0034</b>                               | <b>0.0049</b>                     | <b>0.0092</b>                                  | <b>0.0080</b>                                  | <b>0.0233</b>                                    | <b>0.0038</b>                      | <b>0.0032</b>                                           | <b>0.0027</b>                             | <b>0.0102</b>                                  | <b>0.0041</b>                                | <b>0.0045</b>                                           | <b>0.0076</b>                                      | <b>0.0043</b>                    | <b>0.0046</b>                           | <b>0.0035</b>                                       | <b>0.0069</b>                   | <b>0.0026</b>                               | <b>0.0075</b>                                          | <b>0.0042</b>                                          |
| <b>%RSD</b>                           | <b>3.8</b>                      | <b>1.9</b>                                         | <b>3.1</b>                      | <b>5.6</b>                       | <b>2.1</b>                                  | <b>1.8</b>                        | <b>2.4</b>                                     | <b>2.3</b>                                     | <b>9.6</b>                                       | <b>1.3</b>                         | <b>1.6</b>                                              | <b>1.7</b>                                | <b>4.5</b>                                     | <b>2.5</b>                                   | <b>1.7</b>                                              | <b>2.8</b>                                         | <b>1.7</b>                       | <b>1.7</b>                              | <b>2.0</b>                                          | <b>4.4</b>                      | <b>2.0</b>                                  | <b>4.5</b>                                             | <b>2.6</b>                                             |
| 250–1                                 | 1.579                           | 1.428                                              | 0.738                           | 0.492                            | 0.781                                       | 1.327                             | 1.784                                          | 1.609                                          | 1.516                                            | 1.377                              | 0.954                                                   | 0.764                                     | 1.175                                          | 0.822                                        | 1.354                                                   | 1.239                                              | 1.228                            | 1.319                                   | 0.868                                               | 0.735                           | 0.615                                       | 0.782                                                  | 0.738                                                  |
| 250–2                                 | 1.619                           | 1.408                                              | 0.729                           | 0.484                            | 0.734                                       | 1.287                             | 1.744                                          | 1.569                                          | 1.466                                            | 1.387                              | 0.925                                                   | 0.762                                     | 1.135                                          | 0.808                                        | 1.294                                                   | 1.259                                              | 1.238                            | 1.289                                   | 0.844                                               | 0.721                           | 0.624                                       | 0.791                                                  | 0.758                                                  |
| 250–3                                 | 1.589                           | 1.378                                              | 0.785                           | 0.485                            | 0.789                                       | 1.267                             | 1.724                                          | 1.589                                          | 1.466                                            | 1.377                              | 0.919                                                   | 0.759                                     | 1.135                                          | 0.794                                        | 1.294                                                   | 1.209                                              | 1.208                            | 1.289                                   | 0.835                                               | 0.696                           | 0.606                                       | 0.784                                                  | 0.747                                                  |
| 250–4                                 | 1.609                           | 1.418                                              | 0.780                           | 0.499                            | 0.809                                       | 1.287                             | 1.744                                          | 1.599                                          | 1.436                                            | 1.417                              | 0.960                                                   | 0.768                                     | 1.155                                          | 0.811                                        | 1.294                                                   | 1.259                                              | 1.218                            | 1.289                                   | 0.859                                               | 0.734                           | 0.619                                       | 0.759                                                  | 0.783                                                  |
| 250–5                                 | 1.719                           | 1.478                                              | 0.802                           | 0.505                            | 0.816                                       | 1.337                             | 1.774                                          | 1.629                                          | 1.346                                            | 1.377                              | 0.965                                                   | 0.798                                     | 1.245                                          | 0.856                                        | 1.334                                                   | 1.269                                              | 1.208                            | 1.349                                   | 0.883                                               | 0.737                           | 0.641                                       | 0.772                                                  | 0.768                                                  |
| 250–6                                 | 1.579                           | 1.388                                              | 0.847                           | 0.465                            | 0.816                                       | 1.267                             | 1.694                                          | 1.549                                          | 1.376                                            | 1.377                              | 0.930                                                   | 0.748                                     | 1.155                                          | 0.785                                        | 1.254                                                   | 1.249                                              | 1.228                            | 1.269                                   | 0.837                                               | 0.711                           | 0.612                                       | 0.769                                                  | 0.742                                                  |
| <b>Mean</b>                           | <b>1.616</b>                    | <b>1.416</b>                                       | <b>0.780</b>                    | <b>0.488</b>                     | <b>0.791</b>                                | <b>1.295</b>                      | <b>1.744</b>                                   | <b>1.591</b>                                   | <b>1.434</b>                                     | <b>1.385</b>                       | <b>0.943</b>                                            | <b>0.766</b>                              | <b>1.167</b>                                   | <b>0.812</b>                                 | <b>1.304</b>                                            | <b>1.248</b>                                       | <b>1.221</b>                     | <b>1.300</b>                            | <b>0.854</b>                                        | <b>0.722</b>                    | <b>0.619</b>                                | <b>0.776</b>                                           | <b>0.756</b>                                           |
| <b>SD</b>                             | <b>0.049</b>                    | <b>0.032</b>                                       | <b>0.040</b>                    | <b>0.013</b>                     | <b>0.029</b>                                | <b>0.027</b>                      | <b>0.030</b>                                   | <b>0.026</b>                                   | <b>0.058</b>                                     | <b>0.015</b>                       | <b>0.018</b>                                            | <b>0.015</b>                              | <b>0.038</b>                                   | <b>0.023</b>                                 | <b>0.032</b>                                            | <b>0.020</b>                                       | <b>0.011</b>                     | <b>0.026</b>                            | <b>0.017</b>                                        | <b>0.015</b>                    | <b>0.011</b>                                | <b>0.011</b>                                           | <b>0.016</b>                                           |
| <b>%RSD</b>                           | <b>3.0</b>                      | <b>2.3</b>                                         | <b>5.1</b>                      | <b>2.6</b>                       | <b>3.6</b>                                  | <b>2.1</b>                        | <b>1.7</b>                                     | <b>1.6</b>                                     | <b>4.0</b>                                       | <b>1.1</b>                         | <b>1.9</b>                                              | <b>2.0</b>                                | <b>3.2</b>                                     | <b>2.8</b>                                   | <b>2.5</b>                                              | <b>1.6</b>                                         | <b>0.91</b>                      | <b>2.0</b>                              | <b>2.0</b>                                          | <b>2.1</b>                      | <b>1.8</b>                                  | <b>1.4</b>                                             | <b>2.1</b>                                             |
| 500–1                                 | 3.239                           | 2.938                                              | 1.716                           | 1.049                            | 1.766                                       | 2.627                             | 3.654                                          | 3.439                                          | 3.226                                            | 2.897                              | 1.934                                                   | 1.558                                     | 2.335                                          | 1.650                                        | 2.724                                                   | 2.599                                              | 2.508                            | 2.659                                   | 1.834                                               | 1.547                           | 1.387                                       | 1.719                                                  | 1.667                                                  |
| 500–2                                 | 3.219                           | 2.868                                              | 1.676                           | 1.029                            | 1.706                                       | 2.527                             | 3.634                                          | 3.269                                          | 3.106                                            | 2.867                              | 1.874                                                   | 1.518                                     | 2.305                                          | 1.600                                        | 2.674                                                   | 2.529                                              | 2.518                            | 2.579                                   | 1.764                                               | 1.507                           | 1.327                                       | 1.689                                                  | 1.647                                                  |
| 500–3                                 | 3.259                           | 2.858                                              | 1.606                           | 1.029                            | 1.716                                       | 2.547                             | 3.594                                          | 3.369                                          | 3.016                                            | 2.827                              | 1.894                                                   | 1.518                                     | 2.325                                          | 1.620                                        | 2.634                                                   | 2.509                                              | 2.538                            | 2.609                                   | 1.764                                               | 1.497                           | 1.347                                       | 1.619                                                  | 1.617                                                  |
| 500–4                                 | 3.119                           | 2.808                                              | 1.596                           | 0.999                            | 1.676                                       | 2.537                             | 3.634                                          | 3.269                                          | 3.136                                            | 2.887                              | 1.904                                                   | 1.488                                     | 2.195                                          | 1.580                                        | 2.614                                                   | 2.559                                              | 2.478                            | 2.579                                   | 1.744                                               | 1.457                           | 1.337                                       | 1.649                                                  | 1.627                                                  |
| 500–5                                 | 3.169                           | 2.818                                              | 1.636                           | 1.049                            | 1.686                                       | 2.537                             | 3.594                                          | 3.269                                          | 3.136                                            | 2.767                              | 1.854                                                   | 1.478                                     | 2.175                                          | 1.560                                        | 2.614                                                   | 2.569                                              | 2.508                            | 2.559                                   | 1.754                                               | 1.487                           | 1.327                                       | 1.639                                                  | 1.617                                                  |
| 500–6                                 | 3.259                           | 2.628                                              | 1.626                           | 1.069                            | 1.726                                       | 2.497                             | 3.604                                          | 3.299                                          | 2.876                                            | 2.817                              | 1.664                                                   | 1.378                                     | 2.115                                          | 1.600                                        | 2.614                                                   | 2.199                                              | 2.318                            | 2.529                                   | 1.774                                               | 1.497                           | 1.347                                       | 1.649                                                  | 1.637                                                  |
| <b>Mean</b>                           | <b>3.211</b>                    | <b>2.819</b>                                       | <b>1.642</b>                    | <b>1.037</b>                     | <b>1.713</b>                                | <b>2.545</b>                      | <b>3.619</b>                                   | <b>3.319</b>                                   | <b>3.083</b>                                     | <b>2.844</b>                       | <b>1.854</b>                                            | <b>1.489</b>                              | <b>2.242</b>                                   | <b>1.601</b>                                 | <b>2.646</b>                                            | <b>2.494</b>                                       | <b>2.478</b>                     | <b>2.585</b>                            | <b>1.772</b>                                        | <b>1.498</b>                    | <b>1.345</b>                                | <b>1.660</b>                                           | <b>1.635</b>                                           |
| <b>SD</b>                             | <b>0.051</b>                    | <b>0.095</b>                                       | <b>0.041</b>                    | <b>0.022</b>                     | <b>0.029</b>                                | <b>0.040</b>                      | <b>0.023</b>                                   | <b>0.064</b>                                   | <b>0.111</b>                                     | <b>0.045</b>                       | <b>0.089</b>                                            | <b>0.056</b>                              | <b>0.084</b>                                   | <b>0.029</b>                                 | <b>0.041</b>                                            | <b>0.135</b>                                       | <b>0.074</b>                     | <b>0.041</b>                            | <b>0.029</b>                                        | <b>0.027</b>                    | <b>0.020</b>                                | <b>0.033</b>                                           | <b>0.018</b>                                           |
| <b>%RSD</b>                           | <b>1.6</b>                      | <b>3.4</b>                                         | <b>2.5</b>                      | <b>2.1</b>                       | <b>1.7</b>                                  | <b>1.6</b>                        | <b>0.63</b>                                    | <b>1.9</b>                                     | <b>3.6</b>                                       | <b>1.6</b>                         | <b>4.8</b>                                              | <b>3.8</b>                                | <b>3.7</b>                                     | <b>1.8</b>                                   | <b>1.5</b>                                              | <b>5.4</b>                                         | <b>3.0</b>                       | <b>1.6</b>                              | <b>1.6</b>                                          | <b>1.8</b>                      | <b>1.5</b>                                  | <b>2.0</b>                                             | <b>1.1</b>                                             |

## D. Limit of Quantitation (LOQ)

**Table S19.** SIFT-MS LOQ data for Mix 1 in water at three levels (1, 2, and 5).

| Level—Replicate<br>Number; Statistics | Acetone<br>(NO <sup>+</sup> 88) | Acetonitrile<br>(H <sub>3</sub> O <sup>+</sup> 42) | Benzene<br>(NO <sup>+</sup> 78) | Benzene<br>(NO <sup>+</sup> 108) | Benzene<br>(O <sub>2</sub> <sup>+</sup> 78) | 1-Butanol<br>(NO <sup>+</sup> 73) | Chloroform<br>(O <sub>2</sub> <sup>+</sup> 83) | Chloroform<br>(O <sub>2</sub> <sup>+</sup> 85) | Isooctane<br>(H <sub>3</sub> O <sup>+</sup> 113) | Isooctane<br>(NO <sup>+</sup> 113) | Isopropyl alcohol<br>(H <sub>3</sub> O <sup>+</sup> 43) | Isopropyl alcohol<br>(NO <sup>+</sup> 59) | Methanol<br>(H <sub>3</sub> O <sup>+</sup> 33) | Methyl ethyl ketone<br>(NO <sup>+</sup> 102) | Methyl ethyl ketone<br>(O <sub>2</sub> <sup>+</sup> 72) | Nitromethane<br>(H <sub>3</sub> O <sup>+</sup> 62) | Propanal<br>(NO <sup>+</sup> 57) | Tetrahydrofuran<br>(NO <sup>+</sup> 71) | Tetrahydrofuran<br>(O <sub>2</sub> <sup>+</sup> 71) | Toluene<br>(NO <sup>+</sup> 92) | Toluene<br>(O <sub>2</sub> <sup>+</sup> 92) | Trichloroethylene<br>(O <sub>2</sub> <sup>+</sup> 130) | Trichloroethylene<br>(O <sub>2</sub> <sup>+</sup> 132) |
|---------------------------------------|---------------------------------|----------------------------------------------------|---------------------------------|----------------------------------|---------------------------------------------|-----------------------------------|------------------------------------------------|------------------------------------------------|--------------------------------------------------|------------------------------------|---------------------------------------------------------|-------------------------------------------|------------------------------------------------|----------------------------------------------|---------------------------------------------------------|----------------------------------------------------|----------------------------------|-----------------------------------------|-----------------------------------------------------|---------------------------------|---------------------------------------------|--------------------------------------------------------|--------------------------------------------------------|
| 1–1                                   | 7.9                             | 5.1                                                | 2.3                             | 1.4                              | 1.9                                         | 6.0                               | 4.7                                            | 6.8                                            | 23.1                                             | 2.7                                | 3.7                                                     | 3.6                                       | 4.4                                            | 3.0                                          | 4.7                                                     | 4.0                                                | 3.5                              | 5.7                                     | 4.3                                                 | 2.6                             | 1.6                                         | 1.2                                                    | 1.7                                                    |
| 1–2                                   | 7.1                             | 4.3                                                | 2.0                             | 0.5                              | 2.1                                         | 6.2                               | 5.3                                            | 6.9                                            | 20.1                                             | 4.9                                | 3.6                                                     | 3.3                                       | 4.3                                            | 3.5                                          | 4.8                                                     | 4.2                                                | 3.4                              | 6.2                                     | 3.8                                                 | 2.3                             | 2.0                                         | 2.0                                                    | 3.4                                                    |
| 1–3                                   | 6.2                             | 4.7                                                | 1.8                             | 0.9                              | 2.1                                         | 5.9                               | 5.4                                            | 8.1                                            | 22.1                                             | 3.0                                | 4.1                                                     | 3.8                                       | 4.8                                            | 3.4                                          | 5.8                                                     | 4.4                                                | 3.2                              | 5.6                                     | 4.6                                                 | 2.5                             | 2.1                                         | 2.4                                                    | 3.1                                                    |
| <b>Mean</b>                           | <b>7.1</b>                      | <b>4.7</b>                                         | <b>2.0</b>                      | <b>1.0</b>                       | <b>2.0</b>                                  | <b>6.1</b>                        | <b>5.1</b>                                     | <b>7.3</b>                                     | <b>21.8</b>                                      | <b>3.5</b>                         | <b>3.8</b>                                              | <b>3.6</b>                                | <b>4.5</b>                                     | <b>3.3</b>                                   | <b>5.1</b>                                              | <b>4.2</b>                                         | <b>3.3</b>                       | <b>5.8</b>                              | <b>4.2</b>                                          | <b>2.5</b>                      | <b>1.9</b>                                  | <b>1.9</b>                                             | <b>2.7</b>                                             |
| <b>SD</b>                             | <b>0.67</b>                     | <b>0.33</b>                                        | <b>0.20</b>                     | <b>0.37</b>                      | <b>0.08</b>                                 | <b>0.12</b>                       | <b>0.31</b>                                    | <b>0.59</b>                                    | <b>1.25</b>                                      | <b>1.00</b>                        | <b>0.23</b>                                             | <b>0.17</b>                               | <b>0.19</b>                                    | <b>0.20</b>                                  | <b>0.50</b>                                             | <b>0.18</b>                                        | <b>0.10</b>                      | <b>0.26</b>                             | <b>0.34</b>                                         | <b>0.14</b>                     | <b>0.21</b>                                 | <b>0.48</b>                                            | <b>0.72</b>                                            |
| <b>%RSD</b>                           | <b>9.4</b>                      | <b>7.0</b>                                         | <b>9.8</b>                      | <b>38.6</b>                      | <b>4.1</b>                                  | <b>2.0</b>                        | <b>6.0</b>                                     | <b>8.1</b>                                     | <b>5.7</b>                                       | <b>28.2</b>                        | <b>6.0</b>                                              | <b>4.9</b>                                | <b>4.2</b>                                     | <b>6.1</b>                                   | <b>9.8</b>                                              | <b>4.3</b>                                         | <b>3.1</b>                       | <b>4.5</b>                              | <b>8.1</b>                                          | <b>5.9</b>                      | <b>11.0</b>                                 | <b>25.6</b>                                            | <b>26.3</b>                                            |
| 2–1                                   | 16.6                            | 9.0                                                | 4.0                             | 3.0                              | 3.9                                         | 12.8                              | 10.4                                           | 13.0                                           | 6.2                                              | 6.9                                | 7.5                                                     | 7.5                                       | 7.8                                            | 6.8                                          | 9.9                                                     | 9.2                                                | 8.3                              | 11.2                                    | 8.7                                                 | 5.1                             | 4.8                                         | 4.7                                                    | 5.5                                                    |
| 2–2                                   | 14.9                            | 10.0                                               | 4.6                             | 2.7                              | 4.1                                         | 12.0                              | 11.6                                           | 14.4                                           | 5.9                                              | 8.4                                | 8.1                                                     | 6.4                                       | 9.3                                            | 6.9                                          | 10.3                                                    | 9.8                                                | 8.1                              | 11.4                                    | 8.6                                                 | 5.4                             | 4.0                                         | 5.7                                                    | 6.0                                                    |
| 2–3                                   | 15.2                            | 10.0                                               | 4.5                             | 2.7                              | 3.8                                         | 13.1                              | 11.4                                           | 12.4                                           | 6.0                                              | 7.6                                | 7.7                                                     | 6.3                                       | 7.8                                            | 6.1                                          | 10.1                                                    | 8.8                                                | 7.3                              | 11.5                                    | 7.5                                                 | 5.2                             | 4.1                                         | 4.8                                                    | 4.8                                                    |
| <b>Mean</b>                           | <b>15.5</b>                     | <b>9.6</b>                                         | <b>4.4</b>                      | <b>2.8</b>                       | <b>3.9</b>                                  | <b>12.6</b>                       | <b>11.1</b>                                    | <b>13.3</b>                                    | <b>6.0</b>                                       | <b>7.7</b>                         | <b>7.7</b>                                              | <b>6.7</b>                                | <b>8.3</b>                                     | <b>6.6</b>                                   | <b>10.1</b>                                             | <b>9.2</b>                                         | <b>7.9</b>                       | <b>11.4</b>                             | <b>8.2</b>                                          | <b>5.2</b>                      | <b>4.3</b>                                  | <b>5.1</b>                                             | <b>5.4</b>                                             |
| <b>SD</b>                             | <b>0.74</b>                     | <b>0.47</b>                                        | <b>0.28</b>                     | <b>0.17</b>                      | <b>0.12</b>                                 | <b>0.46</b>                       | <b>0.52</b>                                    | <b>0.84</b>                                    | <b>0.12</b>                                      | <b>0.61</b>                        | <b>0.25</b>                                             | <b>0.54</b>                               | <b>0.71</b>                                    | <b>0.37</b>                                  | <b>0.16</b>                                             | <b>0.42</b>                                        | <b>0.44</b>                      | <b>0.12</b>                             | <b>0.56</b>                                         | <b>0.11</b>                     | <b>0.35</b>                                 | <b>0.42</b>                                            | <b>0.48</b>                                            |
| <b>%RSD</b>                           | <b>4.8</b>                      | <b>4.9</b>                                         | <b>6.4</b>                      | <b>6.0</b>                       | <b>3.1</b>                                  | <b>3.7</b>                        | <b>4.7</b>                                     | <b>6.3</b>                                     | <b>2.1</b>                                       | <b>8.0</b>                         | <b>3.2</b>                                              | <b>8.1</b>                                | <b>8.5</b>                                     | <b>5.5</b>                                   | <b>1.6</b>                                              | <b>4.6</b>                                         | <b>5.5</b>                       | <b>1.1</b>                              | <b>6.8</b>                                          | <b>2.2</b>                      | <b>8.3</b>                                  | <b>8.4</b>                                             | <b>8.9</b>                                             |
| 5–1                                   | 34.2                            | 25.4                                               | 9.0                             | 5.5                              | 11.7                                        | 31.4                              | 34.3                                           | 29.9                                           | 34.1                                             | 22.7                               | 16.3                                                    | 17.1                                      | 20.6                                           | 16.6                                         | 27.3                                                    | 23.0                                               | 20.1                             | 28.2                                    | 20.9                                                | 12.5                            | 9.9                                         | 10.6                                                   | 12.4                                                   |
| 5–2                                   | 35.1                            | 24.8                                               | 10.7                            | 6.6                              | 12.2                                        | 32.4                              | 31.1                                           | 28.5                                           | 41.1                                             | 21.3                               | 17.0                                                    | 16.2                                      | 21.2                                           | 17.3                                         | 28.8                                                    | 24.2                                               | 23.0                             | 31.3                                    | 20.0                                                | 12.5                            | 12.0                                        | 12.6                                                   | 13.2                                                   |
| 5–3                                   | 32.6                            | 26.4                                               | 10.3                            | 8.2                              | 10.8                                        | 32.2                              | 34.6                                           | 34.7                                           | 38.1                                             | 24.9                               | 19.5                                                    | 16.8                                      | 22.7                                           | 16.7                                         | 26.4                                                    | 24.7                                               | 20.4                             | 31.2                                    | 19.9                                                | 12.0                            | 10.0                                        | 11.5                                                   | 13.0                                                   |
| <b>Mean</b>                           | <b>33.9</b>                     | <b>25.5</b>                                        | <b>10.0</b>                     | <b>6.7</b>                       | <b>11.5</b>                                 | <b>32.0</b>                       | <b>33.3</b>                                    | <b>31.0</b>                                    | <b>37.8</b>                                      | <b>23.0</b>                        | <b>17.6</b>                                             | <b>16.7</b>                               | <b>21.5</b>                                    | <b>16.9</b>                                  | <b>27.5</b>                                             | <b>23.9</b>                                        | <b>21.2</b>                      | <b>30.3</b>                             | <b>20.2</b>                                         | <b>12.3</b>                     | <b>10.6</b>                                 | <b>11.5</b>                                            | <b>12.8</b>                                            |
| <b>SD</b>                             | <b>1.03</b>                     | <b>0.66</b>                                        | <b>0.73</b>                     | <b>1.10</b>                      | <b>0.58</b>                                 | <b>0.43</b>                       | <b>1.58</b>                                    | <b>2.65</b>                                    | <b>2.87</b>                                      | <b>1.48</b>                        | <b>1.37</b>                                             | <b>0.37</b>                               | <b>0.88</b>                                    | <b>0.31</b>                                  | <b>0.99</b>                                             | <b>0.71</b>                                        | <b>1.30</b>                      | <b>1.44</b>                             | <b>0.45</b>                                         | <b>0.24</b>                     | <b>0.97</b>                                 | <b>0.82</b>                                            | <b>0.34</b>                                            |
| <b>%RSD</b>                           | <b>3.0</b>                      | <b>2.6</b>                                         | <b>7.2</b>                      | <b>16.4</b>                      | <b>5.0</b>                                  | <b>1.4</b>                        | <b>4.8</b>                                     | <b>8.6</b>                                     | <b>7.6</b>                                       | <b>6.4</b>                         | <b>7.8</b>                                              | <b>2.2</b>                                | <b>4.1</b>                                     | <b>1.8</b>                                   | <b>3.6</b>                                              | <b>3.0</b>                                         | <b>6.1</b>                       | <b>4.8</b>                              | <b>2.2</b>                                          | <b>1.9</b>                      | <b>9.1</b>                                  | <b>7.1</b>                                             | <b>2.7</b>                                             |

**Table S20a.** SIFT-MS LOQ data for Mix 1 in 5% DMI:95% water at three levels (1, 2, and 5).

| Level—Replicate<br>Number; Statistics | Acetone<br>(NO <sup>+</sup> 88) | Acetonitrile<br>(H <sub>3</sub> O <sup>+</sup> 42) | Benzene<br>(NO <sup>+</sup> 78) | Benzene<br>(NO <sup>+</sup> 108) | Benzene<br>(O <sub>2</sub> <sup>+</sup> 78) | 1-Butanol<br>(NO <sup>+</sup> 73) | Chloroform<br>(O <sub>2</sub> <sup>+</sup> 83) | Chloroform<br>(O <sub>2</sub> <sup>+</sup> 85) | Isooctane<br>(H <sub>3</sub> O <sup>+</sup> 113) | Isooctane<br>(NO <sup>+</sup> 113) | Isopropyl alcohol<br>(H <sub>3</sub> O <sup>+</sup> 43) | Isopropyl alcohol<br>(NO <sup>+</sup> 59) | Methanol<br>(H <sub>3</sub> O <sup>+</sup> 33) | Methyl ethyl ketone<br>(NO <sup>+</sup> 102) | Methyl ethyl ketone<br>(O <sub>2</sub> <sup>+</sup> 72) | Nitromethane<br>(H <sub>3</sub> O <sup>+</sup> 62) | Propanal<br>(NO <sup>+</sup> 57) | Tetrahydrofuran<br>(NO <sup>+</sup> 71) | Tetrahydrofuran<br>(O <sub>2</sub> <sup>+</sup> 71) | Toluene<br>(NO <sup>+</sup> 92) | Toluene<br>(O <sub>2</sub> <sup>+</sup> 92) | Trichloroethylene<br>(O <sub>2</sub> <sup>+</sup> 130) | Trichloroethylene<br>(O <sub>2</sub> <sup>+</sup> 132) |
|---------------------------------------|---------------------------------|----------------------------------------------------|---------------------------------|----------------------------------|---------------------------------------------|-----------------------------------|------------------------------------------------|------------------------------------------------|--------------------------------------------------|------------------------------------|---------------------------------------------------------|-------------------------------------------|------------------------------------------------|----------------------------------------------|---------------------------------------------------------|----------------------------------------------------|----------------------------------|-----------------------------------------|-----------------------------------------------------|---------------------------------|---------------------------------------------|--------------------------------------------------------|--------------------------------------------------------|
| 1–1                                   | 4.2                             | 7.6                                                | 1.3                             | -1.1                             | 0.1                                         | 5.1                               | 2.9                                            | 8.2                                            | 16.0                                             | 3.9                                | 3.8                                                     | 3.0                                       | 4.1                                            | 3.0                                          | 7.1                                                     | 5.2                                                | 4.5                              | 7.1                                     | 4.1                                                 | 2.4                             | 3.2                                         | 2.4                                                    | 2.3                                                    |
| 1–2                                   | 7.5                             | 17.2                                               | 1.8                             | -1.3                             | 1.1                                         | 6.2                               | 5.3                                            | 8.7                                            | 42.0                                             | 10.6                               | 6.8                                                     | 3.5                                       | 5.1                                            | 2.6                                          | 7.7                                                     | 4.9                                                | 4.8                              | 8.9                                     | 7.1                                                 | 2.0                             | 1.3                                         | 1.7                                                    | 0.0                                                    |
| 1–3                                   | 6.1                             | 17.7                                               | 3.0                             | -0.1                             | 1.4                                         | 5.6                               | 8.4                                            | 6.1                                            | 14.0                                             | 12.3                               | 3.9                                                     | 2.9                                       | 3.8                                            | 3.2                                          | 5.4                                                     | 5.1                                                | 4.1                              | 6.8                                     | 6.4                                                 | 2.3                             | 2.4                                         | 0.9                                                    | 1.7                                                    |
| <b>Mean</b>                           | <b>6.0</b>                      | <b>14.2</b>                                        | <b>2.0</b>                      | <b>-0.8</b>                      | <b>0.9</b>                                  | <b>5.6</b>                        | <b>5.5</b>                                     | <b>7.7</b>                                     | <b>24.0</b>                                      | <b>8.9</b>                         | <b>4.8</b>                                              | <b>3.1</b>                                | <b>4.3</b>                                     | <b>2.9</b>                                   | <b>6.7</b>                                              | <b>5.1</b>                                         | <b>4.5</b>                       | <b>7.6</b>                              | <b>5.9</b>                                          | <b>2.2</b>                      | <b>2.3</b>                                  | <b>1.7</b>                                             | <b>1.3</b>                                             |
| <b>SD</b>                             | <b>1.35</b>                     | <b>4.65</b>                                        | <b>0.75</b>                     | <b>0.52</b>                      | <b>0.54</b>                                 | <b>0.45</b>                       | <b>2.25</b>                                    | <b>1.13</b>                                    | <b>12.75</b>                                     | <b>3.63</b>                        | <b>1.39</b>                                             | <b>0.28</b>                               | <b>0.56</b>                                    | <b>0.25</b>                                  | <b>0.97</b>                                             | <b>0.11</b>                                        | <b>0.29</b>                      | <b>0.93</b>                             | <b>1.28</b>                                         | <b>0.18</b>                     | <b>0.76</b>                                 | <b>0.59</b>                                            | <b>0.96</b>                                            |
| <b>%RSD</b>                           | <b>22.7</b>                     | <b>32.8</b>                                        | <b>36.8</b>                     | <b>-63.2</b>                     | <b>63.5</b>                                 | <b>8.0</b>                        | <b>40.7</b>                                    | <b>14.7</b>                                    | <b>53.1</b>                                      | <b>40.6</b>                        | <b>29.1</b>                                             | <b>8.9</b>                                | <b>12.8</b>                                    | <b>8.5</b>                                   | <b>14.5</b>                                             | <b>2.2</b>                                         | <b>6.4</b>                       | <b>12.2</b>                             | <b>21.8</b>                                         | <b>8.3</b>                      | <b>32.6</b>                                 | <b>35.5</b>                                            | <b>72.1</b>                                            |
| 2–1                                   | 12.1                            | 18.5                                               | 3.2                             | 2.5                              | 2.1                                         | 11.3                              | 8.5                                            | 14.1                                           | -1.0                                             | 11.9                               | 8.0                                                     | 6.9                                       | 9.1                                            | 6.1                                          | 8.8                                                     | 10.0                                               | 7.5                              | 13.0                                    | 8.5                                                 | 4.4                             | 2.3                                         | 2.4                                                    | 3.2                                                    |
| 2–2                                   | 10.5                            | 17.5                                               | 2.7                             | 2.4                              | 3.0                                         | 12.8                              | 10.3                                           | 12.5                                           | 3.0                                              | 13.5                               | 6.7                                                     | 6.2                                       | 9.4                                            | 5.3                                          | 8.7                                                     | 9.2                                                | 8.1                              | 12.6                                    | 11.4                                                | 4.0                             | 3.5                                         | 2.9                                                    | 3.3                                                    |
| 2–3                                   | 12.9                            | 21.5                                               | 3.2                             | 2.2                              | 2.5                                         | 11.2                              | 10.6                                           | 13.6                                           | 3.0                                              | 18.8                               | 8.5                                                     | 5.6                                       | 9.0                                            | 5.1                                          | 10.5                                                    | 10.7                                               | 7.0                              | 12.3                                    | 8.1                                                 | 4.8                             | 3.3                                         | 4.2                                                    | 3.6                                                    |
| <b>Mean</b>                           | <b>11.9</b>                     | <b>19.2</b>                                        | <b>3.0</b>                      | <b>2.3</b>                       | <b>2.5</b>                                  | <b>11.8</b>                       | <b>9.8</b>                                     | <b>13.4</b>                                    | <b>1.7</b>                                       | <b>14.7</b>                        | <b>7.7</b>                                              | <b>6.2</b>                                | <b>9.2</b>                                     | <b>5.5</b>                                   | <b>9.3</b>                                              | <b>10.0</b>                                        | <b>7.5</b>                       | <b>12.6</b>                             | <b>9.3</b>                                          | <b>4.4</b>                      | <b>3.0</b>                                  | <b>3.2</b>                                             | <b>3.4</b>                                             |
| <b>SD</b>                             | <b>1.00</b>                     | <b>1.70</b>                                        | <b>0.23</b>                     | <b>0.10</b>                      | <b>0.35</b>                                 | <b>0.73</b>                       | <b>0.93</b>                                    | <b>0.67</b>                                    | <b>1.89</b>                                      | <b>2.95</b>                        | <b>0.76</b>                                             | <b>0.53</b>                               | <b>0.17</b>                                    | <b>0.43</b>                                  | <b>0.83</b>                                             | <b>0.61</b>                                        | <b>0.45</b>                      | <b>0.29</b>                             | <b>1.47</b>                                         | <b>0.31</b>                     | <b>0.54</b>                                 | <b>0.79</b>                                            | <b>0.16</b>                                            |
| <b>%RSD</b>                           | <b>8.4</b>                      | <b>8.9</b>                                         | <b>7.6</b>                      | <b>4.2</b>                       | <b>14.0</b>                                 | <b>6.2</b>                        | <b>9.5</b>                                     | <b>5.0</b>                                     | <b>113.1</b>                                     | <b>20.0</b>                        | <b>9.9</b>                                              | <b>8.6</b>                                | <b>1.9</b>                                     | <b>7.9</b>                                   | <b>8.8</b>                                              | <b>6.1</b>                                         | <b>6.0</b>                       | <b>2.3</b>                              | <b>15.8</b>                                         | <b>7.1</b>                      | <b>17.9</b>                                 | <b>25.0</b>                                            | <b>4.8</b>                                             |
| 5–1                                   | 32.9                            | 11.8                                               | 8.5                             | 6.1                              | 7.5                                         | 26.7                              | 17.4                                           | 19.1                                           | 48.0                                             | 34.3                               | 14.1                                                    | 13.0                                      | 14.3                                           | 13.6                                         | 27.4                                                    | 24.9                                               | 19.6                             | 26.6                                    | 18.2                                                | 10.5                            | 7.3                                         | 12.1                                                   | 9.1                                                    |
| 5–2                                   | 27.4                            | 11.6                                               | 9.3                             | 4.9                              | 6.6                                         | 26.6                              | 17.0                                           | 20.3                                           | 18.0                                             | 19.0                               | 13.5                                                    | 11.5                                      | 17.8                                           | 13.2                                         | 23.2                                                    | 24.4                                               | 20.4                             | 25.9                                    | 18.4                                                | 11.5                            | 7.1                                         | 9.6                                                    | 9.8                                                    |
| 5–3                                   | 29.2                            | 9.7                                                | 10.3                            | 5.2                              | 8.2                                         | 26.8                              | 18.5                                           | 19.9                                           | 35.0                                             | 23.3                               | 14.5                                                    | 11.8                                      | 16.3                                           | 13.0                                         | 26.8                                                    | 24.6                                               | 23.8                             | 26.0                                    | 19.7                                                | 11.5                            | 8.4                                         | 11.5                                                   | 11.0                                                   |
| <b>Mean</b>                           | <b>29.9</b>                     | <b>11.0</b>                                        | <b>9.3</b>                      | <b>5.4</b>                       | <b>7.4</b>                                  | <b>26.7</b>                       | <b>17.6</b>                                    | <b>19.8</b>                                    | <b>33.7</b>                                      | <b>25.5</b>                        | <b>14.0</b>                                             | <b>12.1</b>                               | <b>16.1</b>                                    | <b>13.3</b>                                  | <b>25.8</b>                                             | <b>24.6</b>                                        | <b>21.3</b>                      | <b>26.2</b>                             | <b>18.8</b>                                         | <b>11.2</b>                     | <b>7.6</b>                                  | <b>11.0</b>                                            | <b>9.9</b>                                             |
| <b>SD</b>                             | <b>2.29</b>                     | <b>0.95</b>                                        | <b>0.74</b>                     | <b>0.51</b>                      | <b>0.65</b>                                 | <b>0.08</b>                       | <b>0.63</b>                                    | <b>0.50</b>                                    | <b>12.28</b>                                     | <b>6.44</b>                        | <b>0.41</b>                                             | <b>0.65</b>                               | <b>1.43</b>                                    | <b>0.25</b>                                  | <b>1.85</b>                                             | <b>0.21</b>                                        | <b>1.82</b>                      | <b>0.31</b>                             | <b>0.66</b>                                         | <b>0.47</b>                     | <b>0.57</b>                                 | <b>1.07</b>                                            | <b>0.78</b>                                            |
| <b>%RSD</b>                           | <b>7.7</b>                      | <b>8.6</b>                                         | <b>7.9</b>                      | <b>9.5</b>                       | <b>8.8</b>                                  | <b>0.31</b>                       | <b>3.6</b>                                     | <b>2.5</b>                                     | <b>36.5</b>                                      | <b>25.2</b>                        | <b>2.9</b>                                              | <b>5.4</b>                                | <b>8.9</b>                                     | <b>1.9</b>                                   | <b>7.2</b>                                              | <b>0.83</b>                                        | <b>8.6</b>                       | <b>1.2</b>                              | <b>3.5</b>                                          | <b>4.2</b>                      | <b>7.5</b>                                  | <b>9.7</b>                                             | <b>7.9</b>                                             |

**Table S20b.** SIFT-MS LOQ data for Mix 1 in 10% DMI:90% water at three levels (1, 2, and 5).

| Level—Replicate<br>Number; Statistics | Acetone<br>(NO <sup>+</sup> 88) | Acetonitrile<br>(H <sub>3</sub> O <sup>+</sup> 42) | Benzene<br>(NO <sup>+</sup> 78) | Benzene<br>(NO <sup>+</sup> 108) | Benzene<br>(O <sub>2</sub> <sup>+</sup> 78) | 1-Butanol<br>(NO <sup>+</sup> 73) | Chloroform<br>(O <sub>2</sub> <sup>+</sup> 83) | Chloroform<br>(O <sub>2</sub> <sup>+</sup> 85) | Isooctane<br>(H <sub>3</sub> O <sup>+</sup> 113) | Isooctane<br>(NO <sup>+</sup> 113) | Isopropyl alcohol<br>(H <sub>3</sub> O <sup>+</sup> 43) | Isopropyl alcohol<br>(NO <sup>+</sup> 59) | Methanol<br>(H <sub>3</sub> O <sup>+</sup> 33) | Methyl ethyl ketone<br>(NO <sup>+</sup> 102) | Methyl ethyl ketone<br>(O <sub>2</sub> <sup>+</sup> 72) | Nitromethane<br>(H <sub>3</sub> O <sup>+</sup> 62) | Propanal<br>(NO <sup>+</sup> 57) | Tetrahydrofuran<br>(NO <sup>+</sup> 71) | Tetrahydrofuran<br>(O <sub>2</sub> <sup>+</sup> 71) | Toluene<br>(NO <sup>+</sup> 92) | Toluene<br>(O <sub>2</sub> <sup>+</sup> 92) | Trichloroethylene<br>(O <sub>2</sub> <sup>+</sup> 130) | Trichloroethylene<br>(O <sub>2</sub> <sup>+</sup> 132) |
|---------------------------------------|---------------------------------|----------------------------------------------------|---------------------------------|----------------------------------|---------------------------------------------|-----------------------------------|------------------------------------------------|------------------------------------------------|--------------------------------------------------|------------------------------------|---------------------------------------------------------|-------------------------------------------|------------------------------------------------|----------------------------------------------|---------------------------------------------------------|----------------------------------------------------|----------------------------------|-----------------------------------------|-----------------------------------------------------|---------------------------------|---------------------------------------------|--------------------------------------------------------|--------------------------------------------------------|
| 1–1                                   | 6.4                             | 11.9                                               | -0.3                            | 2.5                              | 1.0                                         | 5.5                               | 2.0                                            | 0.7                                            | -48.0                                            | -1.8                               | 3.2                                                     | 2.6                                       | 4.2                                            | 2.5                                          | 1.4                                                     | 5.0                                                | 3.3                              | 3.9                                     | 1.4                                                 | 0.3                             | 2.7                                         | 2.2                                                    | 1.3                                                    |
| 1–2                                   | 4.8                             | 11.8                                               | -0.2                            | -0.7                             | 0.7                                         | 5.6                               | 1.8                                            | -0.7                                           | -62.0                                            | 2.1                                | 2.9                                                     | 2.7                                       | 3.8                                            | 2.0                                          | 1.8                                                     | 4.8                                                | 0.8                              | 4.0                                     | 1.8                                                 | -0.7                            | 3.4                                         | 1.2                                                    | -1.2                                                   |
| 1–3                                   | 6.8                             | 14.4                                               | 1.6                             | -2.8                             | 1.2                                         | 4.6                               | 2.8                                            | -0.4                                           | -88.0                                            | 3.3                                | 4.1                                                     | 4.6                                       | 5.8                                            | 2.1                                          | -0.5                                                    | 5.0                                                | 2.4                              | 5.4                                     | 4.7                                                 | 1.8                             | 2.7                                         | 2.4                                                    | 3.7                                                    |
| <b>Mean</b>                           | <b>6.0</b>                      | <b>12.7</b>                                        | <b>0.4</b>                      | <b>-0.3</b>                      | <b>1.0</b>                                  | <b>5.2</b>                        | <b>2.2</b>                                     | <b>-0.1</b>                                    | <b>-66.0</b>                                     | <b>1.2</b>                         | <b>3.4</b>                                              | <b>3.3</b>                                | <b>4.6</b>                                     | <b>2.2</b>                                   | <b>0.9</b>                                              | <b>4.9</b>                                         | <b>2.2</b>                       | <b>4.4</b>                              | <b>2.6</b>                                          | <b>0.5</b>                      | <b>2.9</b>                                  | <b>1.9</b>                                             | <b>1.3</b>                                             |
| <b>SD</b>                             | <b>0.86</b>                     | <b>1.20</b>                                        | <b>0.89</b>                     | <b>2.18</b>                      | <b>0.20</b>                                 | <b>0.47</b>                       | <b>0.43</b>                                    | <b>0.60</b>                                    | <b>16.57</b>                                     | <b>2.18</b>                        | <b>0.51</b>                                             | <b>0.93</b>                               | <b>0.86</b>                                    | <b>0.19</b>                                  | <b>1.00</b>                                             | <b>0.10</b>                                        | <b>1.03</b>                      | <b>0.68</b>                             | <b>1.47</b>                                         | <b>1.02</b>                     | <b>0.34</b>                                 | <b>0.53</b>                                            | <b>1.99</b>                                            |
| <b>%RSD</b>                           | <b>14.4</b>                     | <b>9.5</b>                                         | <b>227.2</b>                    | <b>-653.8</b>                    | <b>20.6</b>                                 | <b>9.1</b>                        | <b>19.6</b>                                    | <b>-451.4</b>                                  | <b>-25.1</b>                                     | <b>181.4</b>                       | <b>15.0</b>                                             | <b>28.0</b>                               | <b>18.8</b>                                    | <b>8.8</b>                                   | <b>111.5</b>                                            | <b>2.0</b>                                         | <b>47.7</b>                      | <b>15.4</b>                             | <b>55.8</b>                                         | <b>208.8</b>                    | <b>11.6</b>                                 | <b>27.3</b>                                            | <b>154.5</b>                                           |
| 2–1                                   | 11.7                            | 16.8                                               | 1.1                             | 1.8                              | 2.8                                         | 10.4                              | 6.1                                            | 5.0                                            | -49.0                                            | 7.7                                | 7.5                                                     | 6.9                                       | 12.4                                           | 4.5                                          | 6.5                                                     | 8.8                                                | 6.8                              | 11.9                                    | 7.8                                                 | 2.3                             | 2.9                                         | 2.9                                                    | 3.3                                                    |
| 2–2                                   | 12.0                            | 23.4                                               | 2.8                             | 2.5                              | 2.6                                         | 11.6                              | 12.2                                           | 3.7                                            | 31.0                                             | 2.9                                | 8.1                                                     | 6.6                                       | 15.6                                           | 5.3                                          | 7.3                                                     | 10.9                                               | 9.0                              | 14.2                                    | 7.2                                                 | 4.8                             | 4.6                                         | 6.0                                                    | 6.8                                                    |
| 2–3                                   | 10.4                            | 15.3                                               | 1.6                             | 3.7                              | 2.6                                         | 9.4                               | 6.3                                            | 3.5                                            | -13.0                                            | 3.1                                | 7.1                                                     | 5.8                                       | 14.4                                           | 4.4                                          | 7.2                                                     | 9.3                                                | 4.8                              | 9.0                                     | 7.5                                                 | 0.9                             | 0.7                                         | 1.8                                                    | 2.5                                                    |
| <b>Mean</b>                           | <b>11.4</b>                     | <b>18.5</b>                                        | <b>1.8</b>                      | <b>2.7</b>                       | <b>2.7</b>                                  | <b>10.5</b>                       | <b>8.2</b>                                     | <b>4.1</b>                                     | <b>-10.3</b>                                     | <b>4.6</b>                         | <b>7.6</b>                                              | <b>6.5</b>                                | <b>14.1</b>                                    | <b>4.8</b>                                   | <b>7.0</b>                                              | <b>9.7</b>                                         | <b>6.9</b>                       | <b>11.7</b>                             | <b>7.5</b>                                          | <b>2.7</b>                      | <b>2.7</b>                                  | <b>3.6</b>                                             | <b>4.2</b>                                             |
| <b>SD</b>                             | <b>0.69</b>                     | <b>3.52</b>                                        | <b>0.73</b>                     | <b>0.78</b>                      | <b>0.07</b>                                 | <b>0.90</b>                       | <b>2.83</b>                                    | <b>0.66</b>                                    | <b>32.71</b>                                     | <b>2.22</b>                        | <b>0.41</b>                                             | <b>0.46</b>                               | <b>1.32</b>                                    | <b>0.38</b>                                  | <b>0.36</b>                                             | <b>0.86</b>                                        | <b>1.72</b>                      | <b>2.13</b>                             | <b>0.24</b>                                         | <b>1.61</b>                     | <b>1.61</b>                                 | <b>1.75</b>                                            | <b>1.87</b>                                            |
| <b>%RSD</b>                           | <b>6.1</b>                      | <b>19.0</b>                                        | <b>39.5</b>                     | <b>29.4</b>                      | <b>2.7</b>                                  | <b>8.6</b>                        | <b>34.5</b>                                    | <b>16.4</b>                                    | <b>-316.6</b>                                    | <b>48.5</b>                        | <b>5.4</b>                                              | <b>7.2</b>                                | <b>9.3</b>                                     | <b>8.1</b>                                   | <b>5.1</b>                                              | <b>8.9</b>                                         | <b>25.0</b>                      | <b>18.2</b>                             | <b>3.3</b>                                          | <b>60.3</b>                     | <b>58.4</b>                                 | <b>49.3</b>                                            | <b>44.9</b>                                            |
| 5–1                                   | 27.2                            | 27.0                                               | 6.6                             | 3.7                              | 5.2                                         | 21.2                              | 23.4                                           | 18.0                                           | -45.0                                            | 16.6                               | 12.5                                                    | 14.6                                      | 17.0                                           | 12.0                                         | 24.9                                                    | 23.7                                               | 19.9                             | 22.3                                    | 14.3                                                | 7.5                             | 6.2                                         | 10.5                                                   | 7.5                                                    |
| 5–2                                   | 27.6                            | 30.2                                               | 5.9                             | 2.7                              | 4.5                                         | 22.5                              | 21.4                                           | 15.6                                           | -43.0                                            | 16.2                               | 13.5                                                    | 12.2                                      | 19.2                                           | 11.4                                         | 18.9                                                    | 23.1                                               | 17.8                             | 19.8                                    | 16.4                                                | 6.5                             | 5.7                                         | 10.1                                                   | 7.5                                                    |
| 5–3                                   | 23.9                            | 27.9                                               | 3.6                             | 3.9                              | 4.6                                         | 21.1                              | 21.4                                           | 15.4                                           | -38.0                                            | 13.4                               | 14.1                                                    | 13.4                                      | 17.2                                           | 10.4                                         | 22.6                                                    | 24.1                                               | 17.3                             | 21.5                                    | 15.0                                                | 6.4                             | 7.1                                         | 8.5                                                    | 6.2                                                    |
| <b>Mean</b>                           | <b>26.2</b>                     | <b>28.4</b>                                        | <b>5.4</b>                      | <b>3.4</b>                       | <b>4.8</b>                                  | <b>21.6</b>                       | <b>22.1</b>                                    | <b>16.3</b>                                    | <b>-42.0</b>                                     | <b>15.4</b>                        | <b>13.4</b>                                             | <b>13.4</b>                               | <b>17.8</b>                                    | <b>11.3</b>                                  | <b>22.1</b>                                             | <b>23.6</b>                                        | <b>18.3</b>                      | <b>21.2</b>                             | <b>15.2</b>                                         | <b>6.8</b>                      | <b>6.4</b>                                  | <b>9.7</b>                                             | <b>7.0</b>                                             |
| <b>SD</b>                             | <b>1.66</b>                     | <b>1.35</b>                                        | <b>1.26</b>                     | <b>0.52</b>                      | <b>0.31</b>                                 | <b>0.64</b>                       | <b>0.94</b>                                    | <b>1.18</b>                                    | <b>2.94</b>                                      | <b>1.42</b>                        | <b>0.66</b>                                             | <b>0.98</b>                               | <b>0.99</b>                                    | <b>0.66</b>                                  | <b>2.47</b>                                             | <b>0.41</b>                                        | <b>1.13</b>                      | <b>1.04</b>                             | <b>0.87</b>                                         | <b>0.50</b>                     | <b>0.58</b>                                 | <b>0.86</b>                                            | <b>0.61</b>                                            |
| <b>%RSD</b>                           | <b>6.3</b>                      | <b>4.8</b>                                         | <b>23.5</b>                     | <b>15.3</b>                      | <b>6.6</b>                                  | <b>2.9</b>                        | <b>4.3</b>                                     | <b>7.2</b>                                     | <b>-7.0</b>                                      | <b>9.2</b>                         | <b>4.9</b>                                              | <b>7.3</b>                                | <b>5.6</b>                                     | <b>5.9</b>                                   | <b>11.2</b>                                             | <b>1.7</b>                                         | <b>6.1</b>                       | <b>4.9</b>                              | <b>5.7</b>                                          | <b>7.3</b>                      | <b>9.1</b>                                  | <b>9.0</b>                                             | <b>8.7</b>                                             |



**Table S20c.** SIFT-MS LOQ data for Mix 1 in 100% DMI at five levels (1, 2, 5, 10, and 20). The replicate indicated in red is an outlier and was not included in the calculation.

| Level—Replicate<br>Number; Statistics | Acetone<br>(NO <sup>+</sup> 88) | Acetonitrile<br>(H <sub>3</sub> O <sup>+</sup> 42) | Benzene<br>(NO <sup>+</sup> 78) | Benzene<br>(NO <sup>+</sup> 108) | Benzene<br>(O <sub>2</sub> <sup>+</sup> 78) | 1-Butanol<br>(NO <sup>+</sup> 73) | Chloroform<br>(O <sub>2</sub> <sup>+</sup> 83) | Chloroform<br>(O <sub>2</sub> <sup>+</sup> 85) | Isooctane<br>(H <sub>3</sub> O <sup>+</sup> 113) | Isooctane<br>(NO <sup>+</sup> 113) | Isopropyl alcohol<br>(H <sub>3</sub> O <sup>+</sup> 43) | Isopropyl alcohol<br>(NO <sup>+</sup> 59) | Methanol<br>(H <sub>3</sub> O <sup>+</sup> 33) | Methyl ethyl ketone<br>(NO <sup>+</sup> 102) | Methyl ethyl ketone<br>(O <sub>2</sub> <sup>+</sup> 72) | Nitromethane<br>(H <sub>3</sub> O <sup>+</sup> 62) | Propanal<br>(NO <sup>+</sup> 57) | Tetrahydrofuran<br>(NO <sup>+</sup> 71) | Tetrahydrofuran<br>(O <sub>2</sub> <sup>+</sup> 71) | Toluene<br>(NO <sup>+</sup> 92) | Toluene<br>(O <sub>2</sub> <sup>+</sup> 92) | Trichloroethylene<br>(O <sub>2</sub> <sup>+</sup> 130) | Trichloroethylene<br>(O <sub>2</sub> <sup>+</sup> 132) |
|---------------------------------------|---------------------------------|----------------------------------------------------|---------------------------------|----------------------------------|---------------------------------------------|-----------------------------------|------------------------------------------------|------------------------------------------------|--------------------------------------------------|------------------------------------|---------------------------------------------------------|-------------------------------------------|------------------------------------------------|----------------------------------------------|---------------------------------------------------------|----------------------------------------------------|----------------------------------|-----------------------------------------|-----------------------------------------------------|---------------------------------|---------------------------------------------|--------------------------------------------------------|--------------------------------------------------------|
| 1–1                                   | 18.0                            | -53.0                                              | 0.2                             | 0.0                              | -0.2                                        | 1.9                               | 1.3                                            | -19.9                                          | -375.0                                           | -162.0                             | 3.9                                                     | -210.0                                    | 38.0                                           | 3.9                                          | 15.0                                                    | 5.0                                                | 3.5                              | 4.5                                     | 21.7                                                | 0.1                             | 0.3                                         | -0.1                                                   | 0.5                                                    |
| 1–2                                   | 20.9                            | -63.0                                              | -0.2                            | -0.1                             | -0.3                                        | 2.0                               | 2.0                                            | -2.9                                           | -220.0                                           | -55.0                              | 4.6                                                     | -220.0                                    | 37.0                                           | 3.3                                          | 13.0                                                    | 4.5                                                | 3.9                              | 11.0                                    | 26.4                                                | -0.4                            | 0.2                                         | -0.3                                                   | -0.7                                                   |
| <b>1–3</b>                            |                                 |                                                    |                                 |                                  |                                             |                                   |                                                |                                                |                                                  |                                    |                                                         |                                           |                                                |                                              |                                                         |                                                    |                                  |                                         |                                                     |                                 |                                             |                                                        |                                                        |
| <b>Mean</b>                           | <b>19.5</b>                     | <b>-58.0</b>                                       | <b>0.0</b>                      | <b>-0.1</b>                      | <b>-0.2</b>                                 | <b>1.9</b>                        | <b>1.7</b>                                     | <b>-11.4</b>                                   | <b>-297.5</b>                                    | <b>-108.5</b>                      | <b>4.3</b>                                              | <b>-215.0</b>                             | <b>37.5</b>                                    | <b>3.6</b>                                   | <b>14.0</b>                                             | <b>4.7</b>                                         | <b>3.7</b>                       | <b>7.8</b>                              | <b>24.1</b>                                         | <b>-0.1</b>                     | <b>0.3</b>                                  | <b>-0.2</b>                                            | <b>-0.1</b>                                            |
| <b>SD</b>                             | <b>1.45</b>                     | <b>5.00</b>                                        | <b>0.17</b>                     | <b>0.04</b>                      | <b>0.03</b>                                 | <b>0.09</b>                       | <b>0.35</b>                                    | <b>8.50</b>                                    | <b>77.5</b>                                      | <b>53.5</b>                        | <b>0.35</b>                                             | <b>5.00</b>                               | <b>0.50</b>                                    | <b>0.33</b>                                  | <b>1.00</b>                                             | <b>0.27</b>                                        | <b>0.20</b>                      | <b>3.25</b>                             | <b>2.35</b>                                         | <b>0.22</b>                     | <b>0.03</b>                                 | <b>0.09</b>                                            | <b>0.60</b>                                            |
| <b>%RSD</b>                           | <b>7.5</b>                      | <b>-8.6</b>                                        | <b>4350.0</b>                   | <b>-41.2</b>                     | <b>-12.2</b>                                | <b>4.4</b>                        | <b>21.2</b>                                    | <b>-74.6</b>                                   | <b>-26.1</b>                                     | <b>-49.3</b>                       | <b>8.2</b>                                              | <b>-2.3</b>                               | <b>1.3</b>                                     | <b>9.1</b>                                   | <b>7.1</b>                                              | <b>5.6</b>                                         | <b>5.4</b>                       | <b>41.9</b>                             | <b>9.8</b>                                          | <b>-163.4</b>                   | <b>11.2</b>                                 | <b>-42.3</b>                                           | <b>-545.5</b>                                          |
| 2–1                                   | 42.2                            | -51.0                                              | 0.4                             | -1.0                             | 0.4                                         | 5.1                               | 4.1                                            | 43.0                                           | 1090.0                                           | 367.0                              | 12.8                                                    | -199.0                                    | 60.0                                           | 6.8                                          | 43.0                                                    | 9.8                                                | 7.9                              | 13.7                                    | 50.6                                                | 0.1                             | 0.4                                         | 1.1                                                    | -1.4                                                   |
| 2–2                                   | 48.9                            | -59.0                                              | -0.2                            | -1.0                             | -0.2                                        | 4.9                               | 1.0                                            | 20.0                                           | 290.0                                            | 133.0                              | 12.2                                                    | -212.0                                    | 61.0                                           | 7.5                                          | 39.0                                                    | 8.8                                                | 2.7                              | 17.2                                    | 47.6                                                | -0.2                            | 0.3                                         | 0.6                                                    | -0.3                                                   |
| 2–3                                   | 40.5                            | -50.0                                              | -0.3                            | -1.0                             | 0.0                                         | 4.8                               | 2.6                                            | 14.0                                           | -60.0                                            | 50.0                               | 11.2                                                    | -190.0                                    | 54.0                                           | 6.0                                          | 35.0                                                    | 8.0                                                | 7.7                              | 16.1                                    | 41.3                                                | -0.3                            | 0.7                                         | -0.5                                                   | -0.5                                                   |
| <b>Mean</b>                           | <b>43.9</b>                     | <b>-53.3</b>                                       | <b>0.0</b>                      | <b>-1.0</b>                      | <b>0.1</b>                                  | <b>4.9</b>                        | <b>2.6</b>                                     | <b>25.7</b>                                    | <b>440.0</b>                                     | <b>183.3</b>                       | <b>12.1</b>                                             | <b>-200.3</b>                             | <b>58.3</b>                                    | <b>6.7</b>                                   | <b>39.0</b>                                             | <b>8.8</b>                                         | <b>6.1</b>                       | <b>15.7</b>                             | <b>46.5</b>                                         | <b>-0.1</b>                     | <b>0.5</b>                                  | <b>0.4</b>                                             | <b>-0.7</b>                                            |
| <b>SD</b>                             | <b>3.63</b>                     | <b>4.03</b>                                        | <b>0.28</b>                     | <b>0.01</b>                      | <b>0.26</b>                                 | <b>0.12</b>                       | <b>1.27</b>                                    | <b>12.50</b>                                   | <b>481.3</b>                                     | <b>134.2</b>                       | <b>0.66</b>                                             | <b>9.03</b>                               | <b>3.09</b>                                    | <b>0.61</b>                                  | <b>3.27</b>                                             | <b>0.72</b>                                        | <b>2.41</b>                      | <b>1.46</b>                             | <b>3.88</b>                                         | <b>0.14</b>                     | <b>0.19</b>                                 | <b>0.66</b>                                            | <b>0.48</b>                                            |
| <b>%RSD</b>                           | <b>8.3</b>                      | <b>-7.6</b>                                        | <b>-1715.5</b>                  | <b>-0.7</b>                      | <b>304.4</b>                                | <b>2.6</b>                        | <b>49.3</b>                                    | <b>48.7</b>                                    | <b>109.4</b>                                     | <b>73.2</b>                        | <b>5.5</b>                                              | <b>-4.5</b>                               | <b>5.3</b>                                     | <b>9.1</b>                                   | <b>8.4</b>                                              | <b>8.1</b>                                         | <b>39.4</b>                      | <b>9.3</b>                              | <b>8.3</b>                                          | <b>-114.0</b>                   | <b>38.9</b>                                 | <b>159.5</b>                                           | <b>-66.7</b>                                           |
| 5–1                                   | 106.3                           | -25.0                                              | 0.7                             | -0.4                             | -0.1                                        | 10.9                              | 0.9                                            | -22.4                                          | -490.0                                           | -168.0                             | 24.5                                                    | -176.0                                    | 110.0                                          | 16.2                                         | 33.0                                                    | 22.7                                               | 7.5                              | 43.4                                    | 40.8                                                | -0.2                            | 0.3                                         | 0.2                                                    | -0.7                                                   |
| 5–2                                   | 96.3                            | 47.0                                               | 0.5                             | -1.0                             | 0.8                                         | 10.7                              | 0.9                                            | -0.6                                           | -80.0                                            | 67.0                               | 23.2                                                    | -19.0                                     | 101.0                                          | 15.1                                         | 41.0                                                    | 20.4                                               | 7.3                              | 42.4                                    | 38.5                                                | -0.4                            | 0.4                                         | 0.6                                                    | -1.2                                                   |
| 5–3                                   | 93.3                            | 59.0                                               | 0.6                             | 0.2                              | 0.5                                         | 12.6                              | -1.7                                           | -11.6                                          | -389.0                                           | -81.0                              | 25.3                                                    | -17.0                                     | 113.0                                          | 15.2                                         | 36.0                                                    | 19.8                                               | 6.6                              | 43.6                                    | 39.8                                                | 0.0                             | 0.4                                         | 0.0                                                    | -0.3                                                   |
| <b>Mean</b>                           | <b>98.6</b>                     | <b>27.0</b>                                        | <b>0.6</b>                      | <b>-0.4</b>                      | <b>0.4</b>                                  | <b>11.4</b>                       | <b>0.0</b>                                     | <b>-11.5</b>                                   | <b>-319.7</b>                                    | <b>-60.7</b>                       | <b>24.3</b>                                             | <b>-70.7</b>                              | <b>108.0</b>                                   | <b>15.5</b>                                  | <b>36.7</b>                                             | <b>20.9</b>                                        | <b>7.1</b>                       | <b>43.1</b>                             | <b>39.7</b>                                         | <b>-0.2</b>                     | <b>0.4</b>                                  | <b>0.3</b>                                             | <b>-0.7</b>                                            |
| <b>SD</b>                             | <b>5.56</b>                     | <b>37.09</b>                                       | <b>0.11</b>                     | <b>0.49</b>                      | <b>0.38</b>                                 | <b>0.85</b>                       | <b>1.20</b>                                    | <b>8.90</b>                                    | <b>174.4</b>                                     | <b>97.01</b>                       | <b>0.87</b>                                             | <b>74.49</b>                              | <b>5.10</b>                                    | <b>0.50</b>                                  | <b>3.30</b>                                             | <b>1.25</b>                                        | <b>0.39</b>                      | <b>0.52</b>                             | <b>0.94</b>                                         | <b>0.14</b>                     | <b>0.06</b>                                 | <b>0.25</b>                                            | <b>0.39</b>                                            |
| <b>%RSD</b>                           | <b>5.6</b>                      | <b>137.4</b>                                       | <b>18.5</b>                     | <b>-127.0</b>                    | <b>89.14</b>                                | <b>7.5</b>                        | <b>2404.2</b>                                  | <b>-77.2</b>                                   | <b>-54.6</b>                                     | <b>-159.9</b>                      | <b>3.6</b>                                              | <b>-105.4</b>                             | <b>4.7</b>                                     | <b>3.2</b>                                   | <b>9.0</b>                                              | <b>6.0</b>                                         | <b>5.4</b>                       | <b>1.2</b>                              | <b>2.4</b>                                          | <b>-68.2</b>                    | <b>16.3</b>                                 | <b>88.8</b>                                            | <b>-53.2</b>                                           |
| 10–1                                  | 191.3                           | 103.0                                              | 1.1                             | -0.4                             | 1.3                                         | 24.6                              | -2.1                                           | -42.2                                          | -724.0                                           | -351.0                             | 51.9                                                    | 2.0                                       | 231.0                                          | 32.9                                         | 51.0                                                    | 41.6                                               | 18.1                             | 94.0                                    | 51.6                                                | 0.6                             | 1.0                                         | 1.0                                                    | -0.3                                                   |
| 10–2                                  | 201.3                           | 109.0                                              | 2.1                             | 0.7                              | 0.7                                         | 23.3                              | -0.5                                           | -40.0                                          | -704.0                                           | -298.0                             | 53.2                                                    | 32.0                                      | 209.0                                          | 32.7                                         | 46.0                                                    | 43.8                                               | 16.8                             | 95.0                                    | 54.6                                                | 0.7                             | 1.1                                         | 0.5                                                    | 0.5                                                    |
| 10–3                                  | 196.3                           | 115.0                                              | 0.2                             | 0.2                              | 1.4                                         | 24.4                              | -1.8                                           | -43.5                                          | -661.0                                           | -347.0                             | 57.4                                                    | 14.0                                      | 224.0                                          | 33.5                                         | 50.0                                                    | 42.5                                               | 18.4                             | 95.0                                    | 47.6                                                | 0.7                             | 1.0                                         | 0.5                                                    | -1.1                                                   |
| <b>Mean</b>                           | <b>196.3</b>                    | <b>109.0</b>                                       | <b>1.1</b>                      | <b>0.2</b>                       | <b>1.1</b>                                  | <b>24.1</b>                       | <b>-1.5</b>                                    | <b>-41.9</b>                                   | <b>-696.3</b>                                    | <b>-332.0</b>                      | <b>54.2</b>                                             | <b>16.0</b>                               | <b>221.3</b>                                   | <b>33.0</b>                                  | <b>49.0</b>                                             | <b>42.6</b>                                        | <b>17.8</b>                      | <b>94.7</b>                             | <b>51.3</b>                                         | <b>0.7</b>                      | <b>1.0</b>                                  | <b>0.7</b>                                             | <b>-0.3</b>                                            |
| <b>SD</b>                             | <b>4.08</b>                     | <b>4.90</b>                                        | <b>0.76</b>                     | <b>0.45</b>                      | <b>0.29</b>                                 | <b>0.57</b>                       | <b>0.69</b>                                    | <b>1.44</b>                                    | <b>26.28</b>                                     | <b>24.10</b>                       | <b>2.35</b>                                             | <b>12.33</b>                              | <b>9.18</b>                                    | <b>0.34</b>                                  | <b>2.16</b>                                             | <b>0.90</b>                                        | <b>0.69</b>                      | <b>0.47</b>                             | <b>2.87</b>                                         | <b>0.03</b>                     | <b>0.06</b>                                 | <b>0.24</b>                                            | <b>0.63</b>                                            |
| <b>%RSD</b>                           | <b>2.1</b>                      | <b>4.5</b>                                         | <b>66.3</b>                     | <b>286.7</b>                     | <b>26.23</b>                                | <b>2.4</b>                        | <b>-47.2</b>                                   | <b>-3.4</b>                                    | <b>-3.8</b>                                      | <b>-7.3</b>                        | <b>4.3</b>                                              | <b>77.1</b>                               | <b>4.1</b>                                     | <b>1.0</b>                                   | <b>4.4</b>                                              | <b>2.1</b>                                         | <b>3.9</b>                       | <b>0.50</b>                             | <b>5.6</b>                                          | <b>5.0</b>                      | <b>6.2</b>                                  | <b>34.3</b>                                            | <b>-218.3</b>                                          |
| 20–1                                  | 427.3                           | 180.0                                              | 2.1                             | 0.5                              | 2.4                                         | 51.9                              | 3.4                                            | -53.0                                          | -836.0                                           | -449.0                             | 120.7                                                   | 1.0                                       | 416.0                                          | 76.4                                         | 120.0                                                   | 97.5                                               | 37.8                             | 208.0                                   | 105.6                                               | 1.7                             | 2.0                                         | 1.7                                                    | 0.7                                                    |
| 20–2                                  | 415.3                           | 201.0                                              | 2.2                             | 1.0                              | 2.1                                         | 54.4                              | 1.9                                            | -56.4                                          | -899.0                                           | -506.0                             | 124.7                                                   | -12.0                                     | 420.0                                          | 76.6                                         | 131.0                                                   | 96.1                                               | 39.9                             | 208.0                                   | 104.6                                               | 1.8                             | 2.1                                         | 1.3                                                    | 0.9                                                    |
| 20–3                                  | 400.3                           | 179.0                                              | 2.1                             | 0.2                              | 2.2                                         | 51.4                              | 2.2                                            | -53.9                                          | -764.0                                           | -449.0                             | 115.7                                                   | 0.0                                       | 396.0                                          | 71.3                                         | 121.0                                                   | 92.3                                               | 35.8                             | 201.0                                   | 98.6                                                | 2.0                             | 1.8                                         | 3.1                                                    | 0.8                                                    |
| <b>Mean</b>                           | <b>414.3</b>                    | <b>186.7</b>                                       | <b>2.2</b>                      | <b>0.5</b>                       | <b>2.3</b>                                  | <b>52.5</b>                       | <b>2.5</b>                                     | <b>-54.4</b>                                   | <b>-833.0</b>                                    | <b>-468.0</b>                      | <b>120.4</b>                                            | <b>-3.7</b>                               | <b>410.7</b>                                   | <b>74.7</b>                                  | <b>124.0</b>                                            | <b>95.3</b>                                        | <b>37.8</b>                      | <b>205.7</b>                            | <b>102.9</b>                                        | <b>1.9</b>                      | <b>2.0</b>                                  | <b>2.0</b>                                             | <b>0.8</b>                                             |
| <b>SD</b>                             | <b>11.05</b>                    | <b>10.14</b>                                       | <b>0.03</b>                     | <b>0.35</b>                      | <b>0.11</b>                                 | <b>1.31</b>                       | <b>0.65</b>                                    | <b>1.44</b>                                    | <b>55.15</b>                                     | <b>26.87</b>                       | <b>3.68</b>                                             | <b>5.91</b>                               | <b>10.50</b>                                   | <b>2.45</b>                                  | <b>4.97</b>                                             | <b>2.20</b>                                        | <b>1.67</b>                      | <b>3.30</b>                             | <b>3.09</b>                                         | <b>0.11</b>                     | <b>0.15</b>                                 | <b>0.79</b>                                            | <b>0.07</b>                                            |
| <b>%RSD</b>                           | <b>2.7</b>                      | <b>5.4</b>                                         | <b>1.2</b>                      | <b>63.8</b>                      | <b>4.94</b>                                 | <b>2.5</b>                        | <b>25.9</b>                                    | <b>-2.6</b>                                    | <b>-6.6</b>                                      | <b>-5.7</b>                        | <b>3.1</b>                                              | <b>-161.1</b>                             | <b>2.6</b>                                     | <b>3.3</b>                                   | <b>4.0</b>                                              | <b>2.3</b>                                         | <b>4.4</b>                       | <b>1.6</b>                              | <b>3.0</b>                                          | <b>5.7</b>                      | <b>7.4</b>                                  | <b>38.9</b>                                            | <b>8.6</b>                                             |

**Table S21a.** SIFT-MS LOQ data for Mix 2 in 10% DMI:90% water at three levels (1, 2, and 5).

| Level—Replicate<br>Number; Statistics | Acetone<br>(NO <sup>+</sup> 88) | Acetonitrile<br>(H <sub>3</sub> O <sup>+</sup> 42) | Benzene<br>(NO <sup>+</sup> 78) | Benzene<br>(NO <sup>+</sup> 108) | Benzene<br>(O <sub>2</sub> <sup>+</sup> 78) | 1-Butanol<br>(NO <sup>+</sup> 73) | Chloroform<br>(O <sub>2</sub> <sup>+</sup> 83) | Chloroform<br>(O <sub>2</sub> <sup>+</sup> 85) | Isooctane<br>(H <sub>3</sub> O <sup>+</sup> 113) | Isooctane<br>(NO <sup>+</sup> 113) | Isopropyl alcohol<br>(H <sub>3</sub> O <sup>+</sup> 43) | Isopropyl alcohol<br>(NO <sup>+</sup> 59) | Methanol<br>(H <sub>3</sub> O <sup>+</sup> 33) | Methyl ethyl ketone<br>(NO <sup>+</sup> 102) | Methyl ethyl ketone<br>(O <sub>2</sub> <sup>+</sup> 72) | Nitromethane<br>(H <sub>3</sub> O <sup>+</sup> 62) | Propanal<br>(NO <sup>+</sup> 57) | Tetrahydrofuran<br>(NO <sup>+</sup> 71) | Tetrahydrofuran<br>(O <sub>2</sub> <sup>+</sup> 71) | Toluene<br>(NO <sup>+</sup> 92) | Toluene<br>(O <sub>2</sub> <sup>+</sup> 92) | Trichloroethylene<br>(O <sub>2</sub> <sup>+</sup> 130) | Trichloroethylene<br>(O <sub>2</sub> <sup>+</sup> 132) |
|---------------------------------------|---------------------------------|----------------------------------------------------|---------------------------------|----------------------------------|---------------------------------------------|-----------------------------------|------------------------------------------------|------------------------------------------------|--------------------------------------------------|------------------------------------|---------------------------------------------------------|-------------------------------------------|------------------------------------------------|----------------------------------------------|---------------------------------------------------------|----------------------------------------------------|----------------------------------|-----------------------------------------|-----------------------------------------------------|---------------------------------|---------------------------------------------|--------------------------------------------------------|--------------------------------------------------------|
| 1–1                                   | 6.8                             | 8.5                                                | 123.7                           | 89.6                             | 133.6                                       | 2.8                               | 93.0                                           | 87.6                                           | 28.0                                             | 77.2                               | 4.1                                                     | 3.0                                       | 5.3                                            | 5.4                                          | 15.5                                                    | 3.9                                                | 74.4                             | 7.4                                     | 9.2                                                 | 126.6                           | 104.5                                       | 125.0                                                  | 119.4                                                  |
| 1–2                                   | 6.6                             | 10.0                                               | 128.7                           | 80.0                             | 126.6                                       | 3.9                               | 92.0                                           | 82.7                                           | 64.0                                             | 95.2                               | 3.2                                                     | 2.8                                       | 4.5                                            | 5.3                                          | 16.8                                                    | 4.6                                                | 85.4                             | 9.2                                     | 10.7                                                | 124.6                           | 108.5                                       | 134.0                                                  | 121.4                                                  |
| 1–3                                   | 7.8                             | 10.7                                               | 121.7                           | 88.8                             | 132.6                                       | 3.2                               | 87.9                                           | 84.6                                           | 50.0                                             | 82.2                               | 4.8                                                     | 2.7                                       | 5.5                                            | 4.9                                          | 16.8                                                    | 3.8                                                | 76.4                             | 8.7                                     | 9.2                                                 | 126.6                           | 110.5                                       | 121.0                                                  | 124.4                                                  |
| <b>Mean</b>                           | <b>7.1</b>                      | <b>9.7</b>                                         | <b>124.7</b>                    | <b>86.1</b>                      | <b>130.9</b>                                | <b>3.3</b>                        | <b>91.0</b>                                    | <b>85.0</b>                                    | <b>47.3</b>                                      | <b>84.9</b>                        | <b>4.0</b>                                              | <b>2.8</b>                                | <b>5.1</b>                                     | <b>5.2</b>                                   | <b>16.4</b>                                             | <b>4.1</b>                                         | <b>78.7</b>                      | <b>8.4</b>                              | <b>9.7</b>                                          | <b>126.0</b>                    | <b>107.8</b>                                | <b>126.7</b>                                           | <b>121.8</b>                                           |
| <b>SD</b>                             | <b>0.52</b>                     | <b>0.92</b>                                        | <b>2.94</b>                     | <b>4.35</b>                      | <b>3.09</b>                                 | <b>0.45</b>                       | <b>2.21</b>                                    | <b>2.02</b>                                    | <b>14.82</b>                                     | <b>7.59</b>                        | <b>0.65</b>                                             | <b>0.10</b>                               | <b>0.43</b>                                    | <b>0.21</b>                                  | <b>0.61</b>                                             | <b>0.36</b>                                        | <b>4.78</b>                      | <b>0.76</b>                             | <b>0.71</b>                                         | <b>0.94</b>                     | <b>2.49</b>                                 | <b>5.44</b>                                            | <b>2.05</b>                                            |
| <b>%RSD</b>                           | <b>7.4</b>                      | <b>9.4</b>                                         | <b>2.4</b>                      | <b>5.0</b>                       | <b>2.4</b>                                  | <b>13.6</b>                       | <b>2.4</b>                                     | <b>2.4</b>                                     | <b>31.3</b>                                      | <b>8.9</b>                         | <b>16.4</b>                                             | <b>3.5</b>                                | <b>8.5</b>                                     | <b>4.0</b>                                   | <b>3.7</b>                                              | <b>8.7</b>                                         | <b>6.1</b>                       | <b>9.0</b>                              | <b>7.3</b>                                          | <b>0.75</b>                     | <b>2.3</b>                                  | <b>4.3</b>                                             | <b>1.7</b>                                             |
| 2–1                                   | 12.0                            | 14.8                                               | 277.7                           | 191.7                            | 285.6                                       | 6.7                               | 194.0                                          | 169.6                                          | 191.0                                            | 183.2                              | 8.5                                                     | 5.6                                       | 5.3                                            | 10.7                                         | 25.6                                                    | 10.1                                               | 187.4                            | 21.2                                    | 15.5                                                | 280.6                           | 240.5                                       | 275.0                                                  | 256.4                                                  |
| 2–2                                   | 12.9                            | 15.4                                               | 291.7                           | 201.7                            | 291.6                                       | 5.4                               | 200.0                                          | 187.6                                          | 141.0                                            | 181.2                              | 9.7                                                     | 5.4                                       | 4.7                                            | 12.1                                         | 28.3                                                    | 9.1                                                | 194.4                            | 20.5                                    | 18.5                                                | 289.6                           | 236.5                                       | 284.0                                                  | 276.4                                                  |
| 2–3                                   | 14.0                            | 18.4                                               | 280.7                           | 175.7                            | 295.6                                       | 6.0                               | 200.0                                          | 178.6                                          | 124.0                                            | 178.2                              | 10.1                                                    | 4.7                                       | 6.5                                            | 11.0                                         | 23.1                                                    | 9.9                                                | 170.4                            | 21.6                                    | 18.9                                                | 278.6                           | 238.5                                       | 276.0                                                  | 265.4                                                  |
| <b>Mean</b>                           | <b>13.0</b>                     | <b>16.2</b>                                        | <b>283.4</b>                    | <b>189.7</b>                     | <b>290.9</b>                                | <b>6.1</b>                        | <b>198.0</b>                                   | <b>178.6</b>                                   | <b>152.0</b>                                     | <b>180.9</b>                       | <b>9.4</b>                                              | <b>5.2</b>                                | <b>5.5</b>                                     | <b>11.2</b>                                  | <b>25.7</b>                                             | <b>9.7</b>                                         | <b>184.1</b>                     | <b>21.1</b>                             | <b>17.6</b>                                         | <b>283.0</b>                    | <b>238.5</b>                                | <b>278.3</b>                                           | <b>266.1</b>                                           |
| <b>SD</b>                             | <b>0.82</b>                     | <b>1.57</b>                                        | <b>6.02</b>                     | <b>10.71</b>                     | <b>4.11</b>                                 | <b>0.52</b>                       | <b>2.83</b>                                    | <b>7.35</b>                                    | <b>28.44</b>                                     | <b>2.05</b>                        | <b>0.68</b>                                             | <b>0.39</b>                               | <b>0.75</b>                                    | <b>0.60</b>                                  | <b>2.12</b>                                             | <b>0.45</b>                                        | <b>10.08</b>                     | <b>0.45</b>                             | <b>1.52</b>                                         | <b>4.78</b>                     | <b>1.63</b>                                 | <b>4.03</b>                                            | <b>8.18</b>                                            |
| <b>%RSD</b>                           | <b>6.3</b>                      | <b>9.7</b>                                         | <b>2.1</b>                      | <b>5.6</b>                       | <b>1.4</b>                                  | <b>8.6</b>                        | <b>1.4</b>                                     | <b>4.1</b>                                     | <b>18.7</b>                                      | <b>1.1</b>                         | <b>7.2</b>                                              | <b>7.4</b>                                | <b>13.6</b>                                    | <b>5.4</b>                                   | <b>8.3</b>                                              | <b>4.6</b>                                         | <b>5.5</b>                       | <b>2.2</b>                              | <b>8.6</b>                                          | <b>1.7</b>                      | <b>0.68</b>                                 | <b>1.4</b>                                             | <b>3.1</b>                                             |
| 5–1                                   | 31.5                            | 23.0                                               | 751.7                           | 503.7                            | 787.6                                       | 13.7                              | 523.0                                          | 480.6                                          | 381.0                                            | 412.2                              | 16.9                                                    | 13.5                                      | 11.0                                           | 27.7                                         | 54.0                                                    | 21.7                                               | 398.4                            | 50.3                                    | 38.2                                                | 769.6                           | 650.5                                       | 764.0                                                  | 723.4                                                  |
| 5–2                                   | 26.5                            | 20.5                                               | 748.7                           | 512.7                            | 779.6                                       | 16.4                              | 513.0                                          | 461.6                                          | 441.0                                            | 495.2                              | 18.3                                                    | 12.8                                      | 11.4                                           | 30.0                                         | 60.1                                                    | 25.6                                               | 463.4                            | 55.8                                    | 38.5                                                | 771.6                           | 652.5                                       | 773.0                                                  | 767.4                                                  |
| 5–3                                   | 31.9                            | 23.6                                               | 736.7                           | 484.7                            | 762.6                                       | 14.2                              | 535.0                                          | 463.6                                          | 431.0                                            | 456.2                              | 17.1                                                    | 12.8                                      | 12.1                                           | 27.4                                         | 55.7                                                    | 24.3                                               | 426.4                            | 50.8                                    | 41.9                                                | 757.6                           | 640.5                                       | 774.0                                                  | 730.4                                                  |
| <b>Mean</b>                           | <b>30.0</b>                     | <b>22.4</b>                                        | <b>745.7</b>                    | <b>500.4</b>                     | <b>776.6</b>                                | <b>14.8</b>                       | <b>523.7</b>                                   | <b>468.6</b>                                   | <b>417.7</b>                                     | <b>454.5</b>                       | <b>17.4</b>                                             | <b>13.0</b>                               | <b>11.5</b>                                    | <b>28.3</b>                                  | <b>56.6</b>                                             | <b>23.9</b>                                        | <b>429.4</b>                     | <b>52.3</b>                             | <b>39.5</b>                                         | <b>766.3</b>                    | <b>647.8</b>                                | <b>770.3</b>                                           | <b>740.4</b>                                           |
| <b>SD</b>                             | <b>2.46</b>                     | <b>1.34</b>                                        | <b>6.48</b>                     | <b>11.67</b>                     | <b>10.42</b>                                | <b>1.17</b>                       | <b>8.99</b>                                    | <b>8.52</b>                                    | <b>26.25</b>                                     | <b>33.91</b>                       | <b>0.62</b>                                             | <b>0.33</b>                               | <b>0.45</b>                                    | <b>1.16</b>                                  | <b>2.57</b>                                             | <b>1.62</b>                                        | <b>26.62</b>                     | <b>2.48</b>                             | <b>1.68</b>                                         | <b>6.18</b>                     | <b>5.25</b>                                 | <b>4.50</b>                                            | <b>19.30</b>                                           |
| <b>%RSD</b>                           | <b>8.2</b>                      | <b>6.0</b>                                         | <b>0.87</b>                     | <b>2.3</b>                       | <b>1.3</b>                                  | <b>7.9</b>                        | <b>1.7</b>                                     | <b>1.8</b>                                     | <b>6.3</b>                                       | <b>7.5</b>                         | <b>3.6</b>                                              | <b>2.5</b>                                | <b>4.0</b>                                     | <b>4.1</b>                                   | <b>4.5</b>                                              | <b>6.8</b>                                         | <b>6.2</b>                       | <b>4.7</b>                              | <b>4.2</b>                                          | <b>0.81</b>                     | <b>0.81</b>                                 | <b>0.58</b>                                            | <b>2.6</b>                                             |

**Table S21b.** SIFT-MS LOQ data for Mix 2 in 100% DMI at three levels (1, 2, and 5).

| Level—Replicate<br>Number; Statistics | Acetone<br>(NO <sup>+</sup> 88) | Acetonitrile<br>(H <sub>3</sub> O <sup>+</sup> 42) | Benzene<br>(NO <sup>+</sup> 78) | Benzene<br>(NO <sup>+</sup> 108) | Benzene<br>(O <sub>2</sub> <sup>+</sup> 78) | 1-Butanol<br>(NO <sup>+</sup> 73) | Chloroform<br>(O <sub>2</sub> <sup>+</sup> 83) | Chloroform<br>(O <sub>2</sub> <sup>+</sup> 85) | Isooctane<br>(H <sub>3</sub> O <sup>+</sup> 113) | Isooctane<br>(NO <sup>+</sup> 113) | Isopropyl alcohol<br>(H <sub>3</sub> O <sup>+</sup> 43) | Isopropyl alcohol<br>(NO <sup>+</sup> 59) | Methanol<br>(H <sub>3</sub> O <sup>+</sup> 33) | Methyl ethyl ketone<br>(NO <sup>+</sup> 102) | Methyl ethyl ketone<br>(O <sub>2</sub> <sup>+</sup> 72) | Nitromethane<br>(H <sub>3</sub> O <sup>+</sup> 62) | Propanal<br>(NO <sup>+</sup> 57) | Tetrahydrofuran<br>(NO <sup>+</sup> 71) | Tetrahydrofuran<br>(O <sub>2</sub> <sup>+</sup> 71) | Toluene<br>(NO <sup>+</sup> 92) | Toluene<br>(O <sub>2</sub> <sup>+</sup> 92) | Trichloroethylene<br>(O <sub>2</sub> <sup>+</sup> 130) | Trichloroethylene<br>(O <sub>2</sub> <sup>+</sup> 132) |
|---------------------------------------|---------------------------------|----------------------------------------------------|---------------------------------|----------------------------------|---------------------------------------------|-----------------------------------|------------------------------------------------|------------------------------------------------|--------------------------------------------------|------------------------------------|---------------------------------------------------------|-------------------------------------------|------------------------------------------------|----------------------------------------------|---------------------------------------------------------|----------------------------------------------------|----------------------------------|-----------------------------------------|-----------------------------------------------------|---------------------------------|---------------------------------------------|--------------------------------------------------------|--------------------------------------------------------|
| 1–1                                   | 17.4                            | 10.0                                               | 6.2                             | 3.0                              | 8.8                                         | 1.3                               | 5.9                                            | 5.5                                            | -449.0                                           | -176.0                             | 6.2                                                     | -7.0                                      | 30.0                                           | 6.4                                          | 15.0                                                    | 4.1                                                | 16.9                             | 21.1                                    | 26.9                                                | 3.0                             | 2.7                                         | 2.9                                                    | 2.6                                                    |
| 1–2                                   | 15.1                            | 2.0                                                | 6.4                             | 2.3                              | 6.7                                         | 1.7                               | 4.7                                            | 7.8                                            | -340.0                                           | -112.0                             | 5.6                                                     | 0.0                                       | 31.0                                           | 6.0                                          | 17.0                                                    | 4.0                                                | 16.7                             | 19.9                                    | 23.9                                                | 2.9                             | 2.8                                         | 2.4                                                    | 3.6                                                    |
| 1–3                                   | 15.4                            | 4.0                                                | 7.1                             | 2.9                              | 8.2                                         | 1.8                               | 4.8                                            | 21.7                                           | -310.0                                           | -78.0                              | 5.2                                                     | -6.0                                      | 35.0                                           | 5.2                                          | 19.0                                                    | 4.5                                                | 16.7                             | 21.5                                    | 22.0                                                | 3.6                             | 2.6                                         | 3.3                                                    | 3.5                                                    |
| <b>Mean</b>                           | <b>16.0</b>                     | <b>5.3</b>                                         | <b>6.6</b>                      | <b>2.7</b>                       | <b>7.9</b>                                  | <b>1.6</b>                        | <b>5.1</b>                                     | <b>11.7</b>                                    | <b>-366.3</b>                                    | <b>-122.0</b>                      | <b>5.7</b>                                              | <b>-4.3</b>                               | <b>32.0</b>                                    | <b>5.8</b>                                   | <b>17.0</b>                                             | <b>4.2</b>                                         | <b>16.8</b>                      | <b>20.8</b>                             | <b>24.3</b>                                         | <b>3.2</b>                      | <b>2.7</b>                                  | <b>2.9</b>                                             | <b>3.2</b>                                             |
| <b>SD</b>                             | <b>1.02</b>                     | <b>3.40</b>                                        | <b>0.38</b>                     | <b>0.32</b>                      | <b>0.86</b>                                 | <b>0.21</b>                       | <b>0.57</b>                                    | <b>7.16</b>                                    | <b>59.72</b>                                     | <b>40.63</b>                       | <b>0.41</b>                                             | <b>3.09</b>                               | <b>2.16</b>                                    | <b>0.52</b>                                  | <b>1.63</b>                                             | <b>0.23</b>                                        | <b>0.09</b>                      | <b>0.68</b>                             | <b>2.02</b>                                         | <b>0.28</b>                     | <b>0.11</b>                                 | <b>0.38</b>                                            | <b>0.46</b>                                            |
| <b>%RSD</b>                           | <b>6.4</b>                      | <b>63.7</b>                                        | <b>5.8</b>                      | <b>11.8</b>                      | <b>10.9</b>                                 | <b>12.9</b>                       | <b>11.2</b>                                    | <b>61.3</b>                                    | <b>-16.3</b>                                     | <b>-33.3</b>                       | <b>7.3</b>                                              | <b>-71.3</b>                              | <b>6.8</b>                                     | <b>8.8</b>                                   | <b>9.6</b>                                              | <b>5.6</b>                                         | <b>0.6</b>                       | <b>3.3</b>                              | <b>8.3</b>                                          | <b>8.8</b>                      | <b>3.9</b>                                  | <b>13.0</b>                                            | <b>14.3</b>                                            |
| 2–1                                   | 34.7                            | 17.0                                               | 15.3                            | 10.8                             | 16.1                                        | 2.9                               | 8.6                                            | -6.4                                           | -605.0                                           | -178.0                             | 9.4                                                     | 4.0                                       | 46.0                                           | 12.6                                         | 37.0                                                    | 8.9                                                | 29.5                             | 35.5                                    | 31.9                                                | 8.6                             | 6.4                                         | 7.7                                                    | 5.5                                                    |
| 2–2                                   | 37.9                            | 14.0                                               | 15.4                            | 10.0                             | 16.6                                        | 3.4                               | 4.2                                            | 2.3                                            | -469.0                                           | -134.0                             | 9.7                                                     | 18.0                                      | 47.0                                           | 14.6                                         | 38.0                                                    | 9.7                                                | 33.7                             | 35.7                                    | 36.9                                                | 7.6                             | 6.3                                         | 6.1                                                    | 6.4                                                    |
| 2–3                                   | 38.9                            | 21.0                                               | 18.6                            | 12.5                             | 15.6                                        | 2.4                               | 6.0                                            | 31.1                                           | -210.0                                           | 43.0                               | 8.6                                                     | 31.0                                      | 43.0                                           | 12.1                                         | 36.0                                                    | 8.4                                                | 30.3                             | 39.1                                    | 33.9                                                | 7.8                             | 6.0                                         | 5.7                                                    | 6.0                                                    |
| <b>Mean</b>                           | <b>37.2</b>                     | <b>17.3</b>                                        | <b>16.5</b>                     | <b>11.1</b>                      | <b>16.1</b>                                 | <b>2.9</b>                        | <b>6.3</b>                                     | <b>9.0</b>                                     | <b>-428.0</b>                                    | <b>-89.7</b>                       | <b>9.2</b>                                              | <b>17.7</b>                               | <b>45.3</b>                                    | <b>13.1</b>                                  | <b>37.0</b>                                             | <b>9.0</b>                                         | <b>31.2</b>                      | <b>36.8</b>                             | <b>34.2</b>                                         | <b>8.0</b>                      | <b>6.2</b>                                  | <b>6.5</b>                                             | <b>6.0</b>                                             |
| <b>SD</b>                             | <b>1.79</b>                     | <b>2.87</b>                                        | <b>1.53</b>                     | <b>1.04</b>                      | <b>0.41</b>                                 | <b>0.41</b>                       | <b>1.83</b>                                    | <b>16.03</b>                                   | <b>163.84</b>                                    | <b>95.51</b>                       | <b>0.46</b>                                             | <b>11.03</b>                              | <b>1.70</b>                                    | <b>1.08</b>                                  | <b>0.82</b>                                             | <b>0.53</b>                                        | <b>1.82</b>                      | <b>1.65</b>                             | <b>2.05</b>                                         | <b>0.41</b>                     | <b>0.16</b>                                 | <b>0.85</b>                                            | <b>0.36</b>                                            |
| <b>%RSD</b>                           | <b>4.8</b>                      | <b>16.5</b>                                        | <b>9.3</b>                      | <b>9.4</b>                       | <b>2.5</b>                                  | <b>14.2</b>                       | <b>29.1</b>                                    | <b>178.1</b>                                   | <b>-38.3</b>                                     | <b>-106.5</b>                      | <b>5.0</b>                                              | <b>62.4</b>                               | <b>3.7</b>                                     | <b>8.3</b>                                   | <b>2.2</b>                                              | <b>5.9</b>                                         | <b>5.8</b>                       | <b>4.5</b>                              | <b>6.0</b>                                          | <b>5.1</b>                      | <b>2.6</b>                                  | <b>13.2</b>                                            | <b>6.1</b>                                             |
| 5–1                                   | 89.4                            | 38.0                                               | 46.6                            | 29.0                             | 48.5                                        | 6.1                               | 14.3                                           | -8.0                                           | -702.0                                           | -246.0                             | 23.9                                                    | 8.0                                       | 74.0                                           | 34.9                                         | 58.0                                                    | 21.6                                               | 82.2                             | 93.3                                    | 47.9                                                | 20.3                            | 19.1                                        | 19.4                                                   | 21.8                                                   |
| 5–2                                   | 83.4                            | 48.0                                               | 43.4                            | 31.2                             | 48.3                                        | 5.9                               | 14.1                                           | -1.3                                           | -655.0                                           | -165.0                             | 21.2                                                    | 20.0                                      | 64.0                                           | 36.7                                         | 58.0                                                    | 20.2                                               | 83.2                             | 92.3                                    | 47.9                                                | 22.1                            | 16.2                                        | 21.8                                                   | 20.8                                                   |
| 5–3                                   | 90.4                            | 42.0                                               | 47.2                            | 30.0                             | 48.5                                        | 5.5                               | 12.6                                           | -6.8                                           | -700.0                                           | -221.0                             | 20.0                                                    | 11.0                                      | 62.0                                           | 34.4                                         | 68.0                                                    | 21.2                                               | 78.2                             | 96.3                                    | 44.9                                                | 19.6                            | 18.1                                        | 21.6                                                   | 20.0                                                   |
| <b>Mean</b>                           | <b>87.7</b>                     | <b>42.7</b>                                        | <b>45.8</b>                     | <b>30.0</b>                      | <b>48.4</b>                                 | <b>5.8</b>                        | <b>13.7</b>                                    | <b>-5.4</b>                                    | <b>-685.7</b>                                    | <b>-210.7</b>                      | <b>21.7</b>                                             | <b>13.0</b>                               | <b>66.7</b>                                    | <b>35.3</b>                                  | <b>61.3</b>                                             | <b>21.0</b>                                        | <b>81.2</b>                      | <b>94.0</b>                             | <b>46.9</b>                                         | <b>20.7</b>                     | <b>17.8</b>                                 | <b>20.9</b>                                            | <b>20.8</b>                                            |
| <b>SD</b>                             | <b>3.09</b>                     | <b>4.11</b>                                        | <b>1.67</b>                     | <b>0.90</b>                      | <b>0.09</b>                                 | <b>0.25</b>                       | <b>0.76</b>                                    | <b>2.92</b>                                    | <b>21.70</b>                                     | <b>33.87</b>                       | <b>1.63</b>                                             | <b>5.10</b>                               | <b>5.25</b>                                    | <b>0.99</b>                                  | <b>4.71</b>                                             | <b>0.59</b>                                        | <b>2.16</b>                      | <b>1.70</b>                             | <b>1.41</b>                                         | <b>1.05</b>                     | <b>1.20</b>                                 | <b>1.09</b>                                            | <b>0.74</b>                                            |
| <b>%RSD</b>                           | <b>3.5</b>                      | <b>9.6</b>                                         | <b>3.6</b>                      | <b>3.0</b>                       | <b>0.19</b>                                 | <b>4.3</b>                        | <b>5.5</b>                                     | <b>-54.4</b>                                   | <b>-3.2</b>                                      | <b>-16.1</b>                       | <b>7.5</b>                                              | <b>39.2</b>                               | <b>7.9</b>                                     | <b>2.8</b>                                   | <b>7.7</b>                                              | <b>2.8</b>                                         | <b>2.7</b>                       | <b>1.8</b>                              | <b>3.0</b>                                          | <b>5.1</b>                      | <b>6.8</b>                                  | <b>5.2</b>                                             | <b>3.5</b>                                             |

## E. Recovery

**Table S22a.** SIFT-MS recovery data for Mix 1 spiked into aspirin dissolved in 5% DMI:95% water at 25, 50, and 100% of 500 level.

| Level—Replicate<br>Number; Statistics | Acetone<br>(NO <sup>+</sup> 88) | Acetonitrile<br>(H <sub>3</sub> O <sup>+</sup> 42) | Benzene<br>(NO <sup>+</sup> 78) | Benzene<br>(NO <sup>+</sup> 108) | Benzene<br>(O <sub>2</sub> <sup>+</sup> 78) | 1-Butanol<br>(NO <sup>+</sup> 73) | Chloroform<br>(O <sub>2</sub> <sup>+</sup> 83) | Chloroform<br>(O <sub>2</sub> <sup>+</sup> 85) | Isooctane<br>(H <sub>3</sub> O <sup>+</sup> 113) | Isooctane<br>(NO <sup>+</sup> 113) | Isopropyl alcohol<br>(H <sub>3</sub> O <sup>+</sup> 43) | Isopropyl alcohol<br>(NO <sup>+</sup> 59) | Methanol<br>(H <sub>3</sub> O <sup>+</sup> 33) | Methyl ethyl ketone<br>(NO <sup>+</sup> 102) | Methyl ethyl ketone<br>(O <sub>2</sub> <sup>+</sup> 72) | Nitromethane<br>(H <sub>3</sub> O <sup>+</sup> 62) | Propanal<br>(NO <sup>+</sup> 57) | Tetrahydrofuran<br>(NO <sup>+</sup> 71) | Tetrahydrofuran<br>(O <sub>2</sub> <sup>+</sup> 71) | Toluene<br>(NO <sup>+</sup> 92) | Toluene<br>(O <sub>2</sub> <sup>+</sup> 92) | Trichloroethylene<br>(O <sub>2</sub> <sup>+</sup> 130) | Trichloroethylene<br>(O <sub>2</sub> <sup>+</sup> 132) |
|---------------------------------------|---------------------------------|----------------------------------------------------|---------------------------------|----------------------------------|---------------------------------------------|-----------------------------------|------------------------------------------------|------------------------------------------------|--------------------------------------------------|------------------------------------|---------------------------------------------------------|-------------------------------------------|------------------------------------------------|----------------------------------------------|---------------------------------------------------------|----------------------------------------------------|----------------------------------|-----------------------------------------|-----------------------------------------------------|---------------------------------|---------------------------------------------|--------------------------------------------------------|--------------------------------------------------------|
| 125–1                                 | 97.7                            | 100.2                                              | 109.1                           | 109.6                            | 109.0                                       | 98.4                              | 106.6                                          | 107.2                                          | 130.9                                            | 109.6                              | 102.2                                                   | 97.1                                      | 96.4                                           | 98.2                                         | 97.1                                                    | 102.7                                              | 104.9                            | 96.9                                    | 99.0                                                | 109.6                           | 104.1                                       | 111.8                                                  | 108.6                                                  |
| 125–2                                 | 99.4                            | 104.0                                              | 111.2                           | 118.3                            | 111.4                                       | 106.5                             | 108.6                                          | 106.7                                          | 116.5                                            | 104.7                              | 106.4                                                   | 103.5                                     | 103.6                                          | 102.6                                        | 105.4                                                   | 107.2                                              | 103.8                            | 104.0                                   | 99.6                                                | 106.5                           | 109.8                                       | 111.5                                                  | 110.0                                                  |
| 125–3                                 | 101.3                           | 101.9                                              | 112.0                           | 107.7                            | 109.8                                       | 103.1                             | 109.9                                          | 107.9                                          | 117.9                                            | 101.7                              | 105.1                                                   | 99.4                                      | 100.0                                          | 97.9                                         | 104.0                                                   | 103.8                                              | 106.4                            | 101.5                                   | 97.0                                                | 109.9                           | 109.0                                       | 113.8                                                  | 107.7                                                  |
| <b>Mean</b>                           | <b>99.5</b>                     | <b>102.0</b>                                       | <b>110.8</b>                    | <b>111.9</b>                     | <b>110.1</b>                                | <b>102.6</b>                      | <b>108.4</b>                                   | <b>107.3</b>                                   | <b>121.8</b>                                     | <b>105.3</b>                       | <b>104.5</b>                                            | <b>100.0</b>                              | <b>100.0</b>                                   | <b>99.6</b>                                  | <b>102.2</b>                                            | <b>104.6</b>                                       | <b>105.1</b>                     | <b>100.8</b>                            | <b>98.5</b>                                         | <b>108.7</b>                    | <b>107.7</b>                                | <b>112.4</b>                                           | <b>108.8</b>                                           |
| <b>SD</b>                             | <b>1.48</b>                     | <b>1.53</b>                                        | <b>1.24</b>                     | <b>4.62</b>                      | <b>0.98</b>                                 | <b>3.31</b>                       | <b>1.37</b>                                    | <b>0.51</b>                                    | <b>6.50</b>                                      | <b>3.25</b>                        | <b>1.74</b>                                             | <b>2.65</b>                               | <b>2.96</b>                                    | <b>2.17</b>                                  | <b>3.64</b>                                             | <b>1.93</b>                                        | <b>1.04</b>                      | <b>2.92</b>                             | <b>1.13</b>                                         | <b>1.55</b>                     | <b>2.54</b>                                 | <b>1.05</b>                                            | <b>0.98</b>                                            |
| <b>%RSD</b>                           | <b>1.5</b>                      | <b>1.5</b>                                         | <b>1.1</b>                      | <b>4.1</b>                       | <b>0.89</b>                                 | <b>3.2</b>                        | <b>1.3</b>                                     | <b>0.47</b>                                    | <b>5.3</b>                                       | <b>3.1</b>                         | <b>1.7</b>                                              | <b>2.7</b>                                | <b>3.0</b>                                     | <b>2.2</b>                                   | <b>3.6</b>                                              | <b>1.8</b>                                         | <b>0.99</b>                      | <b>2.9</b>                              | <b>1.1</b>                                          | <b>1.4</b>                      | <b>2.4</b>                                  | <b>0.93</b>                                            | <b>0.90</b>                                            |
| 250–1                                 | 99.8                            | 103.1                                              | 109.8                           | 106.5                            | 111.7                                       | 100.1                             | 108.9                                          | 107.3                                          | 126.2                                            | 107.8                              | 103.3                                                   | 100.6                                     | 102.7                                          | 99.6                                         | 100.8                                                   | 102.5                                              | 107.0                            | 103.0                                   | 101.6                                               | 107.6                           | 110.6                                       | 112.8                                                  | 108.5                                                  |
| 250–2                                 | 99.8                            | 101.5                                              | 108.7                           | 111.2                            | 108.1                                       | 102.3                             | 106.3                                          | 107.3                                          | 121.1                                            | 103.6                              | 106.0                                                   | 100.8                                     | 98.0                                           | 101.4                                        | 99.3                                                    | 106.7                                              | 104.3                            | 101.5                                   | 101.2                                               | 106.6                           | 110.2                                       | 111.6                                                  | 107.1                                                  |
| 250–3                                 | 101.7                           | 102.3                                              | 109.1                           | 109.4                            | 107.9                                       | 99.3                              | 106.9                                          | 108.7                                          | 116.0                                            | 103.6                              | 100.6                                                   | 98.1                                      | 99.7                                           | 100.8                                        | 100.0                                                   | 99.1                                               | 105.7                            | 100.0                                   | 101.1                                               | 106.6                           | 108.6                                       | 111.9                                                  | 107.5                                                  |
| <b>Mean</b>                           | <b>100.4</b>                    | <b>102.3</b>                                       | <b>109.2</b>                    | <b>109.0</b>                     | <b>109.2</b>                                | <b>100.5</b>                      | <b>107.4</b>                                   | <b>107.7</b>                                   | <b>121.1</b>                                     | <b>105.0</b>                       | <b>103.3</b>                                            | <b>99.8</b>                               | <b>100.1</b>                                   | <b>100.6</b>                                 | <b>100.0</b>                                            | <b>102.8</b>                                       | <b>105.7</b>                     | <b>101.5</b>                            | <b>101.3</b>                                        | <b>106.9</b>                    | <b>109.8</b>                                | <b>112.1</b>                                           | <b>107.7</b>                                           |
| <b>SD</b>                             | <b>0.88</b>                     | <b>0.66</b>                                        | <b>0.43</b>                     | <b>1.92</b>                      | <b>1.72</b>                                 | <b>1.25</b>                       | <b>1.09</b>                                    | <b>0.65</b>                                    | <b>4.13</b>                                      | <b>1.97</b>                        | <b>2.24</b>                                             | <b>1.24</b>                               | <b>1.96</b>                                    | <b>0.76</b>                                  | <b>0.63</b>                                             | <b>3.10</b>                                        | <b>1.09</b>                      | <b>1.20</b>                             | <b>0.19</b>                                         | <b>0.49</b>                     | <b>0.89</b>                                 | <b>0.50</b>                                            | <b>0.62</b>                                            |
| <b>%RSD</b>                           | <b>0.88</b>                     | <b>0.65</b>                                        | <b>0.40</b>                     | <b>1.8</b>                       | <b>1.6</b>                                  | <b>1.2</b>                        | <b>1.0</b>                                     | <b>0.60</b>                                    | <b>3.4</b>                                       | <b>1.9</b>                         | <b>2.2</b>                                              | <b>1.2</b>                                | <b>2.0</b>                                     | <b>0.75</b>                                  | <b>0.63</b>                                             | <b>3.0</b>                                         | <b>1.0</b>                       | <b>1.2</b>                              | <b>0.19</b>                                         | <b>0.46</b>                     | <b>0.81</b>                                 | <b>0.45</b>                                            | <b>0.58</b>                                            |
| 500–1                                 | 97.3                            | 100.7                                              | 105.2                           | 107.4                            | 105.2                                       | 98.0                              | 103.0                                          | 103.4                                          | 121.6                                            | 95.4                               | 101.4                                                   | 98.5                                      | 95.2                                           | 97.9                                         | 101.2                                                   | 101.8                                              | 98.4                             | 98.8                                    | 102.1                                               | 102.9                           | 105.3                                       | 105.7                                                  | 104.3                                                  |
| 500–2                                 | 99.5                            | 101.9                                              | 103.9                           | 102.1                            | 105.2                                       | 98.8                              | 103.0                                          | 104.4                                          | 115.5                                            | 98.7                               | 100.1                                                   | 99.8                                      | 97.7                                           | 98.6                                         | 99.7                                                    | 100.5                                              | 99.1                             | 100.3                                   | 103.8                                               | 101.2                           | 108.4                                       | 103.5                                                  | 105.0                                                  |
| 500–3                                 | 98.2                            | 101.5                                              | 104.2                           | 100.5                            | 103.2                                       | 98.0                              | 103.3                                          | 103.0                                          | 118.7                                            | 95.4                               | 102.0                                                   | 97.8                                      | 95.7                                           | 98.6                                         | 98.5                                                    | 103.4                                              | 96.7                             | 98.8                                    | 99.9                                                | 102.1                           | 108.4                                       | 102.8                                                  | 102.1                                                  |
| <b>Mean</b>                           | <b>98.3</b>                     | <b>101.4</b>                                       | <b>104.4</b>                    | <b>103.3</b>                     | <b>104.5</b>                                | <b>98.3</b>                       | <b>103.1</b>                                   | <b>103.6</b>                                   | <b>118.6</b>                                     | <b>96.5</b>                        | <b>101.2</b>                                            | <b>98.7</b>                               | <b>96.2</b>                                    | <b>98.4</b>                                  | <b>99.8</b>                                             | <b>101.9</b>                                       | <b>98.1</b>                      | <b>99.3</b>                             | <b>101.9</b>                                        | <b>102.1</b>                    | <b>107.3</b>                                | <b>104.0</b>                                           | <b>103.8</b>                                           |
| <b>SD</b>                             | <b>0.89</b>                     | <b>0.51</b>                                        | <b>0.54</b>                     | <b>2.94</b>                      | <b>0.93</b>                                 | <b>0.35</b>                       | <b>0.15</b>                                    | <b>0.59</b>                                    | <b>2.51</b>                                      | <b>1.55</b>                        | <b>0.81</b>                                             | <b>0.80</b>                               | <b>1.09</b>                                    | <b>0.33</b>                                  | <b>1.10</b>                                             | <b>1.21</b>                                        | <b>0.99</b>                      | <b>0.69</b>                             | <b>1.59</b>                                         | <b>0.70</b>                     | <b>1.45</b>                                 | <b>1.25</b>                                            | <b>1.26</b>                                            |
| <b>%RSD</b>                           | <b>0.91</b>                     | <b>0.50</b>                                        | <b>0.51</b>                     | <b>2.8</b>                       | <b>0.89</b>                                 | <b>0.35</b>                       | <b>0.15</b>                                    | <b>0.57</b>                                    | <b>2.1</b>                                       | <b>1.6</b>                         | <b>0.80</b>                                             | <b>0.81</b>                               | <b>1.1</b>                                     | <b>0.33</b>                                  | <b>1.1</b>                                              | <b>1.2</b>                                         | <b>1.0</b>                       | <b>0.70</b>                             | <b>1.6</b>                                          | <b>0.69</b>                     | <b>1.4</b>                                  | <b>1.2</b>                                             | <b>1.2</b>                                             |

**Table S22b.** SIFT-MS recovery data for Mix 1 spiked into aspirin dissolved in 100% DMI at 25, 50, and 100% of 500 level.

| Level—Replicate<br>Number; Statistics | Acetone<br>(NO <sup>+</sup> 88) | Acetonitrile<br>(H <sub>3</sub> O <sup>+</sup> 42) | Benzene<br>(NO <sup>+</sup> 78) | Benzene<br>(NO <sup>+</sup> 108) | Benzene<br>(O <sub>2</sub> <sup>+</sup> 78) | 1-Butanol<br>(NO <sup>+</sup> 73) | Chloroform<br>(O <sub>2</sub> <sup>+</sup> 83) | Chloroform<br>(O <sub>2</sub> <sup>+</sup> 85) | Isooctane<br>(H <sub>3</sub> O <sup>+</sup> 113) | Isooctane<br>(NO <sup>+</sup> 113) | Isopropyl alcohol<br>(H <sub>3</sub> O <sup>+</sup> 43) | Isopropyl alcohol<br>(NO <sup>+</sup> 59) | Methanol<br>(H <sub>3</sub> O <sup>+</sup> 33) | Methyl ethyl ketone<br>(NO <sup>+</sup> 102) | Methyl ethyl ketone<br>(O <sub>2</sub> <sup>+</sup> 72) | Nitromethane<br>(H <sub>3</sub> O <sup>+</sup> 62) | Propanal<br>(NO <sup>+</sup> 57) | Tetrahydrofuran<br>(NO <sup>+</sup> 71) | Tetrahydrofuran<br>(O <sub>2</sub> <sup>+</sup> 71) | Toluene<br>(NO <sup>+</sup> 92) | Toluene<br>(O <sub>2</sub> <sup>+</sup> 92) | Trichloroethylene<br>(O <sub>2</sub> <sup>+</sup> 130) | Trichloroethylene<br>(O <sub>2</sub> <sup>+</sup> 132) |
|---------------------------------------|---------------------------------|----------------------------------------------------|---------------------------------|----------------------------------|---------------------------------------------|-----------------------------------|------------------------------------------------|------------------------------------------------|--------------------------------------------------|------------------------------------|---------------------------------------------------------|-------------------------------------------|------------------------------------------------|----------------------------------------------|---------------------------------------------------------|----------------------------------------------------|----------------------------------|-----------------------------------------|-----------------------------------------------------|---------------------------------|---------------------------------------------|--------------------------------------------------------|--------------------------------------------------------|
| 125–1                                 | 105.1                           | 110.6                                              | 134.3                           | 53.9                             | 134.7                                       | 112.5                             | 112.9                                          | 100.1                                          | -12.5                                            | 64.9                               | 159.0                                                   | 142.8                                     | 99.3                                           | 103.6                                        | 107.1                                                   | 117.7                                              | 113.1                            | 100.1                                   | 111.4                                               | 131.0                           | 232.3                                       | 106.8                                                  | 115.1                                                  |
| 125–2                                 | 94.0                            | 201.9                                              | 87.0                            | -33.2                            | 71.2                                        | 98.1                              | 85.7                                           | 220.2                                          | 243.5                                            | 330.1                              | 92.4                                                    | 789.2                                     | 92.9                                           | 93.2                                         | 98.1                                                    | 102.8                                              | 108.0                            | 91.4                                    | 80.9                                                | 52.4                            | 84.3                                        | 75.7                                                   | 5.7                                                    |
| 125–3                                 | 107.9                           | 102.4                                              | 100.3                           | -12.6                            | 148.2                                       | 110.4                             | 80.6                                           | 54.4                                           | 20.4                                             | 112.7                              | 185.9                                                   | 94.1                                      | 93.5                                           | 104.1                                        | 103.9                                                   | 111.2                                              | 116.9                            | 103.3                                   | 104.0                                               | 157.2                           | 178.5                                       | 183.1                                                  | 105.2                                                  |
| <b>Mean</b>                           | <b>102.3</b>                    | <b>138.3</b>                                       | <b>107.2</b>                    | <b>2.7</b>                       | <b>118.1</b>                                | <b>107.0</b>                      | <b>93.0</b>                                    | <b>124.9</b>                                   | <b>83.8</b>                                      | <b>169.2</b>                       | <b>145.8</b>                                            | <b>342.0</b>                              | <b>95.2</b>                                    | <b>100.3</b>                                 | <b>103.0</b>                                            | <b>110.6</b>                                       | <b>112.6</b>                     | <b>98.3</b>                             | <b>98.8</b>                                         | <b>113.5</b>                    | <b>165.0</b>                                | <b>121.9</b>                                           | <b>75.3</b>                                            |
| <b>SD</b>                             | <b>6.0</b>                      | <b>45.1</b>                                        | <b>19.9</b>                     | <b>37.2</b>                      | <b>33.6</b>                                 | <b>6.3</b>                        | <b>14.2</b>                                    | <b>69.9</b>                                    | <b>113.8</b>                                     | <b>115.4</b>                       | <b>39.3</b>                                             | <b>316.8</b>                              | <b>2.9</b>                                     | <b>5.0</b>                                   | <b>3.7</b>                                              | <b>6.1</b>                                         | <b>3.7</b>                       | <b>5.0</b>                              | <b>13.0</b>                                         | <b>44.5</b>                     | <b>61.2</b>                                 | <b>45.1</b>                                            | <b>49.4</b>                                            |
| <b>%RSD</b>                           | <b>5.9</b>                      | <b>32.6</b>                                        | <b>18.6</b>                     | <b>1358.1</b>                    | <b>28.4</b>                                 | <b>5.9</b>                        | <b>15.3</b>                                    | <b>56.0</b>                                    | <b>135.8</b>                                     | <b>68.2</b>                        | <b>27.0</b>                                             | <b>92.6</b>                               | <b>3.0</b>                                     | <b>5.0</b>                                   | <b>3.6</b>                                              | <b>5.5</b>                                         | <b>3.3</b>                       | <b>5.1</b>                              | <b>13.1</b>                                         | <b>39.2</b>                     | <b>37.1</b>                                 | <b>37.0</b>                                            | <b>65.5</b>                                            |
| 250–1                                 | 104.3                           | 109.7                                              | 93.9                            | 68.0                             | 171.8                                       | 108.9                             | 205.0                                          | 94.1                                           | 134.5                                            | 171.9                              | 119.9                                                   | 134.2                                     | 102.8                                          | 105.0                                        | 101.4                                                   | 111.8                                              | 115.6                            | 105.6                                   | 100.0                                               | 153.0                           | 214.6                                       | 88.4                                                   | 129.8                                                  |
| 250–2                                 | 106.4                           | 110.0                                              | 182.2                           | 63.9                             | 132.9                                       | 111.6                             | 209.2                                          | 116.2                                          | 178.6                                            | 209.6                              | 110.6                                                   | 133.7                                     | 103.6                                          | 103.7                                        | 100.2                                                   | 110.4                                              | 119.8                            | 105.1                                   | 97.4                                                | 127.2                           | 175.9                                       | 144.2                                                  | 112.2                                                  |
| 250–3                                 | 102.3                           | 110.0                                              | 88.9                            | 106.3                            | 158.2                                       | 107.1                             | 162.4                                          | 128.3                                          | 164.1                                            | 194.6                              | 109.6                                                   | 134.2                                     | 106.0                                          | 105.7                                        | 104.9                                                   | 108.5                                              | 113.4                            | 102.6                                   | 93.3                                                | 121.2                           | 186.0                                       | 78.5                                                   | 74.8                                                   |
| <b>Mean</b>                           | <b>104.3</b>                    | <b>109.9</b>                                       | <b>121.7</b>                    | <b>79.4</b>                      | <b>154.3</b>                                | <b>109.2</b>                      | <b>192.2</b>                                   | <b>112.9</b>                                   | <b>159.0</b>                                     | <b>192.0</b>                       | <b>113.4</b>                                            | <b>134.0</b>                              | <b>104.1</b>                                   | <b>104.8</b>                                 | <b>102.2</b>                                            | <b>110.2</b>                                       | <b>116.3</b>                     | <b>104.4</b>                            | <b>96.9</b>                                         | <b>133.8</b>                    | <b>192.1</b>                                | <b>103.7</b>                                           | <b>105.6</b>                                           |
| <b>SD</b>                             | <b>1.7</b>                      | <b>0.19</b>                                        | <b>42.8</b>                     | <b>19.1</b>                      | <b>16.1</b>                                 | <b>1.9</b>                        | <b>21.1</b>                                    | <b>14.1</b>                                    | <b>18.4</b>                                      | <b>15.5</b>                        | <b>4.6</b>                                              | <b>0.27</b>                               | <b>1.4</b>                                     | <b>0.82</b>                                  | <b>2.0</b>                                              | <b>1.3</b>                                         | <b>2.7</b>                       | <b>1.3</b>                              | <b>2.8</b>                                          | <b>13.8</b>                     | <b>16.4</b>                                 | <b>28.9</b>                                            | <b>23.0</b>                                            |
| <b>%RSD</b>                           | <b>1.6</b>                      | <b>0.17</b>                                        | <b>35.2</b>                     | <b>24.1</b>                      | <b>10.4</b>                                 | <b>1.7</b>                        | <b>11.0</b>                                    | <b>12.5</b>                                    | <b>11.6</b>                                      | <b>8.1</b>                         | <b>4.1</b>                                              | <b>0.20</b>                               | <b>1.3</b>                                     | <b>0.78</b>                                  | <b>2.0</b>                                              | <b>1.2</b>                                         | <b>2.3</b>                       | <b>1.3</b>                              | <b>2.8</b>                                          | <b>10.3</b>                     | <b>8.5</b>                                  | <b>27.9</b>                                            | <b>21.7</b>                                            |
| 500–1                                 | 103.2                           | 111.6                                              | 140.5                           | 82.9                             | 150.7                                       | 110.2                             | 257.8                                          | 58.9                                           | 105.5                                            | 131.2                              | 106.7                                                   | 154.3                                     | 97.3                                           | 111.4                                        | 103.9                                                   | 109.5                                              | 115.3                            | 105.5                                   | 103.2                                               | 148.0                           | 198.9                                       | 105.3                                                  | 131.6                                                  |
| 500–2                                 | 102.7                           | 111.6                                              | 146.8                           | 92.0                             | 158.2                                       | 111.6                             | 321.6                                          | 62.6                                           | 101.5                                            | 124.3                              | 107.7                                                   | 156.5                                     | 98.9                                           | 111.8                                        | 103.4                                                   | 108.6                                              | 115.3                            | 105.0                                   | 102.6                                               | 161.4                           | 145.5                                       | 111.5                                                  | 96.5                                                   |
| 500–3                                 | 102.7                           | 112.6                                              | 97.2                            | 67.5                             | 152.4                                       | 112.9                             | 353.5                                          | 54.2                                           | 93.0                                             | 102.6                              | 104.2                                                   | 157.4                                     | 99.7                                           | 108.8                                        | 105.0                                                   | 108.6                                              | 116.4                            | 104.2                                   | 102.8                                               | 184.5                           | 206.1                                       | 140.1                                                  | 111.4                                                  |
| <b>Mean</b>                           | <b>102.8</b>                    | <b>112.0</b>                                       | <b>128.2</b>                    | <b>80.8</b>                      | <b>153.8</b>                                | <b>111.6</b>                      | <b>311.0</b>                                   | <b>58.6</b>                                    | <b>100.0</b>                                     | <b>119.4</b>                       | <b>106.2</b>                                            | <b>156.1</b>                              | <b>98.6</b>                                    | <b>110.7</b>                                 | <b>104.1</b>                                            | <b>108.9</b>                                       | <b>115.7</b>                     | <b>104.9</b>                            | <b>102.9</b>                                        | <b>164.6</b>                    | <b>183.5</b>                                | <b>119.0</b>                                           | <b>113.2</b>                                           |
| <b>SD</b>                             | <b>0.24</b>                     | <b>0.47</b>                                        | <b>22.1</b>                     | <b>10.1</b>                      | <b>3.2</b>                                  | <b>1.1</b>                        | <b>39.8</b>                                    | <b>3.4</b>                                     | <b>5.2</b>                                       | <b>12.2</b>                        | <b>1.5</b>                                              | <b>1.3</b>                                | <b>1.0</b>                                     | <b>1.3</b>                                   | <b>0.67</b>                                             | <b>0.44</b>                                        | <b>0.50</b>                      | <b>0.52</b>                             | <b>0.23</b>                                         | <b>15.1</b>                     | <b>27.0</b>                                 | <b>15.2</b>                                            | <b>14.4</b>                                            |
| <b>%RSD</b>                           | <b>0.23</b>                     | <b>0.42</b>                                        | <b>17.2</b>                     | <b>12.5</b>                      | <b>2.1</b>                                  | <b>0.99</b>                       | <b>12.8</b>                                    | <b>5.9</b>                                     | <b>5.2</b>                                       | <b>10.2</b>                        | <b>1.4</b>                                              | <b>0.84</b>                               | <b>1.0</b>                                     | <b>1.2</b>                                   | <b>0.64</b>                                             | <b>0.41</b>                                        | <b>0.43</b>                      | <b>0.50</b>                             | <b>0.23</b>                                         | <b>9.2</b>                      | <b>14.7</b>                                 | <b>12.7</b>                                            | <b>12.7</b>                                            |

**Table S23.** SIFT-MS recovery data for Mix 2 spiked into aspirin dissolved in 100% DMI at 25, 50, and 100% of 500 level.

| Level—Replicate<br>Number; Statistics | Acetone<br>(NO <sup>+</sup> 88) | Acetonitrile<br>(H <sub>3</sub> O <sup>+</sup> 42) | Benzene<br>(NO <sup>+</sup> 78) | Benzene<br>(NO <sup>+</sup> 108) | Benzene<br>(O <sub>2</sub> <sup>+</sup> 78) | 1-Butanol<br>(NO <sup>+</sup> 73) | Chloroform<br>(O <sub>2</sub> <sup>+</sup> 83) | Chloroform<br>(O <sub>2</sub> <sup>+</sup> 85) | Isooctane<br>(H <sub>3</sub> O <sup>+</sup> 113) | Isooctane<br>(NO <sup>+</sup> 113) | Isopropyl alcohol<br>(H <sub>3</sub> O <sup>+</sup> 43) | Isopropyl alcohol<br>(NO <sup>+</sup> 59) | Methanol<br>(H <sub>3</sub> O <sup>+</sup> 33) | Methyl ethyl ketone<br>(NO <sup>+</sup> 102) | Methyl ethyl ketone<br>(O <sub>2</sub> <sup>+</sup> 72) | Nitromethane<br>(H <sub>3</sub> O <sup>+</sup> 62) | Propanal<br>(NO <sup>+</sup> 57) | Tetrahydrofuran<br>(NO <sup>+</sup> 71) | Tetrahydrofuran<br>(O <sub>2</sub> <sup>+</sup> 71) | Toluene<br>(NO <sup>+</sup> 92) | Toluene<br>(O <sub>2</sub> <sup>+</sup> 92) | Trichloroethylene<br>(O <sub>2</sub> <sup>+</sup> 130) | Trichloroethylene<br>(O <sub>2</sub> <sup>+</sup> 132) |
|---------------------------------------|---------------------------------|----------------------------------------------------|---------------------------------|----------------------------------|---------------------------------------------|-----------------------------------|------------------------------------------------|------------------------------------------------|--------------------------------------------------|------------------------------------|---------------------------------------------------------|-------------------------------------------|------------------------------------------------|----------------------------------------------|---------------------------------------------------------|----------------------------------------------------|----------------------------------|-----------------------------------------|-----------------------------------------------------|---------------------------------|---------------------------------------------|--------------------------------------------------------|--------------------------------------------------------|
| 125–1                                 | 98.8                            | 99.5                                               | 100.0                           | 99.3                             | 102.0                                       | 95.4                              | 109.0                                          | 97.1                                           | 226.9                                            | 107.4                              | 101.8                                                   | 67.5                                      | 98.4                                           | 100.1                                        | 106.4                                                   | 101.0                                              | 107.1                            | 95.7                                    | 105.9                                               | 98.0                            | 105.6                                       | 108.9                                                  | 111.7                                                  |
| 125–2                                 | 98.0                            | 98.3                                               | 98.7                            | 114.4                            | 103.2                                       | 97.7                              | 110.7                                          | 100.6                                          | 209.6                                            | 100.1                              | 95.6                                                    | 64.5                                      | 100.0                                          | 102.0                                        | 105.3                                                   | 101.0                                              | 106.6                            | 96.6                                    | 104.8                                               | 101.7                           | 103.8                                       | 117.7                                                  | 109.6                                                  |
| 125–3                                 | 97.1                            | 99.1                                               | 101.2                           | 92.4                             | 101.2                                       | 103.5                             | 95.3                                           | 104.0                                          | 284.6                                            | 129.1                              | 97.0                                                    | 64.5                                      | 97.2                                           | 102.0                                        | 103.1                                                   | 102.0                                              | 107.9                            | 96.1                                    | 103.4                                               | 101.7                           | 104.7                                       | 102.0                                                  | 104.5                                                  |
| <b>Mean</b>                           | <b>98.0</b>                     | <b>99.0</b>                                        | <b>100.0</b>                    | <b>102.1</b>                     | <b>102.1</b>                                | <b>98.9</b>                       | <b>105.0</b>                                   | <b>100.6</b>                                   | <b>240.4</b>                                     | <b>112.2</b>                       | <b>98.1</b>                                             | <b>65.5</b>                               | <b>98.5</b>                                    | <b>101.4</b>                                 | <b>105.0</b>                                            | <b>101.4</b>                                       | <b>107.2</b>                     | <b>96.1</b>                             | <b>104.7</b>                                        | <b>100.5</b>                    | <b>104.7</b>                                | <b>109.5</b>                                           | <b>108.6</b>                                           |
| <b>SD</b>                             | <b>0.70</b>                     | <b>0.52</b>                                        | <b>1.03</b>                     | <b>9.18</b>                      | <b>0.85</b>                                 | <b>3.43</b>                       | <b>6.91</b>                                    | <b>2.82</b>                                    | <b>32.06</b>                                     | <b>12.33</b>                       | <b>2.64</b>                                             | <b>1.44</b>                               | <b>1.14</b>                                    | <b>0.91</b>                                  | <b>1.37</b>                                             | <b>0.46</b>                                        | <b>0.57</b>                      | <b>0.39</b>                             | <b>1.04</b>                                         | <b>1.73</b>                     | <b>0.75</b>                                 | <b>6.39</b>                                            | <b>3.01</b>                                            |
| <b>%RSD</b>                           | <b>0.71</b>                     | <b>0.53</b>                                        | <b>1.0</b>                      | <b>9.0</b>                       | <b>0.83</b>                                 | <b>3.5</b>                        | <b>6.6</b>                                     | <b>2.8</b>                                     | <b>13.3</b>                                      | <b>11.0</b>                        | <b>2.7</b>                                              | <b>2.2</b>                                | <b>1.2</b>                                     | <b>0.90</b>                                  | <b>1.3</b>                                              | <b>0.45</b>                                        | <b>0.53</b>                      | <b>0.41</b>                             | <b>1.0</b>                                          | <b>1.7</b>                      | <b>0.72</b>                                 | <b>5.8</b>                                             | <b>2.8</b>                                             |
| 250–1                                 | 103.1                           | 104.7                                              | 107.1                           | 108.7                            | 105.1                                       | 102.4                             | 109.2                                          | 115.8                                          | 240.4                                            | 104.5                              | 104.2                                                   | 68.5                                      | 102.0                                          | 104.3                                        | 104.0                                                   | 104.2                                              | 110.8                            | 100.9                                   | 104.7                                               | 107.1                           | 104.6                                       | 100.8                                                  | 110.0                                                  |
| 250–2                                 | 105.3                           | 103.6                                              | 104.8                           | 102.2                            | 108.5                                       | 99.7                              | 111.5                                          | 119.3                                          | 312.5                                            | 144.4                              | 101.4                                                   | 69.4                                      | 100.8                                          | 107.6                                        | 113.2                                                   | 104.7                                              | 110.2                            | 99.8                                    | 112.0                                               | 108.5                           | 110.1                                       | 116.9                                                  | 116.7                                                  |
| 250–3                                 | 103.2                           | 108.7                                              | 108.8                           | 115.6                            | 110.7                                       | 107.5                             | 110.7                                          | 109.8                                          | 234.6                                            | 128.1                              | 106.9                                                   | 75.2                                      | 111.9                                          | 107.2                                        | 114.2                                                   | 105.7                                              | 115.5                            | 104.0                                   | 109.6                                               | 109.9                           | 110.1                                       | 112.5                                                  | 112.6                                                  |
| <b>Mean</b>                           | <b>103.9</b>                    | <b>105.7</b>                                       | <b>106.9</b>                    | <b>108.8</b>                     | <b>108.1</b>                                | <b>103.2</b>                      | <b>110.5</b>                                   | <b>114.9</b>                                   | <b>262.5</b>                                     | <b>125.6</b>                       | <b>104.2</b>                                            | <b>71.0</b>                               | <b>104.9</b>                                   | <b>106.4</b>                                 | <b>110.5</b>                                            | <b>104.9</b>                                       | <b>112.2</b>                     | <b>101.6</b>                            | <b>108.8</b>                                        | <b>108.5</b>                    | <b>108.2</b>                                | <b>110.1</b>                                           | <b>113.1</b>                                           |
| <b>SD</b>                             | <b>1.00</b>                     | <b>2.18</b>                                        | <b>1.63</b>                     | <b>5.47</b>                      | <b>2.30</b>                                 | <b>3.21</b>                       | <b>0.95</b>                                    | <b>3.92</b>                                    | <b>35.43</b>                                     | <b>16.38</b>                       | <b>2.23</b>                                             | <b>2.97</b>                               | <b>4.98</b>                                    | <b>1.44</b>                                  | <b>4.59</b>                                             | <b>0.61</b>                                        | <b>2.35</b>                      | <b>1.77</b>                             | <b>3.03</b>                                         | <b>1.12</b>                     | <b>2.56</b>                                 | <b>6.80</b>                                            | <b>2.74</b>                                            |
| <b>%RSD</b>                           | <b>1.0</b>                      | <b>2.1</b>                                         | <b>1.5</b>                      | <b>5.0</b>                       | <b>2.1</b>                                  | <b>3.1</b>                        | <b>0.86</b>                                    | <b>3.4</b>                                     | <b>13.5</b>                                      | <b>13.0</b>                        | <b>2.1</b>                                              | <b>4.2</b>                                | <b>4.7</b>                                     | <b>1.4</b>                                   | <b>4.2</b>                                              | <b>0.58</b>                                        | <b>2.1</b>                       | <b>1.7</b>                              | <b>2.8</b>                                          | <b>1.0</b>                      | <b>2.4</b>                                  | <b>6.2</b>                                             | <b>2.4</b>                                             |
| 500–1                                 | 100.0                           | 100.5                                              | 102.7                           | 103.1                            | 107.7                                       | 100.6                             | 105.0                                          | 119.5                                          | 237.0                                            | 128.4                              | 99.1                                                    | 72.2                                      | 97.9                                           | 100.2                                        | 103.7                                                   | 100.9                                              | 106.9                            | 99.0                                    | 106.4                                               | 100.0                           | 102.5                                       | 107.5                                                  | 108.2                                                  |
| 500–2                                 | 101.2                           | 104.7                                              | 102.3                           | 105.9                            | 107.7                                       | 99.9                              | 103.8                                          | 101.0                                          | 228.4                                            | 116.6                              | 99.4                                                    | 72.8                                      | 100.9                                          | 102.1                                        | 105.8                                                   | 97.2                                               | 108.3                            | 98.4                                    | 105.5                                               | 103.7                           | 87.0                                        | 91.2                                                   | 86.2                                                   |
| 500–3                                 | 96.9                            | 102.6                                              | 100.5                           | 105.7                            | 104.6                                       | 99.2                              | 105.4                                          | 106.2                                          | 206.7                                            | 122.1                              | 100.1                                                   | 69.5                                      | 95.9                                           | 101.2                                        | 106.5                                                   | 99.2                                               | 108.3                            | 100.8                                   | 104.6                                               | 102.1                           | 102.7                                       | 106.5                                                  | 106.4                                                  |
| <b>Mean</b>                           | <b>99.4</b>                     | <b>102.6</b>                                       | <b>101.9</b>                    | <b>104.9</b>                     | <b>106.7</b>                                | <b>99.9</b>                       | <b>104.7</b>                                   | <b>108.9</b>                                   | <b>224.0</b>                                     | <b>122.4</b>                       | <b>99.5</b>                                             | <b>71.5</b>                               | <b>98.2</b>                                    | <b>101.2</b>                                 | <b>105.3</b>                                            | <b>99.1</b>                                        | <b>107.8</b>                     | <b>99.4</b>                             | <b>105.5</b>                                        | <b>101.9</b>                    | <b>97.4</b>                                 | <b>101.7</b>                                           | <b>100.2</b>                                           |
| <b>SD</b>                             | <b>1.79</b>                     | <b>1.72</b>                                        | <b>0.95</b>                     | <b>1.26</b>                      | <b>1.47</b>                                 | <b>0.60</b>                       | <b>0.65</b>                                    | <b>7.81</b>                                    | <b>12.74</b>                                     | <b>4.82</b>                        | <b>0.43</b>                                             | <b>1.46</b>                               | <b>2.04</b>                                    | <b>0.79</b>                                  | <b>1.17</b>                                             | <b>1.50</b>                                        | <b>0.65</b>                      | <b>1.02</b>                             | <b>0.74</b>                                         | <b>1.50</b>                     | <b>7.35</b>                                 | <b>7.49</b>                                            | <b>9.97</b>                                            |
| <b>%RSD</b>                           | <b>1.8</b>                      | <b>1.7</b>                                         | <b>0.94</b>                     | <b>1.2</b>                       | <b>1.4</b>                                  | <b>0.60</b>                       | <b>0.62</b>                                    | <b>7.2</b>                                     | <b>5.7</b>                                       | <b>3.9</b>                         | <b>0.43</b>                                             | <b>2.0</b>                                | <b>2.1</b>                                     | <b>0.78</b>                                  | <b>1.1</b>                                              | <b>1.5</b>                                         | <b>0.60</b>                      | <b>1.0</b>                              | <b>0.70</b>                                         | <b>1.5</b>                      | <b>7.5</b>                                  | <b>7.4</b>                                             | <b>9.9</b>                                             |

## Figures

### A. Measured Headspace Concentrations Relative to Aqueous Solutions

**Figure S1.** Ratio of measured headspace concentration of analytes (Mix 1) in the solvent-water mixes (0 to 10% solvent) to that obtained in aqueous solution. All measurements have the blank subtracted. The legend indicates first the matrix, then the reagent ion (first letter), and finally the product ion  $m/z$ . All product ions are shown.

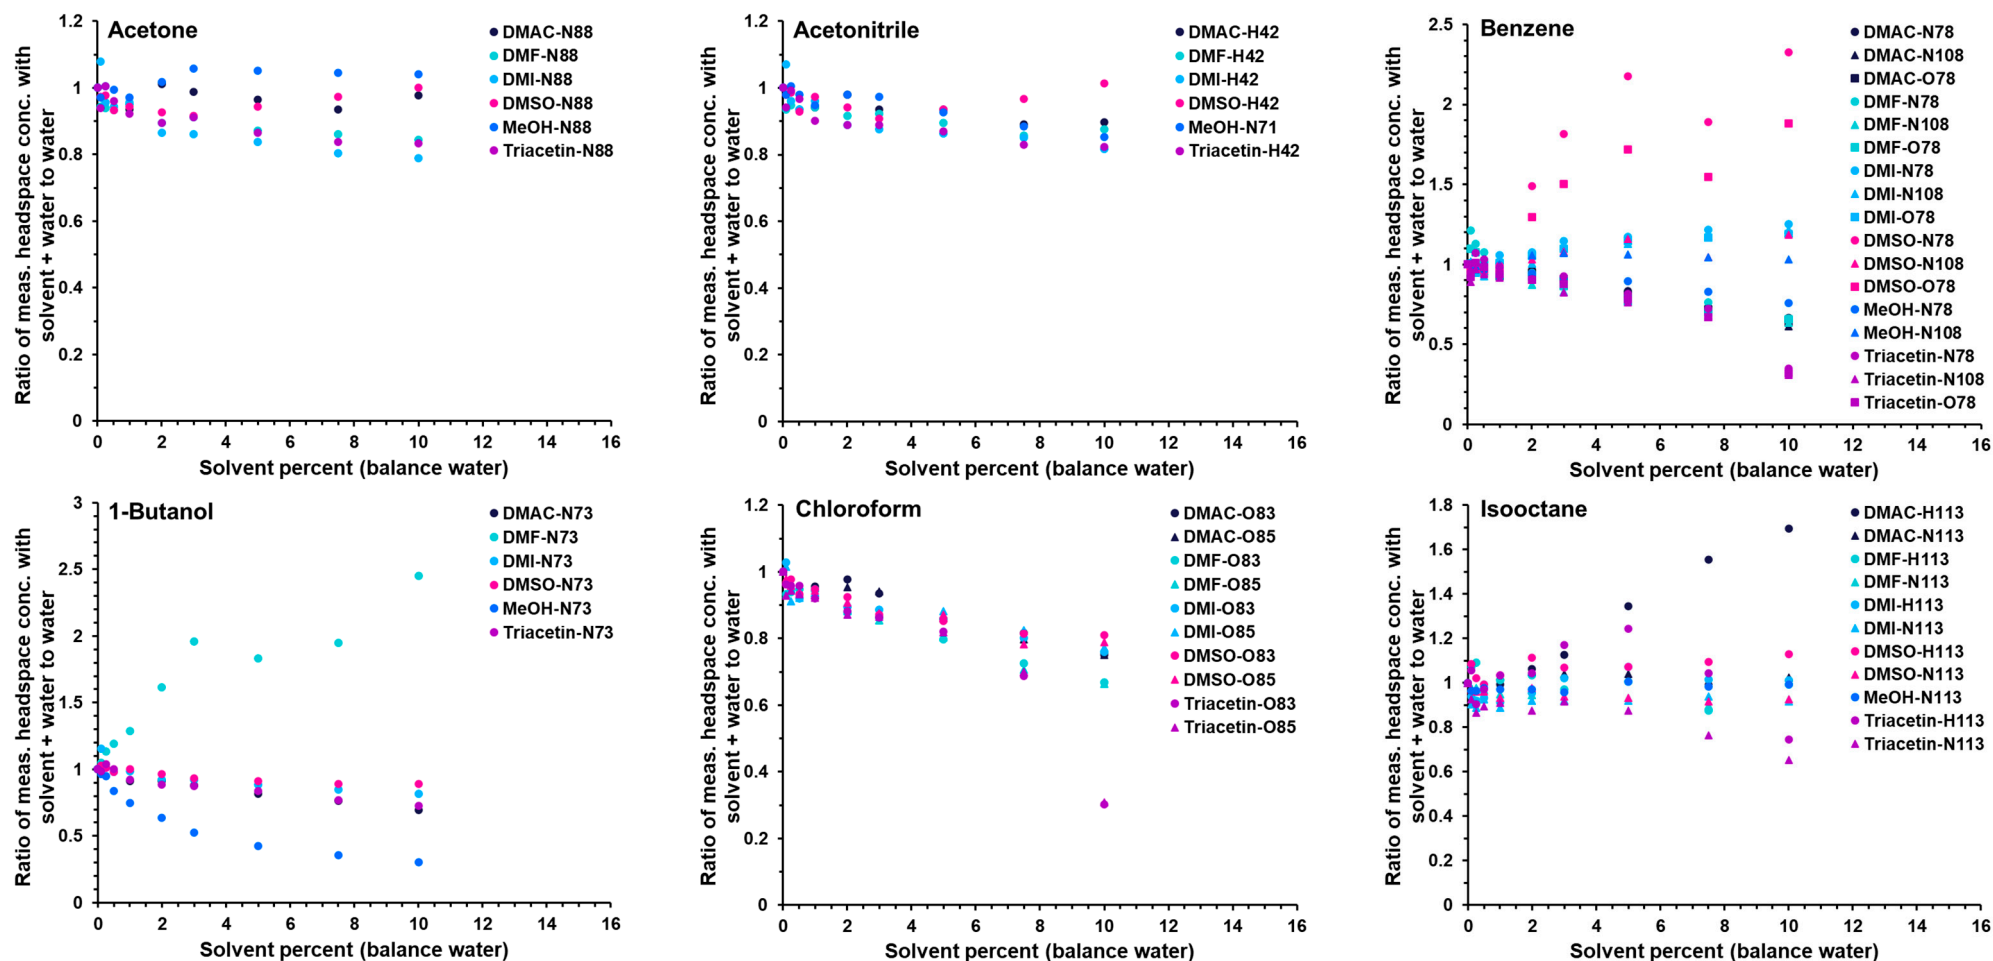

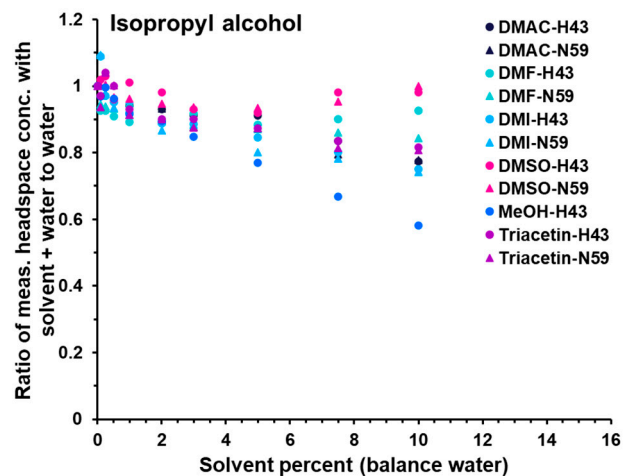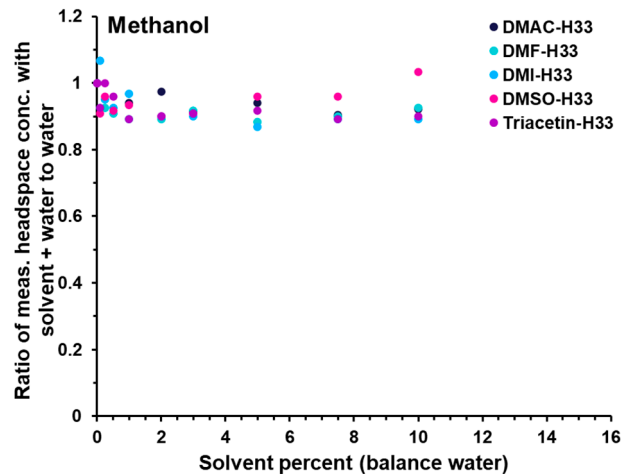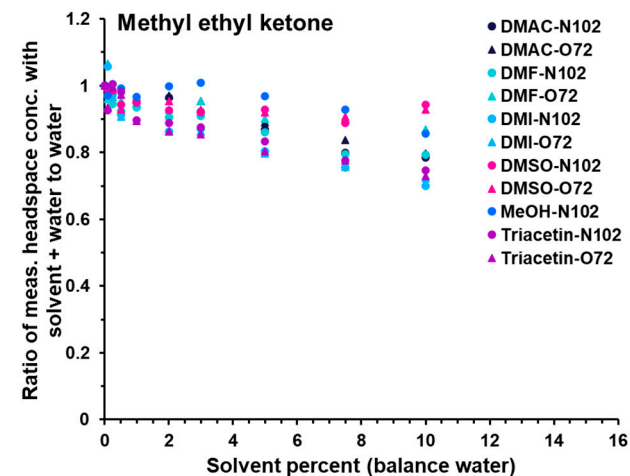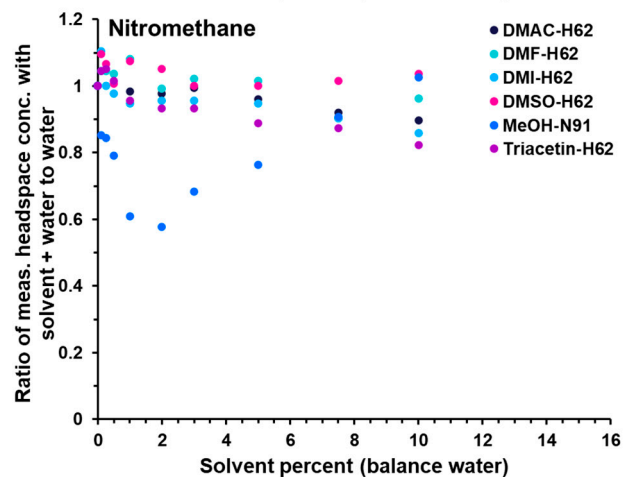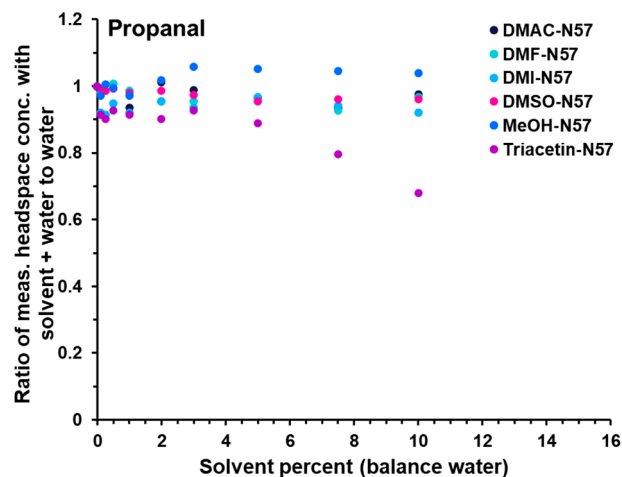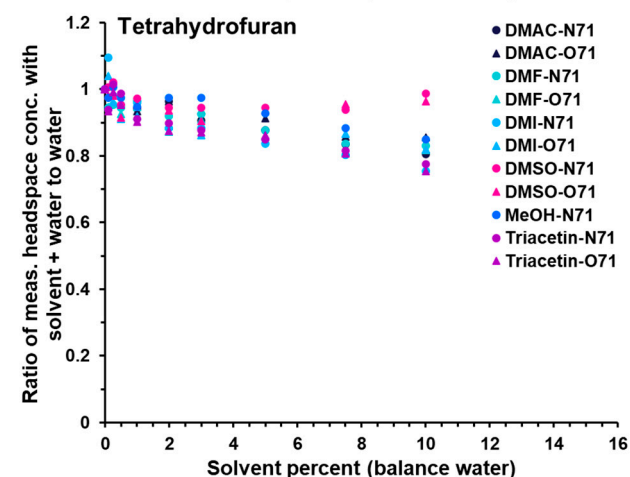



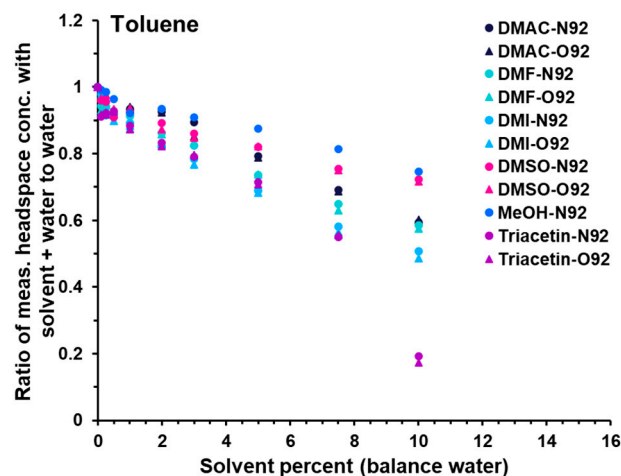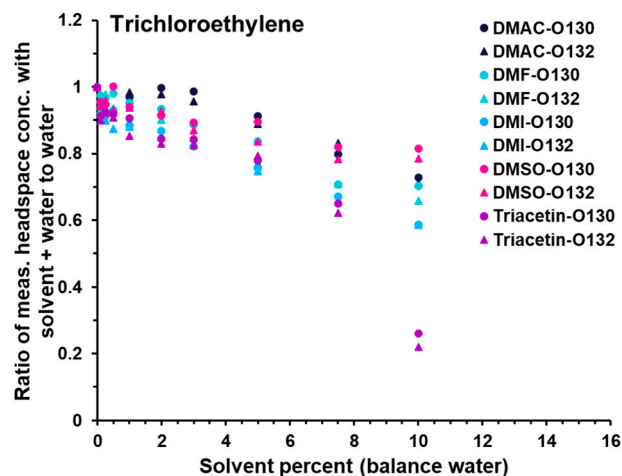

**Figure S2.** Ratio of measured headspace concentration of all analytes (Mix 1) in DMAC-water, DMI-water, or DMAC-water mixtures (0 to 100% solvent) to that obtained in pure aqueous solution. All measurements have the blank subtracted. The legend indicates first the matrix, then the reagent ion (first letter), and finally the product ion  $m/z$ . All product ions are shown.

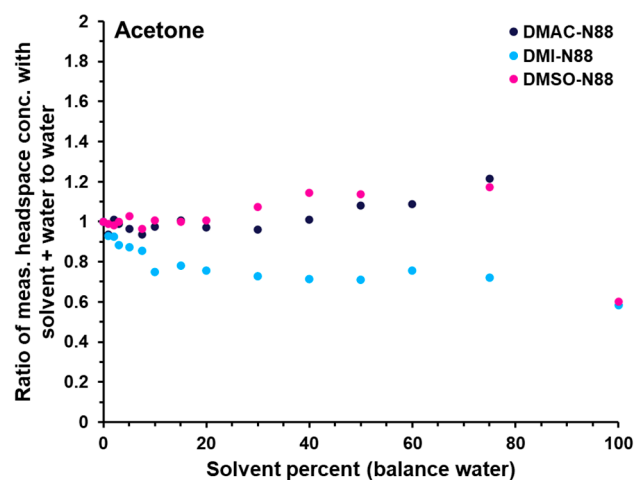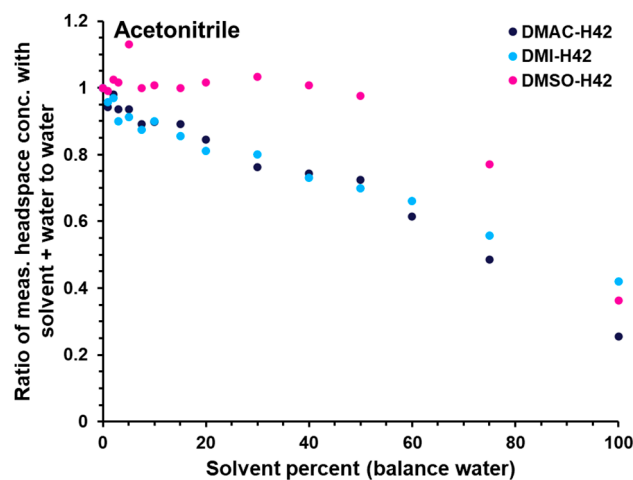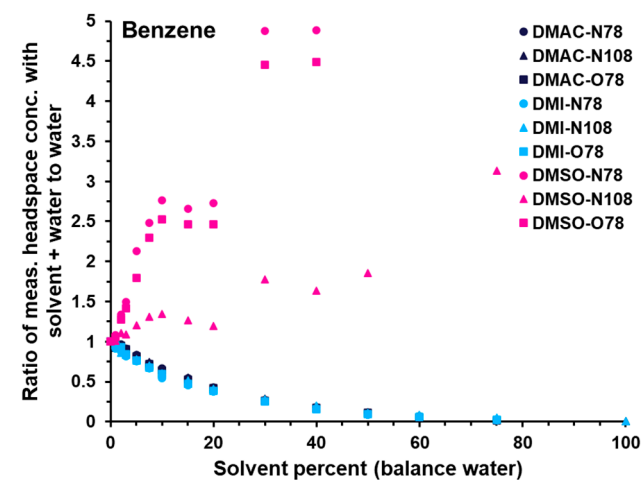

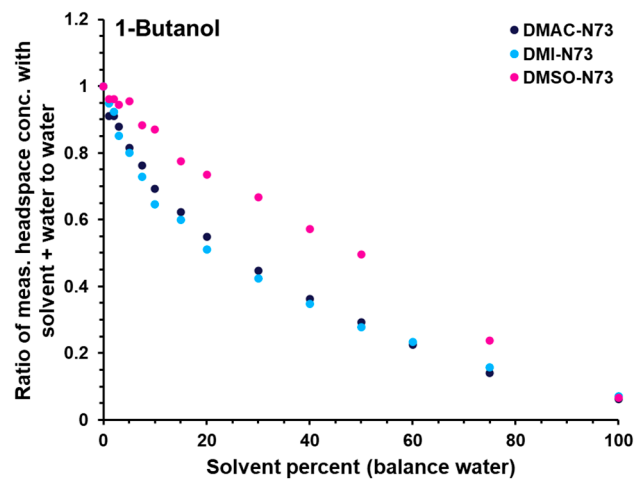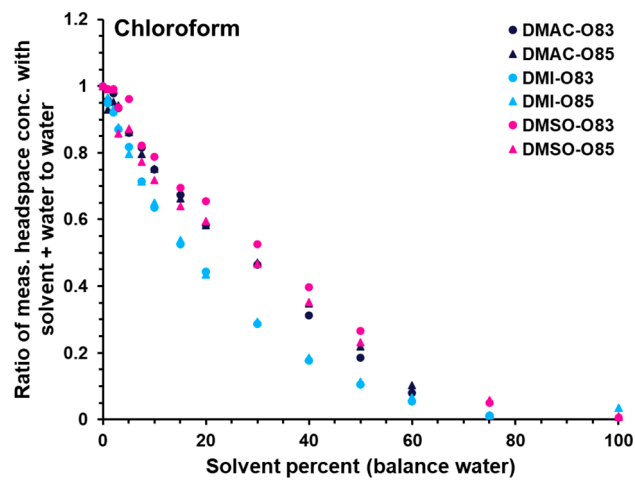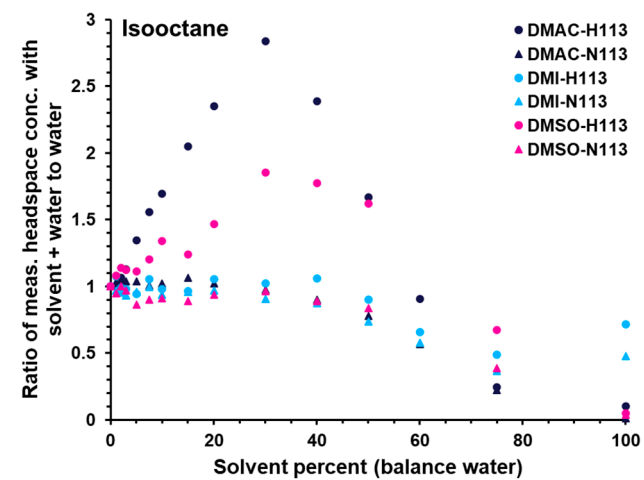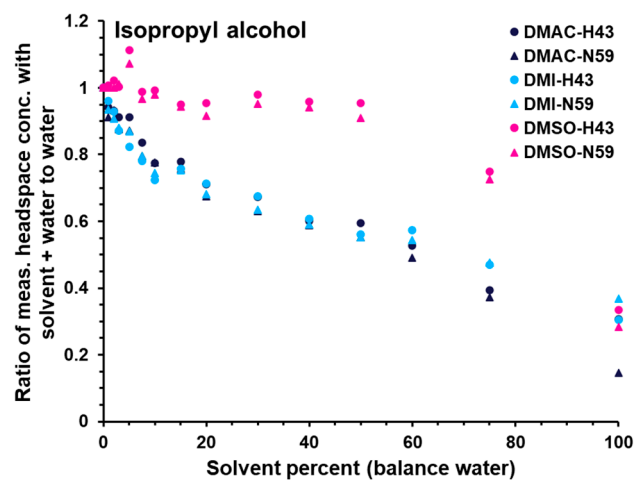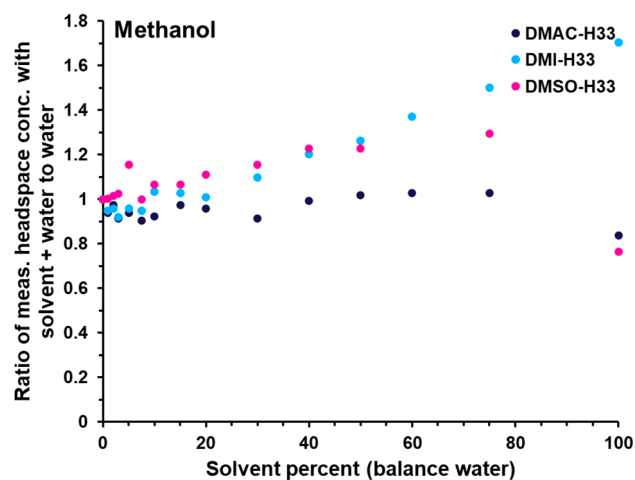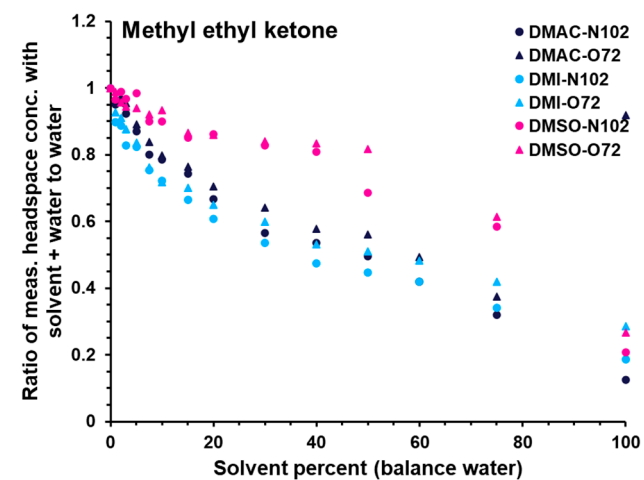

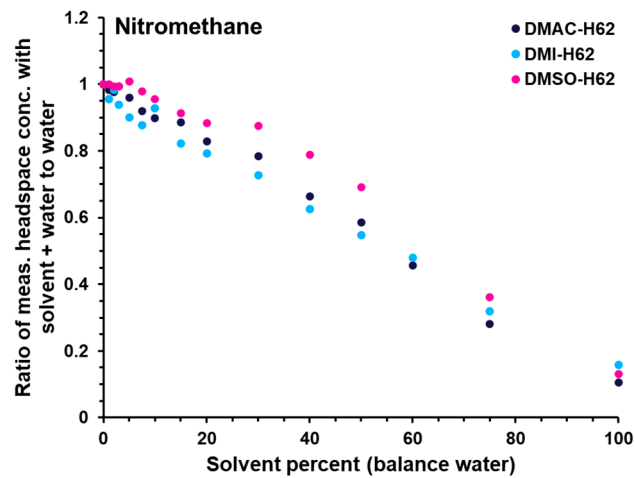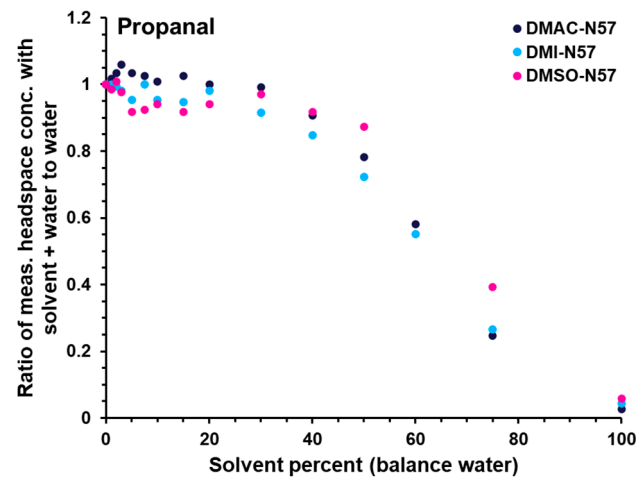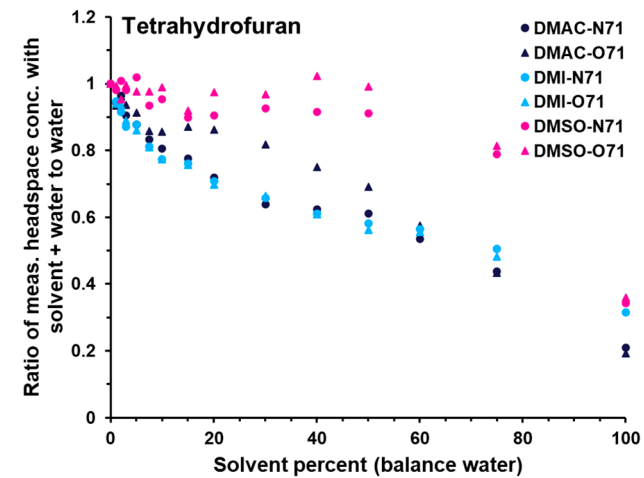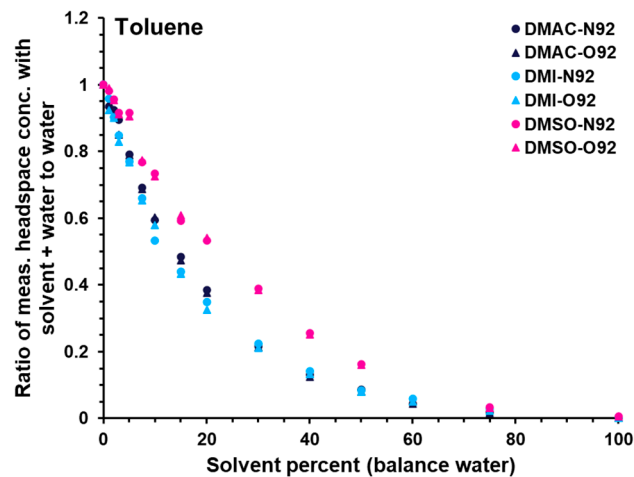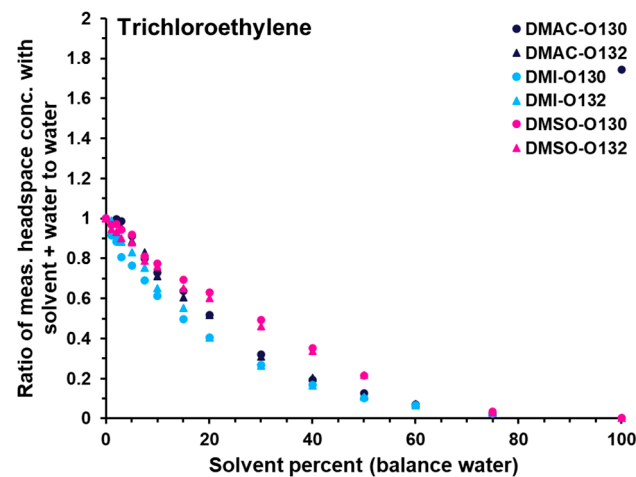

## B. Linearity

**Figure S3.** SIFT-MS linearity data for Mix 1 in 5% solvent:95% water for all six solvents evaluated.

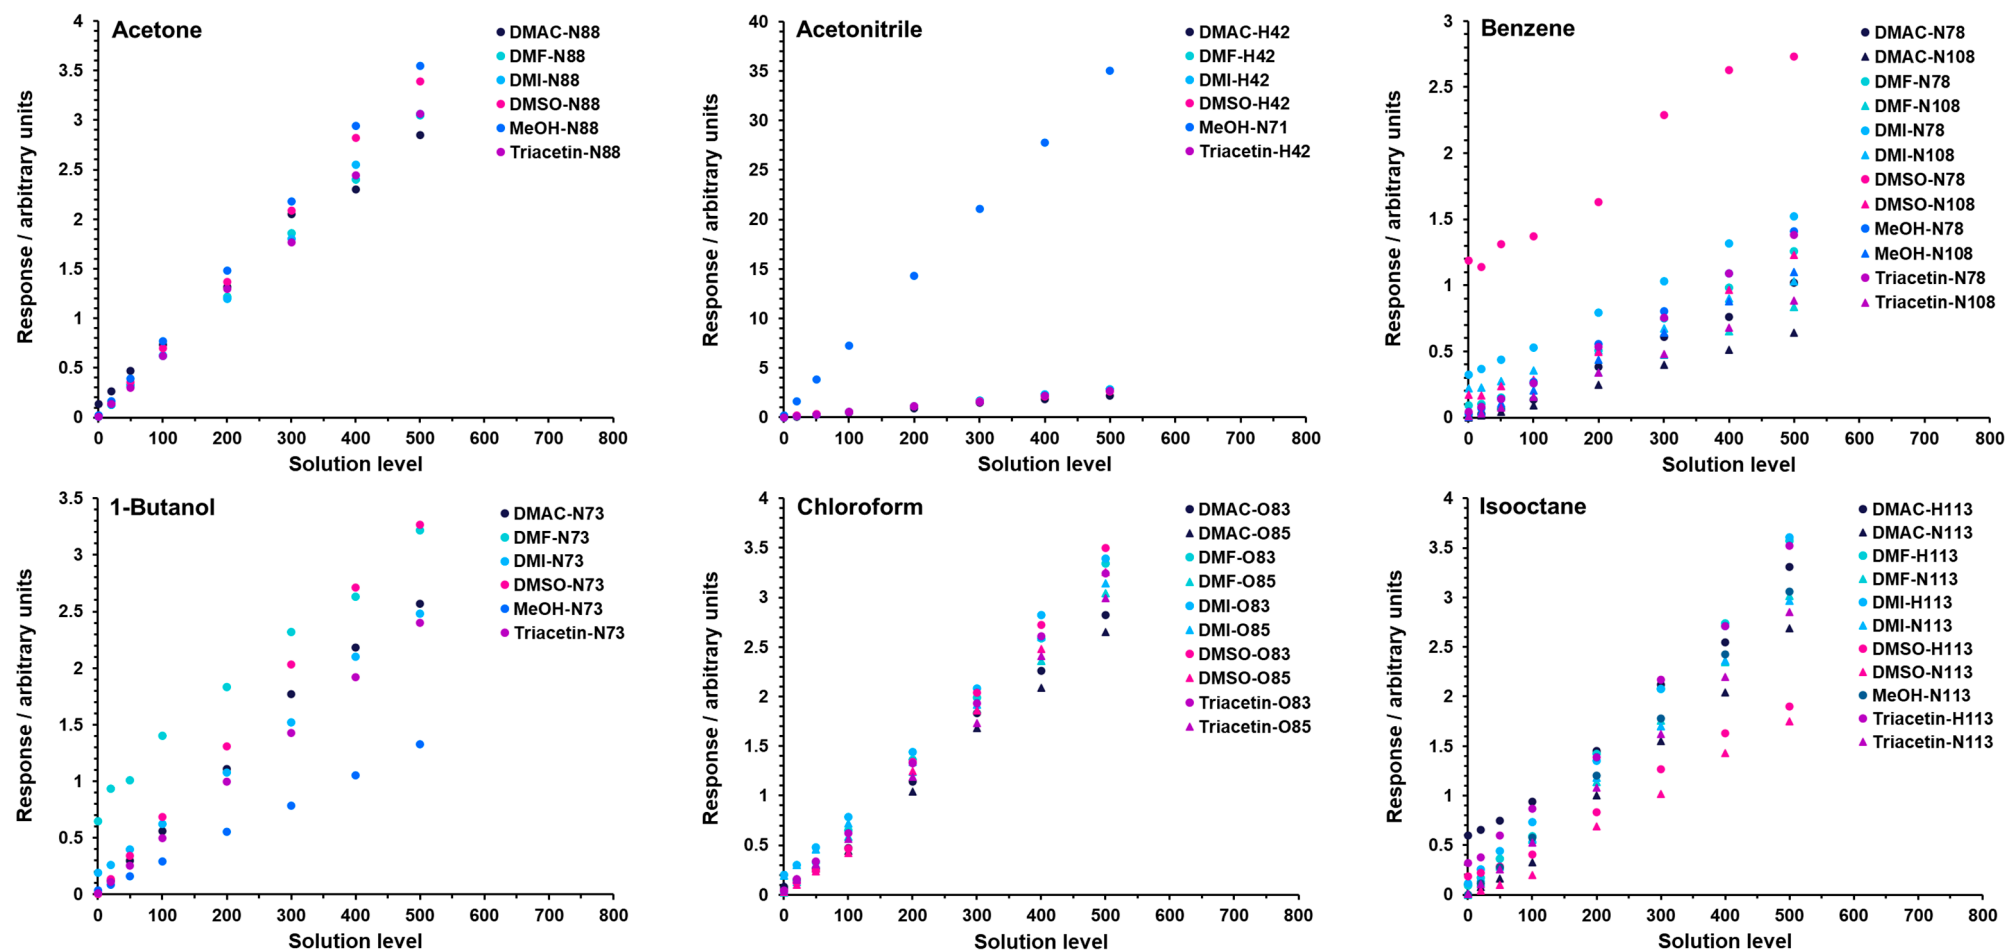

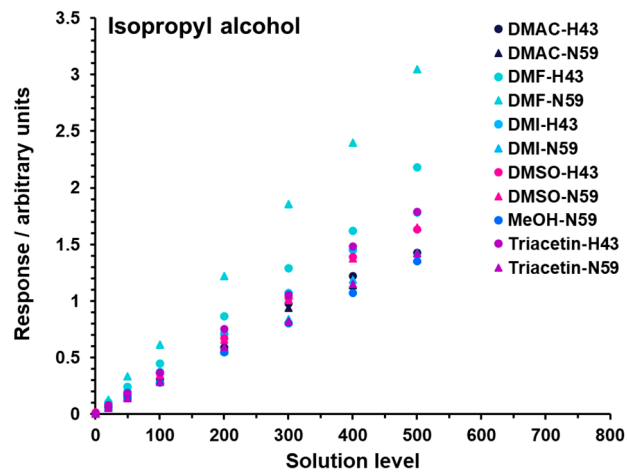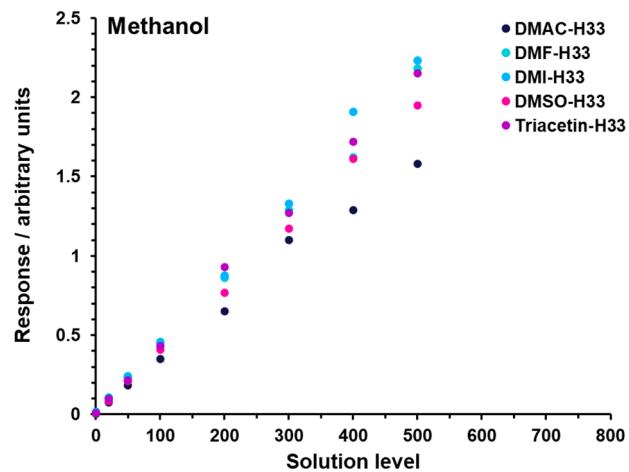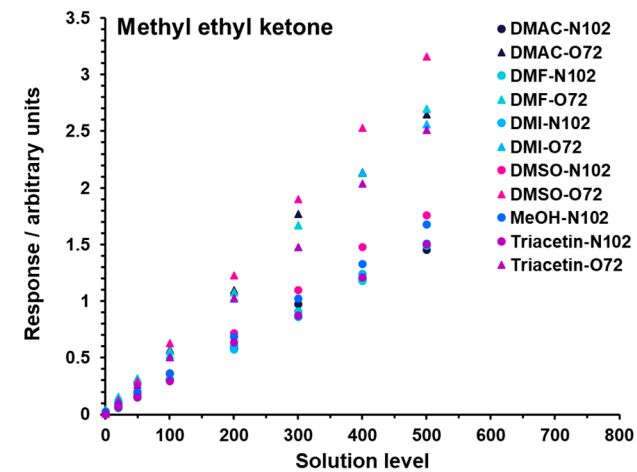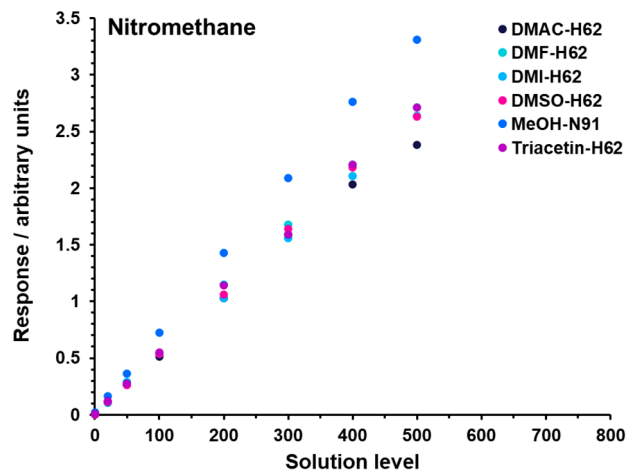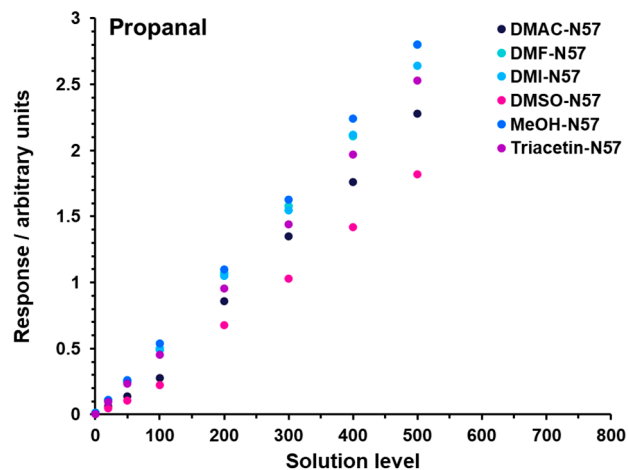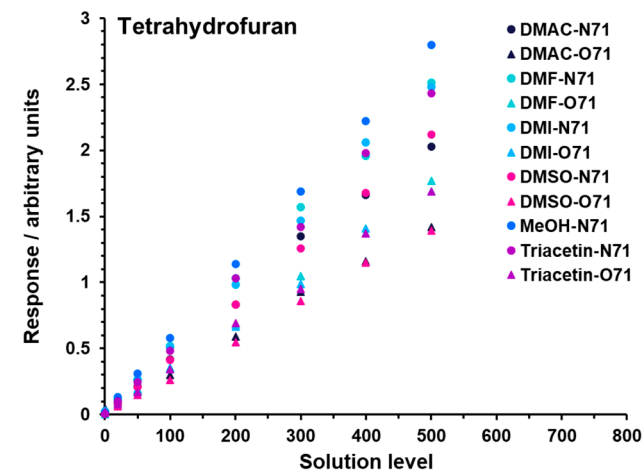

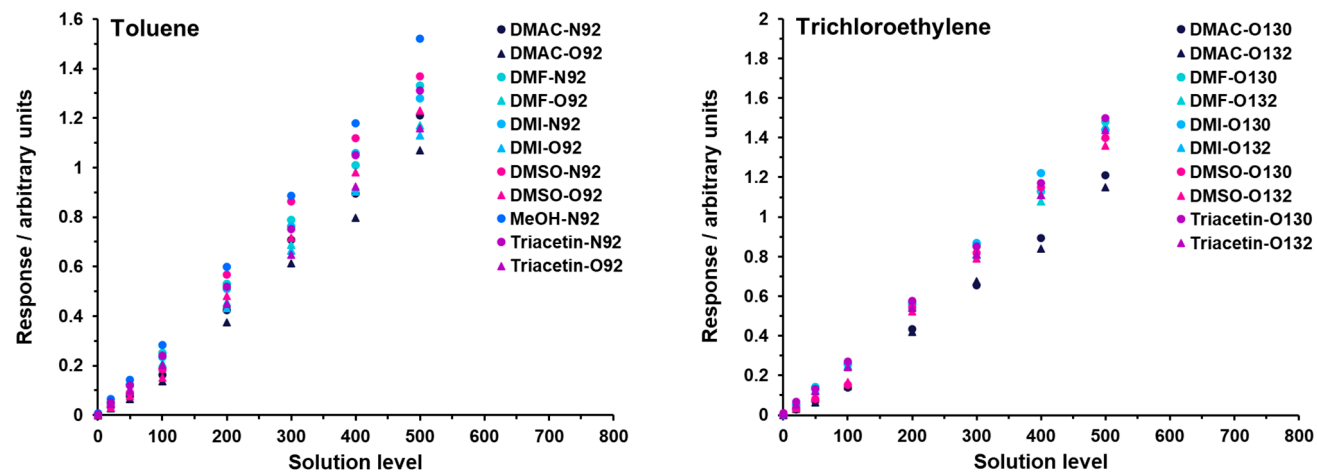

**Figure S4.** SIFT-MS linearity data for Mix 1 in 5, 10, 25%, and 50% DMAC (balance water) across the high concentration range.

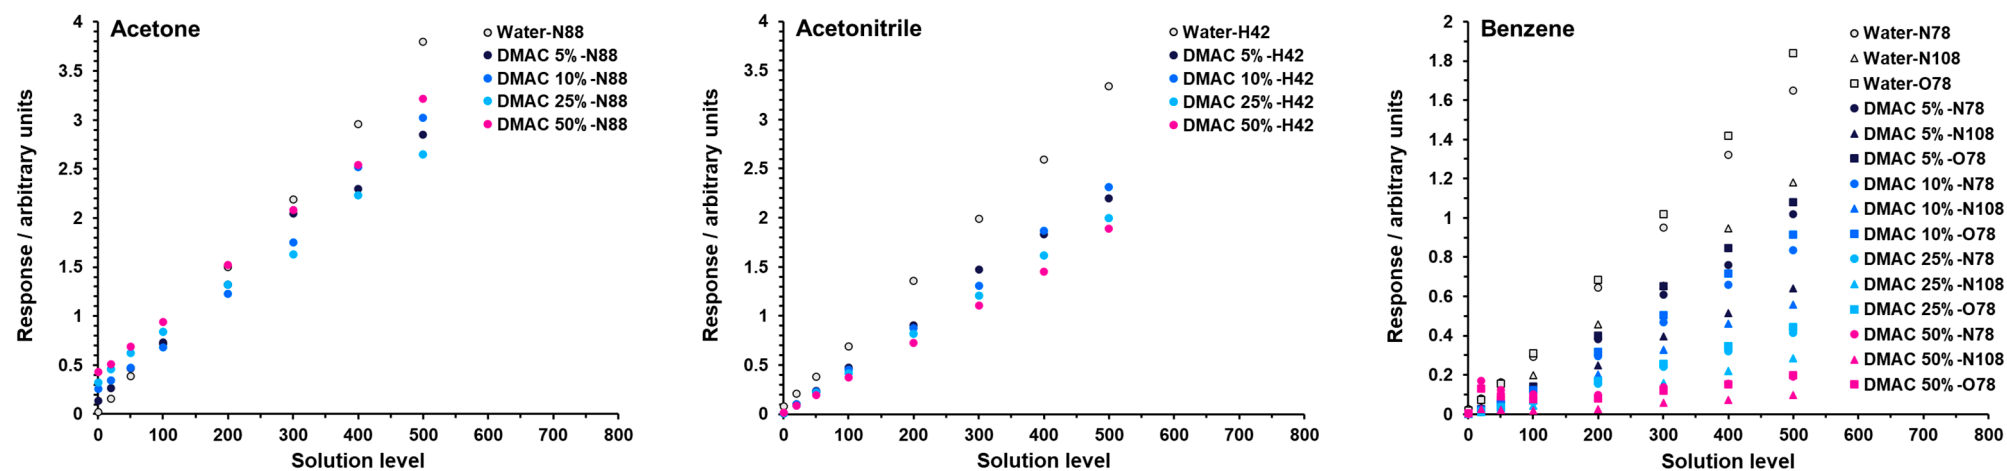

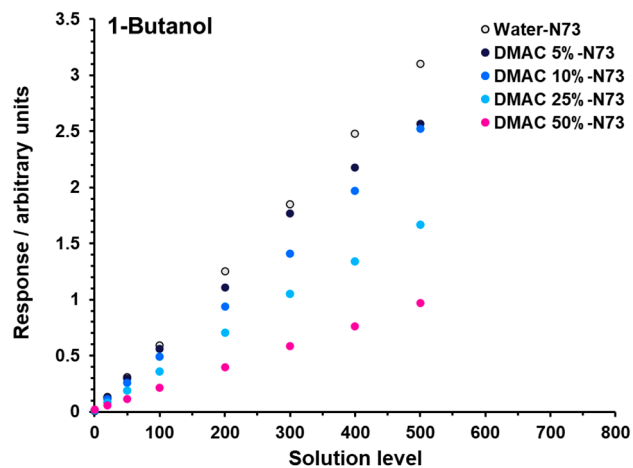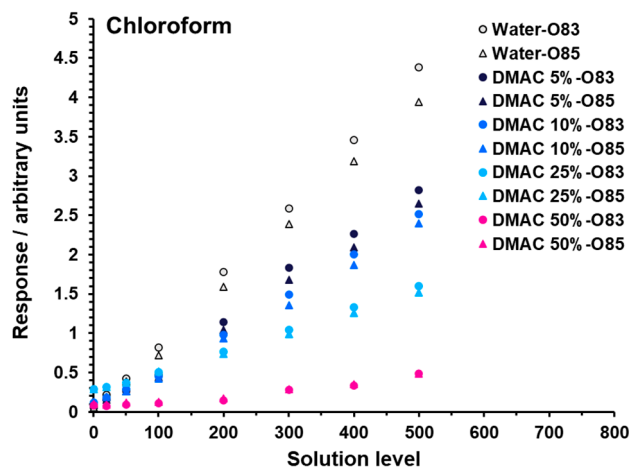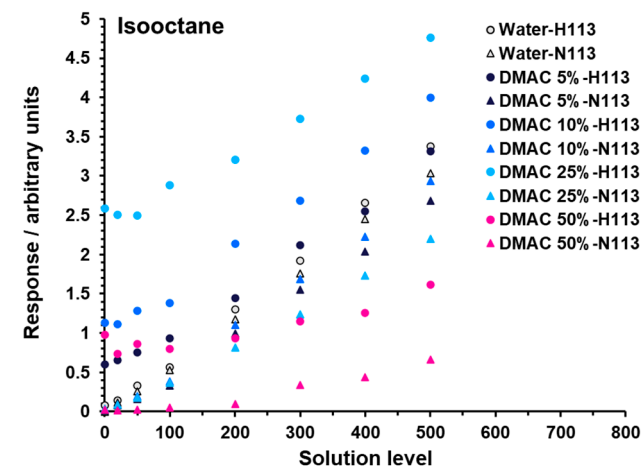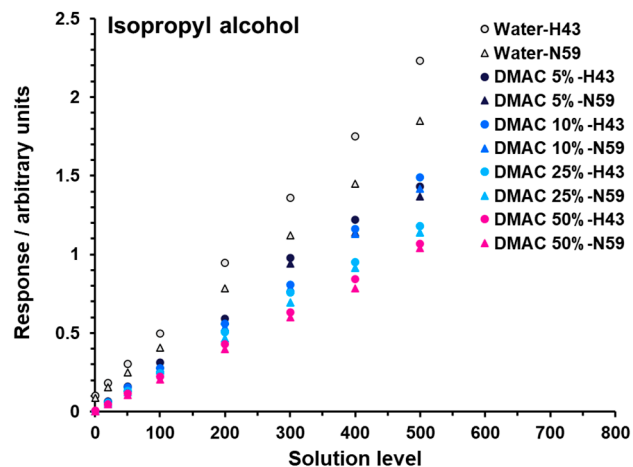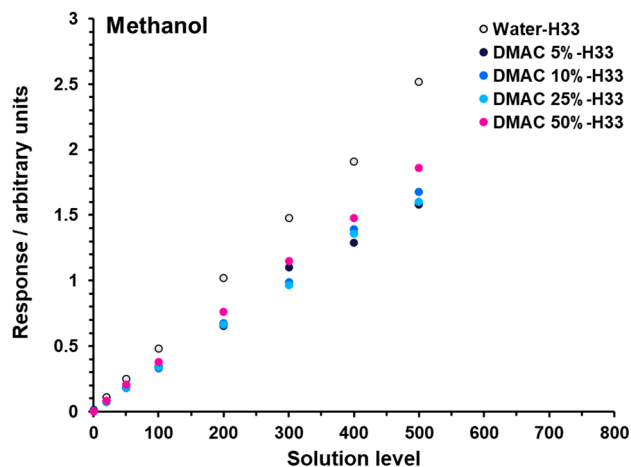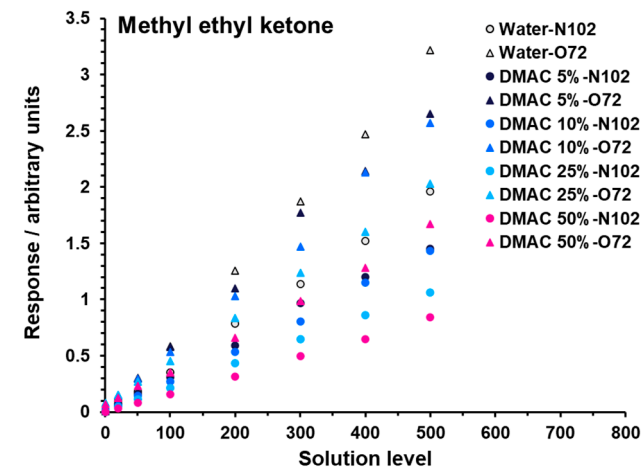

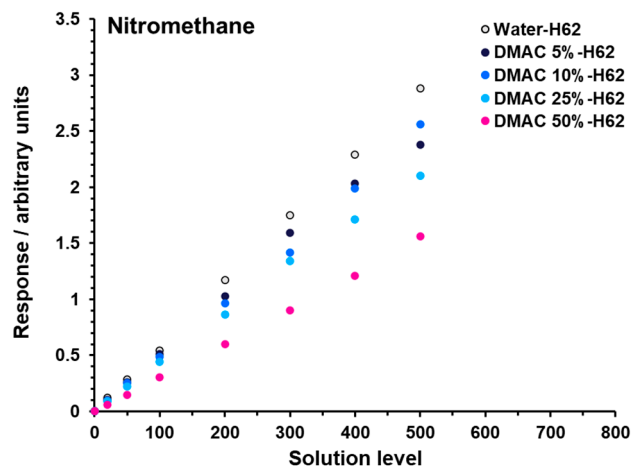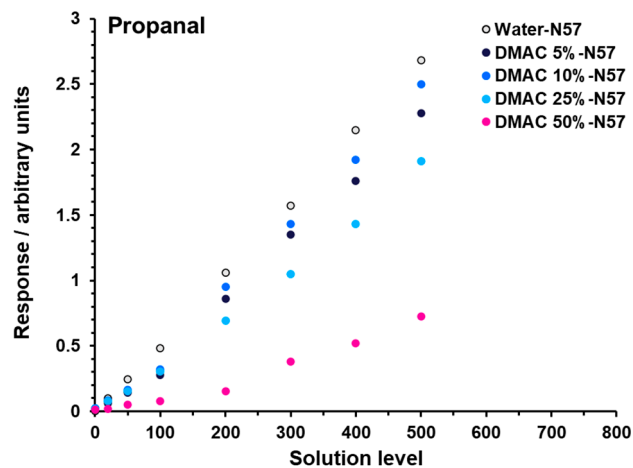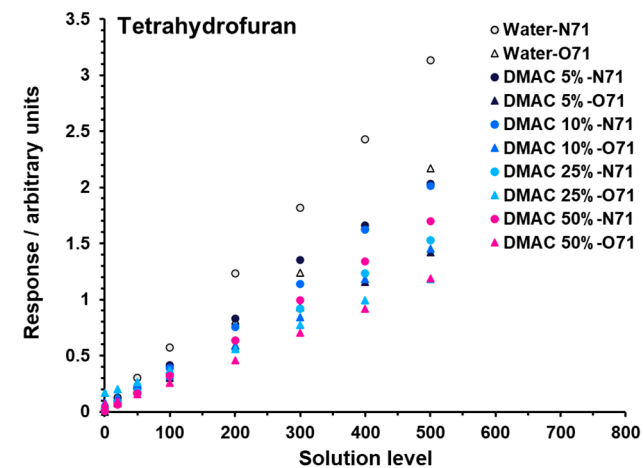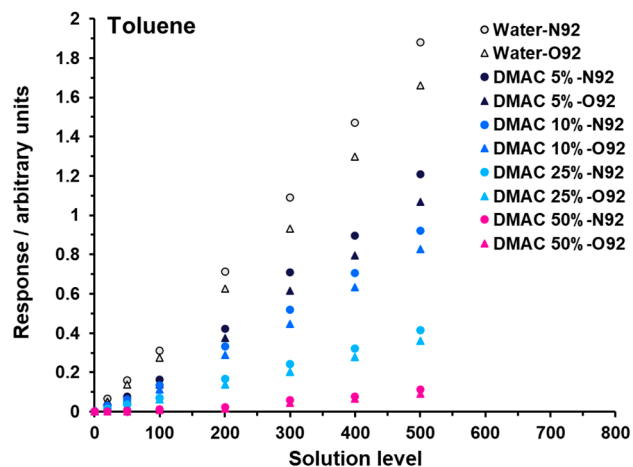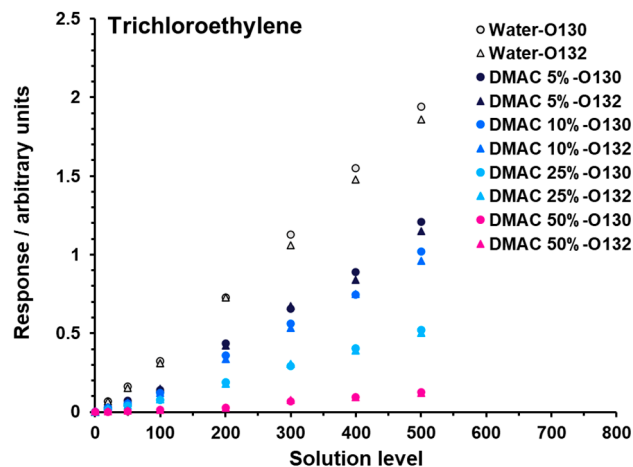



**Figure S5.** SIFT-MS linearity data for Mix 1 in 5, 10, 25, 50, 75 and 100% DMI (balance water) across the high concentration range.

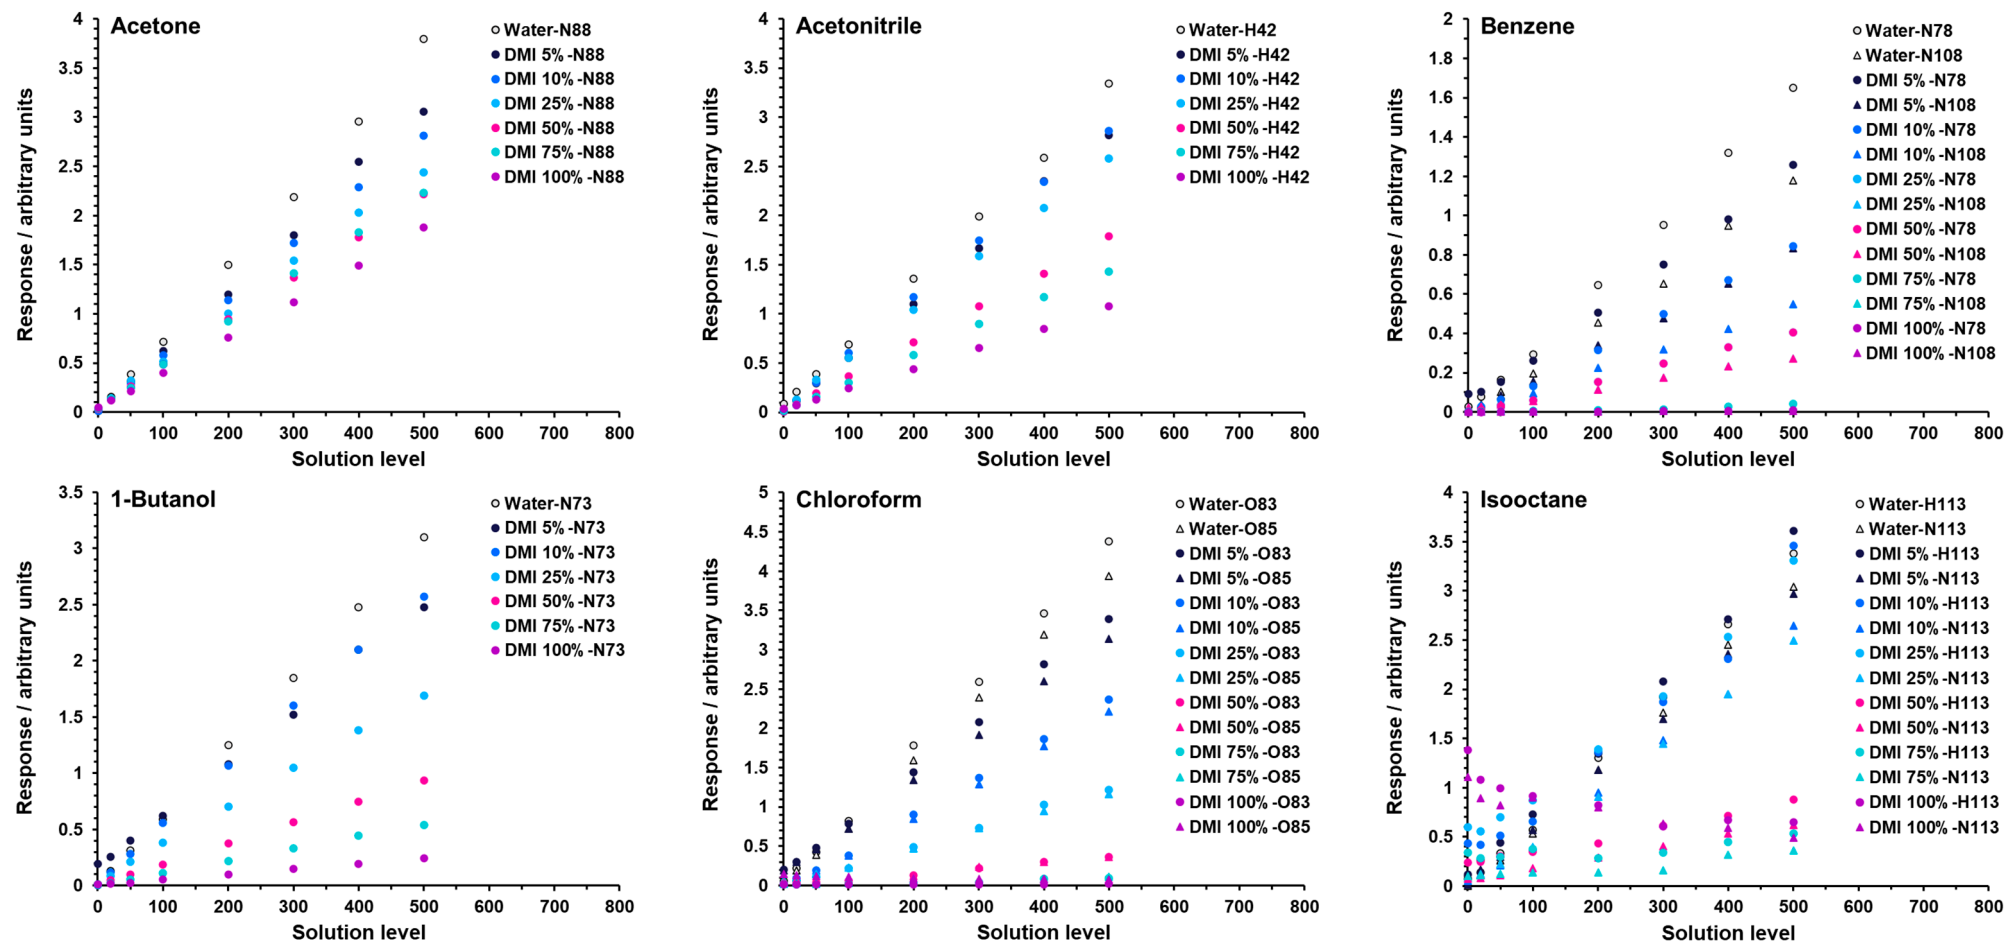

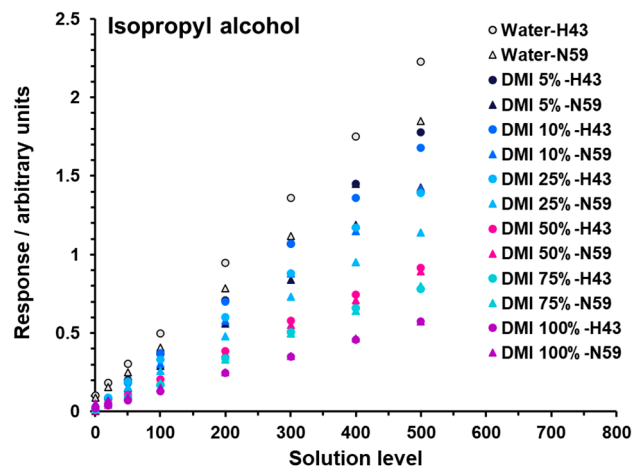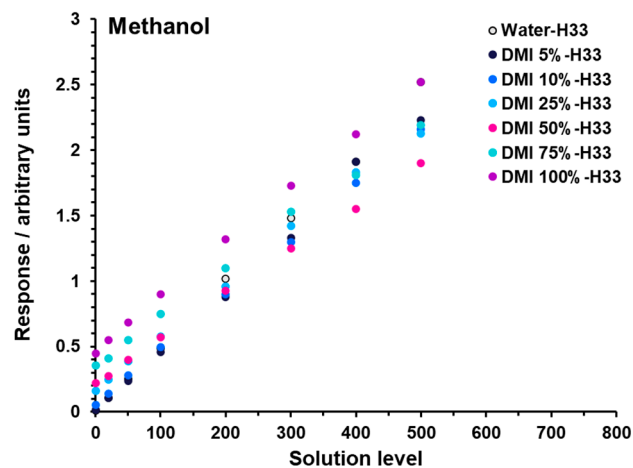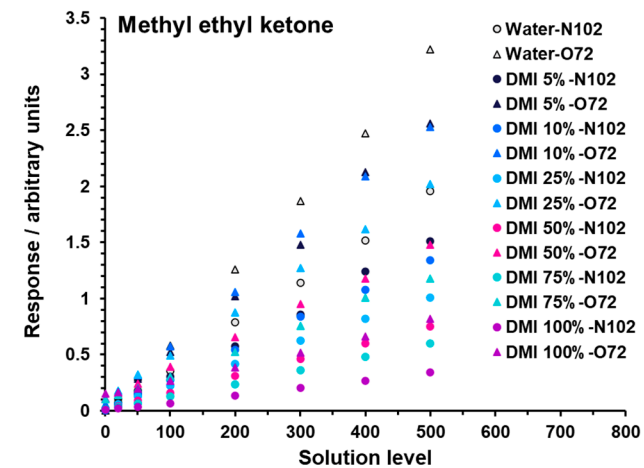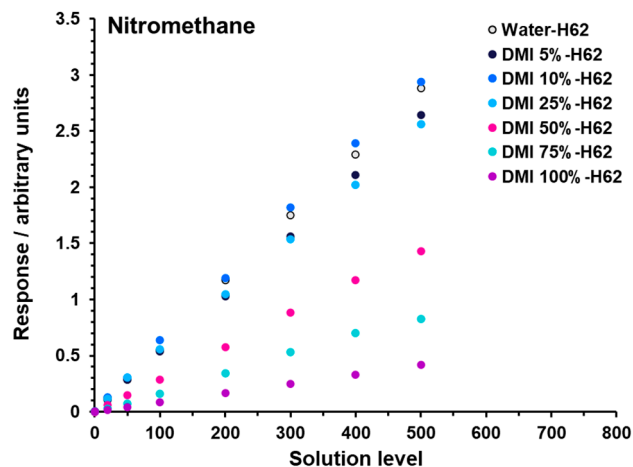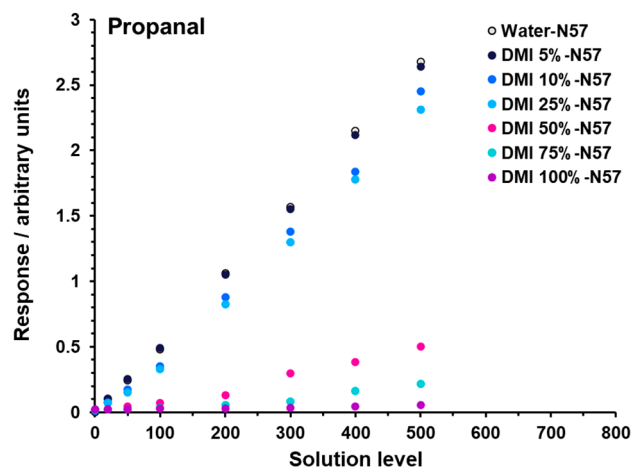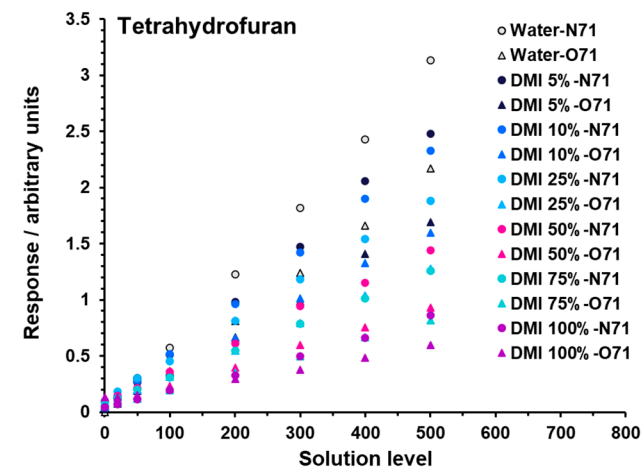

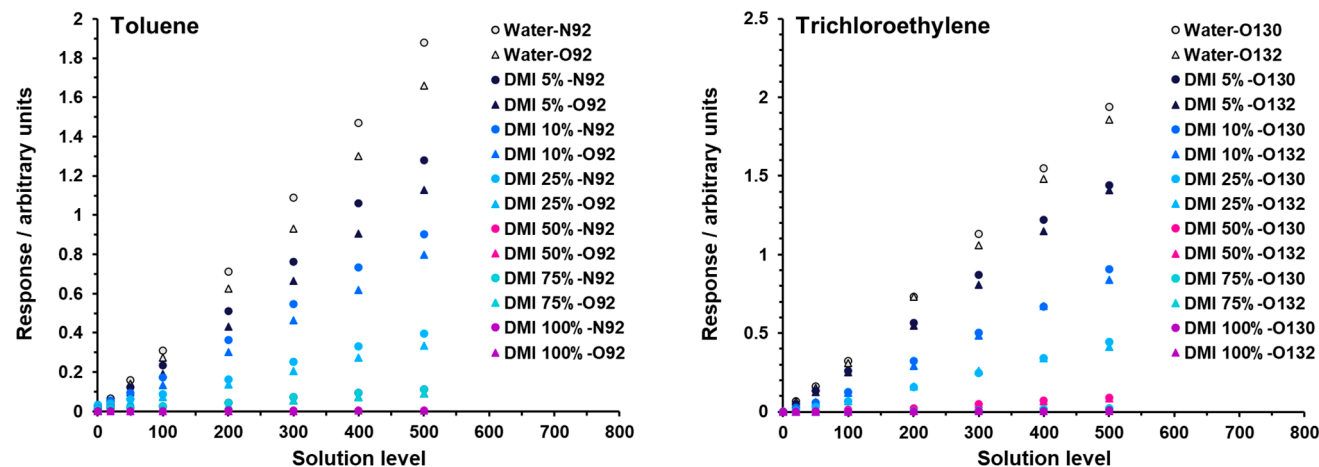

**Figure S6.** SIFT-MS linearity data for Mix 1 in 5 and 10% DMI (balance water) across the low concentration range.

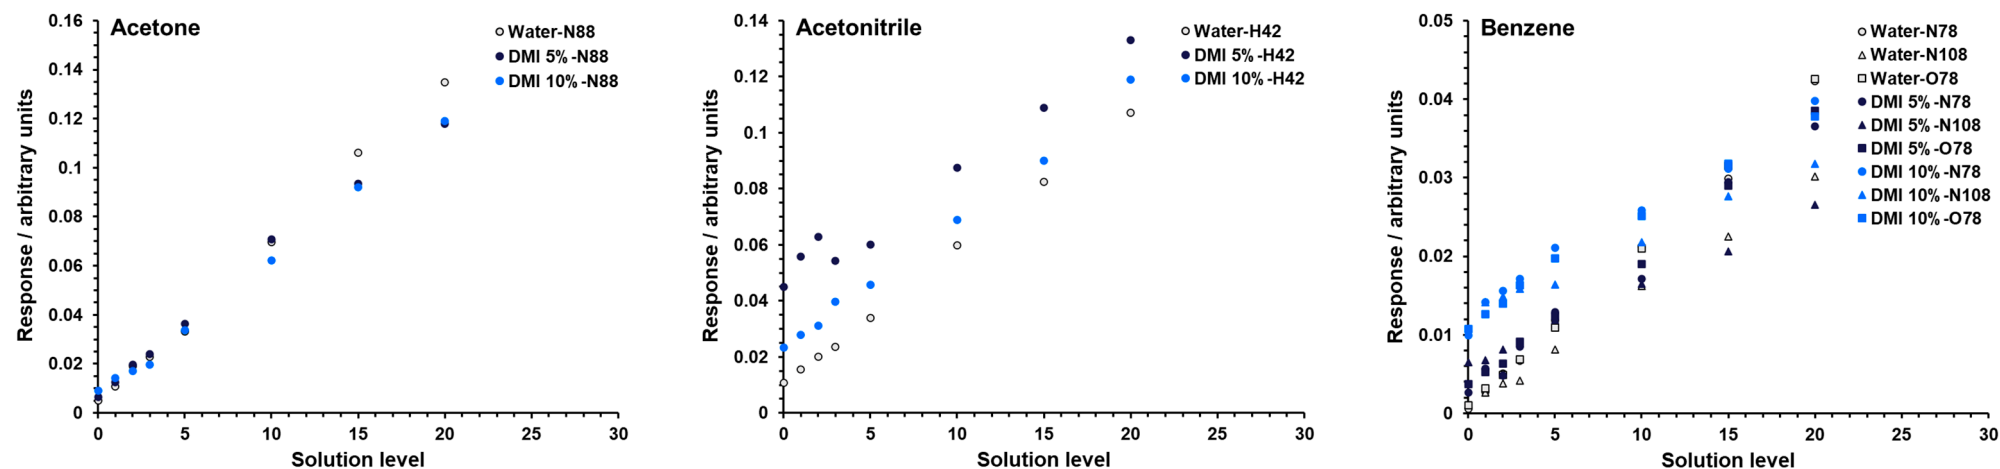

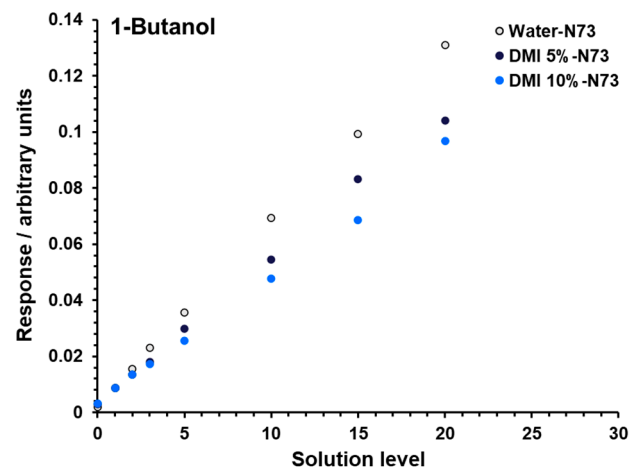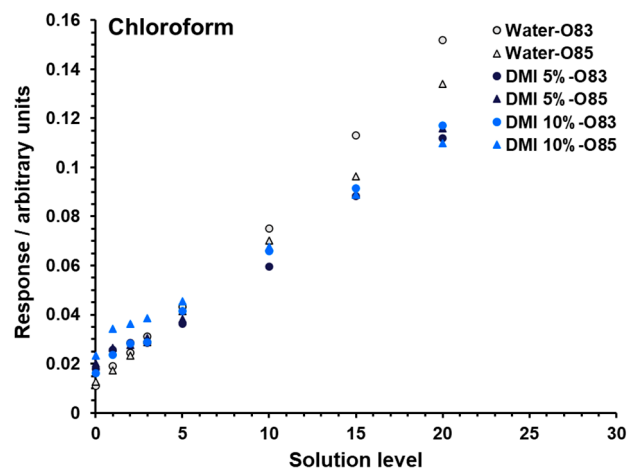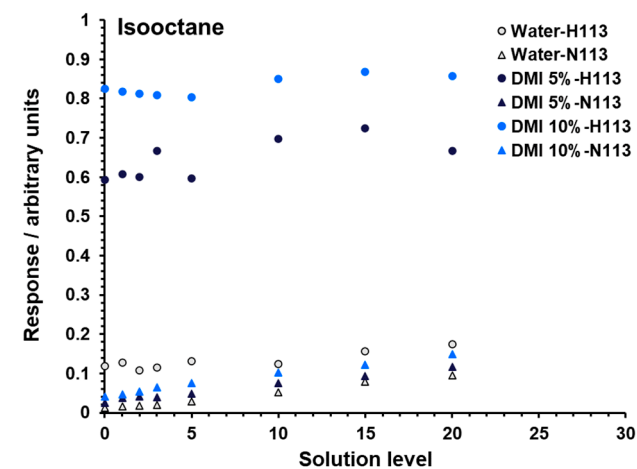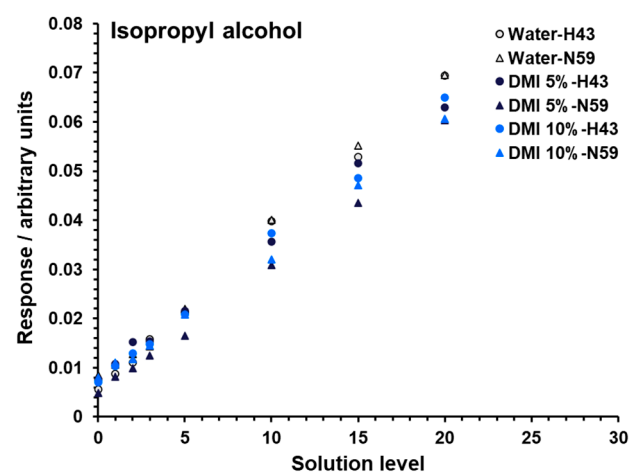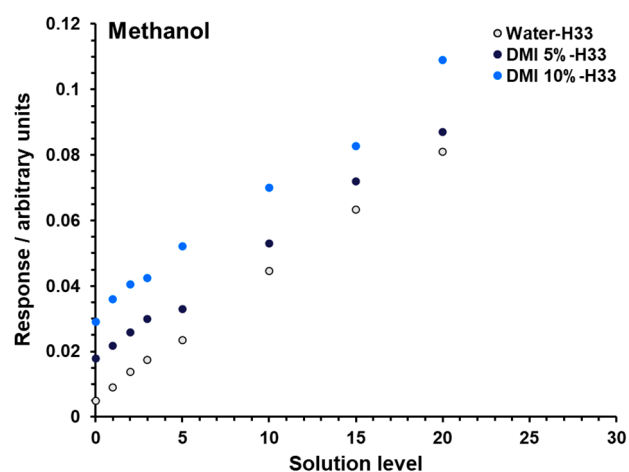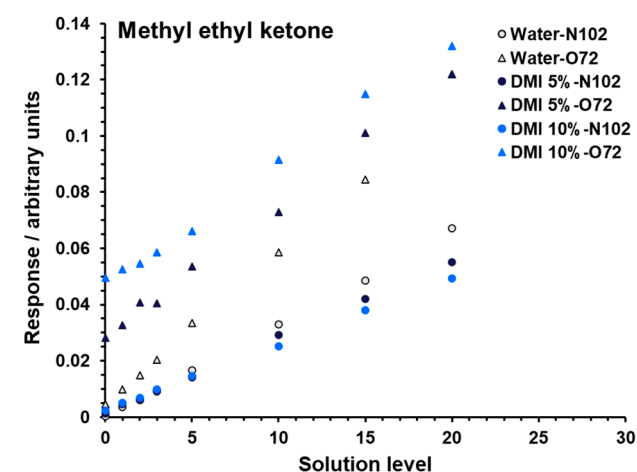

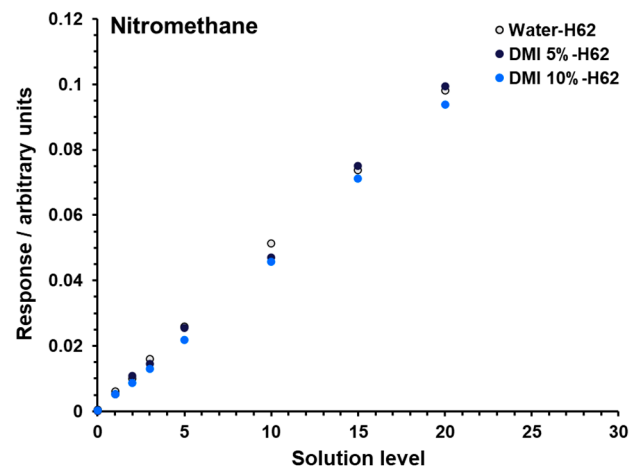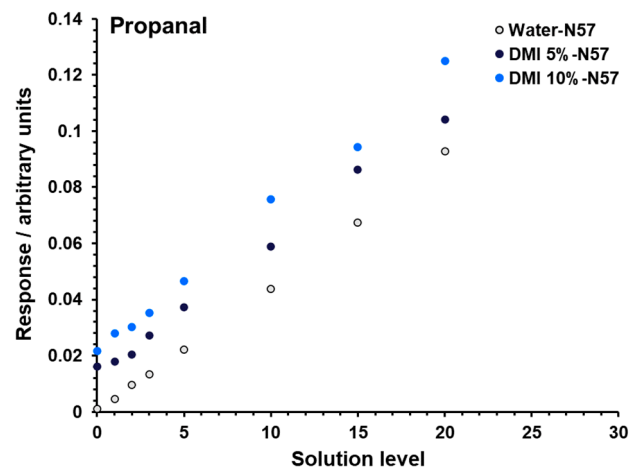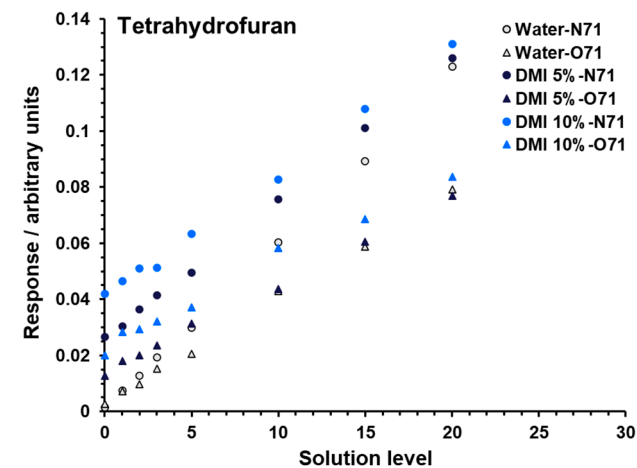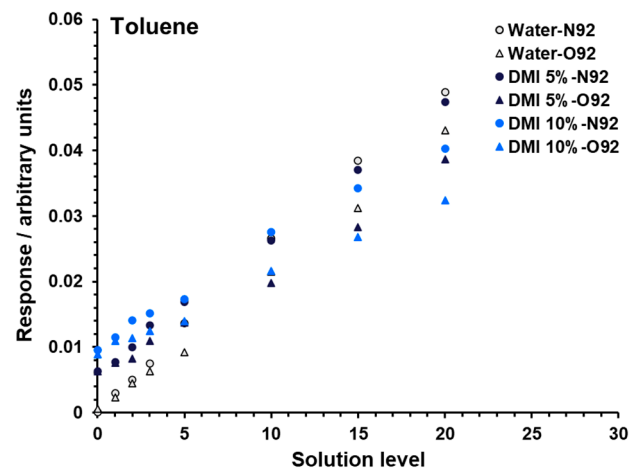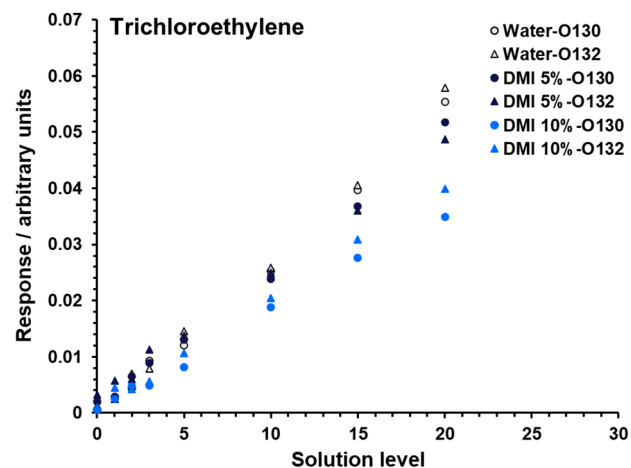

**Figure S7.** SIFT-MS linearity data for the analyte mix in 5, 10, and 25% DMSO (balance water) across the high concentration range.

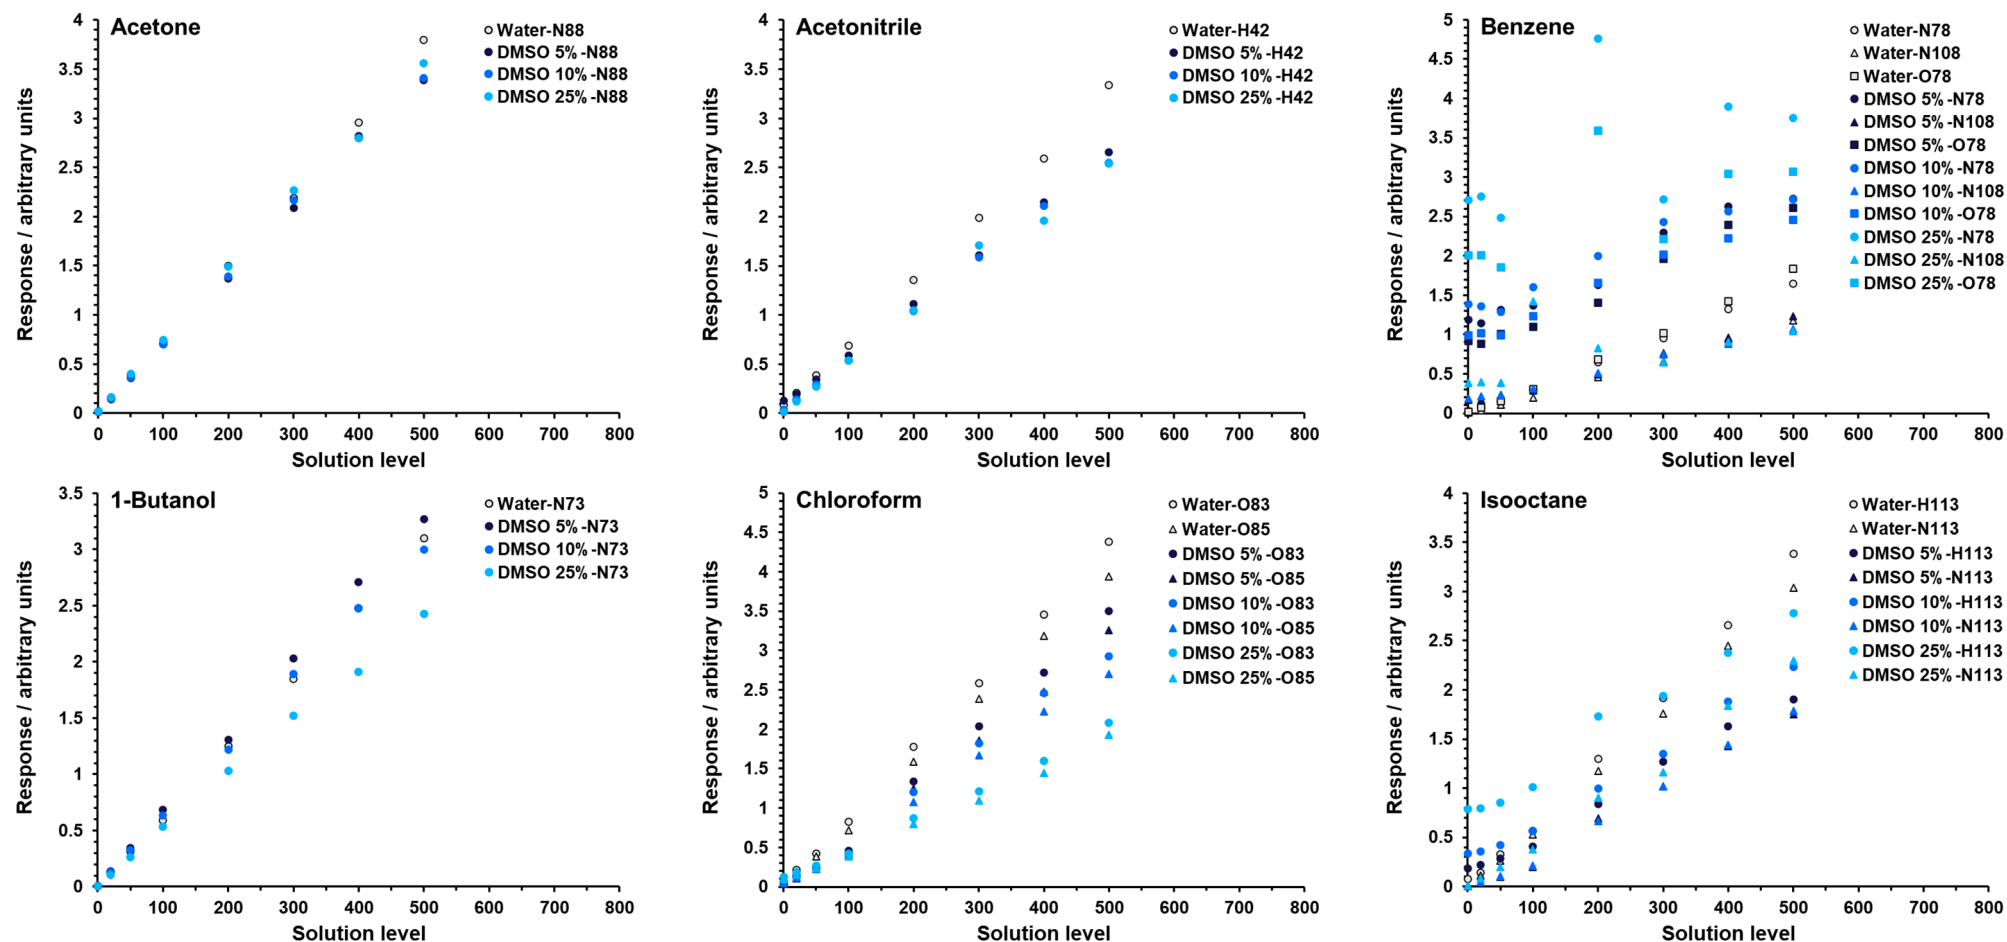

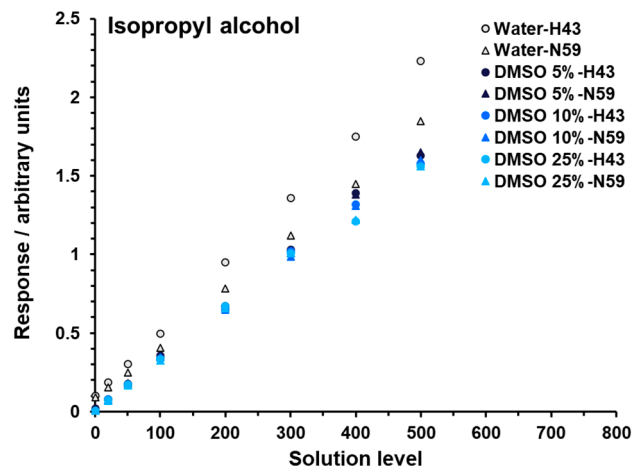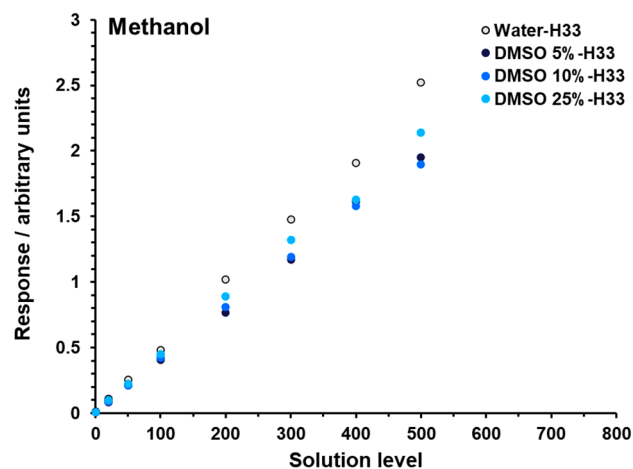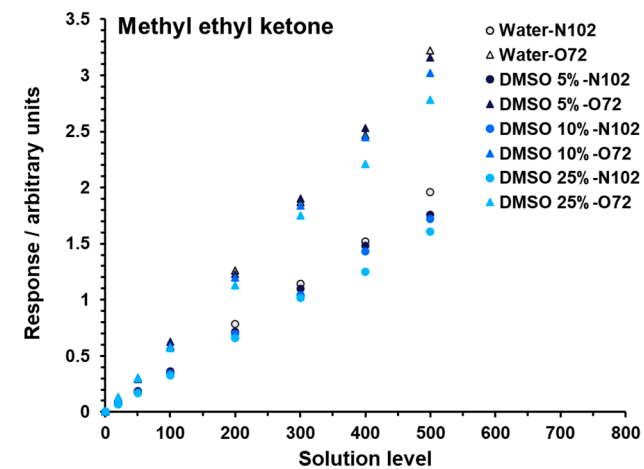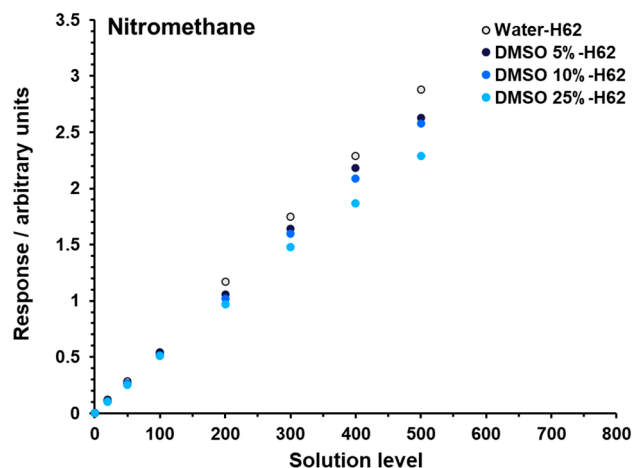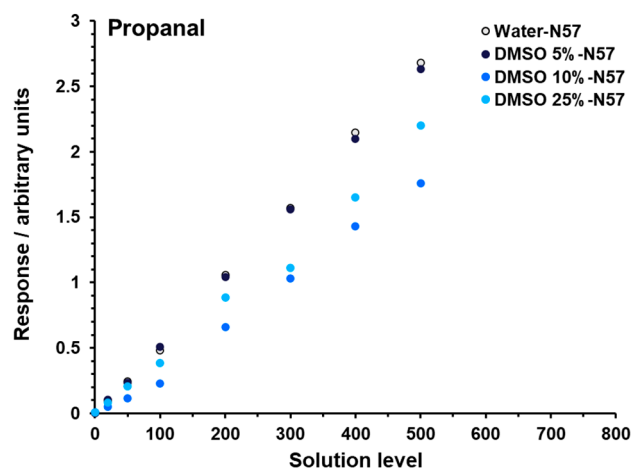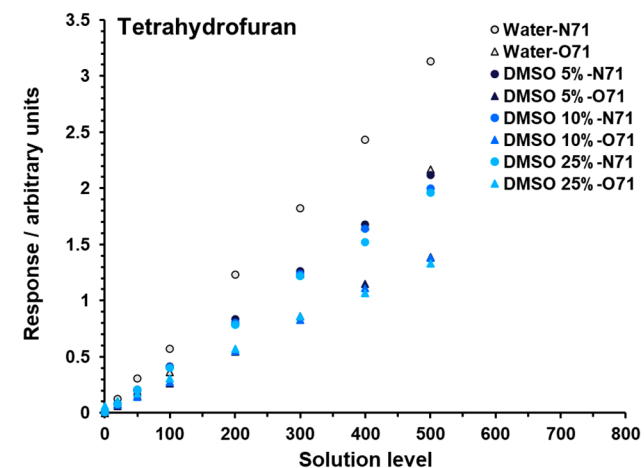

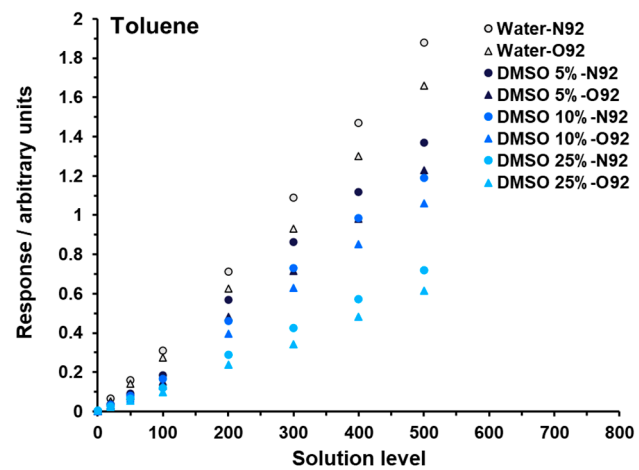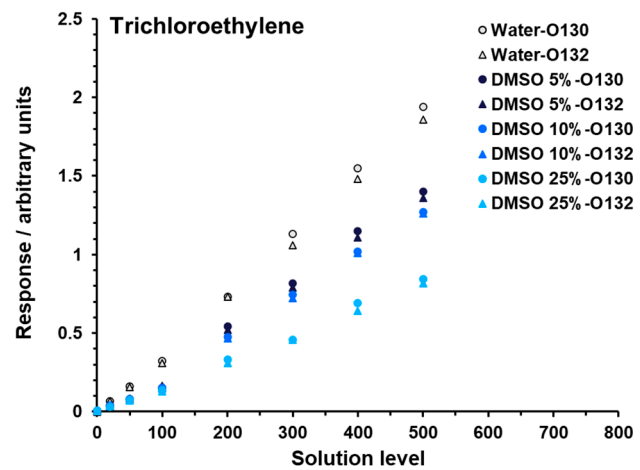

Supplement: s1 [file s1]
